# Supplementary material for: A chromosome-scale assembly of the axolotl genome
Source: HighWire-hosted journal article supplement (doi:10.1101/gr.241901.118), 2019-01-24
Supplement: Supplemental_Table_1.xlsx [file Supplemental_Table_1.xlsx]

## Sheet: Sheet1
Supplementary Table 1 - Candidate misassemblies based on lack of association with the framework map and deviation from expected segregation ratios. Only scaffolds in excess of 0.5 megabases are shown.
scaffold ID	length	number of SNPs detected	proportion of individuals with no genotype called	proportion of genotyped individuals scored as heterozygous
AMEXG_0030001756	12698335	3906	0.3125	0.69697
AMEXG_0030001983	11264430	5190	0.145833	0.756098
AMEXG_0030001799	9792824	4571	0.208333	0.710526
AMEXG_0030001643	7997700	4150	0.229167	0.648649
AMEXG_0030000501	7295968	3302	0.354167	0.83871
AMEXG_0030000717	6820378	3465	0.25	0.638889
AMEXG_0030002088	5704682	2895	0.291667	0.705882
AMEXG_0030002875	5531144	3129	0.166667	0.675
AMEXG_0030001455	5387359	2773	0.333333	0.625
AMEXG_0030003154	5195929	1975	0.145833	0.634146
AMEXG_0030005229	4707685	3896	0.0208333	0.680851
AMEXG_0030003622	4244668	2237	0.0625	0.755556
AMEXG_0030005774	4070117	164	0.104167	0.348837
AMEXG_0030003666	3643827	1536	0.25	0.638889
AMEXG_0030000424	3498173	1881	0.229167	0.702703
AMEXG_0030007180	2652954	403	0.1875	0.692308
AMEXG_0030005064	2459049	516	0.291667	0.823529
AMEXG_0030004782	2280431	835	0	0.666667
AMEXG_0030002811	2259993	139	0.0208333	0.212766
AMEXG_0030004524	2229801	376	0.0208333	0.255319
AMEXG_0030005707	1987661	825	0	0.645833
AMEXG_0030005062	1878610	165	0.145833	0.341463
AMEXG_0030004612	1832567	626	0.145833	0.634146
AMEXG_0030005474	1772414	565	0.0416667	0.608696
AMEXG_0030008113	1581054	182	0.0833333	0.613636
AMEXG_0030005331	1547798	209	0.0625	0.4
AMEXG_0030001705	1547017	86	0.0208333	0.340426
AMEXG_0030005408	1520040	81	0.0625	0.222222
AMEXG_0030009923	1509948	174	0.291667	0.676471
AMEXG_0030007947	1422586	23	0.125	0.619048
AMEXG_0030004310	1344860	796	0.166667	0.6
AMEXG_0030004418	1303894	117	0.0416667	0.304348
AMEXG_0030006384	1250462	181	0.0416667	0.652174
AMEXG_0030006805	1154394	46	0.229167	0.351351
AMEXG_0030003775	1112085	170	0	0.208333
AMEXG_0030007092	1103655	262	0.145833	0.292683
AMEXG_0030007863	1081947	177	0.0625	0.666667
AMEXG_0030005510	1069678	434	0.229167	0.0810811
AMEXG_0030002514	1044177	35	0.0625	0.244444
AMEXG_0030005736	1023582	285	0.0833333	0.613636
AMEXG_0030010848	1015572	32	0	0.395833
AMEXG_0030005414	995526	32	0.208333	0.631579
AMEXG_0030010084	981614	69	0.0625	0.266667
AMEXG_0030006776	980489	230	0.0416667	0.391304
AMEXG_0030003284	956739	794	0	0.604167
AMEXG_0030008686	913890	66	0.145833	0.365854
AMEXG_0030005342	861073	49	0.0208333	0.297872
AMEXG_0030006084	837488	97	0	0.666667
AMEXG_0030014837	813614	28	0.0208333	0.382979
AMEXG_0030005265	808063	178	0.458333	0.692308
AMEXG_0030010894	772905	75	0.0833333	0.363636
AMEXG_0030010338	751591	162	0.125	0.333333
AMEXG_0030007757	742934	83	0.0625	0.844444
AMEXG_0030011414	710268	27	0.0208333	0.617021
AMEXG_0030009346	697143	387	0.270833	0.714286
AMEXG_0030007649	690933	405	0	0.8125
AMEXG_0030009277	666962	147	0.104167	0.348837
AMEXG_0030008310	656271	21	0.229167	0.351351
AMEXG_0030012964	652612	88	0.0833333	0.386364
AMEXG_0030009524	622062	47	0.0208333	0.382979
AMEXG_0030010076	619527	129	0	0.666667
AMEXG_0030006922	614583	290	0.0208333	0.659574
AMEXG_0030009843	607686	25	0.0625	0.666667
AMEXG_0030011791	607146	36	0	0.625
AMEXG_0030004151	605446	50	0.0833333	0.704545
AMEXG_0030005460	592597	133	0.0625	0.6
AMEXG_0030011490	570591	56	0.0208333	0.382979
AMEXG_0030003731	546609	64	0.0208333	0.212766
AMEXG_0030009816	545795	134	0	0.604167
AMEXG_0030010157	543960	204	0.270833	0.657143
AMEXG_0030006295	513639	231	0.0625	0.644444
