# Supplementary material for: A chromosome-scale assembly of the axolotl genome
Source: HighWire-hosted journal article supplement (doi:10.1101/gr.241901.118), 2019-01-24
Supplement: Supplemental_Table_2.xlsx [file Supplemental_Table_2.xlsx]

## Sheet: Sheet1
Supplementary Table 2 - Map positions for 27,674 scaffolds that were assembled onto axolotl chromosomes.
Linkage Group	Position	Scaffold ID	Orientation (orientations in bold itali are inferred directly from RNAseq data)	Genbank Accession Number
chr1	0	AMEXG_0030004647	+	PGSH01056636.1
chr1	0	AMEXG_0030005022	+	PGSH01025211.1
chr1	0	AMEXG_0030009981	+	PGSH01099427.1
chr1	0	AMEXG_0030008717	+	PGSH01018958.1
chr1	0	AMEXG_0030005724	+	PGSH01027734.1
chr1	0	AMEXG_0030109230	+	PGSH01036313.1
chr1	0	AMEXG_0030090192	+	PGSH01114056.1
chr1	0	AMEXG_0030014038	+	PGSH01045417.1
chr1	0	AMEXG_0030121852	+	PGSH01064093.1
chr1	0	AMEXG_0030087860	+	PGSH01073809.1
chr1	2.128	AMEXG_0030036076	+	PGSH01093403.1
chr1	2.128	AMEXG_0030011212	+	PGSH01012693.1
chr1	2.128	AMEXG_0030124501	+	PGSH01125712.1
chr1	2.128	AMEXG_0030063898	+	PGSH01121335.1
chr1	2.128	AMEXG_0030008732	+	PGSH01037822.1
chr1	2.128	AMEXG_0030008894	+	PGSH01115757.1
chr1	2.128	AMEXG_0030033824	+	PGSH01028015.1
chr1	2.128	AMEXG_0030030692	+	PGSH01113461.1
chr1	2.128	AMEXG_0030065616	+	PGSH01018269.1
chr1	2.128	AMEXG_0030063000	+	PGSH01123840.1
chr1	2.128	AMEXG_0030095871	+	PGSH01087716.1
chr1	2.128	AMEXG_0030009920	+	PGSH01022744.1
chr1	2.128	AMEXG_0030023687	+	PGSH01107106.1
chr1	2.128	AMEXG_0030009687	+	PGSH01106966.1
chr1	2.128	AMEXG_0030063791	+	PGSH01112535.1
chr1	2.128	AMEXG_0030071487	+	PGSH01107584.1
chr1	2.128	AMEXG_0030011054	+	PGSH01065499.1
chr1	2.128	AMEXG_0030006160	+	PGSH01072992.1
chr1	2.128	AMEXG_0030011275	+	PGSH01091898.1
chr1	2.128	AMEXG_0030072748	+	PGSH01058574.1
chr1	2.128	AMEXG_0030091616	+	PGSH01018529.1
chr1	2.128	AMEXG_0030008475	+	PGSH01091870.1
chr1	2.128	AMEXG_0030006994	+	PGSH01115738.1
chr1	2.128	AMEXG_0030010908	+	PGSH01007658.1
chr1	2.128	AMEXG_0030008883	+	PGSH01101930.1
chr1	2.128	AMEXG_0030010229	+	PGSH01034066.1
chr1	2.128	AMEXG_0030071893	+	PGSH01115130.1
chr1	2.128	AMEXG_0030009750	+	PGSH01060458.1
chr1	2.128	AMEXG_0030027957	+	PGSH01069439.1
chr1	2.128	AMEXG_0030094764	+	PGSH01078906.1
chr1	2.128	AMEXG_0030094717	+	PGSH01019818.1
chr1	2.128	AMEXG_0030041330	+	PGSH01035634.1
chr1	2.128	AMEXG_0030000696	+	PGSH01119446.1
chr1	2.128	AMEXG_0030079821	+	PGSH01024701.1
chr1	2.128	AMEXG_0030114342	+	PGSH01051448.1
chr1	2.128	AMEXG_0030022781	+	PGSH01099555.1
chr1	2.128	AMEXG_0030005401	+	PGSH01124521.1
chr1	2.128	AMEXG_0030001577	+	PGSH01094315.1
chr1	2.128	AMEXG_0030023270	+	PGSH01085733.1
chr1	2.128	AMEXG_0030003193	+	PGSH01114443.1
chr1	2.128	AMEXG_0030093175	+	PGSH01092717.1
chr1	2.128	AMEXG_0030081832	+	PGSH01038553.1
chr1	2.128	AMEXG_0030011788	+	PGSH01108244.1
chr1	2.128	AMEXG_0030052479	+	PGSH01097338.1
chr1	2.128	AMEXG_0030010200	+	PGSH01123312.1
chr1	2.128	AMEXG_0030007056	+	PGSH01067973.1
chr1	2.128	AMEXG_0030007349	+	PGSH01059177.1
chr1	2.128	AMEXG_0030005857	+	PGSH01069218.1
chr1	2.128	AMEXG_0030005537	+	PGSH01044075.1
chr1	4.255	AMEXG_0030010057	+	PGSH01069260.1
chr1	4.255	AMEXG_0030006192	+	PGSH01113216.1
chr1	4.255	AMEXG_0030060634	+	PGSH01040855.1
chr1	4.255	AMEXG_0030001896	+	PGSH01118201.1
chr1	4.255	AMEXG_0030006788	+	PGSH01108194.1
chr1	4.255	AMEXG_0030082420	+	PGSH01023469.1
chr1	4.255	AMEXG_0030001588	+	PGSH01108142.1
chr1	4.255	AMEXG_0030038297	+	PGSH01119822.1
chr1	4.255	AMEXG_0030075245	+	PGSH01054828.1
chr1	4.255	AMEXG_0030011202	+	PGSH01000113.1
chr1	4.255	AMEXG_0030041598	+	PGSH01121112.1
chr1	4.255	AMEXG_0030000928	+	PGSH01033973.1
chr1	4.255	AMEXG_0030009908	+	PGSH01007648.1
chr1	4.255	AMEXG_0030072127	+	PGSH01032171.1
chr1	4.255	AMEXG_0030049727	+	PGSH01031947.1
chr1	4.255	AMEXG_0030072248	+	PGSH01058569.1
chr1	4.255	AMEXG_0030085596	+	PGSH01119038.1
chr1	4.255	AMEXG_0030005750	+	PGSH01060418.1
chr1	4.255	AMEXG_0030008370	+	PGSH01085584.1
chr1	4.255	AMEXG_0030124558	+	PGSH01071662.1
chr1	4.255	AMEXG_0030123515	+	PGSH01017590.1
chr1	4.255	AMEXG_0030088468	+	PGSH01083871.1
chr1	4.255	AMEXG_0030010125	+	PGSH01029036.1
chr1	4.255	AMEXG_0030033842	+	PGSH01050643.1
chr1	4.255	AMEXG_0030008162	+	PGSH01075526.1
chr1	4.255	AMEXG_0030012023	+	PGSH01026539.1
chr1	4.255	AMEXG_0030004370	+	PGSH01085544.1
chr1	4.255	AMEXG_0030043075	+	PGSH01092216.1
chr1	4.255	AMEXG_0030005755	+	PGSH01066703.1
chr1	4.255	AMEXG_0030122366	+	PGSH01081696.1
chr1	4.255	AMEXG_0030109125	+	PGSH01030026.1
chr1	4.255	AMEXG_0030115035	+	PGSH01042656.1
chr1	4.255	AMEXG_0030013102	+	PGSH01000132.1
chr1	4.255	AMEXG_0030100928	+	PGSH01033716.1
chr1	8.606	AMEXG_0030001459	+	PGSH01071688.1
chr1	8.606	AMEXG_0030073176	+	PGSH01093774.1
chr1	8.606	AMEXG_0030118829	+	PGSH01035152.1
chr1	8.606	AMEXG_0030006747	+	PGSH01056657.1
chr1	8.606	AMEXG_0030006442	+	PGSH01050369.1
chr1	10.734	AMEXG_0030097254	+	PGSH01066361.1
chr1	10.734	AMEXG_0030001683	+	PGSH01101858.1
chr1	10.734	AMEXG_0030002230	+	PGSH01035243.1
chr1	10.734	AMEXG_0030022412	+	PGSH01012805.1
chr1	10.734	AMEXG_0030043184	+	PGSH01103530.1
chr1	10.734	AMEXG_0030005790	+	PGSH01110698.1
chr1	10.734	AMEXG_0030005467	+	PGSH01081784.1
chr1	10.734	AMEXG_0030105150	+	PGSH01061412.1
chr1	10.734	AMEXG_0030004920	+	PGSH01022694.1
chr1	10.734	AMEXG_0030004823	+	PGSH01026467.1
chr1	10.734	AMEXG_0030041219	+	PGSH01021799.1
chr1	10.734	AMEXG_0030000790	+	PGSH01111905.1
chr1	10.734	AMEXG_0030123418	+	PGSH01021363.1
chr1	10.734	AMEXG_0030114051	+	PGSH01062758.1
chr1	10.734	AMEXG_0030063145	+	PGSH01054707.1
chr1	10.734	AMEXG_0030119799	+	PGSH01123151.1
chr1	10.734	AMEXG_0030012441	+	PGSH01049172.1
chr1	10.734	AMEXG_0030015113	+	PGSH01013990.1
chr1	10.734	AMEXG_0030095041	+	PGSH01049998.1
chr1	10.734	AMEXG_0030003709	+	PGSH01008844.1
chr1	10.734	AMEXG_0030007330	+	PGSH01035294.1
chr1	10.734	AMEXG_0030093566	+	PGSH01081408.1
chr1	10.734	AMEXG_0030033392	+	PGSH01113488.1
chr1	10.734	AMEXG_0030036441	+	PGSH01049412.1
chr1	10.734	AMEXG_0030000741	+	PGSH01050312.1
chr1	10.734	AMEXG_0030004441	+	PGSH01049092.1
chr1	10.734	AMEXG_0030060474	+	PGSH01091133.1
chr1	10.734	AMEXG_0030000784	+	PGSH01104363.1
chr1	13.507	AMEXG_0030001646	+	PGSH01055349.1
chr1	19.487	AMEXG_0030003221	+	PGSH01023935.1
chr1	19.487	AMEXG_0030103994	+	PGSH01116708.1
chr1	19.487	AMEXG_0030000602	+	PGSH01001265.1
chr1	21.615	AMEXG_0030001593	+	PGSH01114427.1
chr1	21.615	AMEXG_0030008211	+	PGSH01011405.1
chr1	21.615	AMEXG_0030068532	+	PGSH01038420.1
chr1	21.615	AMEXG_0030006425	+	PGSH01028999.1
chr1	21.615	AMEXG_0030011182	+	PGSH01100696.1
chr1	21.615	AMEXG_0030010430	+	PGSH01035325.1
chr1	21.615	AMEXG_0030005549	+	PGSH01059159.1
chr1	21.615	AMEXG_0030009709	+	PGSH01008904.1
chr1	21.615	AMEXG_0030009042	+	PGSH01050395.1
chr1	21.615	AMEXG_0030087436	+	PGSH01043637.1
chr1	21.615	AMEXG_0030075498	+	PGSH01121451.1
chr1	23.743	AMEXG_0030001807	+	PGSH01006309.1
chr1	23.743	AMEXG_0030018007	+	PGSH01006471.1
chr1	25.87	AMEXG_0030005212	+	PGSH01012633.1
chr1	25.87	AMEXG_0030011576	+	PGSH01093158.1
chr1	25.87	AMEXG_0030028201	+	PGSH01124749.1
chr1	25.87	AMEXG_0030056793	+	PGSH01114979.1
chr1	25.87	AMEXG_0030011949	+	PGSH01059223.1
chr1	25.87	AMEXG_0030003370	+	PGSH01085534.1
chr1	25.87	AMEXG_0030007600	+	PGSH01123286.1
chr1	25.87	AMEXG_0030109123	+	PGSH01027510.1
chr1	25.87	AMEXG_0030003769	+	PGSH01084281.1
chr1	25.87	AMEXG_0030010005	+	PGSH01003875.1
chr1	25.87	AMEXG_0030007373	+	PGSH01089345.1
chr1	25.87	AMEXG_0030009480	+	PGSH01098165.1
chr1	25.87	AMEXG_0030010718	+	PGSH01020236.1
chr1	25.87	AMEXG_0030000475	+	PGSH01093047.1
chr1	25.87	AMEXG_0030053874	+	PGSH01091067.1
chr1	25.87	AMEXG_0030103012	+	PGSH01013611.1
chr1	25.87	AMEXG_0030008335	+	PGSH01041589.1
chr1	25.87	AMEXG_0030004946	+	PGSH01055382.1
chr1	25.87	AMEXG_0030008318	+	PGSH01020212.1
chr1	25.87	AMEXG_0030007510	+	PGSH01010140.1
chr1	25.87	AMEXG_0030104625	+	PGSH01029981.1
chr1	25.87	AMEXG_0030113589	+	PGSH01110519.1
chr1	25.87	AMEXG_0030049982	+	PGSH01101084.1
chr1	25.87	AMEXG_0030014273	+	PGSH01089414.1
chr1	25.87	AMEXG_0030001998	+	PGSH01120716.1
chr1	25.87	AMEXG_0030002051	+	PGSH01061638.1
chr1	25.87	AMEXG_0030001202	+	PGSH01001271.1
chr1	25.87	AMEXG_0030004934	+	PGSH01040298.1
chr1	25.87	AMEXG_0030009538	+	PGSH01045372.1
chr1	25.87	AMEXG_0030009490	+	PGSH01110735.1
chr1	25.87	AMEXG_0030099173	+	PGSH01090263.1
chr1	29.131	AMEXG_0030005312	+	PGSH01012634.1
chr1	32.347	AMEXG_0030004502	+	PGSH01000046.1
chr1	32.347	AMEXG_0030000799	+	PGSH01123218.1
chr1	36.697	AMEXG_0030000701	+	PGSH01000008.1
chr1	41.048	AMEXG_0030004699	+	PGSH01122000.1
chr1	41.048	AMEXG_0030000141	+	PGSH01050306.1
chr1	41.048	AMEXG_0030002838	+	PGSH01045305.1
chr1	41.048	AMEXG_0030118961	+	PGSH01075377.1
chr1	41.048	AMEXG_0030004174	+	PGSH01090570.1
chr1	41.048	AMEXG_0030010130	+	PGSH01035322.1
chr1	41.048	AMEXG_0030005963	+	PGSH01076761.1
chr1	41.048	AMEXG_0030119793	+	PGSH01115609.1
chr1	41.048	AMEXG_0030004773	+	PGSH01089319.1
chr1	41.048	AMEXG_0030103487	+	PGSH01107904.1
chr1	41.048	AMEXG_0030005331	+	PGSH01036531.1
chr1	43.176	AMEXG_0030001068	+	PGSH01084254.1
chr1	43.176	AMEXG_0030000574	+	PGSH01091791.1
chr1	43.176	AMEXG_0030010084	+	PGSH01103199.1
chr1	47.526	AMEXG_0030002199	+	PGSH01121975.1
chr1	48.526	AMEXG_0030001178	+	PGSH01096825.1
chr1	49.632	AMEXG_0030001030	+	PGSH01036488.1
chr1	53.982	AMEXG_0030000972	+	PGSH01089281.1
chr1	53.982	AMEXG_0030002859	+	PGSH01071702.1
chr1	53.982	AMEXG_0030002618	+	PGSH01020155.1
chr1	56.11	AMEXG_0030000630	+	PGSH01036484.1
chr1	56.11	AMEXG_0030012432	+	PGSH01037859.1
chr1	56.11	AMEXG_0030003035	+	PGSH01041536.1
chr1	58.238	AMEXG_0030004784	+	PGSH01103146.1
chr1	58.238	AMEXG_0030085414	+	PGSH01015951.1
chr1	58.238	AMEXG_0030003772	+	PGSH01088052.1
chr1	58.238	AMEXG_0030001469	+	PGSH01084258.1
chr1	59.707	AMEXG_0030108618	+	PGSH01021215.1
chr1	59.707	AMEXG_0030000881	+	PGSH01100593.1
chr1	60.347	AMEXG_0030046264	+	PGSH01078421.1
chr1	60.347	AMEXG_0030000471	+	PGSH01088019.1
chr1	60.347	AMEXG_0030009877	+	PGSH01094398.1
chr1	60.347	AMEXG_0030002176	+	PGSH01093064.1
chr1	60.347	AMEXG_0030038866	+	PGSH01080861.1
chr1	60.347	AMEXG_0030109333	+	PGSH01040085.1
chr1	60.347	AMEXG_0030059721	+	PGSH01024500.1
chr1	60.347	AMEXG_0030009035	+	PGSH01041596.1
chr1	60.347	AMEXG_0030036718	+	PGSH01020496.1
chr1	60.347	AMEXG_0030038064	+	PGSH01078339.1
chr1	60.347	AMEXG_0030018780	+	PGSH01098258.1
chr1	60.347	AMEXG_0030000476	+	PGSH01094304.1
chr1	60.347	AMEXG_0030113616	+	PGSH01018749.1
chr1	60.347	AMEXG_0030059069	+	PGSH01084834.1
chr1	60.347	AMEXG_0030045338	+	PGSH01045730.1
chr1	62.475	AMEXG_0030038137	+	PGSH01044401.1
chr1	62.475	AMEXG_0030103805	+	PGSH01004813.1
chr1	62.475	AMEXG_0030043459	+	PGSH01072108.1
chr1	62.475	AMEXG_0030121030	+	PGSH01036431.1
chr1	62.475	AMEXG_0030006691	+	PGSH01111964.1
chr1	62.475	AMEXG_0030096311	+	PGSH01012286.1
chr1	62.475	AMEXG_0030044685	+	PGSH01104802.1
chr1	62.475	AMEXG_0030077150	+	PGSH01061132.1
chr1	62.475	AMEXG_0030083097	+	PGSH01120270.1
chr1	62.475	AMEXG_0030000571	+	PGSH01088020.1
chr1	62.475	AMEXG_0030068837	+	PGSH01044708.1
chr1	62.475	AMEXG_0030004812	+	PGSH01012629.1
chr1	62.475	AMEXG_0030049853	+	PGSH01064630.1
chr1	62.475	AMEXG_0030023941	+	PGSH01049287.1
chr1	62.475	AMEXG_0030001984	+	PGSH01103118.1
chr1	62.475	AMEXG_0030020170	+	PGSH01085702.1
chr1	62.475	AMEXG_0030003623	+	PGSH01026455.1
chr1	62.475	AMEXG_0030013236	+	PGSH01042895.1
chr1	62.475	AMEXG_0030004697	+	PGSH01119486.1
chr1	62.475	AMEXG_0030014109	+	PGSH01008948.1
chr1	62.475	AMEXG_0030044710	+	PGSH01010512.1
chr1	62.475	AMEXG_0030024473	+	PGSH01089516.1
chr1	62.475	AMEXG_0030001047	+	PGSH01057857.1
chr1	62.475	AMEXG_0030088448	+	PGSH01058731.1
chr1	62.475	AMEXG_0030001543	+	PGSH01051577.1
chr1	62.475	AMEXG_0030033773	+	PGSH01089609.1
chr1	62.475	AMEXG_0030004096	+	PGSH01118223.1
chr1	62.475	AMEXG_0030006704	+	PGSH01002584.1
chr1	62.475	AMEXG_0030101531	+	PGSH01037493.1
chr1	62.475	AMEXG_0030021091	+	PGSH01112108.1
chr1	62.475	AMEXG_0030007078	-	PGSH01095627.1
chr1	62.475	AMEXG_0030025322	+	PGSH01025414.1
chr1	62.475	AMEXG_0030025818	+	PGSH01020387.1
chr1	62.475	AMEXG_0030012636	+	PGSH01042889.1
chr1	62.475	AMEXG_0030003138	+	PGSH01045308.1
chr1	62.475	AMEXG_0030043706	+	PGSH01005470.1
chr1	62.475	AMEXG_0030002348	+	PGSH01057870.1
chr1	62.475	AMEXG_0030010141	+	PGSH01049149.1
chr1	64.603	AMEXG_0030007058	+	PGSH01070487.1
chr1	64.603	AMEXG_0030000216	+	PGSH01018873.1
chr1	64.603	AMEXG_0030000492	+	PGSH01114416.1
chr1	64.603	AMEXG_0030014876	+	PGSH01093191.1
chr1	64.603	AMEXG_0030014962	+	PGSH01075594.1
chr1	64.603	AMEXG_0030088275	+	PGSH01092668.1
chr1	64.603	AMEXG_0030047073	+	PGSH01089742.1
chr1	64.603	AMEXG_0030074485	+	PGSH01105100.1
chr1	64.603	AMEXG_0030001811	+	PGSH01011341.1
chr1	64.603	AMEXG_0030012402	+	PGSH01000125.1
chr1	64.603	AMEXG_0030011113	+	PGSH01013950.1
chr1	64.603	AMEXG_0030096728	+	PGSH01033674.1
chr1	64.603	AMEXG_0030005900	+	PGSH01123269.1
chr1	64.603	AMEXG_0030099750	+	PGSH01061358.1
chr1	64.603	AMEXG_0030074684	+	PGSH01103845.1
chr1	64.603	AMEXG_0030003575	+	PGSH01091821.1
chr1	64.603	AMEXG_0030007508	+	PGSH01007624.1
chr1	64.603	AMEXG_0030091390	+	PGSH01111554.1
chr1	64.603	AMEXG_0030097130	+	PGSH01036192.1
chr1	64.603	AMEXG_0030117201	+	PGSH01125639.1
chr1	64.603	AMEXG_0030008080	+	PGSH01098151.1
chr1	64.603	AMEXG_0030012533	+	PGSH01039117.1
chr1	64.603	AMEXG_0030001732	+	PGSH01037752.1
chr1	64.603	AMEXG_0030011059	+	PGSH01071784.1
chr1	64.603	AMEXG_0030002326	+	PGSH01030216.1
chr1	64.603	AMEXG_0030063562	+	PGSH01076080.1
chr1	64.603	AMEXG_0030011510	+	PGSH01010180.1
chr1	64.603	AMEXG_0030092494	+	PGSH01116593.1
chr1	64.603	AMEXG_0030104478	+	PGSH01096601.1
chr1	64.603	AMEXG_0030006282	+	PGSH01100647.1
chr1	64.603	AMEXG_0030006423	+	PGSH01026483.1
chr1	64.603	AMEXG_0030057390	+	PGSH01111214.1
chr1	64.603	AMEXG_0030014950	+	PGSH01060510.1
chr1	64.603	AMEXG_0030055815	+	PGSH01016913.1
chr1	64.603	AMEXG_0030028957	+	PGSH01069449.1
chr1	64.603	AMEXG_0030042172	+	PGSH01088436.1
chr1	64.603	AMEXG_0030061598	+	PGSH01121312.1
chr1	64.603	AMEXG_0030062884	+	PGSH01103727.1
chr1	64.603	AMEXG_0030045414	+	PGSH01015551.1
chr1	64.603	AMEXG_0030003395	+	PGSH01116959.1
chr1	64.603	AMEXG_0030091233	+	PGSH01039904.1
chr1	64.603	AMEXG_0030009250	+	PGSH01060453.1
chr1	64.603	AMEXG_0030011055	+	PGSH01066756.1
chr1	64.603	AMEXG_0030030411	+	PGSH01011627.1
chr1	64.603	AMEXG_0030082056	+	PGSH01068723.1
chr1	64.603	AMEXG_0030041041	+	PGSH01049458.1
chr1	64.603	AMEXG_0030073237	+	PGSH01044752.1
chr1	64.603	AMEXG_0030121594	+	PGSH01116884.1
chr1	64.603	AMEXG_0030038434	+	PGSH01040633.1
chr1	64.603	AMEXG_0030008667	+	PGSH01081816.1
chr1	64.603	AMEXG_0030023638	+	PGSH01045513.1
chr1	64.603	AMEXG_0030118812	+	PGSH01013769.1
chr1	64.603	AMEXG_0030110487	+	PGSH01107974.1
chr1	64.603	AMEXG_0030002543	+	PGSH01051587.1
chr1	64.603	AMEXG_0030022604	+	PGSH01002743.1
chr1	64.603	AMEXG_0030125333	+	PGSH01040245.1
chr1	64.603	AMEXG_0030125149	+	PGSH01060355.1
chr1	64.603	AMEXG_0030011612	+	PGSH01012697.1
chr1	64.603	AMEXG_0030007304	+	PGSH01002590.1
chr1	64.603	AMEXG_0030006503	+	PGSH01001324.1
chr1	64.603	AMEXG_0030024001	+	PGSH01124707.1
chr1	64.603	AMEXG_0030125416	+	PGSH01018867.1
chr1	64.603	AMEXG_0030051622	+	PGSH01025677.1
chr1	64.603	AMEXG_0030095952	+	PGSH01063834.1
chr1	64.603	AMEXG_0030039860	+	PGSH01073329.1
chr1	64.603	AMEXG_0030081367	+	PGSH01082543.1
chr1	64.603	AMEXG_0030038938	+	PGSH01045666.1
chr1	64.603	AMEXG_0030055138	+	PGSH01045828.1
chr1	64.603	AMEXG_0030047927	+	PGSH01031929.1
chr1	64.603	AMEXG_0030012289	+	PGSH01109506.1
chr1	64.603	AMEXG_0030122771	+	PGSH01087985.1
chr1	64.603	AMEXG_0030078853	+	PGSH01064920.1
chr1	64.603	AMEXG_0030105608	+	PGSH01008605.1
chr1	64.603	AMEXG_0030114819	+	PGSH01022535.1
chr1	64.603	AMEXG_0030090057	+	PGSH01070060.1
chr1	64.603	AMEXG_0030001410	+	PGSH01010079.1
chr1	64.603	AMEXG_0030000375	+	PGSH01093046.1
chr1	64.603	AMEXG_0030124056	+	PGSH01069143.1
chr1	64.603	AMEXG_0030000418	+	PGSH01021391.1
chr1	64.603	AMEXG_0030004775	+	PGSH01091833.1
chr1	64.603	AMEXG_0030005670	+	PGSH01085557.1
chr1	64.603	AMEXG_0030003400	+	PGSH01123244.1
chr1	64.603	AMEXG_0030026795	+	PGSH01117193.1
chr1	64.603	AMEXG_0030091126	+	PGSH01031104.1
chr1	66.731	AMEXG_0030009683	+	PGSH01101938.1
chr1	66.731	AMEXG_0030027238	+	PGSH01045549.1
chr1	68.859	AMEXG_0030009084	+	PGSH01103189.1
chr1	68.859	AMEXG_0030004742	+	PGSH01050352.1
chr1	68.859	AMEXG_0030009744	+	PGSH01052916.1
chr1	68.859	AMEXG_0030004863	+	PGSH01076750.1
chr1	68.859	AMEXG_0030010002	+	PGSH01000101.1
chr1	68.859	AMEXG_0030011384	+	PGSH01103212.1
chr1	68.859	AMEXG_0030003348	+	PGSH01057880.1
chr1	68.859	AMEXG_0030089781	+	PGSH01100225.1
chr1	68.859	AMEXG_0030007139	+	PGSH01046605.1
chr1	68.859	AMEXG_0030019400	+	PGSH01123404.1
chr1	68.859	AMEXG_0030062827	+	PGSH01032078.1
chr1	68.859	AMEXG_0030072032	+	PGSH01038455.1
chr1	68.859	AMEXG_0030028334	+	PGSH01040532.1
chr1	68.859	AMEXG_0030089739	+	PGSH01047431.1
chr1	68.859	AMEXG_0030060119	+	PGSH01021988.1
chr1	68.859	AMEXG_0030101474	+	PGSH01091543.1
chr1	68.859	AMEXG_0030038770	+	PGSH01085888.1
chr1	68.859	AMEXG_0030079401	+	PGSH01125261.1
chr1	68.859	AMEXG_0030072657	+	PGSH01069886.1
chr1	70.987	AMEXG_0030007617	+	PGSH01018947.1
chr1	70.987	AMEXG_0030064808	+	PGSH01008197.1
chr1	73.115	AMEXG_0030008293	+	PGSH01114494.1
chr1	73.115	AMEXG_0030109211	+	PGSH01012415.1
chr1	73.115	AMEXG_0030038606	+	PGSH01005419.1
chr1	73.115	AMEXG_0030046103	+	PGSH01001720.1
chr1	73.115	AMEXG_0030043220	+	PGSH01023077.1
chr1	73.115	AMEXG_0030002851	+	PGSH01061646.1
chr1	73.115	AMEXG_0030000737	+	PGSH01045284.1
chr1	73.115	AMEXG_0030008826	+	PGSH01030281.1
chr1	73.115	AMEXG_0030000545	+	PGSH01055338.1
chr1	73.115	AMEXG_0030005802	+	PGSH01000059.1
chr1	73.115	AMEXG_0030048459	+	PGSH01072158.1
chr1	73.115	AMEXG_0030005206	+	PGSH01005085.1
chr1	73.115	AMEXG_0030011435	+	PGSH01041620.1
chr1	73.115	AMEXG_0030005867	+	PGSH01081788.1
chr1	73.115	AMEXG_0030124590	+	PGSH01111886.1
chr1	73.115	AMEXG_0030005765	+	PGSH01079273.1
chr1	73.115	AMEXG_0030016574	+	PGSH01090694.1
chr1	73.115	AMEXG_0030002579	+	PGSH01096839.1
chr1	73.115	AMEXG_0030008504	+	PGSH01002602.1
chr1	73.115	AMEXG_0030109431	+	PGSH01037572.1
chr1	73.115	AMEXG_0030007083	+	PGSH01101912.1
chr1	73.115	AMEXG_0030004395	+	PGSH01116969.1
chr1	73.115	AMEXG_0030009229	+	PGSH01034056.1
chr1	73.115	AMEXG_0030081238	+	PGSH01046089.1
chr1	73.115	AMEXG_0030008227	+	PGSH01031532.1
chr1	73.115	AMEXG_0030027198	+	PGSH01120968.1
chr1	73.115	AMEXG_0030005363	+	PGSH01076755.1
chr1	73.115	AMEXG_0030002301	+	PGSH01124490.1
chr1	73.115	AMEXG_0030001162	+	PGSH01076713.1
chr1	73.115	AMEXG_0030002882	+	PGSH01100613.1
chr1	73.115	AMEXG_0030021168	+	PGSH01083198.1
chr1	73.115	AMEXG_0030006338	+	PGSH01045340.1
chr1	73.115	AMEXG_0030006996	+	PGSH01118252.1
chr1	73.115	AMEXG_0030069084	+	PGSH01103789.1
chr1	73.115	AMEXG_0030059172	+	PGSH01088606.1
chr1	73.115	AMEXG_0030119482	+	PGSH01101779.1
chr1	73.115	AMEXG_0030006174	+	PGSH01090590.1
chr1	73.115	AMEXG_0030006179	+	PGSH01096875.1
chr1	73.115	AMEXG_0030114357	+	PGSH01070303.1
chr1	73.115	AMEXG_0030020447	+	PGSH01056794.1
chr1	73.115	AMEXG_0030075601	+	PGSH01125223.1
chr1	73.115	AMEXG_0030007381	+	PGSH01099401.1
chr1	73.115	AMEXG_0030077373	+	PGSH01090045.1
chr1	73.115	AMEXG_0030003548	+	PGSH01057882.1
chr1	73.115	AMEXG_0030075179	+	PGSH01097565.1
chr1	73.115	AMEXG_0030106097	+	PGSH01120500.1
chr1	73.115	AMEXG_0030044979	+	PGSH01097263.1
chr1	73.115	AMEXG_0030033310	+	PGSH01010398.1
chr1	77.465	AMEXG_0030044294	+	PGSH01116111.1
chr1	77.465	AMEXG_0030033786	+	PGSH01105950.1
chr1	77.465	AMEXG_0030008085	+	PGSH01104436.1
chr1	77.465	AMEXG_0030006777	+	PGSH01094367.1
chr1	77.465	AMEXG_0030003242	+	PGSH01050337.1
chr1	77.465	AMEXG_0030085975	+	PGSH01092645.1
chr1	77.465	AMEXG_0030009857	+	PGSH01069258.1
chr1	77.465	AMEXG_0030079483	+	PGSH01102636.1
chr1	77.465	AMEXG_0030056057	+	PGSH01069720.1
chr1	77.465	AMEXG_0030008927	+	PGSH01031539.1
chr1	77.465	AMEXG_0030012654	+	PGSH01065515.1
chr1	77.465	AMEXG_0030010332	+	PGSH01037838.1
chr1	77.465	AMEXG_0030008607	+	PGSH01006377.1
chr1	77.465	AMEXG_0030083940	+	PGSH01048630.1
chr1	77.465	AMEXG_0030008281	+	PGSH01099410.1
chr1	77.465	AMEXG_0030116541	+	PGSH01050213.1
chr1	77.465	AMEXG_0030065629	+	PGSH01034620.1
chr1	77.465	AMEXG_0030095921	+	PGSH01024862.1
chr1	77.465	AMEXG_0030002833	+	PGSH01039020.1
chr1	77.465	AMEXG_0030004276	+	PGSH01093085.1
chr1	77.465	AMEXG_0030076105	+	PGSH01004536.1
chr1	77.465	AMEXG_0030062032	+	PGSH01038355.1
chr1	77.465	AMEXG_0030087480	+	PGSH01098945.1
chr1	77.465	AMEXG_0030003448	+	PGSH01057881.1
chr1	77.465	AMEXG_0030056225	+	PGSH01029497.1
chr1	77.465	AMEXG_0030006674	+	PGSH01090595.1
chr1	77.465	AMEXG_0030027462	+	PGSH01075719.1
chr1	77.465	AMEXG_0030009743	+	PGSH01051659.1
chr1	77.465	AMEXG_0030022560	+	PGSH01073156.1
chr1	77.465	AMEXG_0030044118	+	PGSH01020570.1
chr1	81.816	AMEXG_0030057379	+	PGSH01097387.1
chr1	81.816	AMEXG_0030060952	+	PGSH01063484.1
chr1	81.816	AMEXG_0030058496	+	PGSH01118767.1
chr1	81.816	AMEXG_0030055657	+	PGSH01069716.1
chr1	81.816	AMEXG_0030077528	+	PGSH01033482.1
chr1	81.816	AMEXG_0030106265	+	PGSH01080278.1
chr1	81.816	AMEXG_0030002159	+	PGSH01071695.1
chr1	81.816	AMEXG_0030031569	+	PGSH01084559.1
chr1	81.816	AMEXG_0030032598	+	PGSH01121022.1
chr1	81.816	AMEXG_0030078445	+	PGSH01054860.1
chr1	81.816	AMEXG_0030045064	+	PGSH01078409.1
chr1	81.816	AMEXG_0030094101	+	PGSH01125408.1
chr1	81.816	AMEXG_0030000511	+	PGSH01012586.1
chr1	81.816	AMEXG_0030003274	+	PGSH01090561.1
chr1	81.816	AMEXG_0030110386	+	PGSH01106716.1
chr1	81.816	AMEXG_0030003998	+	PGSH01120736.1
chr1	81.816	AMEXG_0030011465	+	PGSH01079330.1
chr1	81.816	AMEXG_0030112190	+	PGSH01111762.1
chr1	81.816	AMEXG_0030001523	+	PGSH01026434.1
chr1	81.816	AMEXG_0030042562	+	PGSH01075870.1
chr1	81.816	AMEXG_0030038462	+	PGSH01075829.1
chr1	81.816	AMEXG_0030033011	+	PGSH01011653.1
chr1	81.816	AMEXG_0030007070	+	PGSH01085571.1
chr1	81.816	AMEXG_0030002034	+	PGSH01040269.1
chr1	81.816	AMEXG_0030014446	+	PGSH01055477.1
chr1	81.816	AMEXG_0030013507	+	PGSH01006426.1
chr1	81.816	AMEXG_0030011659	+	PGSH01071790.1
chr1	81.816	AMEXG_0030119086	+	PGSH01106803.1
chr1	81.816	AMEXG_0030005954	+	PGSH01065448.1
chr1	81.816	AMEXG_0030004023	+	PGSH01026459.1
chr1	81.816	AMEXG_0030072509	+	PGSH01009532.1
chr1	81.816	AMEXG_0030063277	+	PGSH01094932.1
chr1	81.816	AMEXG_0030067236	+	PGSH01043435.1
chr1	81.816	AMEXG_0030121568	+	PGSH01084202.1
chr1	81.816	AMEXG_0030072902	+	PGSH01000730.1
chr1	81.816	AMEXG_0030107597	+	PGSH01120515.1
chr1	81.816	AMEXG_0030004295	+	PGSH01116968.1
chr1	81.816	AMEXG_0030009371	+	PGSH01086851.1
chr1	81.816	AMEXG_0030004493	+	PGSH01114456.1
chr1	81.816	AMEXG_0030123514	+	PGSH01016332.1
chr1	81.816	AMEXG_0030013814	+	PGSH01015235.1
chr1	81.816	AMEXG_0030014338	+	PGSH01045420.1
chr1	81.816	AMEXG_0030040064	+	PGSH01078359.1
chr1	81.816	AMEXG_0030008541	+	PGSH01049133.1
chr1	81.816	AMEXG_0030018390	+	PGSH01110824.1
chr1	83.944	AMEXG_0030118863	+	PGSH01077890.1
chr1	83.944	AMEXG_0030091899	+	PGSH01122872.1
chr1	83.944	AMEXG_0030000712	+	PGSH01013846.1
chr1	86.072	AMEXG_0030046522	+	PGSH01025626.1
chr1	86.072	AMEXG_0030123835	+	PGSH01042744.1
chr1	86.072	AMEXG_0030000698	+	PGSH01121960.1
chr1	86.072	AMEXG_0030041776	+	PGSH01093460.1
chr1	86.072	AMEXG_0030077074	+	PGSH01091299.1
chr1	86.072	AMEXG_0030013339	+	PGSH01046667.1
chr1	86.072	AMEXG_0030010186	+	PGSH01105714.1
chr1	86.072	AMEXG_0030065021	+	PGSH01024553.1
chr1	86.072	AMEXG_0030102090	+	PGSH01111661.1
chr1	86.072	AMEXG_0030073413	+	PGSH01014573.1
chr1	86.072	AMEXG_0030091318	+	PGSH01021042.1
chr1	88.2	AMEXG_0030001031	+	PGSH01037745.1
chr1	88.2	AMEXG_0030003194	+	PGSH01115700.1
chr1	88.2	AMEXG_0030003043	+	PGSH01051592.1
chr1	88.2	AMEXG_0030103690	+	PGSH01111677.1
chr1	88.2	AMEXG_0030007928	+	PGSH01032786.1
chr1	88.2	AMEXG_0030005553	+	PGSH01064187.1
chr1	88.2	AMEXG_0030095464	+	PGSH01078913.1
chr1	88.2	AMEXG_0030001457	+	PGSH01069174.1
chr1	88.2	AMEXG_0030116236	+	PGSH01043925.1
chr1	88.2	AMEXG_0030046006	+	PGSH01005493.1
chr1	88.2	AMEXG_0030095683	+	PGSH01102798.1
chr1	88.2	AMEXG_0030065377	+	PGSH01094953.1
chr1	88.2	AMEXG_0030008533	+	PGSH01039077.1
chr1	88.2	AMEXG_0030005751	+	PGSH01061675.1
chr1	88.2	AMEXG_0030044827	+	PGSH01031898.1
chr1	88.2	AMEXG_0030028871	+	PGSH01087046.1
chr1	88.2	AMEXG_0030008182	+	PGSH01100666.1
chr1	88.2	AMEXG_0030001333	+	PGSH01040262.1
chr1	88.2	AMEXG_0030002020	+	PGSH01022665.1
chr1	88.2	AMEXG_0030015109	+	PGSH01008958.1
chr1	88.2	AMEXG_0030119943	+	PGSH01052761.1
chr1	88.2	AMEXG_0030007447	+	PGSH01056664.1
chr1	88.2	AMEXG_0030034546	+	PGSH01055678.1
chr1	88.2	AMEXG_0030006019	+	PGSH01021447.1
chr1	88.2	AMEXG_0030000390	+	PGSH01111901.1
chr1	88.2	AMEXG_0030006762	+	PGSH01075512.1
chr1	88.2	AMEXG_0030004340	+	PGSH01047834.1
chr1	88.2	AMEXG_0030059267	+	PGSH01082322.1
chr1	88.2	AMEXG_0030098214	+	PGSH01016079.1
chr1	88.2	AMEXG_0030001415	+	PGSH01016369.1
chr1	88.2	AMEXG_0030003814	+	PGSH01015135.1
chr1	88.2	AMEXG_0030116828	+	PGSH01033875.1
chr1	88.2	AMEXG_0030104849	+	PGSH01060152.1
chr1	88.2	AMEXG_0030005166	+	PGSH01080524.1
chr1	88.2	AMEXG_0030080621	+	PGSH01024709.1
chr1	88.2	AMEXG_0030082017	+	PGSH01019691.1
chr1	90.328	AMEXG_0030006871	+	PGSH01086826.1
chr1	90.328	AMEXG_0030077712	+	PGSH01013358.1
chr1	90.328	AMEXG_0030086956	+	PGSH01068772.1
chr1	90.328	AMEXG_0030052147	+	PGSH01057111.1
chr1	90.328	AMEXG_0030008642	+	PGSH01050391.1
chr1	90.328	AMEXG_0030002591	+	PGSH01111923.1
chr1	90.328	AMEXG_0030104893	+	PGSH01115460.1
chr1	90.328	AMEXG_0030014303	+	PGSH01001402.1
chr1	90.328	AMEXG_0030072581	+	PGSH01100053.1
chr1	92.456	AMEXG_0030060149	+	PGSH01059705.1
chr1	92.456	AMEXG_0030044049	+	PGSH01059544.1
chr1	92.456	AMEXG_0030001550	+	PGSH01060376.1
chr1	92.456	AMEXG_0030101375	+	PGSH01092799.1
chr1	92.456	AMEXG_0030090754	+	PGSH01066296.1
chr1	92.456	AMEXG_0030005386	+	PGSH01105666.1
chr1	92.456	AMEXG_0030040585	+	PGSH01104761.1
chr1	92.456	AMEXG_0030039724	+	PGSH01028074.1
chr1	92.456	AMEXG_0030003020	+	PGSH01022675.1
chr1	92.456	AMEXG_0030078452	+	PGSH01063659.1
chr1	92.456	AMEXG_0030107955	+	PGSH01067725.1
chr1	92.456	AMEXG_0030108672	+	PGSH01089101.1
chr1	92.456	AMEXG_0030096528	+	PGSH01033672.1
chr1	92.456	AMEXG_0030006112	+	PGSH01012642.1
chr1	92.456	AMEXG_0030014567	+	PGSH01081875.1
chr1	92.456	AMEXG_0030073710	+	PGSH01010802.1
chr1	92.456	AMEXG_0030031414	+	PGSH01015411.1
chr1	92.456	AMEXG_0030096271	+	PGSH01087720.1
chr1	92.456	AMEXG_0030000546	+	PGSH01056595.1
chr1	92.456	AMEXG_0030009707	+	PGSH01006388.1
chr1	92.456	AMEXG_0030014209	+	PGSH01008949.1
chr1	92.456	AMEXG_0030078533	+	PGSH01039777.1
chr1	94.584	AMEXG_0030043594	+	PGSH01116104.1
chr1	94.584	AMEXG_0030001098	+	PGSH01121964.1
chr1	94.584	AMEXG_0030001834	+	PGSH01040267.1
chr1	94.584	AMEXG_0030048167	+	PGSH01082211.1
chr1	94.584	AMEXG_0030106806	+	PGSH01006101.1
chr1	98.821	AMEXG_0030004703	+	PGSH01001306.1
chr1	98.925	AMEXG_0030003572	+	PGSH01088050.1
chr1	98.925	AMEXG_0030005576	+	PGSH01093098.1
chr1	98.925	AMEXG_0030010812	+	PGSH01012689.1
chr1	98.925	AMEXG_0030004664	+	PGSH01078005.1
chr1	98.925	AMEXG_0030123783	+	PGSH01103079.1
chr1	98.925	AMEXG_0030000860	+	PGSH01074196.1
chr1	98.925	AMEXG_0030072318	+	PGSH01020852.1
chr1	98.925	AMEXG_0030109944	+	PGSH01053918.1
chr1	98.925	AMEXG_0030011507	+	PGSH01006406.1
chr1	98.925	AMEXG_0030104477	+	PGSH01095344.1
chr1	98.925	AMEXG_0030006781	+	PGSH01099395.1
chr1	98.925	AMEXG_0030012477	+	PGSH01094424.1
chr1	98.925	AMEXG_0030014690	+	PGSH01110787.1
chr1	98.925	AMEXG_0030081834	+	PGSH01041067.1
chr1	98.925	AMEXG_0030008212	+	PGSH01012663.1
chr1	98.925	AMEXG_0030064550	+	PGSH01061006.1
chr1	101.053	AMEXG_0030063112	+	PGSH01013212.1
chr1	101.053	AMEXG_0030008100	+	PGSH01123291.1
chr1	101.053	AMEXG_0030007742	+	PGSH01050382.1
chr1	101.053	AMEXG_0030009928	+	PGSH01032806.1
chr1	101.053	AMEXG_0030023463	+	PGSH01076936.1
chr1	101.053	AMEXG_0030120302	+	PGSH01001204.1
chr1	101.053	AMEXG_0030065045	+	PGSH01054726.1
chr1	101.053	AMEXG_0030037301	+	PGSH01124840.1
chr1	101.053	AMEXG_0030124966	+	PGSH01081722.1
chr1	101.053	AMEXG_0030094798	+	PGSH01121644.1
chr1	101.053	AMEXG_0030052401	+	PGSH01124991.1
chr1	101.053	AMEXG_0030004898	+	PGSH01120745.1
chr1	101.053	AMEXG_0030055035	+	PGSH01042056.1
chr1	101.053	AMEXG_0030004085	+	PGSH01104396.1
chr1	101.053	AMEXG_0030004212	+	PGSH01012623.1
chr1	101.053	AMEXG_0030050965	+	PGSH01079725.1
chr1	101.053	AMEXG_0030025757	+	PGSH01069417.1
chr1	101.053	AMEXG_0030043024	+	PGSH01028107.1
chr1	101.053	AMEXG_0030041884	+	PGSH01103517.1
chr1	101.053	AMEXG_0030083281	+	PGSH01100160.1
chr1	101.053	AMEXG_0030074442	+	PGSH01051049.1
chr1	101.053	AMEXG_0030090640	+	PGSH01048697.1
chr1	101.053	AMEXG_0030120298	+	PGSH01121899.1
chr1	101.053	AMEXG_0030007079	+	PGSH01096884.1
chr1	101.053	AMEXG_0030007451	+	PGSH01061692.1
chr1	101.053	AMEXG_0030001371	+	PGSH01086771.1
chr1	101.053	AMEXG_0030008261	+	PGSH01074270.1
chr1	101.053	AMEXG_0030009216	+	PGSH01017705.1
chr1	101.053	AMEXG_0030006010	+	PGSH01010125.1
chr1	101.053	AMEXG_0030100602	+	PGSH01001007.1
chr1	101.053	AMEXG_0030004972	+	PGSH01088064.1
chr1	101.053	AMEXG_0030029849	+	PGSH01059402.1
chr1	101.053	AMEXG_0030114311	+	PGSH01012466.1
chr1	101.053	AMEXG_0030125014	+	PGSH01016347.1
chr1	101.053	AMEXG_0030048418	+	PGSH01020613.1
chr1	101.053	AMEXG_0030103115	+	PGSH01017386.1
chr1	101.053	AMEXG_0030007623	+	PGSH01026495.1
chr1	101.053	AMEXG_0030058396	+	PGSH01118766.1
chr1	101.053	AMEXG_0030000142	+	PGSH01051563.1
chr1	101.053	AMEXG_0030004612	+	PGSH01012627.1
chr1	101.053	AMEXG_0030050638	+	PGSH01045783.1
chr1	101.053	AMEXG_0030002502	+	PGSH01000026.1
chr1	101.053	AMEXG_0030018690	+	PGSH01110827.1
chr1	101.053	AMEXG_0030083799	+	PGSH01122791.1
chr1	101.053	AMEXG_0030000127	+	PGSH01032708.1
chr1	101.053	AMEXG_0030083359	+	PGSH01072507.1
chr1	101.053	AMEXG_0030002640	+	PGSH01047817.1
chr1	101.053	AMEXG_0030087023	+	PGSH01027289.1
chr1	101.053	AMEXG_0030042376	+	PGSH01093466.1
chr1	105.404	AMEXG_0030006339	+	PGSH01046597.1
chr1	105.404	AMEXG_0030004451	+	PGSH01061662.1
chr1	107.532	AMEXG_0030001633	+	PGSH01039008.1
chr1	107.532	AMEXG_0030053211	+	PGSH01011855.1
chr1	107.532	AMEXG_0030000922	+	PGSH01026428.1
chr1	107.532	AMEXG_0030078883	+	PGSH01102630.1
chr1	107.532	AMEXG_0030002704	+	PGSH01002544.1
chr1	107.532	AMEXG_0030103514	+	PGSH01016132.1
chr1	107.532	AMEXG_0030007378	+	PGSH01095630.1
chr1	107.532	AMEXG_0030033097	+	PGSH01119770.1
chr1	107.532	AMEXG_0030003960	+	PGSH01072970.1
chr1	107.532	AMEXG_0030062127	+	PGSH01032071.1
chr1	107.532	AMEXG_0030034031	+	PGSH01036818.1
chr1	107.532	AMEXG_0030014739	+	PGSH01046681.1
chr1	107.532	AMEXG_0030123280	+	PGSH01099303.1
chr1	107.532	AMEXG_0030009488	+	PGSH01108221.1
chr1	107.532	AMEXG_0030002347	+	PGSH01056613.1
chr1	107.532	AMEXG_0030003508	+	PGSH01007584.1
chr1	107.532	AMEXG_0030011237	+	PGSH01044132.1
chr1	107.532	AMEXG_0030116011	+	PGSH01012483.1
chr1	107.532	AMEXG_0030007988	+	PGSH01108206.1
chr1	107.532	AMEXG_0030112396	+	PGSH01119306.1
chr1	107.532	AMEXG_0030097241	+	PGSH01050020.1
chr1	107.532	AMEXG_0030044045	+	PGSH01054516.1
chr1	107.532	AMEXG_0030091669	+	PGSH01085160.1
chr1	107.532	AMEXG_0030013384	+	PGSH01103232.1
chr1	107.532	AMEXG_0030084656	+	PGSH01068749.1
chr1	107.532	AMEXG_0030035264	+	PGSH01078311.1
chr1	107.532	AMEXG_0030007606	+	PGSH01005109.1
chr1	107.532	AMEXG_0030006366	+	PGSH01080536.1
chr1	107.532	AMEXG_0030079085	+	PGSH01105146.1
chr1	107.532	AMEXG_0030076071	+	PGSH01087518.1
chr1	107.532	AMEXG_0030087812	+	PGSH01013459.1
chr1	107.532	AMEXG_0030023648	+	PGSH01058083.1
chr1	107.532	AMEXG_0030005527	+	PGSH01031505.1
chr1	107.532	AMEXG_0030087268	+	PGSH01083859.1
chr1	109.66	AMEXG_0030007183	+	PGSH01101913.1
chr1	109.66	AMEXG_0030007732	+	PGSH01037812.1
chr1	109.66	AMEXG_0030003322	+	PGSH01025194.1
chr1	109.66	AMEXG_0030061299	+	PGSH01122566.1
chr1	109.66	AMEXG_0030065911	+	PGSH01011982.1
chr1	109.66	AMEXG_0030085662	+	PGSH01076301.1
chr1	109.66	AMEXG_0030113077	+	PGSH01095430.1
chr1	109.66	AMEXG_0030079000	+	PGSH01124000.1
chr1	109.66	AMEXG_0030008780	+	PGSH01098158.1
chr1	109.66	AMEXG_0030006227	+	PGSH01031512.1
chr1	109.66	AMEXG_0030002907	+	PGSH01006320.1
chr1	109.66	AMEXG_0030118294	+	PGSH01116851.1
chr1	109.66	AMEXG_0030039916	+	PGSH01018012.1
chr1	109.66	AMEXG_0030123593	+	PGSH01115647.1
chr1	109.66	AMEXG_0030009103	+	PGSH01001350.1
chr1	109.66	AMEXG_0030047517	+	PGSH01019346.1
chr1	109.66	AMEXG_0030041902	+	PGSH01000420.1
chr1	109.66	AMEXG_0030014220	+	PGSH01022787.1
chr1	109.66	AMEXG_0030018367	+	PGSH01081913.1
chr1	109.66	AMEXG_0030012596	+	PGSH01118308.1
chr1	109.66	AMEXG_0030001005	+	PGSH01005043.1
chr1	109.66	AMEXG_0030013227	+	PGSH01031582.1
chr1	111.788	AMEXG_0030036174	+	PGSH01090890.1
chr1	111.788	AMEXG_0030026117	+	PGSH01019132.1
chr1	111.788	AMEXG_0030084702	+	PGSH01000848.1
chr1	111.788	AMEXG_0030036582	+	PGSH01100950.1
chr1	111.788	AMEXG_0030085857	+	PGSH01070018.1
chr1	111.788	AMEXG_0030008245	+	PGSH01054158.1
chr1	111.788	AMEXG_0030013418	+	PGSH01020263.1
chr1	111.788	AMEXG_0030073540	+	PGSH01048526.1
chr1	111.788	AMEXG_0030109234	+	PGSH01041341.1
chr1	111.788	AMEXG_0030007023	+	PGSH01026489.1
chr1	111.788	AMEXG_0030008763	+	PGSH01076789.1
chr1	111.788	AMEXG_0030017852	+	PGSH01063053.1
chr1	111.788	AMEXG_0030001828	+	PGSH01032725.1
chr1	111.788	AMEXG_0030104995	+	PGSH01117975.1
chr1	111.788	AMEXG_0030090854	+	PGSH01066297.1
chr1	111.788	AMEXG_0030016863	+	PGSH01076870.1
chr1	111.788	AMEXG_0030005508	+	PGSH01007604.1
chr1	111.788	AMEXG_0030085088	+	PGSH01108977.1
chr1	111.788	AMEXG_0030005836	+	PGSH01042821.1
chr1	111.788	AMEXG_0030081526	+	PGSH01031008.1
chr1	111.788	AMEXG_0030011376	+	PGSH01093156.1
chr1	111.788	AMEXG_0030059402	+	PGSH01000595.1
chr1	111.788	AMEXG_0030105457	+	PGSH01070214.1
chr1	111.788	AMEXG_0030089350	+	PGSH01061254.1
chr1	111.788	AMEXG_0030080970	+	PGSH01086310.1
chr1	113.916	AMEXG_0030108815	+	PGSH01017443.1
chr1	113.916	AMEXG_0030003958	+	PGSH01070456.1
chr1	113.916	AMEXG_0030106257	+	PGSH01070222.1
chr1	113.916	AMEXG_0030015627	+	PGSH01031606.1
chr1	113.916	AMEXG_0030103025	+	PGSH01029965.1
chr1	113.916	AMEXG_0030001750	+	PGSH01060378.1
chr1	113.916	AMEXG_0030007544	+	PGSH01052894.1
chr1	113.916	AMEXG_0030016720	+	PGSH01022812.1
chr1	113.916	AMEXG_0030094126	+	PGSH01031134.1
chr1	113.916	AMEXG_0030026785	+	PGSH01104623.1
chr1	113.916	AMEXG_0030108742	+	PGSH01051392.1
chr1	113.916	AMEXG_0030019631	+	PGSH01036674.1
chr1	113.916	AMEXG_0030044729	+	PGSH01034411.1
chr1	113.916	AMEXG_0030118913	+	PGSH01015028.1
chr1	113.916	AMEXG_0030110702	+	PGSH01001108.1
chr1	113.916	AMEXG_0030073363	+	PGSH01077435.1
chr1	113.916	AMEXG_0030074781	+	PGSH01100075.1
chr1	113.916	AMEXG_0030117049	+	PGSH01060274.1
chr1	113.916	AMEXG_0030060488	+	PGSH01108731.1
chr1	113.916	AMEXG_0030044335	+	PGSH01041949.1
chr1	113.916	AMEXG_0030088487	+	PGSH01107754.1
chr1	113.916	AMEXG_0030072405	+	PGSH01004499.1
chr1	113.916	AMEXG_0030004763	+	PGSH01076749.1
chr1	113.916	AMEXG_0030009369	+	PGSH01084337.1
chr1	113.916	AMEXG_0030069503	+	PGSH01001954.1
chr1	113.916	AMEXG_0030008950	+	PGSH01060450.1
chr1	113.916	AMEXG_0030005892	+	PGSH01113213.1
chr1	113.916	AMEXG_0030005325	+	PGSH01028988.1
chr1	113.916	AMEXG_0030099032	+	PGSH01038725.1
chr1	113.916	AMEXG_0030095879	+	PGSH01097772.1
chr1	113.916	AMEXG_0030015123	+	PGSH01026570.1
chr1	113.916	AMEXG_0030030307	+	PGSH01006594.1
chr1	113.916	AMEXG_0030011497	+	PGSH01119554.1
chr1	113.916	AMEXG_0030009769	+	PGSH01084341.1
chr1	113.916	AMEXG_0030009639	+	PGSH01046630.1
chr1	113.916	AMEXG_0030035867	+	PGSH01082088.1
chr1	113.916	AMEXG_0030012935	+	PGSH01041635.1
chr1	113.916	AMEXG_0030118605	+	PGSH01004961.1
chr1	113.916	AMEXG_0030110256	+	PGSH01069005.1
chr1	113.916	AMEXG_0030049824	+	PGSH01028175.1
chr1	116.044	AMEXG_0030060691	+	PGSH01112504.1
chr1	116.044	AMEXG_0030123569	+	PGSH01085479.1
chr1	116.044	AMEXG_0030068781	+	PGSH01100015.1
chr1	116.044	AMEXG_0030116201	+	PGSH01125629.1
chr1	116.044	AMEXG_0030111747	+	PGSH01057707.1
chr1	116.044	AMEXG_0030054938	+	PGSH01045826.1
chr1	116.044	AMEXG_0030002215	+	PGSH01016377.1
chr1	116.044	AMEXG_0030051242	+	PGSH01050817.1
chr1	116.044	AMEXG_0030120544	+	PGSH01054024.1
chr1	116.044	AMEXG_0030047514	+	PGSH01015572.1
chr1	116.044	AMEXG_0030038288	+	PGSH01108509.1
chr1	116.044	AMEXG_0030070703	+	PGSH01001966.1
chr1	116.044	AMEXG_0030072864	+	PGSH01078687.1
chr1	116.044	AMEXG_0030059331	+	PGSH01037071.1
chr1	116.044	AMEXG_0030013671	+	PGSH01086894.1
chr1	116.044	AMEXG_0030013182	+	PGSH01100716.1
chr1	116.044	AMEXG_0030015717	+	PGSH01019028.1
chr1	116.044	AMEXG_0030059053	+	PGSH01064722.1
chr1	116.044	AMEXG_0030003390	+	PGSH01110674.1
chr1	116.044	AMEXG_0030109195	+	PGSH01118017.1
chr1	116.044	AMEXG_0030092906	+	PGSH01005962.1
chr1	116.044	AMEXG_0030095940	+	PGSH01048750.1
chr1	116.044	AMEXG_0030101894	+	PGSH01116687.1
chr1	116.044	AMEXG_0030001994	+	PGSH01115688.1
chr1	116.044	AMEXG_0030001859	+	PGSH01071692.1
chr1	116.044	AMEXG_0030104663	+	PGSH01077748.1
chr1	116.044	AMEXG_0030082742	+	PGSH01051132.1
chr1	116.044	AMEXG_0030000684	+	PGSH01104362.1
chr1	116.044	AMEXG_0030106947	+	PGSH01057659.1
chr1	116.044	AMEXG_0030005411	+	PGSH01011377.1
chr1	116.044	AMEXG_0030008006	+	PGSH01005113.1
chr1	116.044	AMEXG_0030056576	+	PGSH01093608.1
chr1	116.044	AMEXG_0030119159	+	PGSH01072865.1
chr1	116.044	AMEXG_0030002239	+	PGSH01046556.1
chr1	116.044	AMEXG_0030118810	+	PGSH01011253.1
chr1	116.044	AMEXG_0030083614	+	PGSH01015933.1
chr1	116.044	AMEXG_0030087531	+	PGSH01037353.1
chr1	116.044	AMEXG_0030079273	+	PGSH01090064.1
chr1	116.044	AMEXG_0030111116	+	PGSH01018724.1
chr1	116.044	AMEXG_0030111066	+	PGSH01081583.1
chr1	116.044	AMEXG_0030006591	+	PGSH01111963.1
chr1	116.044	AMEXG_0030008185	+	PGSH01104437.1
chr1	116.044	AMEXG_0030006475	+	PGSH01091850.1
chr1	116.044	AMEXG_0030005934	+	PGSH01040308.1
chr1	116.044	AMEXG_0030005526	+	PGSH01030248.1
chr1	116.044	AMEXG_0030005655	+	PGSH01066702.1
chr1	116.044	AMEXG_0030000566	+	PGSH01081735.1
chr1	116.044	AMEXG_0030120666	+	PGSH01081679.1
chr1	116.044	AMEXG_0030089251	+	PGSH01062510.1
chr1	116.044	AMEXG_0030121805	+	PGSH01004993.1
chr1	116.044	AMEXG_0030010209	+	PGSH01008909.1
chr1	116.044	AMEXG_0030008814	+	PGSH01015185.1
chr1	116.044	AMEXG_0030009088	+	PGSH01108217.1
chr1	116.044	AMEXG_0030011908	+	PGSH01007668.1
chr1	116.044	AMEXG_0030012063	+	PGSH01076822.1
chr1	116.044	AMEXG_0030010330	+	PGSH01035324.1
chr1	116.044	AMEXG_0030023262	+	PGSH01075677.1
chr1	116.044	AMEXG_0030108163	+	PGSH01077783.1
chr1	116.044	AMEXG_0030008109	+	PGSH01008888.1
chr1	116.044	AMEXG_0030099677	+	PGSH01095296.1
chr1	116.044	AMEXG_0030101636	+	PGSH01043779.1
chr1	116.044	AMEXG_0030061079	+	PGSH01097424.1
chr1	116.044	AMEXG_0030060369	+	PGSH01084847.1
chr1	118.172	AMEXG_0030076998	+	PGSH01121466.1
chr1	118.172	AMEXG_0030014811	+	PGSH01011471.1
chr1	118.172	AMEXG_0030082459	+	PGSH01072498.1
chr1	118.172	AMEXG_0030085803	+	PGSH01002117.1
chr1	118.172	AMEXG_0030050981	+	PGSH01099837.1
chr1	118.172	AMEXG_0030003205	+	PGSH01003807.1
chr1	118.172	AMEXG_0030092447	+	PGSH01057514.1
chr1	118.172	AMEXG_0030010973	+	PGSH01089381.1
chr1	118.172	AMEXG_0030091396	+	PGSH01119096.1
chr1	118.172	AMEXG_0030103790	+	PGSH01111678.1
chr1	118.172	AMEXG_0030046608	+	PGSH01008015.1
chr1	118.172	AMEXG_0030102756	+	PGSH01068930.1
chr1	118.172	AMEXG_0030004951	+	PGSH01061667.1
chr1	118.172	AMEXG_0030031598	+	PGSH01121012.1
chr1	118.172	AMEXG_0030009763	+	PGSH01076799.1
chr1	118.172	AMEXG_0030018350	+	PGSH01060544.1
chr1	118.172	AMEXG_0030004617	+	PGSH01018917.1
chr1	118.172	AMEXG_0030084124	+	PGSH01028518.1
chr1	118.172	AMEXG_0030091737	+	PGSH01044937.1
chr1	118.172	AMEXG_0030037814	+	PGSH01015475.1
chr1	118.172	AMEXG_0030104452	+	PGSH01063919.1
chr1	118.172	AMEXG_0030108305	+	PGSH01004858.1
chr1	118.172	AMEXG_0030045941	+	PGSH01049507.1
chr1	118.172	AMEXG_0030009725	+	PGSH01029032.1
chr1	118.172	AMEXG_0030016657	+	PGSH01069326.1
chr1	118.172	AMEXG_0030007065	+	PGSH01079286.1
chr1	118.172	AMEXG_0030000043	+	PGSH01052819.1
chr1	118.172	AMEXG_0030010486	+	PGSH01105717.1
chr1	118.172	AMEXG_0030003311	+	PGSH01011356.1
chr1	118.172	AMEXG_0030004439	+	PGSH01046578.1
chr1	118.172	AMEXG_0030007450	+	PGSH01060435.1
chr1	118.172	AMEXG_0030006419	+	PGSH01021451.1
chr1	118.172	AMEXG_0030091459	+	PGSH01072588.1
chr1	118.172	AMEXG_0030009878	+	PGSH01095655.1
chr1	118.172	AMEXG_0030116884	+	PGSH01104267.1
chr1	118.172	AMEXG_0030058128	+	PGSH01033288.1
chr1	118.172	AMEXG_0030066082	+	PGSH01101245.1
chr1	118.172	AMEXG_0030034813	+	PGSH01014187.1
chr1	118.172	AMEXG_0030122098	+	PGSH01121917.1
chr1	118.172	AMEXG_0030010097	+	PGSH01119540.1
chr1	118.172	AMEXG_0030007265	+	PGSH01079288.1
chr1	118.172	AMEXG_0030109856	+	PGSH01069001.1
chr1	118.172	AMEXG_0030010282	+	PGSH01100687.1
chr1	120.3	AMEXG_0030009448	+	PGSH01057941.1
chr1	120.3	AMEXG_0030011515	+	PGSH01016470.1
chr1	120.3	AMEXG_0030003359	+	PGSH01071707.1
chr1	120.3	AMEXG_0030013417	+	PGSH01019005.1
chr1	120.3	AMEXG_0030002764	+	PGSH01077986.1
chr1	120.3	AMEXG_0030014726	+	PGSH01030340.1
chr1	120.3	AMEXG_0030002627	+	PGSH01031476.1
chr1	120.3	AMEXG_0030013261	+	PGSH01074320.1
chr1	120.3	AMEXG_0030124092	+	PGSH01114395.1
chr1	120.3	AMEXG_0030051759	+	PGSH01072191.1
chr1	120.3	AMEXG_0030003345	+	PGSH01054109.1
chr1	120.3	AMEXG_0030000040	+	PGSH01049048.1
chr1	120.3	AMEXG_0030000719	+	PGSH01022652.1
chr1	120.3	AMEXG_0030002632	+	PGSH01037761.1
chr1	120.3	AMEXG_0030070805	+	PGSH01004483.1
chr1	120.3	AMEXG_0030029749	+	PGSH01059401.1
chr1	120.3	AMEXG_0030013708	+	PGSH01007686.1
chr1	120.3	AMEXG_0030006920	+	PGSH01022714.1
chr1	120.3	AMEXG_0030112795	+	PGSH01118053.1
chr1	120.3	AMEXG_0030108121	+	PGSH01024984.1
chr1	120.3	AMEXG_0030006873	+	PGSH01089340.1
chr1	120.3	AMEXG_0030006658	+	PGSH01070483.1
chr1	120.3	AMEXG_0030002642	+	PGSH01050331.1
chr1	120.3	AMEXG_0030123571	+	PGSH01087993.1
chr1	120.3	AMEXG_0030008246	+	PGSH01055415.1
chr1	120.3	AMEXG_0030059687	+	PGSH01107466.1
chr1	120.3	AMEXG_0030068414	+	PGSH01015781.1
chr1	120.3	AMEXG_0030003382	+	PGSH01100618.1
chr1	120.3	AMEXG_0030004445	+	PGSH01054120.1
chr1	120.3	AMEXG_0030006958	+	PGSH01070486.1
chr1	120.3	AMEXG_0030006248	+	PGSH01057909.1
chr1	120.3	AMEXG_0030004874	+	PGSH01090577.1
chr1	120.3	AMEXG_0030000063	+	PGSH01077959.1
chr1	120.3	AMEXG_0030001368	+	PGSH01083000.1
chr1	120.3	AMEXG_0030099422	+	PGSH01026155.1
chr1	120.3	AMEXG_0030073247	+	PGSH01057322.1
chr1	120.3	AMEXG_0030122407	+	PGSH01007515.1
chr1	122.428	AMEXG_0030006280	+	PGSH01098133.1
chr1	122.428	AMEXG_0030096505	+	PGSH01004740.1
chr1	122.428	AMEXG_0030108859	+	PGSH01072762.1
chr1	122.428	AMEXG_0030089243	+	PGSH01052454.1
chr1	122.428	AMEXG_0030069134	+	PGSH01040940.1
chr1	122.428	AMEXG_0030065148	+	PGSH01058498.1
chr1	122.428	AMEXG_0030023682	+	PGSH01100821.1
chr1	122.428	AMEXG_0030006679	+	PGSH01096880.1
chr1	122.428	AMEXG_0030009952	+	PGSH01062974.1
chr1	122.428	AMEXG_0030107372	+	PGSH01089088.1
chr1	122.428	AMEXG_0030094167	+	PGSH01082671.1
chr1	122.428	AMEXG_0030119134	+	PGSH01041440.1
chr1	122.428	AMEXG_0030076745	+	PGSH01054843.1
chr1	122.428	AMEXG_0030007453	+	PGSH01064206.1
chr1	129.104	AMEXG_0030001313	+	PGSH01015110.1
chr1	129.104	AMEXG_0030064266	+	PGSH01081115.1
chr1	129.104	AMEXG_0030039193	+	PGSH01114803.1
chr1	129.104	AMEXG_0030070226	+	PGSH01030895.1
chr1	133.455	AMEXG_0030123428	+	PGSH01033941.1
chr1	133.455	AMEXG_0030072391	+	PGSH01112621.1
chr1	133.455	AMEXG_0030067658	+	PGSH01071093.1
chr1	133.455	AMEXG_0030118239	+	PGSH01047716.1
chr1	133.455	AMEXG_0030019669	+	PGSH01084440.1
chr1	133.455	AMEXG_0030000938	+	PGSH01046543.1
chr1	133.455	AMEXG_0030007393	+	PGSH01114485.1
chr1	133.455	AMEXG_0030114705	+	PGSH01004922.1
chr1	133.455	AMEXG_0030065264	+	PGSH01078611.1
chr1	133.455	AMEXG_0030001992	+	PGSH01113174.1
chr1	133.455	AMEXG_0030010171	+	PGSH01086859.1
chr1	133.455	AMEXG_0030096920	+	PGSH01023614.1
chr1	133.455	AMEXG_0030048192	+	PGSH01113636.1
chr1	133.455	AMEXG_0030004148	+	PGSH01057888.1
chr1	133.455	AMEXG_0030004219	+	PGSH01021429.1
chr1	133.455	AMEXG_0030005451	+	PGSH01061672.1
chr1	133.455	AMEXG_0030105982	+	PGSH01101644.1
chr1	133.455	AMEXG_0030080430	+	PGSH01036025.1
chr1	133.455	AMEXG_0030007392	+	PGSH01113228.1
chr1	135.583	AMEXG_0030000536	+	PGSH01044025.1
chr1	135.583	AMEXG_0030010546	+	PGSH01055438.1
chr1	135.583	AMEXG_0030002649	+	PGSH01059130.1
chr1	137.711	AMEXG_0030041524	+	PGSH01028092.1
chr1	137.711	AMEXG_0030060365	+	PGSH01079819.1
chr1	137.711	AMEXG_0030078803	+	PGSH01002047.1
chr1	137.711	AMEXG_0030004988	+	PGSH01108176.1
chr1	137.711	AMEXG_0030000161	+	PGSH01075446.1
chr1	137.711	AMEXG_0030089990	+	PGSH01111540.1
chr1	137.711	AMEXG_0030029078	+	PGSH01095847.1
chr1	137.711	AMEXG_0030108329	+	PGSH01035047.1
chr1	137.711	AMEXG_0030015987	+	PGSH01107029.1
chr1	137.711	AMEXG_0030005257	+	PGSH01069212.1
chr1	137.711	AMEXG_0030030759	+	PGSH01071981.1
chr1	137.711	AMEXG_0030007141	+	PGSH01049119.1
chr1	137.711	AMEXG_0030062322	+	PGSH01025784.1
chr1	137.711	AMEXG_0030002096	+	PGSH01118203.1
chr1	137.711	AMEXG_0030109893	+	PGSH01115510.1
chr1	142.061	AMEXG_0030041475	+	PGSH01092200.1
chr1	142.061	AMEXG_0030021381	+	PGSH01099541.1
chr1	142.061	AMEXG_0030000437	+	PGSH01045281.1
chr1	142.061	AMEXG_0030001118	+	PGSH01021398.1
chr1	142.061	AMEXG_0030069833	+	PGSH01039690.1
chr1	142.061	AMEXG_0030012625	+	PGSH01029061.1
chr1	142.061	AMEXG_0030056019	+	PGSH01021947.1
chr1	142.061	AMEXG_0030027799	+	PGSH01122231.1
chr1	142.061	AMEXG_0030077437	+	PGSH01044794.1
chr1	142.061	AMEXG_0030098688	+	PGSH01109113.1
chr1	142.061	AMEXG_0030014703	+	PGSH01001406.1
chr1	142.061	AMEXG_0030119900	+	PGSH01124409.1
chr1	142.061	AMEXG_0030057838	+	PGSH01045855.1
chr1	144.189	AMEXG_0030001431	+	PGSH01036492.1
chr1	144.189	AMEXG_0030038245	+	PGSH01054458.1
chr1	146.317	AMEXG_0030004109	+	PGSH01008848.1
chr1	146.317	AMEXG_0030000440	+	PGSH01049052.1
chr1	146.317	AMEXG_0030002748	+	PGSH01057874.1
chr1	146.317	AMEXG_0030029126	+	PGSH01030484.1
chr1	146.317	AMEXG_0030078992	+	PGSH01113944.1
chr1	146.317	AMEXG_0030003505	+	PGSH01003810.1
chr1	146.317	AMEXG_0030054956	+	PGSH01068452.1
chr1	146.317	AMEXG_0030003746	+	PGSH01055370.1
chr1	148.445	AMEXG_0030013206	+	PGSH01005165.1
chr1	148.445	AMEXG_0030019239	+	PGSH01046726.1
chr1	148.445	AMEXG_0030004727	+	PGSH01031497.1
chr1	148.445	AMEXG_0030099775	+	PGSH01092783.1
chr1	148.445	AMEXG_0030087201	+	PGSH01125339.1
chr1	148.445	AMEXG_0030051816	+	PGSH01018131.1
chr1	150.573	AMEXG_0030013326	+	PGSH01030326.1
chr1	150.573	AMEXG_0030037969	+	PGSH01084623.1
chr1	150.573	AMEXG_0030087343	+	PGSH01052435.1
chr1	152.701	AMEXG_0030018804	+	PGSH01002705.1
chr1	152.701	AMEXG_0030104816	+	PGSH01018661.1
chr1	152.701	AMEXG_0030005615	+	PGSH01016411.1
chr1	152.701	AMEXG_0030062846	+	PGSH01055961.1
chr1	152.701	AMEXG_0030006496	+	PGSH01118247.1
chr1	152.701	AMEXG_0030117653	+	PGSH01065308.1
chr1	152.701	AMEXG_0030066842	+	PGSH01050973.1
chr1	152.701	AMEXG_0030012773	+	PGSH01089399.1
chr1	152.701	AMEXG_0030000401	+	PGSH01000005.1
chr1	152.701	AMEXG_0030116015	+	PGSH01017515.1
chr1	152.701	AMEXG_0030027131	+	PGSH01036749.1
chr1	152.701	AMEXG_0030013338	+	PGSH01045410.1
chr1	152.701	AMEXG_0030090428	+	PGSH01033611.1
chr1	152.701	AMEXG_0030041332	+	PGSH01038148.1
chr1	152.701	AMEXG_0030007169	+	PGSH01084315.1
chr1	152.701	AMEXG_0030001052	+	PGSH01064142.1
chr1	152.701	AMEXG_0030008887	+	PGSH01106958.1
chr1	152.701	AMEXG_0030038111	+	PGSH01011704.1
chr1	154.829	AMEXG_0030005902	+	PGSH01000060.1
chr1	154.829	AMEXG_0030020811	+	PGSH01011531.1
chr1	154.829	AMEXG_0030119452	+	PGSH01064069.1
chr1	154.829	AMEXG_0030062202	+	PGSH01000623.1
chr1	154.829	AMEXG_0030110970	+	PGSH01086610.1
chr1	154.829	AMEXG_0030047821	+	PGSH01024381.1
chr1	154.829	AMEXG_0030047174	+	PGSH01091000.1
chr1	154.829	AMEXG_0030002978	+	PGSH01095586.1
chr1	154.829	AMEXG_0030000184	+	PGSH01104357.1
chr1	154.829	AMEXG_0030084271	+	PGSH01087600.1
chr1	154.829	AMEXG_0030001575	+	PGSH01091801.1
chr1	154.829	AMEXG_0030049704	+	PGSH01003014.1
chr1	154.829	AMEXG_0030043349	+	PGSH01059537.1
chr1	154.829	AMEXG_0030011755	+	PGSH01066763.1
chr1	154.829	AMEXG_0030065577	+	PGSH01094955.1
chr1	154.829	AMEXG_0030006863	+	PGSH01076770.1
chr1	154.829	AMEXG_0030003652	+	PGSH01062911.1
chr1	154.829	AMEXG_0030017321	+	PGSH01024076.1
chr1	154.829	AMEXG_0030031493	+	PGSH01114726.1
chr1	154.829	AMEXG_0030116192	+	PGSH01114316.1
chr1	154.829	AMEXG_0030005132	+	PGSH01037786.1
chr1	154.829	AMEXG_0030002452	+	PGSH01062899.1
chr1	154.829	AMEXG_0030002563	+	PGSH01076727.1
chr1	154.829	AMEXG_0030020413	+	PGSH01014043.1
chr1	154.829	AMEXG_0030016882	+	PGSH01100753.1
chr1	154.829	AMEXG_0030003885	+	PGSH01104394.1
chr1	154.829	AMEXG_0030093003	+	PGSH01002189.1
chr1	156.957	AMEXG_0030081310	+	PGSH01010878.1
chr1	156.957	AMEXG_0030081630	+	PGSH01036037.1
chr1	156.957	AMEXG_0030096292	+	PGSH01114117.1
chr1	156.957	AMEXG_0030057600	+	PGSH01123786.1
chr1	156.957	AMEXG_0030009912	+	PGSH01012680.1
chr1	156.957	AMEXG_0030015605	+	PGSH01003931.1
chr1	156.957	AMEXG_0030020453	+	PGSH01064336.1
chr1	156.957	AMEXG_0030012885	+	PGSH01104484.1
chr1	156.957	AMEXG_0030054417	+	PGSH01019415.1
chr1	156.957	AMEXG_0030058678	+	PGSH01096143.1
chr1	156.957	AMEXG_0030115728	+	PGSH01033864.1
chr1	157.957	AMEXG_0030001261	+	PGSH01075457.1
chr1	159.063	AMEXG_0030014376	+	PGSH01093186.1
chr1	159.063	AMEXG_0030090274	+	PGSH01091431.1
chr1	159.063	AMEXG_0030002473	+	PGSH01089296.1
chr1	159.063	AMEXG_0030009876	+	PGSH01093141.1
chr1	159.063	AMEXG_0030014536	+	PGSH01042908.1
chr1	159.063	AMEXG_0030017268	+	PGSH01083159.1
chr1	168.279	AMEXG_0030002379	+	PGSH01096837.1
chr1	177.495	AMEXG_0030052409	+	PGSH01009331.1
chr1	177.495	AMEXG_0030000641	+	PGSH01050311.1
chr1	177.495	AMEXG_0030114886	+	PGSH01106761.1
chr1	177.495	AMEXG_0030037006	+	PGSH01005403.1
chr1	177.495	AMEXG_0030031091	+	PGSH01112208.1
chr1	177.495	AMEXG_0030002889	+	PGSH01109412.1
chr1	177.495	AMEXG_0030000665	+	PGSH01080479.1
chr1	177.495	AMEXG_0030033891	+	PGSH01112236.1
chr1	177.495	AMEXG_0030099321	+	PGSH01024896.1
chr1	181.845	AMEXG_0030079213	+	PGSH01014631.1
chr1	181.845	AMEXG_0030003742	+	PGSH01050342.1
chr1	181.845	AMEXG_0030029224	+	PGSH01027969.1
chr1	181.845	AMEXG_0030008421	+	PGSH01023987.1
chr1	181.845	AMEXG_0030093853	+	PGSH01065070.1
chr1	181.845	AMEXG_0030053834	+	PGSH01040787.1
chr1	183.973	AMEXG_0030075132	+	PGSH01038486.1
chr1	183.973	AMEXG_0030069113	+	PGSH01014530.1
chr1	183.973	AMEXG_0030002557	+	PGSH01069185.1
chr1	183.973	AMEXG_0030009678	+	PGSH01095653.1
chr1	183.973	AMEXG_0030002665	+	PGSH01079242.1
chr1	183.973	AMEXG_0030005285	+	PGSH01104408.1
chr1	183.973	AMEXG_0030008724	+	PGSH01027764.1
chr1	183.973	AMEXG_0030000830	+	PGSH01036486.1
chr1	183.973	AMEXG_0030067117	+	PGSH01019542.1
chr1	183.973	AMEXG_0030040448	+	PGSH01058251.1
chr1	183.973	AMEXG_0030110611	+	PGSH01012429.1
chr1	183.973	AMEXG_0030104645	+	PGSH01055122.1
chr1	183.973	AMEXG_0030070446	+	PGSH01056037.1
chr1	183.973	AMEXG_0030068542	+	PGSH01050990.1
chr1	183.973	AMEXG_0030026629	+	PGSH01034230.1
chr1	183.973	AMEXG_0030000460	+	PGSH01074192.1
chr1	183.973	AMEXG_0030037081	+	PGSH01099698.1
chr1	183.973	AMEXG_0030082394	+	PGSH01116492.1
chr1	183.973	AMEXG_0030070416	+	PGSH01018317.1
chr1	183.973	AMEXG_0030007626	+	PGSH01030269.1
chr1	183.973	AMEXG_0030030852	+	PGSH01063183.1
chr1	183.973	AMEXG_0030037179	+	PGSH01097185.1
chr1	183.973	AMEXG_0030047275	+	PGSH01092258.1
chr1	183.973	AMEXG_0030122861	+	PGSH01075416.1
chr1	186.101	AMEXG_0030023186	+	PGSH01105844.1
chr1	186.101	AMEXG_0030040680	+	PGSH01098477.1
chr1	186.101	AMEXG_0030049762	+	PGSH01075942.1
chr1	186.101	AMEXG_0030001823	+	PGSH01026437.1
chr1	195.293	AMEXG_0030067516	+	PGSH01018288.1
chr1	195.293	AMEXG_0030010198	+	PGSH01120798.1
chr1	202.041	AMEXG_0030058287	+	PGSH01107452.1
chr1	202.041	AMEXG_0030074832	+	PGSH01038483.1
chr1	202.041	AMEXG_0030008432	+	PGSH01037819.1
chr1	202.041	AMEXG_0030122450	+	PGSH01061585.1
chr1	202.041	AMEXG_0030035901	+	PGSH01124826.1
chr1	202.041	AMEXG_0030002116	+	PGSH01017634.1
chr1	202.041	AMEXG_0030081443	+	PGSH01052376.1
chr1	202.041	AMEXG_0030064785	+	PGSH01105003.1
chr1	202.041	AMEXG_0030073489	+	PGSH01110118.1
chr1	202.041	AMEXG_0030104137	+	PGSH01045061.1
chr1	202.041	AMEXG_0030094170	+	PGSH01086442.1
chr1	202.041	AMEXG_0030033894	+	PGSH01116007.1
chr1	202.041	AMEXG_0030007915	+	PGSH01016434.1
chr1	202.041	AMEXG_0030002184	+	PGSH01103120.1
chr1	202.041	AMEXG_0030095034	+	PGSH01041199.1
chr1	202.041	AMEXG_0030086075	+	PGSH01092646.1
chr1	202.041	AMEXG_0030105218	+	PGSH01021181.1
chr1	202.041	AMEXG_0030012679	+	PGSH01096940.1
chr1	202.041	AMEXG_0030065420	+	PGSH01023299.1
chr1	202.041	AMEXG_0030006953	+	PGSH01064201.1
chr1	202.041	AMEXG_0030005422	+	PGSH01025215.1
chr1	202.041	AMEXG_0030091750	+	PGSH01061278.1
chr1	202.041	AMEXG_0030010991	+	PGSH01112007.1
chr1	202.041	AMEXG_0030000364	+	PGSH01079219.1
chr1	202.041	AMEXG_0030002095	+	PGSH01116946.1
chr1	202.041	AMEXG_0030112496	+	PGSH01119307.1
chr1	202.041	AMEXG_0030016137	+	PGSH01044181.1
chr1	202.041	AMEXG_0030016320	+	PGSH01022808.1
chr1	202.041	AMEXG_0030122056	+	PGSH01069123.1
chr1	202.041	AMEXG_0030093969	+	PGSH01085183.1
chr1	202.041	AMEXG_0030001687	+	PGSH01106886.1
chr1	202.041	AMEXG_0030106075	+	PGSH01092846.1
chr1	202.041	AMEXG_0030004010	+	PGSH01010105.1
chr1	202.041	AMEXG_0030023783	+	PGSH01102079.1
chr1	202.041	AMEXG_0030002939	+	PGSH01046563.1
chr1	202.041	AMEXG_0030117372	+	PGSH01089188.1
chr1	202.041	AMEXG_0030000581	+	PGSH01100590.1
chr1	202.041	AMEXG_0030029184	+	PGSH01103390.1
chr1	204.169	AMEXG_0030071341	+	PGSH01049761.1
chr1	204.169	AMEXG_0030011582	+	PGSH01100700.1
chr1	204.169	AMEXG_0030094164	+	PGSH01078900.1
chr1	204.169	AMEXG_0030011805	+	PGSH01003893.1
chr1	204.169	AMEXG_0030032530	+	PGSH01035546.1
chr1	204.169	AMEXG_0030050126	+	PGSH01030694.1
chr1	204.169	AMEXG_0030006578	+	PGSH01095622.1
chr1	204.169	AMEXG_0030031256	+	PGSH01068215.1
chr1	204.169	AMEXG_0030004246	+	PGSH01055375.1
chr1	204.169	AMEXG_0030014154	+	PGSH01065530.1
chr1	204.169	AMEXG_0030003496	+	PGSH01118217.1
chr1	204.169	AMEXG_0030004485	+	PGSH01104400.1
chr1	204.169	AMEXG_0030084677	+	PGSH01095146.1
chr1	206.297	AMEXG_0030037840	+	PGSH01048169.1
chr1	206.297	AMEXG_0030042595	+	PGSH01117351.1
chr1	206.297	AMEXG_0030002381	+	PGSH01099351.1
chr1	206.297	AMEXG_0030000244	+	PGSH01054078.1
chr1	206.297	AMEXG_0030016667	+	PGSH01081896.1
chr1	206.297	AMEXG_0030089774	+	PGSH01091426.1
chr1	206.297	AMEXG_0030009593	+	PGSH01114507.1
chr1	206.297	AMEXG_0030049584	+	PGSH01103594.1
chr1	206.297	AMEXG_0030000749	+	PGSH01060368.1
chr1	206.297	AMEXG_0030062459	+	PGSH01072298.1
chr1	206.297	AMEXG_0030104957	+	PGSH01070209.1
chr1	206.297	AMEXG_0030014434	+	PGSH01040393.1
chr1	206.297	AMEXG_0030014928	+	PGSH01032856.1
chr1	206.297	AMEXG_0030107212	+	PGSH01013653.1
chr1	206.297	AMEXG_0030013587	+	PGSH01107005.1
chr1	206.297	AMEXG_0030006109	+	PGSH01008868.1
chr1	206.297	AMEXG_0030087743	+	PGSH01052439.1
chr1	214.129	AMEXG_0030009969	+	PGSH01084343.1
chr1	214.129	AMEXG_0030103624	+	PGSH01028713.1
chr1	222.206	AMEXG_0030031997	+	PGSH01119759.1
chr1	222.206	AMEXG_0030014057	+	PGSH01069300.1
chr1	222.206	AMEXG_0030049577	+	PGSH01094795.1
chr1	222.206	AMEXG_0030045679	+	PGSH01097270.1
chr1	222.206	AMEXG_0030045252	+	PGSH01063327.1
chr1	222.206	AMEXG_0030000381	+	PGSH01100588.1
chr1	222.206	AMEXG_0030029134	+	PGSH01040540.1
chr1	222.206	AMEXG_0030012825	+	PGSH01029063.1
chr1	222.206	AMEXG_0030048348	+	PGSH01058330.1
chr1	222.206	AMEXG_0030113803	+	PGSH01002397.1
chr1	222.206	AMEXG_0030118197	+	PGSH01120621.1
chr1	222.206	AMEXG_0030118189	+	PGSH01110565.1
chr1	222.206	AMEXG_0030114364	+	PGSH01079102.1
chr1	222.206	AMEXG_0030114235	+	PGSH01042648.1
chr1	222.206	AMEXG_0030007849	+	PGSH01059182.1
chr1	222.206	AMEXG_0030014736	+	PGSH01042910.1
chr1	222.206	AMEXG_0030073858	+	PGSH01071155.1
chr1	222.206	AMEXG_0030040337	+	PGSH01044423.1
chr1	222.206	AMEXG_0030011702	+	PGSH01000118.1
chr1	222.206	AMEXG_0030103647	+	PGSH01057626.1
chr1	222.206	AMEXG_0030006789	+	PGSH01109451.1
chr1	222.206	AMEXG_0030072489	+	PGSH01110108.1
chr1	222.206	AMEXG_0030089709	+	PGSH01009704.1
chr1	222.206	AMEXG_0030091430	+	PGSH01036135.1
chr1	222.206	AMEXG_0030033777	+	PGSH01094637.1
chr1	222.206	AMEXG_0030004677	+	PGSH01094346.1
chr1	222.206	AMEXG_0030007814	+	PGSH01015175.1
chr1	222.206	AMEXG_0030039674	+	PGSH01090925.1
chr1	222.206	AMEXG_0030065110	+	PGSH01010716.1
chr1	222.206	AMEXG_0030051537	+	PGSH01044535.1
chr1	222.206	AMEXG_0030086378	+	PGSH01096420.1
chr1	222.206	AMEXG_0030005975	+	PGSH01091845.1
chr1	222.206	AMEXG_0030081775	+	PGSH01092603.1
chr1	222.206	AMEXG_0030003080	+	PGSH01098101.1
chr1	222.206	AMEXG_0030006408	+	PGSH01007613.1
chr1	222.206	AMEXG_0030106535	+	PGSH01042571.1
chr1	222.206	AMEXG_0030096953	+	PGSH01065101.1
chr1	222.206	AMEXG_0030007354	+	PGSH01065462.1
chr1	222.206	AMEXG_0030003691	+	PGSH01111934.1
chr1	222.206	AMEXG_0030065139	+	PGSH01047185.1
chr1	222.206	AMEXG_0030112166	+	PGSH01081594.1
chr1	222.206	AMEXG_0030005897	+	PGSH01119498.1
chr1	222.206	AMEXG_0030012333	+	PGSH01039115.1
chr1	222.206	AMEXG_0030011617	+	PGSH01018987.1
chr1	222.206	AMEXG_0030008794	+	PGSH01115756.1
chr1	222.206	AMEXG_0030009512	+	PGSH01012676.1
chr1	222.206	AMEXG_0030002755	+	PGSH01066673.1
chr1	222.206	AMEXG_0030060765	+	PGSH01079823.1
chr1	222.206	AMEXG_0030029631	+	PGSH01036774.1
chr1	222.206	AMEXG_0030008648	+	PGSH01057933.1
chr1	222.206	AMEXG_0030076832	+	PGSH01038503.1
chr1	222.206	AMEXG_0030074155	+	PGSH01067387.1
chr1	222.206	AMEXG_0030006785	+	PGSH01104423.1
chr1	222.206	AMEXG_0030006431	+	PGSH01036542.1
chr1	222.206	AMEXG_0030012470	+	PGSH01085625.1
chr1	222.206	AMEXG_0030014522	+	PGSH01025306.1
chr1	222.206	AMEXG_0030029793	+	PGSH01114709.1
chr1	224.334	AMEXG_0030071507	+	PGSH01007006.1
chr1	224.334	AMEXG_0030083908	+	PGSH01008388.1
chr1	224.334	AMEXG_0030122381	+	PGSH01100551.1
chr1	224.334	AMEXG_0030008841	+	PGSH01049136.1
chr1	224.334	AMEXG_0030014034	+	PGSH01040389.1
chr1	231.011	AMEXG_0030002513	+	PGSH01013864.1
chr1	235.361	AMEXG_0030013936	+	PGSH01042902.1
chr1	235.361	AMEXG_0030007158	+	PGSH01070488.1
chr1	235.361	AMEXG_0030080535	+	PGSH01042311.1
chr1	235.361	AMEXG_0030090112	+	PGSH01013482.1
chr1	235.361	AMEXG_0030002929	+	PGSH01033993.1
chr1	235.361	AMEXG_0030008566	+	PGSH01080558.1
chr1	235.361	AMEXG_0030014409	+	PGSH01008951.1
chr1	235.361	AMEXG_0030015266	+	PGSH01080625.1
chr1	235.361	AMEXG_0030058279	+	PGSH01097396.1
chr1	235.361	AMEXG_0030062164	+	PGSH01078580.1
chr1	235.361	AMEXG_0030108567	+	PGSH01082815.1
chr1	235.361	AMEXG_0030046141	+	PGSH01049509.1
chr1	235.361	AMEXG_0030082329	+	PGSH01034787.1
chr1	235.361	AMEXG_0030122754	+	PGSH01066616.1
chr1	235.361	AMEXG_0030003837	+	PGSH01044058.1
chr1	235.361	AMEXG_0030096340	+	PGSH01048754.1
chr1	235.361	AMEXG_0030029322	+	PGSH01025454.1
chr1	235.361	AMEXG_0030004769	+	PGSH01084291.1
chr1	235.361	AMEXG_0030003944	+	PGSH01052858.1
chr1	235.361	AMEXG_0030021965	+	PGSH01079435.1
chr1	235.361	AMEXG_0030104322	+	PGSH01026204.1
chr1	235.361	AMEXG_0030123525	+	PGSH01030170.1
chr1	235.361	AMEXG_0030009031	+	PGSH01036568.1
chr1	235.361	AMEXG_0030118977	+	PGSH01095489.1
chr1	235.361	AMEXG_0030011049	+	PGSH01059214.1
chr1	235.361	AMEXG_0030098536	+	PGSH01043748.1
chr1	235.361	AMEXG_0030096912	+	PGSH01013550.1
chr1	235.361	AMEXG_0030122544	+	PGSH01054044.1
chr1	235.361	AMEXG_0030058340	+	PGSH01048374.1
chr1	235.361	AMEXG_0030075431	+	PGSH01037232.1
chr1	237.489	AMEXG_0030123878	+	PGSH01096795.1
chr1	237.489	AMEXG_0030061000	+	PGSH01123820.1
chr1	237.489	AMEXG_0030115475	+	PGSH01092940.1
chr1	237.489	AMEXG_0030006420	+	PGSH01022709.1
chr1	237.489	AMEXG_0030004989	+	PGSH01109433.1
chr1	237.489	AMEXG_0030009990	+	PGSH01110740.1
chr1	237.489	AMEXG_0030006089	+	PGSH01109444.1
chr1	237.489	AMEXG_0030089639	+	PGSH01047430.1
chr1	237.489	AMEXG_0030003381	+	PGSH01099361.1
chr1	237.489	AMEXG_0030031430	+	PGSH01035535.1
chr1	237.489	AMEXG_0030013427	+	PGSH01031584.1
chr1	237.489	AMEXG_0030001966	+	PGSH01080492.1
chr1	237.489	AMEXG_0030006778	+	PGSH01095624.1
chr1	237.489	AMEXG_0030016017	+	PGSH01019031.1
chr1	237.489	AMEXG_0030101876	+	PGSH01094061.1
chr1	237.489	AMEXG_0030062086	+	PGSH01106233.1
chr1	237.489	AMEXG_0030064339	+	PGSH01047177.1
chr1	237.489	AMEXG_0030109822	+	PGSH01026259.1
chr1	237.489	AMEXG_0030079499	+	PGSH01122748.1
chr1	237.489	AMEXG_0030003217	+	PGSH01018903.1
chr1	237.489	AMEXG_0030001692	+	PGSH01113171.1
chr1	237.489	AMEXG_0030009777	+	PGSH01094397.1
chr1	237.489	AMEXG_0030102485	+	PGSH01105380.1
chr1	237.489	AMEXG_0030056801	+	PGSH01125035.1
chr1	237.489	AMEXG_0030012135	+	PGSH01041627.1
chr1	237.489	AMEXG_0030084529	+	PGSH01034809.1
chr1	237.489	AMEXG_0030001039	+	PGSH01047801.1
chr1	237.489	AMEXG_0030007545	+	PGSH01054151.1
chr1	237.489	AMEXG_0030102306	+	PGSH01006056.1
chr1	237.489	AMEXG_0030084917	+	PGSH01019720.1
chr1	237.489	AMEXG_0030010386	+	PGSH01105716.1
chr1	237.489	AMEXG_0030006171	+	PGSH01086819.1
chr1	237.489	AMEXG_0030081179	+	PGSH01097625.1
chr1	237.489	AMEXG_0030102335	+	PGSH01042529.1
chr1	237.489	AMEXG_0030007338	+	PGSH01045350.1
chr1	237.489	AMEXG_0030001554	+	PGSH01065404.1
chr1	237.489	AMEXG_0030101009	+	PGSH01009817.1
chr1	237.489	AMEXG_0030002780	+	PGSH01098098.1
chr1	237.489	AMEXG_0030002863	+	PGSH01076730.1
chr1	237.489	AMEXG_0030096642	+	PGSH01051271.1
chr1	237.489	AMEXG_0030002546	+	PGSH01055358.1
chr1	237.489	AMEXG_0030060861	+	PGSH01074796.1
chr1	237.489	AMEXG_0030060804	+	PGSH01003125.1
chr1	237.489	AMEXG_0030105166	+	PGSH01081524.1
chr1	237.489	AMEXG_0030000770	+	PGSH01086765.1
chr1	237.489	AMEXG_0030050894	+	PGSH01116177.1
chr1	237.489	AMEXG_0030061447	+	PGSH01057204.1
chr1	237.489	AMEXG_0030012069	+	PGSH01084364.1
chr1	239.617	AMEXG_0030005973	+	PGSH01089331.1
chr1	239.617	AMEXG_0030095223	+	PGSH01027371.1
chr1	239.617	AMEXG_0030025373	+	PGSH01089525.1
chr1	239.617	AMEXG_0030062551	+	PGSH01062243.1
chr1	239.617	AMEXG_0030006498	+	PGSH01120761.1
chr1	239.617	AMEXG_0030067776	+	PGSH01093720.1
chr1	239.617	AMEXG_0030092371	+	PGSH01087681.1
chr1	239.617	AMEXG_0030046584	+	PGSH01103564.1
chr1	239.617	AMEXG_0030037237	+	PGSH01044392.1
chr1	239.617	AMEXG_0030004710	+	PGSH01010112.1
chr1	239.617	AMEXG_0030038223	+	PGSH01026801.1
chr1	239.617	AMEXG_0030037455	+	PGSH01067020.1
chr1	239.617	AMEXG_0030093502	+	PGSH01000936.1
chr1	239.617	AMEXG_0030002670	+	PGSH01085527.1
chr1	239.617	AMEXG_0030006074	+	PGSH01090589.1
chr1	239.617	AMEXG_0030012727	+	PGSH01031577.1
chr1	239.617	AMEXG_0030005245	+	PGSH01054128.1
chr1	239.617	AMEXG_0030009906	+	PGSH01005132.1
chr1	239.617	AMEXG_0030005705	+	PGSH01003832.1
chr1	239.617	AMEXG_0030006009	+	PGSH01008867.1
chr1	239.617	AMEXG_0030026095	+	PGSH01117186.1
chr1	239.617	AMEXG_0030106440	+	PGSH01048855.1
chr1	239.617	AMEXG_0030007133	+	PGSH01039063.1
chr1	239.617	AMEXG_0030069345	+	PGSH01054769.1
chr1	239.617	AMEXG_0030039144	+	PGSH01053210.1
chr1	239.617	AMEXG_0030002650	+	PGSH01060387.1
chr1	239.617	AMEXG_0030054065	+	PGSH01079756.1
chr1	239.617	AMEXG_0030074225	+	PGSH01029677.1
chr1	239.617	AMEXG_0030102116	+	PGSH01018634.1
chr1	239.617	AMEXG_0030002684	+	PGSH01103125.1
chr1	239.617	AMEXG_0030023607	+	PGSH01006527.1
chr1	239.617	AMEXG_0030043143	+	PGSH01051993.1
chr1	239.617	AMEXG_0030040388	+	PGSH01108530.1
chr1	241.745	AMEXG_0030114071	+	PGSH01087898.1
chr1	241.745	AMEXG_0030011801	+	PGSH01124585.1
chr1	241.745	AMEXG_0030003051	+	PGSH01061648.1
chr1	241.745	AMEXG_0030034507	+	PGSH01006636.1
chr1	241.745	AMEXG_0030079443	+	PGSH01052356.1
chr1	241.745	AMEXG_0030002784	+	PGSH01103126.1
chr1	241.745	AMEXG_0030005291	+	PGSH01111950.1
chr1	241.745	AMEXG_0030104086	+	PGSH01106653.1
chr1	241.745	AMEXG_0030041149	+	PGSH01059515.1
chr1	241.745	AMEXG_0030027465	+	PGSH01079490.1
chr1	241.745	AMEXG_0030000867	+	PGSH01082995.1
chr1	241.745	AMEXG_0030016027	+	PGSH01031610.1
chr1	241.745	AMEXG_0030078652	+	PGSH01063661.1
chr1	241.745	AMEXG_0030110736	+	PGSH01043870.1
chr1	241.745	AMEXG_0030048683	+	PGSH01102328.1
chr1	241.745	AMEXG_0030091041	+	PGSH01049958.1
chr1	241.745	AMEXG_0030013889	+	PGSH01109522.1
chr1	241.745	AMEXG_0030101174	+	PGSH01091540.1
chr1	241.745	AMEXG_0030085231	+	PGSH01037330.1
chr1	243.873	AMEXG_0030002973	+	PGSH01089301.1
chr1	243.873	AMEXG_0030013937	+	PGSH01044159.1
chr1	243.873	AMEXG_0030074866	+	PGSH01081221.1
chr1	243.873	AMEXG_0030096831	+	PGSH01037446.1
chr1	243.873	AMEXG_0030072043	+	PGSH01052282.1
chr1	243.873	AMEXG_0030069519	+	PGSH01022082.1
chr1	243.873	AMEXG_0030011698	+	PGSH01120813.1
chr1	243.873	AMEXG_0030013511	+	PGSH01011458.1
chr1	243.873	AMEXG_0030002990	+	PGSH01110670.1
chr1	246.001	AMEXG_0030117708	+	PGSH01008726.1
chr1	246.001	AMEXG_0030076094	+	PGSH01116429.1
chr1	246.001	AMEXG_0030007998	+	PGSH01120776.1
chr1	246.001	AMEXG_0030124721	+	PGSH01025150.1
chr1	246.001	AMEXG_0030010724	+	PGSH01027784.1
chr1	246.001	AMEXG_0030070131	+	PGSH01037179.1
chr1	246.001	AMEXG_0030056470	+	PGSH01086065.1
chr1	246.001	AMEXG_0030008062	+	PGSH01075525.1
chr1	246.001	AMEXG_0030003324	+	PGSH01027710.1
chr1	246.001	AMEXG_0030104945	+	PGSH01055125.1
chr1	246.001	AMEXG_0030002178	+	PGSH01095578.1
chr1	246.001	AMEXG_0030001210	+	PGSH01011335.1
chr1	246.001	AMEXG_0030024050	+	PGSH01060601.1
chr1	250.352	AMEXG_0030030366	+	PGSH01080776.1
chr1	250.352	AMEXG_0030003528	+	PGSH01032742.1
chr1	250.352	AMEXG_0030006765	+	PGSH01079283.1
chr1	250.352	AMEXG_0030075789	+	PGSH01110141.1
chr1	250.352	AMEXG_0030098249	+	PGSH01060086.1
chr1	250.352	AMEXG_0030008502	+	PGSH01000086.1
chr1	250.352	AMEXG_0030040295	+	PGSH01117328.1
chr1	250.352	AMEXG_0030000444	+	PGSH01054080.1
chr1	250.352	AMEXG_0030008160	+	PGSH01073012.1
chr1	250.352	AMEXG_0030078810	+	PGSH01010853.1
chr1	250.352	AMEXG_0030039516	+	PGSH01018008.1
chr1	250.352	AMEXG_0030025401	+	PGSH01124721.1
chr1	250.352	AMEXG_0030004091	+	PGSH01111938.1
chr1	250.352	AMEXG_0030054025	+	PGSH01029475.1
chr1	250.352	AMEXG_0030005239	+	PGSH01046586.1
chr1	250.352	AMEXG_0030000110	+	PGSH01011324.1
chr1	250.352	AMEXG_0030011276	+	PGSH01093155.1
chr1	250.352	AMEXG_0030032835	+	PGSH01041834.1
chr1	250.352	AMEXG_0030002033	+	PGSH01039012.1
chr1	250.352	AMEXG_0030066695	+	PGSH01117592.1
chr1	250.352	AMEXG_0030023247	+	PGSH01056822.1
chr1	250.352	AMEXG_0030005471	+	PGSH01086812.1
chr1	250.352	AMEXG_0030003285	+	PGSH01104388.1
chr1	250.352	AMEXG_0030001064	+	PGSH01079226.1
chr1	252.48	AMEXG_0030008638	+	PGSH01045363.1
chr1	252.678	AMEXG_0030010545	+	PGSH01054181.1
chr1	259.2	AMEXG_0030000274	+	PGSH01091788.1
chr1	263.619	AMEXG_0030075948	+	PGSH01058606.1
chr1	263.619	AMEXG_0030005946	+	PGSH01055392.1
chr1	263.619	AMEXG_0030013962	+	PGSH01075584.1
chr1	263.619	AMEXG_0030097812	+	PGSH01013559.1
chr1	263.619	AMEXG_0030067914	+	PGSH01015776.1
chr1	263.619	AMEXG_0030115154	+	PGSH01066540.1
chr1	263.619	AMEXG_0030097340	+	PGSH01048764.1
chr1	263.619	AMEXG_0030053347	+	PGSH01057123.1
chr1	263.619	AMEXG_0030009497	+	PGSH01119534.1
chr1	263.619	AMEXG_0030013142	+	PGSH01050436.1
chr1	263.619	AMEXG_0030002138	+	PGSH01045298.1
chr1	263.619	AMEXG_0030006452	+	PGSH01062939.1
chr1	263.619	AMEXG_0030051615	+	PGSH01016871.1
chr1	263.619	AMEXG_0030005970	+	PGSH01085560.1
chr1	269.892	AMEXG_0030002758	+	PGSH01070444.1
chr1	270.248	AMEXG_0030005773	+	PGSH01089329.1
chr1	274.598	AMEXG_0030115986	+	PGSH01106772.1
chr1	274.598	AMEXG_0030070934	+	PGSH01040958.1
chr1	274.598	AMEXG_0030042796	+	PGSH01118610.1
chr1	274.598	AMEXG_0030092850	+	PGSH01061289.1
chr1	274.598	AMEXG_0030028349	+	PGSH01059387.1
chr1	274.598	AMEXG_0030016679	+	PGSH01096980.1
chr1	274.598	AMEXG_0030122617	+	PGSH01020097.1
chr1	274.598	AMEXG_0030062695	+	PGSH01117552.1
chr1	274.598	AMEXG_0030014956	+	PGSH01068052.1
chr1	274.598	AMEXG_0030031726	+	PGSH01030510.1
chr1	274.598	AMEXG_0030005052	+	PGSH01062925.1
chr1	274.598	AMEXG_0030002545	+	PGSH01054101.1
chr1	274.598	AMEXG_0030001131	+	PGSH01037746.1
chr1	274.598	AMEXG_0030009607	+	PGSH01006387.1
chr1	274.598	AMEXG_0030001439	+	PGSH01046548.1
chr1	274.598	AMEXG_0030060336	+	PGSH01043366.1
chr1	274.598	AMEXG_0030035465	+	PGSH01079570.1
chr1	274.598	AMEXG_0030050368	+	PGSH01083490.1
chr1	274.598	AMEXG_0030002117	+	PGSH01018892.1
chr1	274.598	AMEXG_0030000423	+	PGSH01027681.1
chr1	274.598	AMEXG_0030055738	+	PGSH01045834.1
chr1	274.598	AMEXG_0030001287	+	PGSH01108139.1
chr1	274.598	AMEXG_0030048649	+	PGSH01059590.1
chr1	276.726	AMEXG_0030111358	+	PGSH01071530.1
chr1	276.726	AMEXG_0030001492	+	PGSH01113169.1
chr1	276.726	AMEXG_0030105743	+	PGSH01052619.1
chr1	276.726	AMEXG_0030000049	+	PGSH01060361.1
chr1	276.726	AMEXG_0030064021	+	PGSH01024543.1
chr1	276.726	AMEXG_0030028497	+	PGSH01119724.1
chr1	276.726	AMEXG_0030009220	+	PGSH01022737.1
chr1	276.726	AMEXG_0030056930	+	PGSH01035790.1
chr1	276.726	AMEXG_0030114656	+	PGSH01069049.1
chr1	276.726	AMEXG_0030021905	+	PGSH01003994.1
chr1	276.726	AMEXG_0030048947	+	PGSH01057079.1
chr1	276.726	AMEXG_0030102739	+	PGSH01047561.1
chr1	276.726	AMEXG_0030116128	+	PGSH01033868.1
chr1	276.726	AMEXG_0030107836	+	PGSH01043841.1
chr1	276.726	AMEXG_0030040188	+	PGSH01108528.1
chr1	276.726	AMEXG_0030097440	+	PGSH01048765.1
chr1	276.726	AMEXG_0030022753	+	PGSH01064359.1
chr1	276.726	AMEXG_0030018019	+	PGSH01021567.1
chr1	276.726	AMEXG_0030009554	+	PGSH01065484.1
chr1	276.726	AMEXG_0030096800	+	PGSH01124178.1
chr1	282.976	AMEXG_0030001956	+	PGSH01067922.1
chr1	289.25	AMEXG_0030006978	+	PGSH01095626.1
chr1	296.912	AMEXG_0030003273	+	PGSH01089304.1
chr1	301.308	AMEXG_0030053449	+	PGSH01059638.1
chr1	301.308	AMEXG_0030055720	+	PGSH01023202.1
chr1	301.308	AMEXG_0030051844	+	PGSH01053337.1
chr1	301.308	AMEXG_0030001608	+	PGSH01007565.1
chr1	301.308	AMEXG_0030001517	+	PGSH01018886.1
chr1	303.436	AMEXG_0030109841	+	PGSH01050146.1
chr1	303.436	AMEXG_0030039832	+	PGSH01038133.1
chr1	303.436	AMEXG_0030102009	+	PGSH01009827.1
chr1	303.436	AMEXG_0030038635	+	PGSH01041892.1
chr1	303.436	AMEXG_0030026806	+	PGSH01005301.1
chr1	303.436	AMEXG_0030004257	+	PGSH01069202.1
chr1	303.436	AMEXG_0030109720	+	PGSH01023742.1
chr1	303.436	AMEXG_0030009403	+	PGSH01001353.1
chr1	303.436	AMEXG_0030007612	+	PGSH01012657.1
chr1	303.436	AMEXG_0030008636	+	PGSH01042849.1
chr1	303.436	AMEXG_0030065134	+	PGSH01040900.1
chr1	303.436	AMEXG_0030113252	+	PGSH01064007.1
chr1	303.436	AMEXG_0030005402	+	PGSH01000055.1
chr1	303.436	AMEXG_0030020009	+	PGSH01009007.1
chr1	303.436	AMEXG_0030057144	+	PGSH01053390.1
chr1	303.436	AMEXG_0030006634	+	PGSH01040315.1
chr1	303.436	AMEXG_0030038094	+	PGSH01116049.1
chr1	303.436	AMEXG_0030071427	+	PGSH01032164.1
chr1	303.436	AMEXG_0030076823	+	PGSH01027187.1
chr1	303.436	AMEXG_0030120655	+	PGSH01067852.1
chr1	303.436	AMEXG_0030041827	+	PGSH01031868.1
chr1	303.436	AMEXG_0030103489	+	PGSH01110418.1
chr1	304.393	AMEXG_0030005431	+	PGSH01036532.1
chr1	304.393	AMEXG_0030102236	+	PGSH01043785.1
chr1	305.542	AMEXG_0030001625	+	PGSH01028951.1
chr1	305.542	AMEXG_0030006209	+	PGSH01008869.1
chr1	305.542	AMEXG_0030023407	+	PGSH01006525.1
chr1	305.542	AMEXG_0030079357	+	PGSH01069953.1
chr1	305.542	AMEXG_0030094032	+	PGSH01038675.1
chr1	305.542	AMEXG_0030009152	+	PGSH01062966.1
chr1	305.542	AMEXG_0030102798	+	PGSH01121724.1
chr1	305.542	AMEXG_0030004601	+	PGSH01124513.1
chr1	305.542	AMEXG_0030090940	+	PGSH01048700.1
chr1	305.542	AMEXG_0030010107	+	PGSH01006392.1
chr1	305.542	AMEXG_0030010011	+	PGSH01011423.1
chr1	305.542	AMEXG_0030097079	+	PGSH01097784.1
chr1	305.542	AMEXG_0030119674	+	PGSH01091725.1
chr1	305.542	AMEXG_0030007923	+	PGSH01026498.1
chr1	305.542	AMEXG_0030006289	+	PGSH01109446.1
chr1	305.542	AMEXG_0030015423	+	PGSH01026573.1
chr1	305.542	AMEXG_0030048552	+	PGSH01063360.1
chr1	305.542	AMEXG_0030089501	+	PGSH01125362.1
chr1	305.542	AMEXG_0030095399	+	PGSH01122907.1
chr1	305.542	AMEXG_0030065333	+	PGSH01039645.1
chr1	305.542	AMEXG_0030012847	+	PGSH01056718.1
chr1	305.542	AMEXG_0030014996	+	PGSH01118332.1
chr1	305.542	AMEXG_0030005598	+	PGSH01120752.1
chr1	305.542	AMEXG_0030001715	+	PGSH01016372.1
chr1	305.542	AMEXG_0030005591	+	PGSH01111953.1
chr1	305.542	AMEXG_0030037693	+	PGSH01114788.1
chr1	305.542	AMEXG_0030077404	+	PGSH01003291.1
chr1	305.542	AMEXG_0030006299	+	PGSH01122016.1
chr1	305.542	AMEXG_0030006001	+	PGSH01124527.1
chr1	305.542	AMEXG_0030003920	+	PGSH01022684.1
chr1	305.542	AMEXG_0030009615	+	PGSH01016451.1
chr1	305.542	AMEXG_0030043784	+	PGSH01103536.1
chr1	305.542	AMEXG_0030004426	+	PGSH01030237.1
chr1	305.542	AMEXG_0030076884	+	PGSH01103867.1
chr1	305.542	AMEXG_0030051055	+	PGSH01067156.1
chr1	305.542	AMEXG_0030032956	+	PGSH01068232.1
chr1	312.254	AMEXG_0030001553	+	PGSH01064147.1
chr1	314.414	AMEXG_0030043865	+	PGSH01079654.1
chr1	314.414	AMEXG_0030009010	+	PGSH01010155.1
chr1	314.414	AMEXG_0030070137	+	PGSH01044721.1
chr1	314.414	AMEXG_0030111087	+	PGSH01107980.1
chr1	314.414	AMEXG_0030096862	+	PGSH01076413.1
chr1	314.414	AMEXG_0030084797	+	PGSH01120287.1
chr1	314.414	AMEXG_0030064226	+	PGSH01030835.1
chr1	314.414	AMEXG_0030008057	+	PGSH01069240.1
chr1	314.414	AMEXG_0030004831	+	PGSH01036526.1
chr1	314.414	AMEXG_0030049752	+	PGSH01063372.1
chr1	316.542	AMEXG_0030053701	+	PGSH01125004.1
chr1	316.542	AMEXG_0030024066	+	PGSH01080713.1
chr1	316.542	AMEXG_0030006056	+	PGSH01067963.1
chr1	316.542	AMEXG_0030090647	+	PGSH01057496.1
chr1	316.542	AMEXG_0030011026	+	PGSH01030303.1
chr1	316.542	AMEXG_0030089146	+	PGSH01056224.1
chr1	316.542	AMEXG_0030048069	+	PGSH01084724.1
chr1	316.542	AMEXG_0030031445	+	PGSH01054390.1
chr1	316.542	AMEXG_0030010003	+	PGSH01001359.1
chr1	316.542	AMEXG_0030089976	+	PGSH01093942.1
chr1	320.893	AMEXG_0030005756	+	PGSH01067960.1
chr1	320.893	AMEXG_0030072019	+	PGSH01022107.1
chr1	320.893	AMEXG_0030010491	+	PGSH01112002.1
chr1	320.893	AMEXG_0030043787	+	PGSH01107307.1
chr1	320.893	AMEXG_0030044281	+	PGSH01099770.1
chr1	320.893	AMEXG_0030001183	+	PGSH01103110.1
chr1	320.893	AMEXG_0030005289	+	PGSH01109436.1
chr1	320.893	AMEXG_0030048301	+	PGSH01124950.1
chr1	320.893	AMEXG_0030025595	+	PGSH01117181.1
chr1	323.021	AMEXG_0030017462	+	PGSH01075619.1
chr1	323.021	AMEXG_0030122556	+	PGSH01069128.1
chr1	323.021	AMEXG_0030013240	+	PGSH01047923.1
chr1	323.021	AMEXG_0030115176	+	PGSH01094194.1
chr1	323.021	AMEXG_0030070507	+	PGSH01006996.1
chr1	323.021	AMEXG_0030082399	+	PGSH01122777.1
chr1	323.021	AMEXG_0030008374	+	PGSH01090612.1
chr1	323.021	AMEXG_0030047032	+	PGSH01038205.1
chr1	323.021	AMEXG_0030025569	+	PGSH01084499.1
chr1	323.021	AMEXG_0030007150	+	PGSH01060432.1
chr1	323.021	AMEXG_0030087346	+	PGSH01056206.1
chr1	323.021	AMEXG_0030073596	+	PGSH01118918.1
chr1	323.021	AMEXG_0030000081	+	PGSH01100585.1
chr1	323.021	AMEXG_0030051634	+	PGSH01040765.1
chr1	323.021	AMEXG_0030007845	+	PGSH01054154.1
chr1	323.021	AMEXG_0030076118	+	PGSH01020890.1
chr1	323.021	AMEXG_0030121862	+	PGSH01076663.1
chr1	323.021	AMEXG_0030056507	+	PGSH01006856.1
chr1	323.021	AMEXG_0030069745	+	PGSH01054773.1
chr1	323.021	AMEXG_0030057775	+	PGSH01092363.1
chr1	323.021	AMEXG_0030063622	+	PGSH01025797.1
chr1	323.021	AMEXG_0030032358	+	PGSH01070740.1
chr1	323.021	AMEXG_0030093485	+	PGSH01105290.1
chr1	323.021	AMEXG_0030008388	+	PGSH01108210.1
chr1	323.021	AMEXG_0030075509	+	PGSH01009562.1
chr1	323.021	AMEXG_0030020969	+	PGSH01084453.1
chr1	323.021	AMEXG_0030032940	+	PGSH01048120.1
chr1	323.021	AMEXG_0030110441	+	PGSH01050152.1
chr1	323.021	AMEXG_0030013081	+	PGSH01099458.1
chr1	323.021	AMEXG_0030009215	+	PGSH01016447.1
chr1	323.021	AMEXG_0030004942	+	PGSH01050354.1
chr1	323.021	AMEXG_0030059379	+	PGSH01097407.1
chr1	326.863	AMEXG_0030001724	+	PGSH01027694.1
chr1	332.212	AMEXG_0030006632	+	PGSH01037801.1
chr1	337.411	AMEXG_0030009548	+	PGSH01057942.1
chr1	342	AMEXG_0030036473	+	PGSH01089636.1
chr1	342	AMEXG_0030008287	+	PGSH01106952.1
chr1	342	AMEXG_0030009456	+	PGSH01067997.1
chr1	342	AMEXG_0030012989	+	PGSH01109513.1
chr1	342	AMEXG_0030011873	+	PGSH01089390.1
chr1	342	AMEXG_0030058467	+	PGSH01082314.1
chr1	342	AMEXG_0030093104	+	PGSH01003448.1
chr1	342	AMEXG_0030005803	+	PGSH01001317.1
chr1	342	AMEXG_0030091258	+	PGSH01071329.1
chr1	342	AMEXG_0030085966	+	PGSH01081332.1
chr1	342	AMEXG_0030102625	+	PGSH01029961.1
chr1	342	AMEXG_0030013229	+	PGSH01034096.1
chr1	342	AMEXG_0030001179	+	PGSH01098082.1
chr1	342	AMEXG_0030111743	+	PGSH01052679.1
chr1	342	AMEXG_0030029516	+	PGSH01017908.1
chr1	342	AMEXG_0030073975	+	PGSH01092525.1
chr1	342	AMEXG_0030066131	+	PGSH01037139.1
chr1	342	AMEXG_0030002493	+	PGSH01114436.1
chr1	342	AMEXG_0030111187	+	PGSH01107981.1
chr1	342	AMEXG_0030005102	+	PGSH01000052.1
chr1	342	AMEXG_0030013940	+	PGSH01047930.1
chr1	342	AMEXG_0030004505	+	PGSH01003820.1
chr1	342	AMEXG_0030071073	+	PGSH01089982.1
chr1	342	AMEXG_0030011575	+	PGSH01091901.1
chr1	342	AMEXG_0030080723	+	PGSH01027226.1
chr1	342	AMEXG_0030021261	+	PGSH01074400.1
chr1	342	AMEXG_0030005690	+	PGSH01110697.1
chr1	342	AMEXG_0030004081	+	PGSH01099368.1
chr1	342	AMEXG_0030092912	+	PGSH01013510.1
chr1	342	AMEXG_0030084847	+	PGSH01057438.1
chr1	342	AMEXG_0030002565	+	PGSH01079241.1
chr1	344.972	AMEXG_0030049169	+	PGSH01084735.1
chr1	344.972	AMEXG_0030091965	+	PGSH01080135.1
chr1	344.972	AMEXG_0030122982	+	PGSH01101814.1
chr1	344.972	AMEXG_0030029864	+	PGSH01078257.1
chr1	344.972	AMEXG_0030056150	+	PGSH01060922.1
chr1	344.972	AMEXG_0030059785	+	PGSH01104953.1
chr1	344.972	AMEXG_0030077730	+	PGSH01035998.1
chr1	344.972	AMEXG_0030047505	+	PGSH01004250.1
chr1	344.972	AMEXG_0030125582	+	PGSH01101840.1
chr1	344.972	AMEXG_0030111623	+	PGSH01027535.1
chr1	344.972	AMEXG_0030003384	+	PGSH01103132.1
chr1	344.972	AMEXG_0030009602	+	PGSH01000097.1
chr1	344.972	AMEXG_0030009570	+	PGSH01085596.1
chr1	344.972	AMEXG_0030087024	+	PGSH01028547.1
chr1	344.972	AMEXG_0030013115	+	PGSH01016486.1
chr1	344.972	AMEXG_0030082269	+	PGSH01085066.1
chr1	344.972	AMEXG_0030018429	+	PGSH01034148.1
chr1	344.972	AMEXG_0030008553	+	PGSH01064217.1
chr1	344.972	AMEXG_0030112298	+	PGSH01121819.1
chr1	349.323	AMEXG_0030007639	+	PGSH01046610.1
chr1	349.323	AMEXG_0030056139	+	PGSH01047095.1
chr1	349.323	AMEXG_0030000845	+	PGSH01055341.1
chr1	349.323	AMEXG_0030004510	+	PGSH01010110.1
chr1	349.323	AMEXG_0030009290	+	PGSH01110733.1
chr1	349.323	AMEXG_0030069429	+	PGSH01034658.1
chr1	349.323	AMEXG_0030065554	+	PGSH01066044.1
chr1	349.323	AMEXG_0030036833	+	PGSH01039360.1
chr1	349.323	AMEXG_0030117924	+	PGSH01028856.1
chr1	349.323	AMEXG_0030102157	+	PGSH01070181.1
chr1	349.323	AMEXG_0030053683	+	PGSH01102378.1
chr1	349.323	AMEXG_0030114056	+	PGSH01069043.1
chr1	349.323	AMEXG_0030006434	+	PGSH01040313.1
chr1	349.323	AMEXG_0030033439	+	PGSH01046868.1
chr1	349.323	AMEXG_0030005909	+	PGSH01008866.1
chr1	349.323	AMEXG_0030013498	+	PGSH01120831.1
chr1	349.323	AMEXG_0030004967	+	PGSH01081779.1
chr1	349.323	AMEXG_0030002148	+	PGSH01057868.1
chr1	349.323	AMEXG_0030006820	+	PGSH01022713.1
chr1	349.323	AMEXG_0030001065	+	PGSH01080483.1
chr1	349.323	AMEXG_0030046669	+	PGSH01084710.1
chr1	349.323	AMEXG_0030040267	+	PGSH01082132.1
chr1	351.451	AMEXG_0030017815	+	PGSH01016533.1
chr1	351.451	AMEXG_0030005996	+	PGSH01118242.1
chr1	351.451	AMEXG_0030014452	+	PGSH01063019.1
chr1	351.451	AMEXG_0030002023	+	PGSH01026439.1
chr1	351.451	AMEXG_0030010054	+	PGSH01065489.1
chr1	351.451	AMEXG_0030068782	+	PGSH01101272.1
chr1	351.451	AMEXG_0030061813	+	PGSH01014457.1
chr1	351.451	AMEXG_0030078920	+	PGSH01023434.1
chr1	351.451	AMEXG_0030007253	+	PGSH01064204.1
chr1	351.451	AMEXG_0030065984	+	PGSH01103758.1
chr1	351.451	AMEXG_0030004708	+	PGSH01007596.1
chr1	353.579	AMEXG_0030001609	+	PGSH01008823.1
chr1	353.579	AMEXG_0030101607	+	PGSH01007307.1
chr1	353.579	AMEXG_0030014032	+	PGSH01037875.1
chr1	353.579	AMEXG_0030010082	+	PGSH01100685.1
chr1	353.579	AMEXG_0030010874	+	PGSH01090637.1
chr1	353.579	AMEXG_0030121903	+	PGSH01002478.1
chr1	353.579	AMEXG_0030013306	+	PGSH01005166.1
chr1	353.579	AMEXG_0030033725	+	PGSH01029272.1
chr1	353.579	AMEXG_0030009801	+	PGSH01124565.1
chr1	353.579	AMEXG_0030092787	+	PGSH01107797.1
chr1	353.579	AMEXG_0030006830	+	PGSH01035289.1
chr1	353.579	AMEXG_0030004292	+	PGSH01113197.1
chr1	353.579	AMEXG_0030002104	+	PGSH01002538.1
chr1	353.579	AMEXG_0030033301	+	PGSH01124800.1
chr1	353.579	AMEXG_0030050172	+	PGSH01088516.1
chr1	353.579	AMEXG_0030095185	+	PGSH01105307.1
chr1	353.579	AMEXG_0030009321	+	PGSH01023996.1
chr1	353.579	AMEXG_0030003426	+	PGSH01030227.1
chr1	353.579	AMEXG_0030032859	+	PGSH01072002.1
chr1	353.579	AMEXG_0030005543	+	PGSH01051617.1
chr1	353.579	AMEXG_0030027259	+	PGSH01071946.1
chr1	353.579	AMEXG_0030118453	+	PGSH01065316.1
chr1	353.579	AMEXG_0030008428	+	PGSH01032791.1
chr1	353.579	AMEXG_0030010923	+	PGSH01026528.1
chr1	353.579	AMEXG_0030009414	+	PGSH01015191.1
chr1	353.579	AMEXG_0030106032	+	PGSH01038795.1
chr1	353.579	AMEXG_0030094890	+	PGSH01111589.1
chr1	353.579	AMEXG_0030014681	+	PGSH01099474.1
chr1	353.579	AMEXG_0030067109	+	PGSH01009478.1
chr1	353.579	AMEXG_0030057948	+	PGSH01058426.1
chr1	353.579	AMEXG_0030064347	+	PGSH01057233.1
chr1	353.579	AMEXG_0030065026	+	PGSH01030843.1
chr1	353.579	AMEXG_0030072266	+	PGSH01081195.1
chr1	353.579	AMEXG_0030048141	+	PGSH01049529.1
chr1	353.579	AMEXG_0030060619	+	PGSH01021993.1
chr1	353.579	AMEXG_0030039170	+	PGSH01085892.1
chr1	353.579	AMEXG_0030075788	+	PGSH01108884.1
chr1	353.579	AMEXG_0030006095	+	PGSH01116986.1
chr1	353.579	AMEXG_0030058827	+	PGSH01032038.1
chr1	353.579	AMEXG_0030058072	+	PGSH01088595.1
chr1	353.579	AMEXG_0030008666	+	PGSH01080559.1
chr1	353.579	AMEXG_0030079520	+	PGSH01023440.1
chr1	353.579	AMEXG_0030068993	+	PGSH01115101.1
chr1	357.929	AMEXG_0030039067	+	PGSH01082120.1
chr1	357.929	AMEXG_0030038689	+	PGSH01109770.1
chr1	357.929	AMEXG_0030118707	+	PGSH01007478.1
chr1	357.929	AMEXG_0030075730	+	PGSH01035978.1
chr1	357.929	AMEXG_0030088378	+	PGSH01096440.1
chr1	357.929	AMEXG_0030008216	+	PGSH01017695.1
chr1	357.929	AMEXG_0030125390	+	PGSH01111894.1
chr1	357.929	AMEXG_0030013736	+	PGSH01042900.1
chr1	357.929	AMEXG_0030124284	+	PGSH01104341.1
chr1	357.929	AMEXG_0030009581	+	PGSH01099423.1
chr1	357.929	AMEXG_0030118112	+	PGSH01013762.1
chr1	357.929	AMEXG_0030020034	+	PGSH01040449.1
chr1	357.929	AMEXG_0030046444	+	PGSH01053283.1
chr1	357.929	AMEXG_0030002373	+	PGSH01089295.1
chr1	357.929	AMEXG_0030001306	+	PGSH01006304.1
chr1	357.929	AMEXG_0030123765	+	PGSH01080453.1
chr1	357.929	AMEXG_0030011705	+	PGSH01003892.1
chr1	357.929	AMEXG_0030083760	+	PGSH01073768.1
chr1	357.929	AMEXG_0030036092	+	PGSH01113515.1
chr1	357.929	AMEXG_0030002438	+	PGSH01045301.1
chr1	359.121	AMEXG_0030012641	+	PGSH01049174.1
chr1	359.121	AMEXG_0030001173	+	PGSH01090540.1
chr1	360.035	AMEXG_0030000188	+	PGSH01109385.1
chr1	360.035	AMEXG_0030000857	+	PGSH01070425.1
chr1	360.035	AMEXG_0030013468	+	PGSH01083121.1
chr1	360.035	AMEXG_0030008589	+	PGSH01109469.1
chr1	360.035	AMEXG_0030033637	+	PGSH01044356.1
chr1	362.163	AMEXG_0030036794	+	PGSH01116036.1
chr1	362.163	AMEXG_0030002371	+	PGSH01086781.1
chr1	362.163	AMEXG_0030009879	+	PGSH01096912.1
chr1	362.163	AMEXG_0030095816	+	PGSH01018571.1
chr1	362.163	AMEXG_0030052831	+	PGSH01037006.1
chr1	362.163	AMEXG_0030034881	+	PGSH01099676.1
chr1	362.163	AMEXG_0030001053	+	PGSH01065399.1
chr1	362.163	AMEXG_0030009193	+	PGSH01114503.1
chr1	362.163	AMEXG_0030089862	+	PGSH01076343.1
chr1	362.163	AMEXG_0030035715	+	PGSH01016712.1
chr1	362.163	AMEXG_0030063328	+	PGSH01033340.1
chr1	362.163	AMEXG_0030000740	+	PGSH01049055.1
chr1	362.163	AMEXG_0030002351	+	PGSH01061641.1
chr1	362.163	AMEXG_0030054157	+	PGSH01069701.1
chr1	362.163	AMEXG_0030089689	+	PGSH01110280.1
chr1	362.163	AMEXG_0030038198	+	PGSH01121078.1
chr1	362.163	AMEXG_0030002431	+	PGSH01036502.1
chr1	362.163	AMEXG_0030038677	+	PGSH01094686.1
chr1	362.163	AMEXG_0030032870	+	PGSH01085829.1
chr1	362.163	AMEXG_0030000848	+	PGSH01059112.1
chr1	362.163	AMEXG_0030084806	+	PGSH01005881.1
chr1	362.163	AMEXG_0030117254	+	PGSH01066561.1
chr1	362.163	AMEXG_0030069826	+	PGSH01030891.1
chr1	362.163	AMEXG_0030067513	+	PGSH01014514.1
chr1	362.163	AMEXG_0030061824	+	PGSH01028295.1
chr1	362.163	AMEXG_0030108239	+	PGSH01047616.1
chr1	362.163	AMEXG_0030008641	+	PGSH01049134.1
chr1	362.163	AMEXG_0030006075	+	PGSH01091846.1
chr1	362.163	AMEXG_0030005815	+	PGSH01016413.1
chr1	362.163	AMEXG_0030119755	+	PGSH01067843.1
chr1	362.163	AMEXG_0030039452	+	PGSH01063269.1
chr1	362.163	AMEXG_0030013892	+	PGSH01113293.1
chr1	362.163	AMEXG_0030013380	+	PGSH01098204.1
chr1	362.163	AMEXG_0030011233	+	PGSH01039104.1
chr1	362.163	AMEXG_0030005521	+	PGSH01023958.1
chr1	362.163	AMEXG_0030001757	+	PGSH01069177.1
chr1	362.163	AMEXG_0030003792	+	PGSH01113192.1
chr1	362.163	AMEXG_0030000011	+	PGSH01012581.1
chr1	362.163	AMEXG_0030111349	+	PGSH01060217.1
chr1	362.163	AMEXG_0030005090	+	PGSH01110691.1
chr1	362.163	AMEXG_0030004291	+	PGSH01111940.1
chr1	362.163	AMEXG_0030003349	+	PGSH01059137.1
chr1	362.163	AMEXG_0030024351	+	PGSH01061861.1
chr1	362.163	AMEXG_0030033443	+	PGSH01051896.1
chr1	362.163	AMEXG_0030081087	+	PGSH01107680.1
chr1	362.163	AMEXG_0030000561	+	PGSH01075450.1
chr1	362.163	AMEXG_0030037353	+	PGSH01064505.1
chr1	362.163	AMEXG_0030008125	+	PGSH01029016.1
chr1	362.163	AMEXG_0030124052	+	PGSH01064115.1
chr1	362.163	AMEXG_0030000132	+	PGSH01038993.1
chr1	362.163	AMEXG_0030002491	+	PGSH01111922.1
chr1	362.163	AMEXG_0030111291	+	PGSH01113010.1
chr1	362.163	AMEXG_0030049803	+	PGSH01001757.1
chr1	362.163	AMEXG_0030102310	+	PGSH01011088.1
chr1	362.163	AMEXG_0030077234	+	PGSH01041021.1
chr1	362.163	AMEXG_0030068456	+	PGSH01068587.1
chr1	362.163	AMEXG_0030009351	+	PGSH01061711.1
chr1	362.163	AMEXG_0030044845	+	PGSH01054524.1
chr1	362.163	AMEXG_0030106923	+	PGSH01027488.1
chr1	362.163	AMEXG_0030105825	+	PGSH01029993.1
chr1	362.163	AMEXG_0030051745	+	PGSH01054593.1
chr1	362.163	AMEXG_0030035318	+	PGSH01020482.1
chr1	362.163	AMEXG_0030054749	+	PGSH01059651.1
chr1	364.291	AMEXG_0030076139	+	PGSH01047295.1
chr1	364.291	AMEXG_0030006936	+	PGSH01042832.1
chr1	364.291	AMEXG_0030004474	+	PGSH01090573.1
chr1	364.291	AMEXG_0030095681	+	PGSH01100284.1
chr1	364.291	AMEXG_0030010218	+	PGSH01020231.1
chr1	364.291	AMEXG_0030090934	+	PGSH01041158.1
chr1	364.291	AMEXG_0030043237	+	PGSH01044452.1
chr1	364.291	AMEXG_0030107133	+	PGSH01040063.1
chr1	364.291	AMEXG_0030056908	+	PGSH01008118.1
chr1	364.291	AMEXG_0030035627	+	PGSH01031806.1
chr1	364.291	AMEXG_0030004905	+	PGSH01003824.1
chr1	364.291	AMEXG_0030000074	+	PGSH01091786.1
chr1	364.291	AMEXG_0030079336	+	PGSH01043556.1
chr1	364.291	AMEXG_0030003362	+	PGSH01075478.1
chr1	364.291	AMEXG_0030071852	+	PGSH01063593.1
chr1	364.291	AMEXG_0030007673	+	PGSH01089348.1
chr1	370.98	AMEXG_0030121742	+	PGSH01051522.1
chr1	370.98	AMEXG_0030008618	+	PGSH01020215.1
chr1	370.98	AMEXG_0030108034	+	PGSH01041329.1
chr1	370.98	AMEXG_0030087504	+	PGSH01003392.1
chr1	370.98	AMEXG_0030004200	+	PGSH01123252.1
chr1	370.98	AMEXG_0030107447	+	PGSH01057664.1
chr1	370.98	AMEXG_0030096771	+	PGSH01087725.1
chr1	370.98	AMEXG_0030058184	+	PGSH01103680.1
chr1	371.053	AMEXG_0030008941	+	PGSH01049137.1
chr1	380.094	AMEXG_0030006048	+	PGSH01057907.1
chr1	380.094	AMEXG_0030011262	+	PGSH01075557.1
chr1	380.094	AMEXG_0030006458	+	PGSH01070481.1
chr1	380.094	AMEXG_0030018532	+	PGSH01037920.1
chr1	380.094	AMEXG_0030012484	+	PGSH01103223.1
chr1	380.094	AMEXG_0030117812	+	PGSH01013759.1
chr1	380.094	AMEXG_0030081900	+	PGSH01124029.1
chr1	380.094	AMEXG_0030098247	+	PGSH01057572.1
chr1	380.094	AMEXG_0030117270	+	PGSH01086673.1
chr1	380.094	AMEXG_0030096923	+	PGSH01027388.1
chr1	380.094	AMEXG_0030001809	+	PGSH01008825.1
chr1	380.094	AMEXG_0030022274	+	PGSH01090751.1
chr1	380.094	AMEXG_0030012723	+	PGSH01026546.1
chr1	380.094	AMEXG_0030111670	+	PGSH01086617.1
chr1	380.094	AMEXG_0030024520	+	PGSH01022890.1
chr1	380.094	AMEXG_0030026964	+	PGSH01078228.1
chr1	380.094	AMEXG_0030005604	+	PGSH01002573.1
chr1	380.094	AMEXG_0030000982	+	PGSH01101851.1
chr1	380.094	AMEXG_0030062886	+	PGSH01106241.1
chr1	380.094	AMEXG_0030000310	+	PGSH01011326.1
chr1	380.094	AMEXG_0030008683	+	PGSH01101928.1
chr1	380.094	AMEXG_0030008311	+	PGSH01011406.1
chr1	380.094	AMEXG_0030092448	+	PGSH01058771.1
chr1	380.094	AMEXG_0030011222	+	PGSH01025273.1
chr1	380.094	AMEXG_0030111716	+	PGSH01018730.1
chr1	380.094	AMEXG_0030005839	+	PGSH01046592.1
chr1	380.094	AMEXG_0030066980	+	PGSH01098740.1
chr1	380.094	AMEXG_0030104522	+	PGSH01026206.1
chr1	380.094	AMEXG_0030009297	+	PGSH01119532.1
chr1	380.094	AMEXG_0030013300	+	PGSH01123343.1
chr1	380.094	AMEXG_0030002656	+	PGSH01067929.1
chr1	380.094	AMEXG_0030082478	+	PGSH01096381.1
chr1	380.094	AMEXG_0030086322	+	PGSH01026024.1
chr1	382.222	AMEXG_0030045605	+	PGSH01004231.1
chr1	382.222	AMEXG_0030078385	+	PGSH01105139.1
chr1	382.222	AMEXG_0030051771	+	PGSH01087275.1
chr1	382.222	AMEXG_0030049079	+	PGSH01097304.1
chr1	382.222	AMEXG_0030000618	+	PGSH01021393.1
chr1	382.222	AMEXG_0030011970	+	PGSH01085620.1
chr1	382.222	AMEXG_0030036121	+	PGSH01024264.1
chr1	382.222	AMEXG_0030021765	+	PGSH01079433.1
chr1	382.222	AMEXG_0030051543	+	PGSH01052077.1
chr1	382.222	AMEXG_0030085796	+	PGSH01119040.1
chr1	382.222	AMEXG_0030027774	+	PGSH01090806.1
chr1	384.35	AMEXG_0030007048	+	PGSH01057917.1
chr1	384.35	AMEXG_0030063803	+	PGSH01001897.1
chr1	384.35	AMEXG_0030123025	+	PGSH01030165.1
chr1	384.35	AMEXG_0030066368	+	PGSH01083650.1
chr1	384.35	AMEXG_0030000177	+	PGSH01095558.1
chr1	386.652	AMEXG_0030033135	+	PGSH01041837.1
chr1	386.652	AMEXG_0030000821	+	PGSH01025169.1
chr1	386.652	AMEXG_0030070830	+	PGSH01035929.1
chr1	386.652	AMEXG_0030093735	+	PGSH01042443.1
chr1	399.68	AMEXG_0030005230	+	PGSH01035273.1
chr1	399.68	AMEXG_0030011033	+	PGSH01039102.1
chr1	412.572	AMEXG_0030043212	+	PGSH01013013.1
chr1	412.572	AMEXG_0030092528	+	PGSH01033632.1
chr1	412.572	AMEXG_0030003098	+	PGSH01120727.1
chr1	412.572	AMEXG_0030065503	+	PGSH01001914.1
chr1	412.572	AMEXG_0030004739	+	PGSH01046581.1
chr1	412.572	AMEXG_0030048982	+	PGSH01101074.1
chr1	412.572	AMEXG_0030115632	+	PGSH01038891.1
chr1	412.572	AMEXG_0030055709	+	PGSH01009364.1
chr1	412.572	AMEXG_0030095802	+	PGSH01000959.1
chr1	412.572	AMEXG_0030000367	+	PGSH01082990.1
chr1	412.572	AMEXG_0030067053	+	PGSH01064802.1
chr1	412.572	AMEXG_0030065951	+	PGSH01062277.1
chr1	412.572	AMEXG_0030109367	+	PGSH01082823.1
chr1	414.7	AMEXG_0030008194	+	PGSH01115750.1
chr1	414.7	AMEXG_0030077872	+	PGSH01088793.1
chr1	414.7	AMEXG_0030002376	+	PGSH01093066.1
chr1	414.7	AMEXG_0030080311	+	PGSH01012126.1
chr1	414.7	AMEXG_0030012130	+	PGSH01035342.1
chr1	414.7	AMEXG_0030077969	+	PGSH01085023.1
chr1	414.7	AMEXG_0030080810	+	PGSH01010873.1
chr1	414.7	AMEXG_0030123965	+	PGSH01080455.1
chr1	414.7	AMEXG_0030113585	+	PGSH01105491.1
chr1	419.062	AMEXG_0030004376	+	PGSH01093086.1
chr1	421.201	AMEXG_0030013159	+	PGSH01071805.1
chr1	421.201	AMEXG_0030079648	+	PGSH01058643.1
chr1	421.201	AMEXG_0030012646	+	PGSH01055459.1
chr1	421.201	AMEXG_0030028821	+	PGSH01024191.1
chr1	421.201	AMEXG_0030028127	+	PGSH01031731.1
chr1	421.201	AMEXG_0030104183	+	PGSH01102883.1
chr1	421.201	AMEXG_0030004214	+	PGSH01015139.1
chr1	421.201	AMEXG_0030123820	+	PGSH01023883.1
chr1	421.201	AMEXG_0030006184	+	PGSH01103160.1
chr1	421.201	AMEXG_0030104298	+	PGSH01121739.1
chr1	421.201	AMEXG_0030107872	+	PGSH01089093.1
chr1	421.201	AMEXG_0030082486	+	PGSH01106437.1
chr1	421.201	AMEXG_0030009829	+	PGSH01034062.1
chr1	421.201	AMEXG_0030013012	+	PGSH01012711.1
chr1	421.201	AMEXG_0030013652	+	PGSH01063011.1
chr1	421.201	AMEXG_0030076366	+	PGSH01081236.1
chr1	421.201	AMEXG_0030002616	+	PGSH01017639.1
chr1	421.201	AMEXG_0030005019	+	PGSH01021437.1
chr1	421.201	AMEXG_0030087734	+	PGSH01041126.1
chr1	421.201	AMEXG_0030036177	+	PGSH01094661.1
chr1	423.329	AMEXG_0030033524	+	PGSH01028012.1
chr1	423.329	AMEXG_0030000185	+	PGSH01105614.1
chr1	423.329	AMEXG_0030008707	+	PGSH01006378.1
chr1	423.329	AMEXG_0030031595	+	PGSH01117241.1
chr1	423.329	AMEXG_0030066496	+	PGSH01118847.1
chr1	423.329	AMEXG_0030077381	+	PGSH01100101.1
chr1	423.329	AMEXG_0030056463	+	PGSH01077266.1
chr1	423.329	AMEXG_0030031269	+	PGSH01084556.1
chr1	425.457	AMEXG_0030002788	+	PGSH01108154.1
chr1	425.457	AMEXG_0030032034	+	PGSH01040569.1
chr1	425.457	AMEXG_0030049678	+	PGSH01096053.1
chr1	425.457	AMEXG_0030117437	+	PGSH01045194.1
chr1	425.457	AMEXG_0030092006	+	PGSH01005953.1
chr1	425.457	AMEXG_0030014816	+	PGSH01017761.1
chr1	425.457	AMEXG_0030089799	+	PGSH01122851.1
chr1	427.585	AMEXG_0030002740	+	PGSH01047818.1
chr1	427.585	AMEXG_0030059878	+	PGSH01096155.1
chr1	427.585	AMEXG_0030005134	+	PGSH01040300.1
chr1	427.585	AMEXG_0030055539	+	PGSH01047089.1
chr1	427.585	AMEXG_0030063888	+	PGSH01108765.1
chr1	427.585	AMEXG_0030001835	+	PGSH01041524.1
chr1	427.585	AMEXG_0030025173	+	PGSH01089523.1
chr1	429.713	AMEXG_0030001783	+	PGSH01101859.1
chr1	429.713	AMEXG_0030120389	+	PGSH01110587.1
chr1	434.063	AMEXG_0030002467	+	PGSH01081754.1
chr1	436.191	AMEXG_0030066801	+	PGSH01125135.1
chr1	436.191	AMEXG_0030046649	+	PGSH01059570.1
chr1	436.191	AMEXG_0030002409	+	PGSH01008831.1
chr1	436.191	AMEXG_0030001516	+	PGSH01017628.1
chr1	436.191	AMEXG_0030000102	+	PGSH01001260.1
chr1	436.191	AMEXG_0030066314	+	PGSH01015760.1
chr1	436.191	AMEXG_0030101175	+	PGSH01092797.1
chr1	436.191	AMEXG_0030000357	+	PGSH01070420.1
chr1	436.191	AMEXG_0030004324	+	PGSH01027720.1
chr1	436.191	AMEXG_0030002134	+	PGSH01040270.1
chr1	436.191	AMEXG_0030035692	+	PGSH01113511.1
chr1	436.191	AMEXG_0030119413	+	PGSH01015033.1
chr1	436.191	AMEXG_0030012792	+	PGSH01113282.1
chr1	438.319	AMEXG_0030067811	+	PGSH01012001.1
chr1	438.319	AMEXG_0030117107	+	PGSH01007462.1
chr1	438.319	AMEXG_0030008193	+	PGSH01114493.1
chr1	438.319	AMEXG_0030036826	+	PGSH01030561.1
chr1	438.319	AMEXG_0030069075	+	PGSH01092476.1
chr1	438.319	AMEXG_0030009477	+	PGSH01094394.1
chr1	438.319	AMEXG_0030077505	+	PGSH01004550.1
chr1	438.319	AMEXG_0030046458	+	PGSH01070881.1
chr1	438.319	AMEXG_0030033686	+	PGSH01105949.1
chr1	438.319	AMEXG_0030112416	+	PGSH01018737.1
chr1	438.319	AMEXG_0030013990	+	PGSH01110780.1
chr1	438.319	AMEXG_0030045875	+	PGSH01092244.1
chr1	438.319	AMEXG_0030013678	+	PGSH01095693.1
[truncated: 25,676 more rows]
