# Supplementary material for: A chromosome-scale assembly of the axolotl genome
Source: HighWire-hosted journal article supplement (doi:10.1101/gr.241901.118), 2019-01-24
Supplement: Supplemental_Table_3.xlsx [file Supplemental_Table_3.xlsx]

## Sheet: Sheet1
Supplementary Table 3 - Summary statistics for assembled chromosomes.
chromosome	map length (cM)	gigabases assembled	scaffolds placed	polymorphisms detected
chr1	597.91	2.95653	2970	1284172
chr2	626.729	2.9242	2899	1335585
chr3	469.024	2.49683	2208	1114825
chr4	416.272	2.4549	2486	962411
chr5	581.979	2.6311	3004	1091929
chr6	528.341	3.13794	3338	1269400
chr7	449.359	2.02997	1942	794142
chr8	335.127	1.71151	1677	756893
chr9	299.575	1.49614	1491	645291
chr10	307.562	1.64001	1615	696269
chr11	234.164	1.43717	1460	681472
chr12	250.194	1.21114	1080	504031
chr13	140.332	0.719773	830	317439
chr14	127.026	0.658323	674	293101
Total	5363.59	27.5055	27674	11746960
