# Supplementary material for: A chromosome-scale assembly of the axolotl genome
Source: HighWire-hosted journal article supplement (doi:10.1101/gr.241901.118), 2019-01-24
Supplement: Supplemental_Table_4.xlsx [file Supplemental_Table_4.xlsx]

## Sheet: Sheet1
Supplementary Table 4 - an axolotl / Xenopus comparative map.
A. mexicanum				X. tropicalis v9.0
gene	chromosome	Position (cM)		gene	chromosome	start position
AMEXTC_0340000056697_LOC102259710	chr1	0		LOC100486661	scaffold_499	13865
AMEXTC_0340000056697_LOC102259710	chr1	0		LOC100491165-like	Chr08	98050927
AMEXTC_0340000056697_LOC102259710	chr1	0		LOC101730261	Chr09	29735367
AMEXTC_0340000178868_LOC107737464	chr1	0		LOC101732880-like	scaffold_2243	362
AMEXTC_0340000060302_ZNF282	chr1	0		LOC101733135	scaffold_211	81329
AMEXTC_0340000178868_LOC107737464	chr1	0		LOC101733761	scaffold_2371	3589
AMEXTC_0340000178868_LOC107737464	chr1	0		Xetrov90001667m	Chr01	86198601
AMEXTC_0340000056697_LOC102259710	chr1	0		Xetrov90015408m	Chr06	482395
AMEXTC_0340000212996_FIS1	chr1	2.128		fis1	Chr03	134716060
AMEXTC_0340000179149_LOC101944500	chr1	2.128		LOC100486661	scaffold_499	13865
AMEXTC_0340000064191_LOC110322417	chr1	2.128		LOC100491165-like	Chr08	98050927
AMEXTC_0340000190645_LOC102376062	chr1	2.128		LOC100491165-like	Chr08	98050927
AMEXTC_0340000190639_LOC100619372	chr1	2.128		LOC100491165-like	Chr08	98050927
AMEXTC_0340000161279_Zfp982	chr1	2.128		LOC101730261	Chr09	29735367
AMEXTC_0340000161279_Zfp982	chr1	2.128		LOC101732837	Chr06	899875
AMEXTC_0340000179149_LOC101944500	chr1	2.128		LOC101732837	Chr06	899875
AMEXTC_0340000196330_LOC105750141	chr1	2.128		LOC101732837	Chr06	899875
AMEXTC_0340000147962_BIRC7	chr1	2.128		LOC101733829	Chr08	27674943
AMEXTC_0340000016453_LOC107118174	chr1	2.128		LOC734020	Chr03	134611102
AMEXTC_0340000290800_pcolce.L	chr1	2.128		pcolce2	Chr05	116412619
AMEXTC_0340000053817_nucleotide-binding	chr1	2.128		spen	scaffold_430	55639
AMEXTC_0340000013990_nucleotide-binding	chr1	2.128		spen	scaffold_430	55639
AMEXTC_0340000058019_nucleotide-binding	chr1	2.128		spen	scaffold_430	55639
AMEXTC_0340000277558_nucleotide-binding	chr1	2.128		spen	scaffold_430	55639
AMEXTC_0340000062409_CHRNE	chr1	4.255		chrng	Chr05	109008986
AMEXTC_0340000256979_dnaJ-like	chr1	4.255		dnajb14	Chr01	65029186
AMEXTC_0340000003970_EPHB4	chr1	4.255		ephb1	Chr05	126944240
AMEXTC_0340000024401_CD68	chr1	4.255		lamp1	Chr02	112419474
AMEXTC_0340000024401_CD68	chr1	4.255		lamp2	Chr08	24855484
AMEXTC_0340000018095_LOC109918324	chr1	4.255		LOC100497556	scaffold_143	37904
AMEXTC_0340000275208_LOC109916070	chr1	4.255		mb21d2	Chr05	98705903
AMEXTC_0340000200405_eif4e2rs1	chr1	4.255		MGC89871	Chr05	109031074
AMEXTC_0340000211426_LOC101396116	chr1	4.255		mink1	scaffold_143	222072
AMEXTC_0340000136241_pld2	chr1	4.255		pld2	Chr03	134157196
AMEXTC_0340000006529_LOC108799996	chr1	4.255		sbk1	Chr07	95496307
AMEXTC_0340000187406_SENP3	chr1	4.255		senp5	Chr05	97992483
AMEXTC_0340000230061_SLC25A11	chr1	4.255		slc25a11	scaffold_143	123014
AMEXTC_0340000284685_SRRT	chr1	4.255		srrt	scaffold_1035	7362
AMEXTC_0340000301492_psmb6.L	chr1	4.255		Xetrov90010065m	Chr03	134507933
AMEXTC_0340000005610_hypothetical	chr1	4.255		Xetrov90026353m	scaffold_143	117628
AMEXTC_0340000131485_CHRNB1	chr1	8.606		chrnb2	scaffold_553	555
AMEXTC_0340000131485_CHRNB1	chr1	8.606		chrng	Chr05	109008986
AMEXTC_0340000181135_LOC108711825	chr1	8.606		LOC100489273	Chr05	117678530
AMEXTC_0340000056824_LOC102694791	chr1	8.606		plscr1	Chr05	117734389
AMEXTC_0340000181135_LOC108711825	chr1	8.606		plscr1	Chr05	117734389
AMEXTC_0340000016669_sat2	chr1	8.606		sat1	Chr02	38778821
AMEXTC_0340000180359_LOC109993265	chr1	8.606		sat1	Chr02	38778821
AMEXTC_0340000289383_acap1	chr1	10.734		acap2-like	Chr05	97630113
AMEXTC_0340000028312_LOC102364374	chr1	10.734		atp13a3	Chr05	97214098
AMEXTC_0340000199364_hypothetical	chr1	10.734		atp1b2	scaffold_393	31787
AMEXTC_0340000005584_BCL6B	chr1	10.734		bcl6	Chr05	100716062
AMEXTC_0340000066162_LOC106553141	chr1	10.734		gnb1	Chr07	71155128
AMEXTC_0340000066162_LOC106553141	chr1	10.734		gnb4	Chr05	95147889
AMEXTC_0340000210831_LOC102365065	chr1	10.734		lpp	Chr05	100250293
AMEXTC_0340000277490_LOC107118085	chr1	10.734		pik3ca	Chr05	95013325
AMEXTC_0340000146267_polr2a	chr1	10.734		polr2a	scaffold_376	40031
AMEXTC_0340000194474_slc16a13	chr1	10.734		slc16a6-like	scaffold_443	29690
AMEXTC_0340000050024_LOC108801593	chr1	10.734		st8sia6	Chr06	20250034
AMEXTC_0340000031514_TFR2	chr1	10.734		tfrc	Chr05	35252697
AMEXTC_0340000152265_TNK1	chr1	10.734		tnk2	Chr05	109822499
AMEXTC_0340000237340_tumor	chr1	10.734		tp53	scaffold_393	45270
AMEXTC_0340000038754_LOC102355217	chr1	10.734		zbtb38	Chr05	125792901
AMEXTC_0340000059708_LOC101947837	chr1	10.734		Xetrov90014625m	Chr05	109555288
AMEXTC_0340000202253_cldn7.L	chr1	13.507		cldn7	scaffold_1648	6932
AMEXTC_0340000032393_DLG4	chr1	13.507		dlg1	Chr05	97802612
AMEXTC_0340000291920_LOC109922709	chr1	13.507		dvl3	Chr05	110861781
AMEXTC_0340000185794_GIGYF1	chr1	13.507		gigyf1	scaffold_523	71426
AMEXTC_0340000022798_SLC2A4	chr1	13.507		slc2a2	Chr05	107483881
AMEXTC_0340000227188_acadvl	chr1	13.507		Xetrov90025933m	scaffold_1134	11606
AMEXTC_0340000228437_ARHGEF15	chr1	19.487		ngef-like	Chr05	123131367
AMEXTC_0340000148081_ZNHIT1	chr1	19.487		znhit1	Chr03	136889253
AMEXTC_0340000040772_LOC108711805	chr1	19.487		Xetrov90029786m	scaffold_615	51444
AMEXTC_0340000180969_KDM6B	chr1	21.615		jmjd3	scaffold_561	45069
AMEXTC_0340000145054_RANGRF	chr1	21.615		rangrf-like	scaffold_143	134256
AMEXTC_0340000192777_zpy1	chr1	21.615		zpy1	scaffold_143	145642
AMEXTC_0340000275598_wrap53	chr1	21.615		Xetrov90026359m	scaffold_143	209843
AMEXTC_0340000116392_CHD5	chr1	23.743		chd5-like.2	Chr07	90343487
AMEXTC_0340000223092_LOC110087748	chr1	23.743		cyb5d1	scaffold_561	574
AMEXTC_0340000037441_EFNB3	chr1	23.743		efnb2	Chr02	114968756
AMEXTC_0340000190627_dnah2.L	chr1	23.743		Xetrov90027922m	scaffold_302	70223
AMEXTC_0340000046206_COPS6	chr1	25.87		cops6-like	scaffold_48	86084
AMEXTC_0340000195994_LOC108711750	chr1	25.87		gal3st4-like.1	scaffold_48	316570
AMEXTC_0340000132117_LOC108788008	chr1	25.87		LOC100494139	scaffold_48	256228
AMEXTC_0340000024291_LOXe	chr1	25.87		LOC100494416	scaffold_304	76747
AMEXTC_0340000112991_LOC108788008	chr1	25.87		LOC100494462	scaffold_48	283515
AMEXTC_0340000126802_LOC108710460	chr1	25.87		LOC100494672	Chr03	133812524
AMEXTC_0340000043266_LOC108711764	chr1	25.87		LOC100496654	Chr03	132010387
AMEXTC_0340000046585_LOC105357518	chr1	25.87		Xetrov90024563m	Chr09	79379071
AMEXTC_0340000220946_LOXe	chr1	25.87		Xetrov90027934m	scaffold_304	97956
AMEXTC_0340000024291_LOXe	chr1	25.87		Xetrov90027934m	scaffold_304	97956
AMEXTC_0340000112991_LOC108788008	chr1	25.87		Xetrov90028990m	scaffold_48	209351
AMEXTC_0340000192652_LOC102358281	chr1	29.131		LOC100490281	scaffold_48	4984
AMEXTC_0340000031321_acetylcholinesterase	chr1	32.347		LOC100495889	Chr05	102167336
AMEXTC_0340000044360_period	chr1	32.347		per2	Chr05	124596667
AMEXTC_0340000220775_AP1S1	chr1	36.697		LOC101734726	scaffold_48	898547
AMEXTC_0340000017531_NAT16	chr1	36.697		nat16	scaffold_48	657496
AMEXTC_0340000233155_alox12	chr1	41.048		alox5-like	Chr07	31833046
AMEXTC_0340000004904_APC2	chr1	41.048		apc2	Chr01	80479519
AMEXTC_0340000193929_clg2h17orf49	chr1	41.048		c17orf49	Chr03	131324310
AMEXTC_0340000046518_MOGAT3	chr1	41.048		dgat2	Chr02	169548535
AMEXTC_0340000235091_GAMT	chr1	41.048		gamt	Chr01	80577632
AMEXTC_0340000009530_plk2	chr1	41.048		LOC100487804	Chr01	80347014
AMEXTC_0340000163637_LOC102942052	chr1	41.048		mum1	Chr01	80601662
AMEXTC_0340000229420_ndufs7	chr1	41.048		ndufs7	Chr01	80590368
AMEXTC_0340000189632_PCSK4	chr1	41.048		pcsk4	Chr01	80419484
AMEXTC_0340000260392_REEP6	chr1	41.048		reep6	Chr01	80453085
AMEXTC_0340000139577_SGTA	chr1	41.048		sgta	Chr01	80308197
AMEXTC_0340000058621_THOP1	chr1	41.048		thop1	Chr01	80322512
AMEXTC_0340000046369_ARRB2	chr1	41.048		Xetrov90029208m	scaffold_50	792029
AMEXTC_0340000265034_GADD45B	chr1	41.048		gadd45b-like	Chr01	80232562
AMEXTC_0340000191332_ABCA7	chr1	43.176		abca1	Chr01	107795208
AMEXTC_0340000283997_atp5d	chr1	43.176		atp5d	Chr01	81101472
AMEXTC_0340000061995_RNA-binding	chr1	43.176		cirbp	Chr01	81003945
AMEXTC_0340000046035_CIRBP	chr1	43.176		cirbp	Chr01	81003945
AMEXTC_0340000042142_CBARP	chr1	43.176		LOC100124991	Chr01	81112251
AMEXTC_0340000149133_MIDN	chr1	43.176		midn	Chr01	81072619
AMEXTC_0340000269400_STK11	chr1	43.176		stk11	Chr01	81121898
AMEXTC_0340000034770_ARHGAP45	chr1	43.176		hmha1	Chr01	81200285
AMEXTC_0340000172113_arid3a.S	chr1	47.526		arid3a	Chr01	81529718
AMEXTC_0340000247124_TMEM259	chr1	47.526		tmem259	Chr01	81416115
AMEXTC_0340000152283_WDR18	chr1	47.526		wdr18	Chr01	81495539
AMEXTC_0340000234473_R3HDM4	chr1	48.526		R3HDM4	.	.
AMEXTC_0340000164740_FSTL3	chr1	49.632		fstl3	Chr01	86773131
AMEXTC_0340000143126_LOC106541429	chr1	49.632		gzmh	Chr01	85231096
AMEXTC_0340000006407_MED16	chr1	49.632		med16	Chr01	81842115
AMEXTC_0340000057224_AZU1	chr1	49.632		prtn3-like.1	Chr01	81880293
AMEXTC_0340000064182_LOC108790337	chr1	49.632		prtn3-like.2	Chr01	86801295
AMEXTC_0340000179773_RNF126	chr1	49.632		rnf126	Chr01	86710924
AMEXTC_0340000241130_LOC102461656	chr1	53.982		LOC100491613	Chr08	100970363
AMEXTC_0340000241130_LOC102461656	chr1	53.982		LOC100495401-like	Chr04	28537459
AMEXTC_0340000241130_LOC102461656	chr1	53.982		LOC100496561	scaffold_472	100539
AMEXTC_0340000241130_LOC102461656	chr1	53.982		Xetrov90001666m	Chr01	86195277
AMEXTC_0340000241130_LOC102461656	chr1	53.982		Xetrov90001667m	Chr01	86198601
AMEXTC_0340000226860_AES	chr1	56.11		aes	Chr01	102426855
AMEXTC_0340000225354_LOC106556348	chr1	56.11		gnaq	Chr01	120231174
AMEXTC_0340000044385_LOC107120597	chr1	56.11		gzmh	Chr01	85231096
AMEXTC_0340000239665_PLPP2	chr1	56.11		ppap2c	Chr01	102306498
AMEXTC_0340000016162_S1PR4	chr1	56.11		s1pr4	Chr01	102272964
AMEXTC_0340000018008_LOC109925183	chr1	56.11		tle2	Chr01	102359248
AMEXTC_0340000022532_B3GNT3	chr1	58.238		b3gnt3-like	Chr01	98928312
AMEXTC_0340000195991_FCHO1	chr1	58.238		fcho1	Chr01	99026014
AMEXTC_0340000163779_B3GNT3	chr1	58.238		LOC100145701	Chr01	99166688
AMEXTC_0340000022532_B3GNT3	chr1	58.238		LOC100145701	Chr01	99166688
AMEXTC_0340000008918_LOC108442439	chr1	58.238		LOC101734987	Chr01	125357764
AMEXTC_0340000223620_LOC109320532	chr1	58.238		rgmb	Chr01	173550726
AMEXTC_0340000171768_ANO8	chr1	60.347		ano8-like	Chr01	101240545
AMEXTC_0340000018458_CILP2	chr1	60.347		cilp	Chr03	117793133
AMEXTC_0340000132644_TM6SF2	chr1	60.347		tm6sf2	Chr01	101904360
AMEXTC_0340000221817_ARMC6	chr1	62.475		armc6	Chr01	102124597
AMEXTC_0340000063183_hypothetical	chr1	62.475		cherp	Chr01	100132440
AMEXTC_0340000161533_ddx49	chr1	62.475		ddx49	Chr01	100443086
AMEXTC_0340000228567_EPS15L1	chr1	62.475		eps15l1	Chr01	100166932
AMEXTC_0340000050926_f2rl3	chr1	62.475		f2rl3	Chr01	99837697
AMEXTC_0340000222861_GDF1	chr1	62.475		gdf3	Chr01	100373451
AMEXTC_0340000242937_haus8	chr1	62.475		haus8	Chr01	99918670
AMEXTC_0340000038954_MYO9B	chr1	62.475		myo9b	Chr01	99937105
AMEXTC_0340000002761_NWD1	chr1	62.475		nwd1	Chr01	99758956
AMEXTC_0340000058550_LOC110159790	chr1	62.475		phactr1	Chr06	85722977
AMEXTC_0340000161508_RFXANK	chr1	62.475		rfxank-like	Chr01	101651528
AMEXTC_0340000196387_SIN3B	chr1	62.475		sin3b	Chr01	99793583
AMEXTC_0340000235243_sugp2.L	chr1	62.475		sugp2	Chr01	102133978
AMEXTC_0340000123582_SUGP2	chr1	62.475		sugp2	Chr01	102133978
AMEXTC_0340000176300_SUGP2	chr1	62.475		sugp2	Chr01	102133978
AMEXTC_0340000184453_TMEM161A	chr1	62.475		tmem161a	Chr01	102084590
AMEXTC_0340000080842_TMEM38A	chr1	62.475		tmem38a	Chr01	100044292
AMEXTC_0340000246044_ARHGEF18	chr1	64.603		arhgef18-like	Chr01	84157660
AMEXTC_0340000159136_crtc1	chr1	64.603		crtc1-like	Chr01	87905418
AMEXTC_0340000030695_ELL	chr1	64.603		ell	Chr01	87372118
AMEXTC_0340000244968_LOC104347692	chr1	64.603		enc1.2	Chr01	84244041
AMEXTC_0340000227578_INSR	chr1	64.603		insr	Chr01	99611132
AMEXTC_0340000178425_KLHL26	chr1	64.603		klhl26-like	Chr01	87859248
AMEXTC_0340000193046_LOC100485024	chr1	64.603		LOC100485024	Chr01	84297994
AMEXTC_0340000024449_reverse	chr1	64.603		mast3-like	Chr01	85017763
AMEXTC_0340000198767_trex2.S	chr1	64.603		trex2	Chr08	2294751
AMEXTC_0340000169068_PTPRS	chr1	66.731		ptprs	Chr01	72530552
AMEXTC_0340000026567_LOC102948310	chr1	68.859		ctsv	Chr01	123183730
AMEXTC_0340000256845_UHRF1	chr1	68.859		LOC100124801	Chr01	114558042
AMEXTC_0340000291946_TNFAIP8L1	chr1	68.859		tnfaip8	Chr01	162017162
AMEXTC_0340000136669_CACTIN	chr1	73.115		cactin	Chr01	74559688
AMEXTC_0340000066413_EEF2	chr1	73.115		eef2.1	Chr01	74239834
AMEXTC_0340000066413_EEF2	chr1	73.115		eef2.2	Chr01	193163453
AMEXTC_0340000168316_FSD1	chr1	73.115		fsd1	Chr01	75082335
AMEXTC_0340000082534_Fizzy-related	chr1	73.115		fzr1	scaffold_72	284546
AMEXTC_0340000049334_HAUS8	chr1	73.115		haus8	Chr01	99918670
AMEXTC_0340000167109_DOHH	chr1	73.115		LOC100145112	Chr01	79084946
AMEXTC_0340000035564_SHD	chr1	73.115		LOC100489262	Chr01	102542493
AMEXTC_0340000026593_LOC102948209	chr1	73.115		malt1	Chr01	188360428
AMEXTC_0340000055291_MATK	chr1	73.115		matk	Chr01	74337570
AMEXTC_0340000233522_MBD3	chr1	73.115		mbd3	Chr01	79746190
AMEXTC_0340000195705_MFSD12	chr1	73.115		mfsd12	Chr01	74074214
AMEXTC_0340000179364_MPND	chr1	73.115		mpnd	Chr01	75016318
AMEXTC_0340000240330_LOC104481215	chr1	73.115		myo5b	Chr01	191843036
AMEXTC_0340000227914_NFIC	chr1	73.115		nfic	Chr01	79132147
AMEXTC_0340000000450_LOC102361187	chr1	73.115		phactr1	Chr06	85722977
AMEXTC_0340000121380_STAP2	chr1	73.115		stap2-like	Chr01	75070120
AMEXTC_0340000224101_TJP3	chr1	73.115		tjp3-like	Chr01	74416130
AMEXTC_0340000140180_Ubxn6	chr1	73.115		ubxn6	Chr01	74902024
AMEXTC_0340000179131_ZBTB7A	chr1	73.115		zbtb7c	Chr01	192640895
AMEXTC_0340000174501_ABHD17A	chr1	77.465		abhd17a	Chr01	79338399
AMEXTC_0340000229359_atp8b3.L	chr1	77.465		atp8b3	Chr01	79408984
AMEXTC_0340000196209_KLF16	chr1	77.465		klf13	Chr03	87113687
AMEXTC_0340000054927_CUNH19orf35	chr1	77.465		LOC100486686	Chr01	89906047
AMEXTC_0340000003246_REXO1	chr1	77.465		rexo1-like	Chr01	79366314
AMEXTC_0340000013886_LOC102347076	chr1	77.465		zfand5	Chr01	118277788
AMEXTC_0340000027954_acsbg2	chr1	81.816		acsbg2	Chr01	82950824
AMEXTC_0340000175643_LONP1	chr1	81.816		LOC100492505	Chr01	82525693
AMEXTC_0340000051319_LOC102939947	chr1	81.816		LOC100494822	Chr01	83305454
AMEXTC_0340000002440_LOC109085450	chr1	81.816		LOC101732820	scaffold_1879	6770
AMEXTC_0340000174920_MLLT1	chr1	81.816		mllt1	Chr01	82974076
AMEXTC_0340000015740_ZAP70	chr1	81.816		syk	Chr01	126264199
AMEXTC_0340000065174_tmprss9	chr1	81.816		tmprss9	Chr01	73951201
AMEXTC_0340000242651_VMAC	chr1	81.816		vmac	Chr01	82768395
AMEXTC_0340000039935_FBN3	chr1	83.944		fbn3	Chr01	73533826
AMEXTC_0340000051595_LOC101952039	chr1	83.944		gzmh	Chr01	85231096
AMEXTC_0340000045940_LOC101952458	chr1	83.944		LOC100498358	Chr03	80404294
AMEXTC_0340000058743_LOC103183500	chr1	86.072		adam10	Chr03	89392633
AMEXTC_0340000256562_LOC103198887	chr1	86.072		LOC100486661	scaffold_499	13865
AMEXTC_0340000172122_LOC102455588	chr1	86.072		LOC100486661	scaffold_499	13865
AMEXTC_0340000256562_LOC103198887	chr1	86.072		LOC100491165-like	Chr08	98050927
AMEXTC_0340000256562_LOC103198887	chr1	86.072		LOC100491165-like	Chr08	98050927
AMEXTC_0340000173644_ZNF3	chr1	86.072		LOC100491165-like	Chr08	98050927
AMEXTC_0340000256562_LOC103198887	chr1	86.072		Xetrov90029323m	scaffold_53	10441
AMEXTC_0340000256562_LOC103198887	chr1	86.072		Xetrov90029323m	scaffold_53	10441
AMEXTC_0340000023981_ADAMTSL4	chr1	88.2		adamtsl4	Chr08	106754257
AMEXTC_0340000060215_anxa9.L	chr1	88.2		anxa9	Chr08	106137096
AMEXTC_0340000195582_CERS2	chr1	88.2		cers2	Chr08	106088206
AMEXTC_0340000045117_KANK3	chr1	88.2		kank3	Chr01	82339047
AMEXTC_0340000067017_HNRNPM	chr1	88.2		LOC100489127-like	Chr01	73332739
AMEXTC_0340000030666_lpl	chr1	88.2		lpl	Chr01	77718946
AMEXTC_0340000034445_RPRD2	chr1	88.2		rprd2-like	Chr08	107013126
AMEXTC_0340000067197_rps28p9	chr1	88.2		rps28p9	Chr01	82323812
AMEXTC_0340000274036_TIMM44	chr1	88.2		timm44	Chr01	73395692
AMEXTC_0340000214412_GABPB2	chr1	90.328		gabpb1	Chr03	95053623
AMEXTC_0340000221856_sema6c	chr1	90.328		sema6c	Chr08	114243136
AMEXTC_0340000000162_IFIH1	chr1	90.328		Xetrov90024340m	Chr09	66898823
AMEXTC_0340000031330_ASH1L	chr1	92.456		ash1l	scaffold_1242	2174
AMEXTC_0340000003807_CLK2	chr1	92.456		clk2-like.1	Chr08	117594984
AMEXTC_0340000054822_DAP3	chr1	92.456		dap3	scaffold_601	46884
AMEXTC_0340000227601_GON4L	chr1	92.456		gon4l	scaffold_601	643
AMEXTC_0340000188737_SYT11	chr1	92.456		LOC101731321	scaffold_5546	1384
AMEXTC_0340000120585_LOC102934296	chr1	92.456		LOC496746	Chr07	101484199
AMEXTC_0340000016012_LOC107086885	chr1	92.456		phactr1	Chr06	85722977
AMEXTC_0340000213456_SCAMP3	chr1	92.456		scamp1	Chr01	164207730
AMEXTC_0340000220995_SLC50A1	chr1	92.456		slc50a1	scaffold_2482	1820
AMEXTC_0340000024606_TRIM46	chr1	92.456		trim36	Chr01	134045034
AMEXTC_0340000026214_thbs3.L	chr1	92.456		Xetrov90026956m	scaffold_1932	2671
AMEXTC_0340000213474_myo1e.2	chr1	98.925		myo1e.2	scaffold_532	74612
AMEXTC_0340000005751_selenium	chr1	98.925		selenbp1	scaffold_273	40517
AMEXTC_0340000157925_selenium	chr1	98.925		selenbp1	scaffold_273	40517
AMEXTC_0340000009588_double-stranded	chr1	101.053		adar	scaffold_553	11761
AMEXTC_0340000157591_ATP8B2	chr1	101.053		atp8b4	Chr03	94531287
AMEXTC_0340000213144_LOC107543893	chr1	101.053		c1orf43	scaffold_351	28693
AMEXTC_0340000010441_CHRNB2	chr1	101.053		chrnb2	scaffold_553	555
AMEXTC_0340000054554_LOC108645280	chr1	101.053		LOC100491909	Chr05	4603608
AMEXTC_0340000021010_NPR1	chr1	101.053		LOC100492092	scaffold_703	25417
AMEXTC_0340000213143_UBAP2L	chr1	101.053		LOC101731716-like	scaffold_351	16549
AMEXTC_0340000159420_LOC102350161	chr1	101.053		slc27a6	Chr01	158933233
AMEXTC_0340000132661_TPM3	chr1	101.053		Xetrov90008553m	Chr03	81946359
AMEXTC_0340000012304_CELF3	chr1	101.053		Xetrov90027706m	scaffold_273	207046
AMEXTC_0340000121204_CA14	chr1	105.404		ca14	Chr08	111966709
AMEXTC_0340000179317_CDYL2	chr1	107.532		cdyl2	Chr04	55427916
AMEXTC_0340000023172_CENPN	chr1	107.532		cenpn	Chr04	55384993
AMEXTC_0340000009370_GnRH	chr1	107.532		gnrhr	Chr08	117550160
AMEXTC_0340000055829_ITGA10	chr1	107.532		itga10	Chr08	116980519
AMEXTC_0340000055829_ITGA10	chr1	107.532		itga11	Chr03	116446174
AMEXTC_0340000169427_OTUD7B	chr1	107.532		otud7b	Chr08	107679289
AMEXTC_0340000019744_POLR3GL	chr1	107.532		polr3gl	Chr08	107180256
AMEXTC_0340000059749_RNF115	chr1	107.532		rnf115	Chr08	116962926
AMEXTC_0340000202142_SF3B4	chr1	107.532		sf3b4	Chr08	107610819
AMEXTC_0340000203086_SSR2	chr1	107.532		ssr2	scaffold_359	22608
AMEXTC_0340000032593_SV2A	chr1	107.532		sv2a	Chr08	107524547
AMEXTC_0340000049369_NUDT7	chr1	113.916		nudt7-like	Chr04	57171770
AMEXTC_0340000031155_VAT1L	chr1	113.916		vat1l	Chr04	57105981
AMEXTC_0340000014918_CDH8	chr1	116.044		cdh8	Chr04	58368696
AMEXTC_0340000240257_CCDC102A	chr1	118.172		ccdc102a	Chr04	28198371
AMEXTC_0340000024612_CPNE2	chr1	118.172		cpne2-like	Chr04	53858129
AMEXTC_0340000054462_ELMO3	chr1	118.172		elmo1	Chr10	14374232
AMEXTC_0340000033482_EXOC3L1	chr1	118.172		exoc3l1	Chr04	28351547
AMEXTC_0340000014280_ADGRG1	chr1	118.172		gpr56	Chr04	28107041
AMEXTC_0340000214307_KIAA0895L	chr1	118.172		kiaa0895l	Chr04	28329854
AMEXTC_0340000015632_CA7	chr1	118.172		pdp2	Chr04	69426155
AMEXTC_0340000202542_PLA2G15	chr1	118.172		pla2g15-like	Chr04	44065599
AMEXTC_0340000064147_Ras	chr1	118.172		rrad	Chr04	69542809
AMEXTC_0340000018946_LOC104575536	chr1	118.172		slc7a6	Chr04	49583528
AMEXTC_0340000046162_SMPD3	chr1	118.172		smpd3-like	Chr04	49860482
AMEXTC_0340000145837_AARS	chr1	120.3		aars	Chr04	26892422
AMEXTC_0340000190751_atp6v0d1.L	chr1	120.3		atp6v0d1	Chr04	51693569
AMEXTC_0340000158609_BCAR1	chr1	120.3		bcar1	Chr04	51234279
AMEXTC_0340000128130_LOC108715072	chr1	120.3		ctrb1	Chr04	43574029
AMEXTC_0340000122336_ctrl	chr1	120.3		ctrb2	Chr04	43598776
AMEXTC_0340000122336_ctrl	chr1	120.3		ctrl	Chr04	43609871
AMEXTC_0340000180261_EDC4	chr1	120.3		edc4-like	Chr04	43966522
AMEXTC_0340000039064_RIPOR1	chr1	120.3		fam65a-like	Chr04	43711147
AMEXTC_0340000043737_LOC109310426	chr1	120.3		fbln7	Chr05	38921002
AMEXTC_0340000179841_fhod1.L	chr1	120.3		fhod1	Chr04	26361211
AMEXTC_0340000154261_CMTR2	chr1	120.3		ftsjd1	Chr04	27479825
AMEXTC_0340000040793_FUK	chr1	120.3		fuk-like	Chr04	26979030
AMEXTC_0340000185695_GFOD2	chr1	120.3		gfod2	Chr04	43915240
AMEXTC_0340000241667_HSD11B2	chr1	120.3		hsd11b2	Chr04	51645381
AMEXTC_0340000243066_hydin	chr1	120.3		hydin	Chr04	27332597
AMEXTC_0340000231663_hydin	chr1	120.3		hydin	Chr04	27332597
AMEXTC_0340000180947_KATNB1	chr1	120.3		katnb1	Chr04	28039297
AMEXTC_0340000020776_KIFC3	chr1	120.3		kifc3	Chr04	28017015
AMEXTC_0340000003662_lcat	chr1	120.3		lcat	Chr04	28554684
AMEXTC_0340000026836_ldhd.L	chr1	120.3		ldhd	Chr04	28518719
AMEXTC_0340000020776_KIFC3	chr1	120.3		LOC100485082	Chr06	133846472
AMEXTC_0340000073995_LOC102932553	chr1	120.3		LOC100486661	scaffold_499	13865
AMEXTC_0340000073995_LOC102932553	chr1	120.3		LOC100491165-like	Chr08	98050927
AMEXTC_0340000014167_LOC102354830	chr1	120.3		LOC100495245	Chr04	28571280
AMEXTC_0340000073995_LOC102932553	chr1	120.3		LOC100496443	Chr08	101287651
AMEXTC_0340000128130_LOC108715072	chr1	120.3		LOC101733231	Chr04	43583954
AMEXTC_0340000129071_LOC101735296	chr1	120.3		LOC101735296	Chr05	53010872
AMEXTC_0340000172936_LOC108800614	chr1	120.3		MGC147117	Chr04	51790242
AMEXTC_0340000031622_LOC108800614	chr1	120.3		MGC147117	Chr04	51790242
AMEXTC_0340000012434_MTSS1L	chr1	120.3		mtss1l-like	Chr04	27145784
AMEXTC_0340000231457_PLEKHG4	chr1	120.3		plekhg4	Chr04	26159645
AMEXTC_0340000057175_RASGRP3	chr1	120.3		rasgrp3	Chr05	57035371
AMEXTC_0340000222328_CARMIL2	chr1	120.3		rltpr-like	Chr04	43857106
AMEXTC_0340000195262_SETD6	chr1	120.3		setd6	Chr04	28293445
AMEXTC_0340000207987_sf3b3	chr1	120.3		sf3b3	Chr04	27024051
AMEXTC_0340000167970_SLC38A7	chr1	120.3		slc38a7	Chr04	27557682
AMEXTC_0340000206329_LOC102560429	chr1	120.3		snrk	Chr06	73144017
AMEXTC_0340000046640_TEPP	chr1	120.3		tepp	Chr04	27898344
AMEXTC_0340000176193_VAC14	chr1	120.3		vac14	Chr04	27232761
AMEXTC_0340000145871_WDR59	chr1	120.3		wdr59-like	Chr04	26562836
AMEXTC_0340000200642_LOC102931768	chr1	120.3		zpd	Chr04	28097902
AMEXTC_0340000006509_calb2.S	chr1	120.3		Xetrov90010767m	Chr04	27490127
AMEXTC_0340000216161_insulin	chr1	129.104		insrr	Chr08	110178257
AMEXTC_0340000056743_ISG20L2	chr1	129.104		isg20l2	Chr08	110937306
AMEXTC_0340000005700_nek2	chr1	129.104		nek2-like.2	Chr08	110084194
AMEXTC_0340000238255_LOC108699388	chr1	129.104		ntrk1	Chr08	110269335
AMEXTC_0340000014151_LOC108796764	chr1	129.104		Xetrov90022265m	Chr08	110403040
AMEXTC_0340000161884_LOC102946650	chr1	133.455		dusp23	Chr08	115126981
AMEXTC_0340000260738_EIF3F	chr1	133.455		eif3f	scaffold_105	157021
AMEXTC_0340000157570_ETHE1	chr1	133.455		ethe1	Chr07	110936307
AMEXTC_0340000192925_ILVBL	chr1	133.455		ilvbl	Chr07	69160860
AMEXTC_0340000058187_LOC101934233	chr1	133.455		LOC100486578	Chr08	115268337
AMEXTC_0340000270860_UFC1	chr1	133.455		LOC100487175	scaffold_506	10421
AMEXTC_0340000058187_LOC101934233	chr1	133.455		LOC100491706-like	Chr08	115448004
AMEXTC_0340000155464_LOC106705049	chr1	133.455		LOC100496228-like	Chr07	69301372
AMEXTC_0340000058187_LOC101934233	chr1	133.455		LOC101730955-like	Chr08	115495417
AMEXTC_0340000064900_TOMM40L	chr1	133.455		tomm40	Chr07	101385157
AMEXTC_0340000205828_LOC110391971	chr1	135.583		LOC100495066-like	Chr08	43656849
AMEXTC_0340000098131_Zfp182	chr1	135.583		LOC100495066-like	Chr08	43656849
AMEXTC_0340000225665_LOC104577560	chr1	135.583		LOC101731436	scaffold_3119	588
AMEXTC_0340000225665_LOC104577560	chr1	135.583		Xetrov90022661m	Chr09	2281333
AMEXTC_0340000233392_CETP	chr1	137.711		cetp	Chr04	54081858
AMEXTC_0340000044737_LOC108696826	chr1	137.711		etfb	Chr07	113400394
AMEXTC_0340000180537_MBTPS1	chr1	137.711		mbtps1	Chr04	50913141
AMEXTC_0340000044054_OSGIN1	chr1	137.711		osgin1	Chr04	50466574
AMEXTC_0340000211068_PLEKHG6	chr1	137.711		plekhg5	Chr07	91076172
AMEXTC_0340000245471_hypothetical	chr1	142.061		LOC101733353	scaffold_79	70515
AMEXTC_0340000123370_hypothetical	chr1	142.061		ncam1	Chr07	72411401
AMEXTC_0340000168581_usf2	chr1	142.061		usf2	scaffold_79	114053
AMEXTC_0340000165727_KMT2B	chr1	144.189		kmt2b	scaffold_37	1009952
AMEXTC_0340000164058_rbm42.S	chr1	144.189		rbm42	scaffold_37	1057710
AMEXTC_0340000182240_arhgap33	chr1	146.317		arhgap32-like	Chr07	66813105
AMEXTC_0340000182240_arhgap33	chr1	146.317		arhgap33	scaffold_37	915529
AMEXTC_0340000017329_kirrel2	chr1	146.317		kirrel2	scaffold_37	845950
AMEXTC_0340000082746_peptidylaminoacyl-L/D-isomerase	chr1	146.317		LOC101735028	scaffold_37	163676
AMEXTC_0340000277518_LOC110538136	chr1	146.317		Xetrov90018174m	Chr07	46703828
AMEXTC_0340000243728_LOC102946739	chr1	146.317		Xetrov90019631m	Chr07	116484263
AMEXTC_0340000082746_peptidylaminoacyl-L/D-isomerase	chr1	146.317		Xetrov90019631m	Chr07	116484263
AMEXTC_0340000301476_lin37	chr1	146.317		Xetrov90028385m	scaffold_37	979152
AMEXTC_0340000155844_LOC101942353	chr1	148.445		Xetrov90019631m	Chr07	116484263
AMEXTC_0340000204191_LOC108697889	chr1	148.445		Xetrov90019631m	Chr07	116484263
AMEXTC_0340000243727_FCGBP	chr1	148.445		Xetrov90019631m	Chr07	116484263
AMEXTC_0340000003048_LOC108696889	chr1	148.445		Xetrov90019631m	Chr07	116484263
AMEXTC_0340000007155_LOC101947369	chr1	148.445		Xetrov90019631m	Chr07	116484263
AMEXTC_0340000046190_GRAMD1A	chr1	152.701		gramd1b	Chr07	54854323
AMEXTC_0340000040710_LOC102356001	chr1	152.701		LOC100488472	scaffold_79	631512
AMEXTC_0340000125683_LOC108802257	chr1	152.701		LOC100498450	Chr09	53866584
AMEXTC_0340000180125_b4galt3	chr1	154.829		b4galt3-like.2	scaffold_171	177102
AMEXTC_0340000281079_FBL	chr1	154.829		fbl	Chr07	114665387
AMEXTC_0340000030944_FCGBP	chr1	154.829		LOC101732634	Chr05	98547539
AMEXTC_0340000014308_MAG	chr1	154.829		mag-like	Chr07	114741939
AMEXTC_0340000229014_LOC106542827	chr1	154.829		Xetrov90017985m	Chr07	36834473
AMEXTC_0340000008377_FCGBP	chr1	154.829		Xetrov90019631m	Chr07	116484263
AMEXTC_0340000008377_FCGBP	chr1	154.829		Xetrov90019631m	Chr07	116484263
AMEXTC_0340000038975_lrrc4b	chr1	157.957		lrrc4b	scaffold_642	44122
AMEXTC_0340000043097_lrrc4b	chr1	157.957		lrrc4b	scaffold_642	44122
AMEXTC_0340000039130_CLEC11A	chr1	177.495		clec11a	Chr07	102521457
AMEXTC_0340000260782_emc10	chr1	177.495		emc10	Chr07	102605014
AMEXTC_0340000064461_irf3.L	chr1	177.495		irf3	Chr07	102991864
AMEXTC_0340000275700_nosip.S	chr1	177.495		nosip	Chr07	102708991
AMEXTC_0340000174380_prr12	chr1	177.495		prr12-like	Chr07	102861401
AMEXTC_0340000251646_PRRG2	chr1	177.495		prrg4	Chr07	102754806
AMEXTC_0340000004400_rcn3.L	chr1	177.495		rcn3	Chr07	102695236
AMEXTC_0340000043279_RIC8A	chr1	177.495		ric8a	Chr07	103024126
AMEXTC_0340000137779_UTP18	chr1	177.495		utp18	Chr10	12796430
AMEXTC_0340000165493_fuz.L	chr1	181.845		fuz	Chr07	103407840
AMEXTC_0340000037385_MGC80611	chr1	181.845		LOC101734690	Chr07	103192497
AMEXTC_0340000227246_akt1s1	chr1	183.973		akt1s1	Chr07	103301661
AMEXTC_0340000188020_dhdh	chr1	183.973		dhdh-like.2	Chr07	105215165
AMEXTC_0340000060528_ferritin	chr1	183.973		fth1	Chr07	105405960
AMEXTC_0340000039464_LIN7B	chr1	183.973		lin7b	Chr07	109141278
AMEXTC_0340000018540_dusp8	chr1	183.973		LOC100036671	Chr07	109613603
AMEXTC_0340000164382_GYS1	chr1	183.973		LOC100490155-like	Chr07	105470197
AMEXTC_0340000213480_kif18b	chr1	183.973		LOC100490953-like	Chr07	105692469
AMEXTC_0340000177676_slc6a16.S	chr1	183.973		LOC100497867-like	Chr07	103729917
AMEXTC_0340000003267_LOC108792101	chr1	183.973		MGC147475	Chr07	109716727
AMEXTC_0340000155499_ferritin	chr1	183.973		MGC75752	Chr07	105423935
AMEXTC_0340000279781_pih1d1	chr1	183.973		pih1d1	Chr07	104834950
AMEXTC_0340000195189_pnkp.S	chr1	183.973		pnkp	Chr07	109592842
AMEXTC_0340000034112_ppfia3	chr1	183.973		ppfia2	Chr03	43174572
AMEXTC_0340000010521_slc17a8.L	chr1	183.973		slc17a7	Chr07	104717111
AMEXTC_0340000012370_TBC1D17	chr1	183.973		tbc1d17	Chr07	103659989
AMEXTC_0340000150741_tub	chr1	183.973		tub-like.2	scaffold_802	2278
AMEXTC_0340000150741_tub	chr1	183.973		tulp2	Chr07	105219579
AMEXTC_0340000199249_LOC108800660	chr1	183.973		Xetrov90019281m	Chr07	105241684
AMEXTC_0340000255010_PTH2	chr1	186.101		Xetrov90019262m	Chr07	104625954
AMEXTC_0340000267550_znf628.S	chr1	202.041		grwd1	Chr07	106931534
AMEXTC_0340000042317_LOC108696650	chr1	202.041		LOC100135243	Chr07	96893410
AMEXTC_0340000033394_LOC110390411	chr1	202.041		LOC100493492	Chr08	101899489
AMEXTC_0340000280142_LOC100493724	chr1	202.041		LOC100493724	Chr07	97771082
AMEXTC_0340000037137_LOC108789546	chr1	202.041		LOC100493774-like	Chr07	96392569
AMEXTC_0340000173618_myosin-10-like	chr1	202.041		LOC100493774-like	Chr07	96392569
AMEXTC_0340000033394_LOC110390411	chr1	202.041		LOC101733237	Chr08	102089998
AMEXTC_0340000056877_LOC104527945	chr1	202.041		LOC101733237	Chr08	102089998
AMEXTC_0340000033394_LOC110390411	chr1	202.041		LOC101733357	Chr08	102224020
AMEXTC_0340000003612_rasip1.S	chr1	202.041		rasip1-like	Chr07	97741645
AMEXTC_0340000218239_sbk1	chr1	202.041		sbk1	Chr07	95496307
AMEXTC_0340000029226_LOC101949312	chr1	202.041		srcrb4d	Chr02	90251249
AMEXTC_0340000029226_LOC101949312	chr1	202.041		srcrb4d	Chr02	90251249
AMEXTC_0340000053841_U2AF2	chr1	202.041		u2af2	Chr07	96607969
AMEXTC_0340000188273_ube2s.S	chr1	202.041		ube2s	Chr07	98182645
AMEXTC_0340000010997_ZNF579	chr1	202.041		znf865	Chr07	96693637
AMEXTC_0340000174983_ZNF865	chr1	202.041		znf865	Chr07	96693637
AMEXTC_0340000033394_LOC110390411	chr1	202.041		Xetrov90018992m	Chr07	95562874
AMEXTC_0340000033394_LOC110390411	chr1	202.041		Xetrov90019045m	Chr07	97023813
AMEXTC_0340000029226_LOC101949312	chr1	202.041		Xetrov90019045m	Chr07	97023813
AMEXTC_0340000019076_SULT2B1	chr1	202.041		Xetrov90019371m	Chr07	108918205
AMEXTC_0340000056877_LOC104527945	chr1	202.041		Xetrov90021996m	Chr08	101922954
AMEXTC_0340000033394_LOC110390411	chr1	202.041		Xetrov90026640m	scaffold_1609	1050
AMEXTC_0340000043306_dbp	chr1	204.169		dbp	Chr07	95612475
AMEXTC_0340000047869_ZNF423	chr1	204.169		znf423	Chr04	46965827
AMEXTC_0340000059067_ITFG1	chr1	206.297		itfg1	Chr04	25358192
AMEXTC_0340000103085_PHKB	chr1	206.297		phkb-like	Chr04	25471925
AMEXTC_0340000132475_SIAH1	chr1	206.297		siah1	Chr04	26043816
AMEXTC_0340000256850_LONP2	chr1	206.297		Xetrov90010731m	Chr04	26057632
AMEXTC_0340000207250_neto2.S	chr1	222.206		neto2	Chr04	25306454
AMEXTC_0340000080971_LOC101937707	chr1	222.206		uqcrfs1	Chr04	23989119
AMEXTC_0340000180260_LOC101937707	chr1	222.206		uqcrfs1	Chr04	23989119
AMEXTC_0340000027884_MYLK3	chr1	222.206		Xetrov90010712m	Chr04	25092171
AMEXTC_0340000292171_URI1	chr1	235.361		uri1	Chr04	23167944
AMEXTC_0340000036326_ZNF536	chr1	235.361		znf536	Chr04	22697475
AMEXTC_0340000009792_LOC104625553	chr1	235.361		znf536	Chr04	22697475
AMEXTC_0340000275217_naxe.L	chr1	237.489		apoa1bp	Chr08	111805654
AMEXTC_0340000195282_LOC102456231	chr1	237.489		ces2	Chr04	19126629
AMEXTC_0340000063799_GAN	chr1	237.489		gan	Chr04	55101203
AMEXTC_0340000240225_gpatch4.L	chr1	237.489		gpatch4	Chr08	111809908
AMEXTC_0340000066385_GPI	chr1	237.489		gpi	Chr04	19435870
AMEXTC_0340000046733_LMNA	chr1	237.489		lmnb2	Chr01	74015431
AMEXTC_0340000010586_BCAN	chr1	237.489		LOC100486298-like	Chr08	111207402
AMEXTC_0340000138613_LOC108714033	chr1	237.489		LOC100486741	Chr04	55269403
AMEXTC_0340000010478_PAQR6	chr1	237.489		paqr5	Chr03	116199709
AMEXTC_0340000039619_LOC107214511	chr1	237.489		rab11a	Chr03	117367989
AMEXTC_0340000046196_LOC108802041	chr1	237.489		rhbg	Chr08	111308404
AMEXTC_0340000260710_SMG5	chr1	237.489		smg5-like.2	scaffold_848	1
AMEXTC_0340000215977_TTC24	chr1	237.489		ttc24	Chr08	111785239
AMEXTC_0340000208729_UBA2	chr1	237.489		uba2	Chr04	19265605
AMEXTC_0340000137902_UBQLN4	chr1	237.489		ubqln4	Chr08	111860322
AMEXTC_0340000260780_TMEM79	chr1	237.489		Xetrov90029418m	scaffold_546	69350
AMEXTC_0340000137772_DCAF8	chr1	239.617		dcaf8	Chr08	114972444
AMEXTC_0340000155970_LOC104062839	chr1	239.617		dnaja4.2	Chr08	111075757
AMEXTC_0340000241512_vacuolar	chr1	239.617		LOC101732689	scaffold_7602	75
AMEXTC_0340000059227_PEX19	chr1	239.617		pex19	Chr08	114995785
AMEXTC_0340000158726_ppox	chr1	239.617		ppox	Chr08	117370244
AMEXTC_0340000000874_NECTIN4	chr1	239.617		pvrl3	Chr02	50722106
AMEXTC_0340000015936_VANGL2	chr1	239.617		vangl2	Chr08	113935030
AMEXTC_0340000052620_NCSTN	chr1	239.617		Xetrov90022373m	Chr08	114086798
AMEXTC_0340000065510_LOC105862709	chr1	241.745		itln1	Chr07	28636900
AMEXTC_0340000013876_KCNJ9	chr1	241.745		LOC100489771	scaffold_7147	1541
AMEXTC_0340000059389_LOC104405384	chr1	243.873		ap1g1-like	Chr04	61940876
AMEXTC_0340000158778_ATXN1L	chr1	243.873		atxn1l-like	Chr04	63453722
AMEXTC_0340000196081_IST1	chr1	243.873		ist1	Chr04	63418732
AMEXTC_0340000192857_Phlpp2	chr1	243.873		phlpp2	Chr04	61962689
AMEXTC_0340000171902_ZNF821	chr1	243.873		znf821	Chr04	63429040
AMEXTC_0340000219227_PHLPP2	chr1	243.873		Xetrov90011481m	Chr04	61973418
AMEXTC_0340000069208_hypothetical	chr1	246.001		hnrpk	Chr01	122027702
AMEXTC_0340000050637_HNRNPK	chr1	246.001		hnrpk	Chr01	122027702
AMEXTC_0340000201788_pmfbp1	chr1	246.001		LOC100496014-like	Chr04	63182694
AMEXTC_0340000005760_ZFHX3	chr1	246.001		zfhx3	Chr04	63098852
AMEXTC_0340000296016_ZFHX3	chr1	246.001		zfhx3	Chr04	63098852
AMEXTC_0340000088074_LOC102562298	chr1	246.001		zfhx3	Chr04	63098852
AMEXTC_0340000039643_LOC100495238	chr1	246.001		LOC100495238	scaffold_261	6741
AMEXTC_0340000250470_cdh1.S	chr1	250.352		cdh1	Chr04	63843212
AMEXTC_0340000019117_LOC101945697	chr1	250.352		cdh3	Chr04	63894782
AMEXTC_0340000126432_LOC101942423	chr1	250.352		cdh3	Chr04	63894782
AMEXTC_0340000283973_CHMP1A	chr1	250.352		chmp1a	Chr04	61713690
AMEXTC_0340000061044_UTP4	chr1	250.352		cirh1a	Chr04	63741689
AMEXTC_0340000190016_DEF8	chr1	250.352		def8	Chr04	63689596
AMEXTC_0340000164733_GAS8	chr1	250.352		gas8	Chr04	61830409
AMEXTC_0340000214550_IPO11	chr1	250.352		ipo11	Chr01	175963583
AMEXTC_0340000028773_LOC102363937	chr1	250.352		LOC100489732-like	Chr04	61743844
AMEXTC_0340000050666_LOC103478895	chr1	250.352		LOC101732820	scaffold_1879	6770
AMEXTC_0340000045678_NFAT5	chr1	250.352		nfat5-like	Chr04	62377619
AMEXTC_0340000125111_NIP7	chr1	250.352		nip7	Chr04	62270217
AMEXTC_0340000050186_NOB1	chr1	250.352		nob1	Chr04	62439859
AMEXTC_0340000027745_SNTB2	chr1	250.352		sntb2	Chr04	62184245
AMEXTC_0340000214192_TANGO6	chr1	250.352		tango6	Chr04	63790020
AMEXTC_0340000125112_TMED6	chr1	250.352		tmed6	Chr04	62283887
AMEXTC_0340000036886_WWP2	chr1	250.352		wwp2	Chr04	62451845
AMEXTC_0340000057720_LOC101348352	chr1	259.2		acsf3	Chr04	61084873
AMEXTC_0340000201108_ALKBH3	chr1	259.2		alkbh3-like	Chr04	3217718
AMEXTC_0340000044111_CBFA2T3	chr1	259.2		cbfa2t3	Chr04	60974730
AMEXTC_0340000064650_CDH15	chr1	259.2		cdh15	Chr04	61136008
AMEXTC_0340000156572_SLC22A31	chr1	259.2		slc22a31-like	Chr04	61145578
AMEXTC_0340000044331_LOC109975224	chr1	259.2		Xetrov90024563m	Chr09	79379071
AMEXTC_0340000028314_ANKRD11	chr1	263.619		ankrd11-like	Chr04	61205703
AMEXTC_0340000004345_APRT	chr1	263.619		aprt	Chr04	60896153
AMEXTC_0340000213638_CDT1	chr1	263.619		cdt1	Chr04	60886810
AMEXTC_0340000224795_CTU2	chr1	263.619		ctu2	Chr04	60737862
AMEXTC_0340000163610_PIEZO1	chr1	263.619		piezo1	Chr04	60760869
AMEXTC_0340000026566_SPG7	chr1	263.619		spg7	Chr04	61350316
AMEXTC_0340000190215_ZFPM1	chr1	269.892		zfpm1-like	Chr04	68937895
AMEXTC_0340000051275_ZNF469	chr1	269.892		Xetrov90011600m	Chr04	68882015
AMEXTC_0340000048974_atp2c2.L	chr1	274.598		atp2c2	Chr04	64736626
AMEXTC_0340000225046_CA5A	chr1	274.598		ca5b	Chr04	68234606
AMEXTC_0340000174200_KLHL36	chr1	274.598		cotl1	Chr04	64641469
AMEXTC_0340000035899_crispld2.S	chr1	274.598		crispld2	Chr04	64538316
AMEXTC_0340000010213_JPH3	chr1	274.598		jph3	Chr04	68014340
AMEXTC_0340000186698_USP10	chr1	274.598		usp10	Chr04	64589165
AMEXTC_0340000016272_ZCCHC14	chr1	274.598		zcchc14	Chr04	67915291
AMEXTC_0340000234920_ZDHHC7	chr1	274.598		zdhhc7	Chr04	64394302
AMEXTC_0340000224545_LOC104469002	chr1	276.726		cox4i1	Chr04	67252043
AMEXTC_0340000039639_emc8	chr1	276.726		emc8	Chr04	67258642
AMEXTC_0340000117962_fut2	chr1	276.726		fut1	Chr07	106371237
AMEXTC_0340000248319_GSE1	chr1	276.726		gse1-like	Chr04	67327573
AMEXTC_0340000025242_dusp22a.L	chr1	276.726		LOC100485576-like	Chr04	67197754
AMEXTC_0340000060469_LOC102381265	chr1	289.25		LOC100485959-like.1	Chr07	104577349
AMEXTC_0340000200321_cyth1	chr1	296.912		cyth1-like	Chr07	106697307
AMEXTC_0340000054381_LOC108695911	chr1	296.912		LOC100485164	Chr07	106736133
AMEXTC_0340000174677_mboat7	chr1	301.308		mboat7	Chr07	95806663
AMEXTC_0340000166094_MTHFSD	chr1	301.308		mthfsd	Chr04	66798370
AMEXTC_0340000113209_LOC102946679	chr1	301.308		rps9	Chr07	110153243
AMEXTC_0340000017459_socs3	chr1	301.308		socs3-like.1	Chr07	103921321
AMEXTC_0340000019380_plekha4	chr1	303.436		LOC100170544	Chr07	106537874
AMEXTC_0340000029989_LENG8	chr1	303.436		LOC100488131	scaffold_194	17860
AMEXTC_0340000181346_HSD17B14	chr1	303.436		LOC100498205-like	Chr07	106520856
AMEXTC_0340000043869_LOC108697262	chr1	303.436		mybpc2	Chr07	104378161
AMEXTC_0340000020962_LOC108798327	chr1	304.393		Xetrov90019333m	Chr07	106777086
AMEXTC_0340000170306_ccdc63	chr1	305.542		ccdc63	Chr07	107952987
AMEXTC_0340000240327_KDELR1	chr1	305.542		kdelr2	Chr07	107853847
AMEXTC_0340000156429_LOC108696775	chr1	305.542		tmem143	Chr07	107889029
AMEXTC_0340000226872_tsen34.L	chr1	305.542		tsen34-like	Chr07	106925491
AMEXTC_0340000236587_GRIN2D	chr1	305.542		Xetrov90019344m	Chr07	107572612
AMEXTC_0340000021277_FGF21	chr1	312.254		fgf19	Chr04	4900683
AMEXTC_0340000005235_NFATC1	chr1	312.254		nfatc1	Chr06	28294014
AMEXTC_0340000064326_LOC102382167	chr1	314.414		6330408a02rik-like.2	Chr07	95393254
AMEXTC_0340000135917_ATF5	chr1	314.414		atf5	Chr07	95470407
AMEXTC_0340000063240_LOC105357518	chr1	314.414		LOC101732377	Chr02	132812018
AMEXTC_0340000015743_cd37	chr1	320.893		cd37	Chr07	95852368
AMEXTC_0340000052630_fut2.S	chr1	320.893		fut2	Chr07	103368118
AMEXTC_0340000002822_eps8l1.L	chr1	320.893		LOC100494819-like	Chr07	95911199
AMEXTC_0340000191205_cardiac	chr1	320.893		tnni3	Chr07	96104266
AMEXTC_0340000020914_brsk1	chr1	323.021		brsk2-like	Chr04	12360097
AMEXTC_0340000131615_dnaJ-like	chr1	323.021		dnajc1	Chr06	18691800
AMEXTC_0340000041595_LOC108795149	chr1	323.021		fut1	Chr07	106371237
AMEXTC_0340000260391_HSPBP1	chr1	323.021		hspbp1	Chr07	106179346
AMEXTC_0340000238038_LOC101733761	chr1	323.021		LOC100492742	Chr08	54764578
AMEXTC_0340000024009_ppp6r1	chr1	323.021		ppp6r1-like	Chr07	106192611
AMEXTC_0340000208416_CLHC1	chr1	326.863		clhc1	Chr05	20234228
AMEXTC_0340000077165_mtif2.L	chr1	326.863		mtif2-like	Chr05	20257462
AMEXTC_0340000049484_rps27a	chr1	326.863		Xetrov90013213m	Chr05	20248479
AMEXTC_0340000021506_PNAT10	chr1	337.411		LOC101734214-like	Chr06	134463324
AMEXTC_0340000055111_NAT1	chr1	337.411		Xetrov90021912m	Chr08	100364199
AMEXTC_0340000047405_CDH13	chr1	342		cdh13	Chr04	65535165
AMEXTC_0340000169220_CMIP	chr1	342		cmip-like	Chr04	54950042
AMEXTC_0340000015217_mphosph6.L	chr1	342		mphosph6	Chr04	66339509
AMEXTC_0340000001709_PLCG2	chr1	342		plcg2	Chr04	66508800
AMEXTC_0340000061890_SDR42E1	chr1	342		sdr42e1-like	Chr04	66488137
AMEXTC_0340000051496_LOC108714094	chr1	344.972		LOC100485117	Chr04	67728583
AMEXTC_0340000177506_GPATCH1	chr1	349.323		gpatch1	Chr04	20982131
AMEXTC_0340000048069_LOC107552765	chr1	349.323		LOC100135278	Chr07	94921119
AMEXTC_0340000217017_thap7.S	chr1	349.323		thap7	Chr07	94861977
AMEXTC_0340000004259_ZBTB45	chr1	349.323		zbtb45	Chr07	94767228
AMEXTC_0340000008689_slc7a10	chr1	349.323		Xetrov90010664m	Chr04	20834171
AMEXTC_0340000005925_CHST8	chr1	351.451		chst8	Chr04	19880030
AMEXTC_0340000122094_PEPD	chr1	351.451		pepd	Chr04	20482294
AMEXTC_0340000207697_LOC104912954	chr1	353.579		cyld	Chr04	53729930
AMEXTC_0340000079565_kiaa0355	chr1	353.579		kiaa0355-like	Chr04	19486969
AMEXTC_0340000053128_NKD1	chr1	353.579		nkd1	Chr04	46091226
AMEXTC_0340000002960_NOD2	chr1	353.579		nod1	Chr06	72837948
AMEXTC_0340000223554_Transcription	chr1	353.579		taf4	Chr10	1092665
AMEXTC_0340000054889_CHD9	chr1	360.035		chd9	Chr04	52019466
AMEXTC_0340000027111_CHD9	chr1	360.035		chd9	Chr04	52019466
AMEXTC_0340000007196_LOC109091304	chr1	360.035		chd9	Chr04	52019466
AMEXTC_0340000059540_BBS2	chr1	362.163		bbs2	Chr04	54282510
AMEXTC_0340000182903_DDX28	chr1	362.163		ddx28	Chr04	45892604
AMEXTC_0340000038853_FTO	chr1	362.163		fto	Chr04	44256505
AMEXTC_0340000143343_GNAO1	chr1	362.163		gnao1	Chr04	54374753
AMEXTC_0340000130259_Herpud1	chr1	362.163		herpud1	Chr04	54112410
AMEXTC_0340000000146_irx5	chr1	362.163		irx5	Chr04	44934379
AMEXTC_0340000225765_IRX6	chr1	362.163		irx6	Chr04	45242145
AMEXTC_0340000014838_LOC108696816	chr1	362.163		LOC100491504	Chr07	112532635
AMEXTC_0340000057183_SLC12A4	chr1	362.163		LOC100493471	Chr04	45705683
AMEXTC_0340000158274_C15H16orf70	chr1	362.163		LOC100494115	Chr04	54642687
AMEXTC_0340000154951_ppp2r1a	chr1	362.163		LOC101731355	Chr07	111930208
AMEXTC_0340000018903_kcnn4	chr1	362.163		LOC101732300	Chr07	112855303
AMEXTC_0340000029285_MMP2	chr1	362.163		mmp2	Chr04	45356050
AMEXTC_0340000030453_NFATC3	chr1	362.163		nfatc3	Chr04	44095675
AMEXTC_0340000146842_NUDT21	chr1	362.163		nudt21	Chr04	54207459
AMEXTC_0340000284740_NUP93	chr1	362.163		nup93	Chr04	46263049
AMEXTC_0340000280189_OGFOD1	chr1	362.163		ogfod1	Chr04	54217951
AMEXTC_0340000238727_RPGRIP1L	chr1	362.163		rpgrip1l	Chr04	44179853
AMEXTC_0340000055597_TRADD	chr1	362.163		tradd	Chr04	54685272
AMEXTC_0340000214417_LOC110313547	chr1	362.163		znf250	scaffold_208	306580
AMEXTC_0340000031219_LOC108714028	chr1	362.163		Xetrov90011380m	Chr04	54758791
AMEXTC_0340000164360_LOC110089618	chr1	370.98		LOC100488052	Chr07	112947493
AMEXTC_0340000067123_ETHE1	chr1	380.094		ethe1	Chr07	110936307
AMEXTC_0340000237307_LOC101935434	chr1	380.094		gbp6	Chr07	109023496
AMEXTC_0340000059226_LOC102947794	chr1	380.094		LOC100489124	Chr07	111019124
AMEXTC_0340000171826_LOC110090689	chr1	380.094		LOC100490614	Chr07	110706113
AMEXTC_0340000158963_LOC101950676	chr1	380.094		LOC100491165-like	Chr08	98050927
AMEXTC_0340000019271_LOC106674670	chr1	380.094		LOC100494026	scaffold_289	104055
AMEXTC_0340000083581_LOC100494026	chr1	380.094		LOC100494026	scaffold_289	104055
AMEXTC_0340000158961_LOC100027742	chr1	380.094		LOC101732226-like	Chr02	66691946
AMEXTC_0340000158961_LOC100027742	chr1	380.094		LOC101733761	scaffold_2371	3589
AMEXTC_0340000214182_phldb3.S	chr1	380.094		phldb3-like	Chr07	110982114
AMEXTC_0340000158961_LOC100027742	chr1	380.094		znf628	Chr07	95523968
AMEXTC_0340000237307_LOC101935434	chr1	380.094		Xetrov90019373m	Chr07	108962123
AMEXTC_0340000247593_LOC108785514	chr1	380.094		Xetrov90019425m	Chr07	110918758
AMEXTC_0340000207951_PMEPA1	chr1	382.222		pmepa1	Chr10	114450
AMEXTC_0340000044914_grik5	chr1	384.35		grik5-like.2	Chr07	98709018
AMEXTC_0340000039245_LOC106550989	chr1	384.35		LOC101730884	Chr07	98596855
AMEXTC_0340000293295_ERF	chr1	386.652		erf	Chr07	99060020
AMEXTC_0340000055718_LOC102349733	chr1	386.652		znf526	Chr07	99014188
AMEXTC_0340000193902_lipe	chr1	412.572		lipe	Chr07	99514031
AMEXTC_0340000200855_LOC102459912	chr1	412.572		LOC100487919	Chr07	100595871
AMEXTC_0340000236512_MEGF8	chr1	412.572		megf8	Chr07	99351650
AMEXTC_0340000180085_CBLC	chr1	414.7		cbl	Chr07	85895581
AMEXTC_0340000180085_CBLC	chr1	414.7		cblb	Chr02	99499336
AMEXTC_0340000207235_atp12a-like	chr1	419.062		atp12a-like.1	Chr05	19690899
AMEXTC_0340000011763_LOC107982642	chr1	419.062		phactr1	Chr06	85722977
AMEXTC_0340000051098_ALDH9A1	chr1	421.201		aldh9a1	Chr04	108880000
AMEXTC_0340000284718_BCAM	chr1	421.201		bcam	Chr07	101234939
AMEXTC_0340000063146_xcxcra	chr1	421.201		cxcr3	Chr07	101712520
AMEXTC_0340000225319_LOC102367138	chr1	421.201		ddx6	Chr07	85387749
AMEXTC_0340000181016_lrrc52	chr1	421.201		lrrc52	Chr04	108836082
AMEXTC_0340000076399_TRMT1L	chr1	421.201		trmt1l-like	Chr04	103815051
AMEXTC_0340000023686_EDEM3	chr1	423.329		edem3-like	Chr04	103857337
AMEXTC_0340000052553_FAM129A	chr1	423.329		fam129b	Chr08	12056448
AMEXTC_0340000064994_LOC108715754	chr1	423.329		LOC100497256-like	Chr04	108818533
AMEXTC_0340000178695_COLGALT2	chr1	423.329		LOC101734319	Chr04	109606044
AMEXTC_0340000051803_RNF2	chr1	423.329		rnf2	Chr04	103844739
AMEXTC_0340000008885_FAM78B	chr1	425.457		fam78b	Chr04	109007873
AMEXTC_0340000043014_fmo5.S	chr1	425.457		fmo5	Chr04	109116782
AMEXTC_0340000113273_LOC106737209	chr1	425.457		fmo5	Chr04	109116782
AMEXTC_0340000206411_DARS2	chr1	427.585		dars2-like	Chr04	87626035
AMEXTC_0340000060858_LOC101937948	chr1	427.585		hebp2	Chr05	23839843
AMEXTC_0340000049684_RABGAP1L	chr1	427.585		rabgap1l	Chr04	87647072
AMEXTC_0340000001288_RC3H1	chr1	427.585		rc3h1-like	Chr04	87870342
AMEXTC_0340000085584_LOC108786287	chr1	427.585		tnn	Chr04	88015342
AMEXTC_0340000202345_ZBTB37	chr1	427.585		zbtb37	Chr04	87932869
AMEXTC_0340000043486_TNR	chr1	429.713		tnr	Chr04	88161606
AMEXTC_0340000025923_ASTN1	chr1	434.063		astn1	Chr04	88638524
AMEXTC_0340000029521_PAPPA2	chr1	434.063		pappa2	Chr04	88560621
AMEXTC_0340000213136_ANKRD45	chr1	436.191		ankrd45-like	Chr04	96828427
AMEXTC_0340000139872_fam20b	chr1	436.191		fam20b	Chr04	89644319
AMEXTC_0340000139873_FAM20B	chr1	436.191		fam20b	Chr04	89644319
AMEXTC_0340000005148_KLHL20	chr1	436.191		klhl20	Chr04	96793640
AMEXTC_0340000044726_LOC110073471	chr1	436.191		phactr1	Chr06	85722977
AMEXTC_0340000030219_RALGPS2	chr1	436.191		ralgps2-like	Chr04	89548701
AMEXTC_0340000214584_rasal2	chr1	436.191		rasal2-like.2	Chr04	89382661
AMEXTC_0340000208105_transcriptional	chr1	436.191		tada1	Chr04	96857867
AMEXTC_0340000050122_ARHGAP29	chr1	438.319		arhgap29	Chr04	93441257
AMEXTC_0340000059441_tissue	chr1	438.319		f3	Chr04	93311227
AMEXTC_0340000050247_LOC108790013	chr1	438.319		nr5a2	Chr04	101700121
AMEXTC_0340000040051_KIF14	chr1	438.319		Xetrov90012200m	Chr04	101828845
AMEXTC_0340000179400_DDX59	chr1	438.319		Xetrov90012201m	Chr04	101862376
AMEXTC_0340000014765_CAMSAP2	chr1	438.319		Xetrov90012204m	Chr04	101936590
AMEXTC_0340000147461_ITPA	chr1	440.447		itpa-like	Chr04	97445214
AMEXTC_0340000060687_tmem56.S	chr1	440.447		LOC100489043	Chr04	91552986
AMEXTC_0340000003460_MYOC	chr1	440.447		myoc	Chr04	97499454
AMEXTC_0340000019702_nuf2.L	chr1	440.447		nuf2	Chr04	98028874
AMEXTC_0340000027585_PTPRC	chr1	440.447		ptprc	Chr04	101354171
AMEXTC_0340000171666_DUSP12	chr1	442.554		dusp12	Chr05	23874009
AMEXTC_0340000025293_OLFML2B	chr1	442.554		olfml2b-like	Chr04	108525133
AMEXTC_0340000040461_KIFAP3	chr1	444.703		kifap3	Chr04	108205774
AMEXTC_0340000181277_LOC101942176	chr1	444.703		pde4dip	Chr04	107831560
AMEXTC_0340000014787_PRKAB2	chr1	444.703		prkab2	Chr04	107763504
AMEXTC_0340000021189_prrx1	chr1	444.703		prrx1	Chr04	107911194
AMEXTC_0340000238518_SCYL3	chr1	444.703		scyl3	Chr04	108279401
AMEXTC_0340000210310_SEC22B	chr1	444.703		sec22b	Chr04	107751288
AMEXTC_0340000175653_HMCN1	chr1	462.182		hmcn1	Chr04	109465800
AMEXTC_0340000223426_HMCN1	chr1	462.182		hmcn1	Chr04	109465800
AMEXTC_0340000134508_HMCN1	chr1	462.182		hmcn1	Chr04	109465800
AMEXTC_0340000132938_HMCN1	chr1	462.182		hmcn1	Chr04	109465800
AMEXTC_0340000148924_HMCN1	chr1	462.182		hmcn1	Chr04	109465800
AMEXTC_0340000024053_B3GALT2	chr1	462.182		LOC100487440	Chr04	103640271
AMEXTC_0340000250174_TPR	chr1	462.182		LOC101731806	Chr04	109365588
AMEXTC_0340000026641_rgs13	chr1	462.182		rgs13	Chr04	107245740
AMEXTC_0340000010767_rgs2.L	chr1	462.182		rgs2	Chr04	107346512
AMEXTC_0340000284702_influenza	chr1	462.182		Xetrov90012236m	Chr04	103687658
AMEXTC_0340000013066_PTGS2	chr1	463.373		ptgs2	Chr04	109238816
AMEXTC_0340000227932_hypothetical	chr1	463.373		Xetrov90015615m	Chr06	11744811
AMEXTC_0340000267522_LAMC1	chr1	464.288		lamc1	Chr04	89864311
AMEXTC_0340000054310_NCF2	chr1	464.288		ncf2	Chr04	89742909
AMEXTC_0340000047122_pla2g4a	chr1	464.288		pla2g4a	Chr04	109155631
AMEXTC_0340000013888_SMG7	chr1	464.288		smg7	Chr04	89764295
AMEXTC_0340000259528_DHX9	chr1	465.319		dhx9	Chr04	89969812
AMEXTC_0340000205712_glul	chr1	465.319		glul-like.1	Chr04	90095344
AMEXTC_0340000195008_znf91	chr1	465.319		LOC100488674	Chr04	90175118
AMEXTC_0340000028766_RGS8	chr1	465.319		rgs8	Chr04	90048764
AMEXTC_0340000007995_hypothetical	chr1	466.393		cacna1a-like	Chr03	129506774
AMEXTC_0340000227232_ACBD6	chr1	470.744		acbd6	Chr04	90825827
AMEXTC_0340000064113_LOC104386128	chr1	470.744		adamtsl2	scaffold_353	36871
AMEXTC_0340000030228_LOC102449075	chr1	470.744		f13b-like	Chr08	113638067
AMEXTC_0340000256815_soat1.S	chr1	470.744		soat1	Chr04	91256047
AMEXTC_0340000045501_XPR1	chr1	470.744		xpr1	Chr04	90717329
AMEXTC_0340000198671_DENND1B	chr1	479.548		dennd1c	Chr03	130164332
AMEXTC_0340000019446_LIM/homeobox	chr1	479.548		lhx9	Chr04	101172999
AMEXTC_0340000058525_ZBTB41	chr1	479.548		zbtb41	Chr04	100925665
AMEXTC_0340000029400_ASPM	chr1	479.548		Xetrov90012190m	Chr04	100887853
AMEXTC_0340000252657_RWDD3	chr1	483.899		rwdd3	Chr04	91597004
AMEXTC_0340000057715_dpyd	chr1	483.899		Xetrov90012036m	Chr04	92206371
AMEXTC_0340000057715_dpyd	chr1	483.899		Xetrov90012037m	Chr04	92348072
AMEXTC_0340000006992_PALMD	chr1	486.027		LOC100498317	Chr04	91325158
AMEXTC_0340000238677_AGL	chr1	488.155		agl	Chr04	98454974
AMEXTC_0340000051589_COL11A1	chr1	490.283		col5a3-like	Chr04	99438676
AMEXTC_0340000136967_DBT	chr1	490.283		dbt	Chr04	98799493
AMEXTC_0340000041363_DNASE2B	chr1	490.283		dnase2b	Chr04	29731810
AMEXTC_0340000221450_DPH5	chr1	490.283		dph5	Chr04	98980898
AMEXTC_0340000158043_ADGRL2	chr1	490.283		lphn2	Chr04	30728264
AMEXTC_0340000052186_LOC101482575	chr1	490.283		prkacb	Chr04	29797286
AMEXTC_0340000248993_RTCA	chr1	490.283		rtca	Chr04	98809730
AMEXTC_0340000037783_S1PR1	chr1	490.283		s1pr5	Chr03	127323105
AMEXTC_0340000209020_SASS6	chr1	490.283		sass6.2	Chr04	98751351
AMEXTC_0340000035317_slc30a7.L	chr1	490.283		slc30a7	Chr04	98954045
AMEXTC_0340000082578_SLC35A3	chr1	490.283		slc35a3.2	Chr07	115901016
AMEXTC_0340000131899_TRMT13	chr1	490.283		trmt13	Chr04	98768705
AMEXTC_0340000036854_Fubp1	chr1	492.411		fubp1	Chr04	69963487
AMEXTC_0340000001729_NEXN	chr1	492.411		nexn-like	Chr04	69993371
AMEXTC_0340000042659_LOC100564731	chr1	496.667		col24a1	Chr04	28777428
AMEXTC_0340000257024_cysteine-rich	chr1	496.667		cyr61	Chr04	29037957
AMEXTC_0340000185927_bcl10	chr1	507.714		bcl10	Chr04	29177267
AMEXTC_0340000158657_CEP83	chr1	507.714		cep83	Chr03	47034318
AMEXTC_0340000132468_ctbs.L	chr1	507.714		ctbs	Chr04	29641714
AMEXTC_0340000067987_vitellogenin	chr1	507.714		LOC100485054	Chr04	29562699
AMEXTC_0340000227567_SYDE2	chr1	507.714		syde2-like	Chr04	29263096
AMEXTC_0340000179166_tmcc3	chr1	507.714		tmcc3	Chr03	47057162
AMEXTC_0340000027634_BCAR3	chr1	509.842		bcar3	Chr04	93805755
AMEXTC_0340000010147_CCDC18	chr1	509.842		ccdc18-like	Chr04	94001941
AMEXTC_0340000228367_CDC7	chr1	509.842		cdc7	Chr04	94753513
AMEXTC_0340000131926_FNBP1L	chr1	509.842		fnbp1l	Chr04	93892717
AMEXTC_0340000263262_LOC101936064	chr1	509.842		LOC100124812	Chr04	93990271
AMEXTC_0340000031204_LOC102935576	chr1	509.842		LOC100492589	Chr04	102134516
AMEXTC_0340000042256_lrrc8b	chr1	509.842		lrrc8b	Chr04	95574611
AMEXTC_0340000157496_LRRC8C	chr1	509.842		lrrc8c	Chr04	95532979
AMEXTC_0340000026499_LRRC8D	chr1	509.842		lrrc8d	Chr04	95473730
AMEXTC_0340000178005_prpf38b	chr1	509.842		prpf38b	Chr04	102239468
AMEXTC_0340000139919_RPL5	chr1	509.842		rpl5	Chr04	94169434
AMEXTC_0340000001210_SLC25A24	chr1	509.842		slc25a24	Chr04	100831214
AMEXTC_0340000211086_STXBP3	chr1	509.842		stxbp3	Chr04	102094180
AMEXTC_0340000142932_transmembrane	chr1	509.842		tmed5	Chr04	94045272
AMEXTC_0340000050546_Zfp326	chr1	509.842		znf326	Chr04	95442711
AMEXTC_0340000075792_VAV3	chr1	509.842		Xetrov90012188m	Chr04	100698616
AMEXTC_0340000047831_Guanine	chr1	509.842		Xetrov90012188m	Chr04	100698616
AMEXTC_0340000291944_WDR47	chr1	509.842		Xetrov90012202m	Chr04	101872422
AMEXTC_0340000003574_CLCC1	chr1	509.842		Xetrov90012205m	Chr04	102002185
AMEXTC_0340000044618_GPSM2	chr1	509.842		Xetrov90012209m	Chr04	102030167
AMEXTC_0340000041054_LOC102685057	chr1	509.842		Xetrov90012215m	Chr04	102210043
AMEXTC_0340000083493_LINE-1	chr1	509.842		Xetrov90014539m	Chr05	106413885
AMEXTC_0340000180238_CRYZ	chr1	525.659		cryz	Chr04	71089150
AMEXTC_0340000291935_LRRC40	chr1	525.659		lrrc40	Chr04	80786527
AMEXTC_0340000061458_lrriq3	chr1	525.659		lrriq3	Chr04	71312132
AMEXTC_0340000024746_RABGGTB	chr1	525.659		rabggtb	Chr04	70804062
AMEXTC_0340000259166_RNPC3	chr1	525.659		rnpc3-like.1	Chr04	99708333
AMEXTC_0340000181937_srsf11	chr1	525.659		srsf11-like	Chr04	80810936
AMEXTC_0340000158853_DEPDC1	chr1	527.787		depdc1	Chr04	80370323
AMEXTC_0340000218324_LOC102929332	chr1	527.787		LOC100497391	Chr04	80333838
AMEXTC_0340000034351_slc35d1.L	chr1	527.787		LOC100497699-like	Chr04	79867824
AMEXTC_0340000035115_PDE4B	chr1	527.787		pde4b	Chr04	79616143
AMEXTC_0340000195863_serbp1	chr1	527.787		serbp1	Chr04	80021413
AMEXTC_0340000237866_SGIP1	chr1	527.787		sgip1	Chr04	79670205
AMEXTC_0340000001132_JAK1	chr1	546.219		jak1	Chr04	79033227
AMEXTC_0340000024552_ROR1	chr1	546.219		ror1	Chr04	78792318
AMEXTC_0340000045489_CACHD1	chr1	546.219		Xetrov90011781m	Chr04	78955785
AMEXTC_0340000174890_LOC104168799	chr1	548.347		alg6	Chr04	78434093
AMEXTC_0340000165985_LOC102352693	chr1	548.347		frem1	Chr04	77277148
AMEXTC_0340000027260_PATJ	chr1	548.347		inadl	Chr04	77865269
AMEXTC_0340000034579_KANK4	chr1	548.347		kank4	Chr04	77997908
AMEXTC_0340000053991_LOC104912428	chr1	548.347		LOC100486127-like	Chr01	116814354
AMEXTC_0340000046080_ANGPTL3	chr1	548.347		LOC496885	Chr04	78132638
AMEXTC_0340000301253_psma4	chr1	548.347		psma4	Chr04	77243702
AMEXTC_0340000148600_TM2D1	chr1	548.347		tm2d1	Chr04	77841438
AMEXTC_0340000186044_USP1	chr1	548.347		usp1	Chr04	28432236
AMEXTC_0340000199376_ACOT11	chr1	550.475		acot11-like	Chr04	87471353
AMEXTC_0340000025943_dhcr24	chr1	550.475		dhcr24	Chr04	87560465
AMEXTC_0340000228415_lexm	chr1	550.475		LOC100491026	Chr04	87550430
AMEXTC_0340000172748_MYSM1	chr1	550.475		mysm1	Chr04	76796649
AMEXTC_0340000177244_Oma1	chr1	550.475		oma1-like	Chr04	76748617
AMEXTC_0340000039550_PRKAA2	chr1	550.475		prkaa2	Chr04	76032743
AMEXTC_0340000059150_TTC22	chr1	550.475		ttc22	Chr04	87529624
AMEXTC_0340000178867_Ttc4	chr1	550.475		ttc4-like	Chr04	87511946
AMEXTC_0340000028176_USP24	chr1	550.475		usp24	Chr04	75359613
AMEXTC_0340000159336_cpt2	chr1	551.242		cpt2	Chr04	86990194
AMEXTC_0340000055099_acsbg2	chr1	552.582		acsbg2	Chr01	82950824
AMEXTC_0340000260607_LOC102944079	chr1	552.582		coa7	Chr04	86846243
AMEXTC_0340000028159_DMRTA2	chr1	552.582		dmrta2	Chr04	85796602
AMEXTC_0340000300860_echdc2	chr1	552.582		echdc2	Chr04	86875102
AMEXTC_0340000214741_TAF1C	chr1	552.582		LOC100496040-like	scaffold_1581	7756
AMEXTC_0340000208823_NRDC	chr1	552.582		LOC101730862	Chr04	86302611
AMEXTC_0340000045468_TTC39A	chr1	552.582		ttc39a	Chr04	86079771
AMEXTC_0340000065878_yipf1	chr1	552.582		yipf1	Chr04	87243607
AMEXTC_0340000061853_LOC110402521	chr1	552.582		zyg11b	Chr04	86857120
AMEXTC_0340000156012_BEND5	chr1	556.838		bend5-like	Chr04	84938206
AMEXTC_0340000037835_slc5a9	chr1	563.515		slc5a9	Chr04	84577798
AMEXTC_0340000015758_cmpk1	chr1	567.86		cmpk1-like	Chr04	83817764
AMEXTC_0340000168350_cytochrome	chr1	567.86		cyp4b1	Chr04	83619357
AMEXTC_0340000232968_LOC101952194	chr1	569.988		cyp4b1	Chr04	83619357
AMEXTC_0340000045456_cytochrome	chr1	569.988		cyp4b1.2	Chr04	83637242
AMEXTC_0340000232968_LOC101952194	chr1	569.988		cyp4b1.2	Chr04	83637242
AMEXTC_0340000035359_cytochrome	chr1	569.988		cyp4b1.2	Chr04	83637242
AMEXTC_0340000016306_EFCAB14	chr1	569.988		efcab14-like	Chr04	83586285
AMEXTC_0340000035359_cytochrome	chr1	569.988		LOC100487918	Chr04	83653674
AMEXTC_0340000014886_MOB3C	chr1	569.988		mob3c	Chr04	83517735
AMEXTC_0340000064728_MKNK1	chr1	572.116		Xetrov90011857m	Chr04	83477567
AMEXTC_0340000141013_faah.1	chr1	574.244		LOC100487591	Chr04	81035890
AMEXTC_0340000036492_LOC101934307	chr1	574.244		LOC100487591	Chr04	81035890
AMEXTC_0340000182076_lrrc41.S	chr1	574.244		lrrc41	Chr04	81114219
AMEXTC_0340000010571_PIK3R3	chr1	580.909		pik3r3	Chr04	81893324
AMEXTC_0340000046757_MAST2	chr1	583.014		mast2	Chr04	81977484
AMEXTC_0340000156506_SLC6A9	chr1	587.27		slc6a9	Chr04	82375599
AMEXTC_0340000132334_DMAP1	chr1	589.398		dmap1	Chr04	82690214
AMEXTC_0340000131937_eri3	chr1	589.398		eri3	Chr04	82739387
AMEXTC_0340000266513_PLK3	chr1	589.398		plk3	Chr04	72751058
AMEXTC_0340000157262_RNF220	chr1	589.398		rnf220.1	Chr04	83101287
AMEXTC_0340000268472_EIF2B3	chr1	591.526		eif2b3	Chr04	72929627
AMEXTC_0340000182500_LOC110402634	chr1	591.526		hectd3	Chr04	73169917
AMEXTC_0340000025902_ptch2	chr1	591.526		ptch2	Chr04	72869606
AMEXTC_0340000246449_AKR1A1	chr1	593.654		akr1a1	Chr04	73311868
AMEXTC_0340000047892_IPP	chr1	593.654		ipp	Chr04	73453673
AMEXTC_0340000156191_MMACHC	chr1	593.654		LOC100492755-like	Chr04	73231594
AMEXTC_0340000202723_mutyh	chr1	593.654		mutyh	Chr04	73054781
AMEXTC_0340000060289_NASP	chr1	593.654		nasp	Chr04	73341342
AMEXTC_0340000156893_ST3GAL3	chr1	593.654		st3gal3-like	Chr04	73805107
AMEXTC_0340000053823_TESK2	chr1	593.654		tesk2	Chr04	72981415
AMEXTC_0340000269267_cdc20	chr1	595.782		cdc20	Chr04	75127922
AMEXTC_0340000114416_elovl1.L	chr1	595.782		elovl1	Chr04	75102191
AMEXTC_0340000209234_PTPRF	chr1	595.782		ptprf	Chr04	73999262
AMEXTC_0340000244085_SZT2	chr1	595.782		szt2	Chr04	75065369
AMEXTC_0340000203709_LOC104552082	chr1	597.91		glipr1l1	Chr03	51640394
AMEXTC_0340000050923_LOC103281476	chr1	597.91		LOC100486661	scaffold_499	13865
AMEXTC_0340000050923_LOC103281476	chr1	597.91		LOC100486661	scaffold_499	13865
AMEXTC_0340000061079_LOC107539397	chr1	597.91		LOC101734394	scaffold_53	401012
AMEXTC_0340000216858_LOC107151831	chr2	2.128		LOC100491165-like	Chr08	98050927
AMEXTC_0340000183559_ZNF282	chr2	2.128		LOC100491165-like	Chr08	98050927
AMEXTC_0340000267527_GLT8D1	chr2	6.479		glt8d2	Chr03	40335030
AMEXTC_0340000182042_NISCH	chr2	6.479		nisch	scaffold_6795	231
AMEXTC_0340000003032_STAB1	chr2	6.479		stab2	Chr03	39887253
AMEXTC_0340000034187_STAB1	chr2	6.479		stab2	Chr03	39887253
AMEXTC_0340000062033_STAB1	chr2	6.479		stab2	Chr03	39887253
AMEXTC_0340000045148_ALAS1	chr2	8.607		alas1	Chr04	118428977
AMEXTC_0340000301943_CCDC51	chr2	8.607		ccdc51	Chr04	128899350
AMEXTC_0340000028963_LHFPL4	chr2	8.607		lhfpl4	Chr04	128447356
AMEXTC_0340000159284_LOC100144966	chr2	8.607		LOC100144966	Chr04	128632629
AMEXTC_0340000293917_LOC102936992	chr2	8.607		LOC100487019	Chr04	118451837
AMEXTC_0340000064950_LOC108788226	chr2	8.607		LOC100497175-like	Chr04	128931432
AMEXTC_0340000017349_PDZRN3	chr2	8.607		pdzrn3-like.1	Chr04	129141546
AMEXTC_0340000016006_PLXNB1	chr2	8.607		plxnb1	Chr04	128680193
AMEXTC_0340000279807_poc1a	chr2	8.607		poc1b	Chr03	45574243
AMEXTC_0340000154548_BRPF1	chr2	12.862		brpf1	Chr04	127842101
AMEXTC_0340000063924_CIDEC	chr2	12.862		cidec	Chr04	127693934
AMEXTC_0340000053455_JAGN1	chr2	12.862		jagn1	Chr04	127702283
AMEXTC_0340000135699_LOC108804375	chr2	12.862		LOC100485259	Chr04	127441889
AMEXTC_0340000187296_IL17RC	chr2	12.862		LOC100486154	Chr04	127780591
AMEXTC_0340000118507_ogg1	chr2	12.862		ogg1-like	Chr04	127876318
AMEXTC_0340000228533_LOC108714692	chr2	12.862		prrt3-like	Chr04	127543202
AMEXTC_0340000065635_ARIH2	chr2	14.99		arih2	Chr04	126101238
AMEXTC_0340000057997_DALRD3	chr2	14.99		dalrd3	Chr04	126207510
AMEXTC_0340000049297_LOC101931205	chr2	14.99		frzb2	Chr04	126082108
AMEXTC_0340000269349_impdh2	chr2	14.99		impdh2	Chr04	126277485
AMEXTC_0340000004428_lamb2	chr2	14.99		lamb2-like	Chr04	127005972
AMEXTC_0340000031192_LOC108714679	chr2	14.99		LOC100488772	Chr04	126684690
AMEXTC_0340000221063_LOC108715886	chr2	14.99		pim1	Chr04	126438343
AMEXTC_0340000221023_QRICH1	chr2	14.99		qrich1.1	Chr04	126300073
AMEXTC_0340000012797_slc6a8	chr2	14.99		slc6a8	Chr04	126879084
AMEXTC_0340000231786_USP19	chr2	14.99		usp19	Chr04	126943805
AMEXTC_0340000018381_IP6K2	chr2	19.341		ip6k2	Chr04	125822745
AMEXTC_0340000107377_HMCES	chr2	23.692		hmces	Chr04	125187292
AMEXTC_0340000234468_NCKIPSD	chr2	23.692		nckipsd	Chr04	125631619
AMEXTC_0340000260423_RAB7A	chr2	23.692		rab7a	Chr04	125117320
AMEXTC_0340000049601_CELSR3	chr2	23.692		slc26a6-like.2	Chr04	125470841
AMEXTC_0340000022484_COL7A1	chr2	23.692		Xetrov90012754m	Chr04	125254875
AMEXTC_0340000240195_EEFSEC	chr2	25.82		eefsec	Chr04	124531006
AMEXTC_0340000052417_GATA2	chr2	25.82		gata2	Chr04	124937942
AMEXTC_0340000018336_LOC108714668	chr2	25.82		LOC101732902	scaffold_6975	2070
AMEXTC_0340000222668_MCM2	chr2	25.82		mcm2	Chr04	124282463
AMEXTC_0340000001191_MGLL	chr2	25.82		mgll	Chr04	124360506
AMEXTC_0340000152551_NCKAP1	chr2	25.82		nckap1-like	Chr09	56884073
AMEXTC_0340000051033_rpn1	chr2	25.82		rpn1	Chr04	125087462
AMEXTC_0340000250129_SEC61A1	chr2	25.82		sec61a1	Chr04	124478016
AMEXTC_0340000248436_TPRA1	chr2	25.82		tpra1	Chr04	124250714
AMEXTC_0340000227884_plxna1	chr2	27.948		Xetrov90012724m	Chr04	123649722
AMEXTC_0340000042578_aldh1l1.L	chr2	36.542		aldh1l1	Chr04	122788241
AMEXTC_0340000021353_cfap100	chr2	36.542		ccdc37	Chr04	122572617
AMEXTC_0340000079429_LOC100032537	chr2	36.542		chchd4	Chr04	122502293
AMEXTC_0340000039259_CHST13	chr2	36.542		chst13	Chr04	122875443
AMEXTC_0340000054949_Solute	chr2	36.542		slc41a3	Chr04	122842264
AMEXTC_0340000046116_TMEM43	chr2	36.542		tmem43-like	Chr04	122489246
AMEXTC_0340000294843_txnrd3	chr2	36.542		txnrd3	Chr04	122921580
AMEXTC_0340000269295_UROC1	chr2	36.542		uroc1	Chr04	122529691
AMEXTC_0340000220994_ZXDC	chr2	36.542		zxdc	Chr04	122558662
AMEXTC_0340000192586_GRIP2	chr2	38.67		grip2	Chr04	122293021
AMEXTC_0340000214680_PLXND1	chr2	38.67		plxnd1	Chr04	121538289
AMEXTC_0340000042360_hypothetical	chr2	38.67		rho	Chr04	121524129
AMEXTC_0340000251051_sec13	chr2	38.67		sec13	Chr04	121402493
AMEXTC_0340000008818_SRGAP3	chr2	47.52		srgap3	Chr04	121237027
AMEXTC_0340000171823_LOC102931631	chr2	78.28		bod1	scaffold_448	278
AMEXTC_0340000201535_CRBN	chr2	78.28		crbn	Chr04	119446757
AMEXTC_0340000187194_FAM120A	chr2	78.28		fam120a	scaffold_350	69567
AMEXTC_0340000025141_WNT7A	chr2	78.28		LOC100490426	Chr08	3029078
AMEXTC_0340000016868_LRRN1	chr2	78.28		lrrn1-like.1	Chr04	119516322
AMEXTC_0340000029275_CHL1	chr2	78.28		nrcam	Chr03	55834742
AMEXTC_0340000185502_PFKFB4	chr2	78.28		pfkfb4	Chr04	113380618
AMEXTC_0340000046628_PHF2	chr2	78.28		phf8	Chr08	8505281
AMEXTC_0340000062211_PRKCD	chr2	78.28		prkcd	Chr04	113363332
AMEXTC_0340000062211_PRKCD	chr2	78.28		prkcq	Chr03	74606063
AMEXTC_0340000193073_rft1	chr2	78.28		rft1	Chr04	113273473
AMEXTC_0340000261156_LOC110195620	chr2	78.28		setmar	Chr04	119540668
AMEXTC_0340000053381_SFMBT1	chr2	78.28		sfmbt2	Chr03	74345990
AMEXTC_0340000023945_WNK2	chr2	78.28		wnk2	scaffold_350	15236
AMEXTC_0340000019567_ITIH4	chr2	78.28		Xetrov90012634m	Chr04	118201985
AMEXTC_0340000010402_LOC101947815	chr2	78.28		Xetrov90012634m	Chr04	118201985
AMEXTC_0340000060420_LOC107197025	chr2	78.28		Xetrov90024563m	Chr09	79379071
AMEXTC_0340000025379_PHF2	chr2	78.28		Xetrov90029279m	scaffold_515	35943
AMEXTC_0340000180230_ACTR8	chr2	80.408		actr8	scaffold_7683	206
AMEXTC_0340000048285_BICD2	chr2	80.408		bicd2	scaffold_192	260588
AMEXTC_0340000013813_ARHGEF3	chr2	82.514		arhgef3-like	scaffold_49	79382
AMEXTC_0340000053122_CCDC66	chr2	82.514		ccdc66-like	scaffold_49	198869
AMEXTC_0340000221828_FAM208A	chr2	82.514		fam208a-like	scaffold_49	129830
AMEXTC_0340000226053_hypothetical	chr2	82.514		wnt5a	scaffold_88	5295
AMEXTC_0340000189489_ADAMTS9	chr2	84.642		adamts9	Chr04	132113275
AMEXTC_0340000213170_arf4.S	chr2	84.642		arf4	scaffold_92	329374
AMEXTC_0340000181334_cntd2	chr2	84.642		cntd2	Chr08	56498099
AMEXTC_0340000047736_DENND6A	chr2	84.642		dennd6b	Chr03	79570948
AMEXTC_0340000026220_prickle2.S	chr2	84.642		prickle2	Chr04	132406108
AMEXTC_0340000213610_SLMAP	chr2	84.642		slmap	scaffold_87	607398
AMEXTC_0340000013144_MAGI1	chr2	84.642		Xetrov90026635m	scaffold_16	1558239
AMEXTC_0340000012223_CADPS	chr2	86.77		cadps	Chr04	133050494
AMEXTC_0340000215979_ACOX2	chr2	91.026		acox2	Chr04	128082421
AMEXTC_0340000067213_FAM3D	chr2	91.026		fam3d	scaffold_14	146778
AMEXTC_0340000116433_KCTD6	chr2	91.026		kctd6	scaffold_87	281642
AMEXTC_0340000200361_pdhb	chr2	91.026		pdhb	scaffold_87	292612
AMEXTC_0340000229483_ABHD6	chr2	93.154		abhd6	scaffold_87	401904
AMEXTC_0340000034560_FLNB	chr2	93.154		flnb	scaffold_87	435627
AMEXTC_0340000228179_LRIG1	chr2	93.154		lrig1	scaffold_16	1085191
AMEXTC_0340000006483_PXK	chr2	93.154		pxk	scaffold_87	303710
AMEXTC_0340000250940_hypothetical	chr2	93.154		rpp14	scaffold_87	354665
AMEXTC_0340000046345_KBTBD8	chr2	95.282		kbtbd8	scaffold_16	903489
AMEXTC_0340000121599_LOC101950129	chr2	95.282		LOC100491288	scaffold_16	859583
AMEXTC_0340000154988_TMF1	chr2	99.538		eogt	Chr04	131516355
AMEXTC_0340000022420_FOXP1	chr2	99.538		foxp1	Chr04	130190634
AMEXTC_0340000237301_FRMD4B	chr2	99.538		frmd4b-like	Chr04	131223615
AMEXTC_0340000039845_LOC108714721	chr2	99.538		lmod3	Chr04	131342974
AMEXTC_0340000021862_MITF	chr2	99.538		mitf	Chr04	130984521
AMEXTC_0340000064989_LOC103176720	chr2	101.666		cdk17	Chr03	40986997
AMEXTC_0340000165602_IPPK	chr2	101.666		ippk	Chr04	113574422
AMEXTC_0340000020454_ECM2	chr2	101.666		Xetrov90012503m	Chr04	113630267
AMEXTC_0340000042648_aspn.L	chr2	103.794		aspn	Chr04	113664212
AMEXTC_0340000020405_LOC104638150	chr2	103.794		atp2b4-like	Chr02	61830181
AMEXTC_0340000163743_NOL8	chr2	103.794		LOC100135171	Chr04	113743277
AMEXTC_0340000029770_SLC6A11	chr2	103.794		LOC100492029	scaffold_135	176410
AMEXTC_0340000042107_SLC6A1	chr2	103.794		slc6a1	scaffold_135	214693
AMEXTC_0340000029770_SLC6A11	chr2	103.794		slc6a13	scaffold_135	132351
AMEXTC_0340000011941_OMD	chr2	103.794		Xetrov90012505m	Chr04	113694781
AMEXTC_0340000158936_LOC101936505	chr2	108.144		cecr5	scaffold_41	521397
AMEXTC_0340000024267_EFCC1	chr2	108.144		LOC100037887	scaffold_7316	2094
AMEXTC_0340000155586_MKRN2	chr2	108.144		mkrn1-like	Chr03	190498
AMEXTC_0340000162712_RAB43	chr2	108.144		rab19	Chr03	208445
AMEXTC_0340000054827_acad9.S	chr2	108.144		Xetrov90025933m	scaffold_1134	11606
AMEXTC_0340000045439_SYN2	chr2	108.144		Xetrov90026922m	scaffold_192	19514
AMEXTC_0340000248302_dnah1	chr2	112.488		dnah1	Chr04	117725404
AMEXTC_0340000149640_DNAH1	chr2	112.488		dnah1	Chr04	117725404
AMEXTC_0340000237954_twf2	chr2	112.488		twf2	Chr04	117798541
AMEXTC_0340000022152_SEMA3G	chr2	114.616		sema3e	Chr03	70448465
AMEXTC_0340000024516_acy1	chr2	114.616		Xetrov90012608m	Chr04	117691328
AMEXTC_0340000241859_LOC110084490	chr2	116.744		LOC101731864	Chr04	117646987
AMEXTC_0340000229577_NPRL2	chr2	116.744		nprl2	Chr04	117508303
AMEXTC_0340000208804_PARP3	chr2	116.744		parp3	Chr04	117630448
AMEXTC_0340000047057_CACNA2D2	chr2	123.42		cacna2d2	Chr04	117427682
AMEXTC_0340000159671_CISH	chr2	123.42		cish	Chr04	117186306
AMEXTC_0340000045065_LOC108801950	chr2	123.42		LOC733765	Chr04	117484940
AMEXTC_0340000008876_DAG1	chr2	127.771		dag1	Chr04	115316668
AMEXTC_0340000151531_LOC102347931	chr2	127.771		LOC101731177	scaffold_4907	2200
AMEXTC_0340000261197_actn4	chr2	129.899		actn4	Chr08	59502121
AMEXTC_0340000249362_LOC102352874	chr2	129.899		apeh	Chr04	115525919
AMEXTC_0340000031578_BSN	chr2	129.899		bsn	Chr04	114756782
AMEXTC_0340000132213_FANCD2OS	chr2	129.899		fancd2os	Chr04	114261830
AMEXTC_0340000002650_rod	chr2	129.899		gnat1	Chr04	116413511
AMEXTC_0340000054094_LSU	chr2	129.899		hnrnpl	Chr08	59442099
AMEXTC_0340000175123_HYAL2	chr2	129.899		hyal2	Chr04	116749535
AMEXTC_0340000007534_IP6K1	chr2	129.899		ip6k1	Chr04	115650180
AMEXTC_0340000044197_lgals4-a	chr2	129.899		lgals4	Chr08	59403212
AMEXTC_0340000206958_NCCRP1-like	chr2	129.899		LOC100486595-like	Chr08	59768363
AMEXTC_0340000188809_LOC109692687	chr2	129.899		LOC101732555	Chr09	317834
AMEXTC_0340000211531_MANF	chr2	129.899		manf	Chr04	116954704
AMEXTC_0340000162936_MST1R	chr2	129.899		mst1r	Chr04	116002560
AMEXTC_0340000176096_PAK4	chr2	129.899		pak4	Chr08	59732921
AMEXTC_0340000021066_acp7	chr2	129.899		papl	Chr08	59698775
AMEXTC_0340000182024_RAD54L2	chr2	129.899		rad54l2	Chr04	116865498
AMEXTC_0340000144496_RBM5	chr2	129.899		rbm5	Chr04	115901697
AMEXTC_0340000048904_RINL	chr2	129.899		rin3	Chr08	66448642
AMEXTC_0340000223100_SARS2	chr2	129.899		sars2	Chr08	59641726
AMEXTC_0340000231764_SEMA3B	chr2	129.899		sema3b	Chr04	116636459
AMEXTC_0340000028419_SLC38A3	chr2	129.899		slc38a3	Chr04	116456973
AMEXTC_0340000095141_toll-like	chr2	129.899		tlr9	Chr04	115784805
AMEXTC_0340000237704_DCAF1	chr2	129.899		vprbp-like	Chr04	116900981
AMEXTC_0340000151980_zmynd10.L	chr2	129.899		zmynd10	Chr04	116843846
AMEXTC_0340000056116_RASSF1	chr2	129.899		Xetrov90012580m	Chr04	116811648
AMEXTC_0340000172710_plekhg2	chr2	129.899		Xetrov90021079m	Chr08	60534684
AMEXTC_0340000060856_med29.L	chr2	132.027		med29	Chr08	60310001
AMEXTC_0340000054413_PAF1	chr2	132.027		paf1	Chr08	60290984
AMEXTC_0340000269268_LOC102350225	chr2	132.027		socs5	Chr05	16154213
AMEXTC_0340000036572_LRFN1	chr2	134.155		lrfn1	Chr08	59911621
AMEXTC_0340000046113_LOC102346949	chr2	136.262		cdkl1	Chr08	71887654
AMEXTC_0340000010169_CLIP3	chr2	136.262		clip3	Chr08	59331849
AMEXTC_0340000139942_eif3k.S	chr2	136.262		eif3k	Chr08	59318346
AMEXTC_0340000199670_BICRA	chr2	136.262		gltscr1	Chr08	58674519
AMEXTC_0340000216588_kptn	chr2	136.262		kptn	Chr08	58749270
AMEXTC_0340000200758_LOC102936453	chr2	136.262		LOC100486384-like	Chr07	102560002
AMEXTC_0340000058281_LOC100127267.L	chr2	136.262		LOC100494922	Chr08	58606162
AMEXTC_0340000156247_MGC83907	chr2	136.262		LOC100495220-like	Chr08	59096602
AMEXTC_0340000301920_SUPT5H	chr2	136.262		supt5h	Chr08	60552800
AMEXTC_0340000062670_LOC106557086	chr2	136.262		tmem87a-like	Chr08	93680900
AMEXTC_0340000015575_ryanodine	chr2	136.262		Xetrov90021037m	Chr08	59132996
AMEXTC_0340000040438_AXL	chr2	145.378		axl	Chr08	57958031
AMEXTC_0340000217881_bckdha	chr2	145.378		bckdha	Chr08	58355956
AMEXTC_0340000045286_CRX	chr2	145.378		crx	Chr08	58432617
AMEXTC_0340000002098_EHD2	chr2	145.378		ehd2	Chr08	58578040
AMEXTC_0340000212054_exosc5.L	chr2	145.378		exosc5	Chr08	58343260
AMEXTC_0340000130139_Hnrnpul1	chr2	145.378		hnrnpul1	Chr08	58049541
AMEXTC_0340000038650_tmem91	chr2	145.378		LOC100486436-like	Chr08	58328204
AMEXTC_0340000049268_cyp2g1p	chr2	145.378		LOC100497657-like	Chr08	57879345
AMEXTC_0340000014632_LOC100498119	chr2	145.378		LOC100498119	Chr08	58033011
AMEXTC_0340000004274_MEIS3	chr2	145.378		meis3	Chr08	58917012
AMEXTC_0340000005185_LOC108801799	chr2	145.378		olfm4	Chr08	58013003
AMEXTC_0340000023441_SPRED3	chr2	145.378		spred3	Chr08	59032599
AMEXTC_0340000169013_ITPKC	chr2	147.506		itpkc	Chr08	57290452
AMEXTC_0340000202595_rab4b	chr2	147.506		rab4b	Chr08	57444573
AMEXTC_0340000000141_hypothetical	chr2	147.506		Xetrov90020984m	Chr08	57553355
AMEXTC_0340000198004_MAP3K10	chr2	149.634		map3k10	Chr08	56445109
AMEXTC_0340000049867_NUMBL	chr2	149.634		numbl	Chr08	57174386
AMEXTC_0340000017282_PRX	chr2	153.985		prx	Chr08	57135755
AMEXTC_0340000221764_sertad3	chr2	153.985		sertad3	Chr08	57048008
AMEXTC_0340000020409_shkbp1.L	chr2	158.335		LOC100486587-like	Chr08	56863883
AMEXTC_0340000016188_LOC108698608	chr2	158.335		ltbp4	Chr08	56581446
AMEXTC_0340000052583_LOC733726	chr2	158.335		MGC69520	Chr08	56921420
AMEXTC_0340000043986_SPTBN4	chr2	158.335		sptbn4	Chr08	56942860
AMEXTC_0340000168191_kcnk6.L	chr2	160.463		kcnk6	Chr08	56135159
AMEXTC_0340000027616_LOC108698602	chr2	160.463		Xetrov90020943m	Chr08	56161445
AMEXTC_0340000145148_ZC3H4	chr2	162.591		LOC100145628	Chr08	55951603
AMEXTC_0340000141824_SAE1	chr2	162.591		sae1	Chr08	55895975
AMEXTC_0340000127172_LOC108645345	chr2	162.591		Xetrov90005312m	Chr02	77347281
AMEXTC_0340000127172_LOC108645345	chr2	162.591		Xetrov90022827m	Chr09	5602383
AMEXTC_0340000127172_LOC108645345	chr2	162.591		Xetrov90023742m	Chr09	34482587
AMEXTC_0340000127172_LOC108645345	chr2	162.591		Xetrov90024563m	Chr09	79379071
AMEXTC_0340000127172_LOC108645345	chr2	162.591		Xetrov90026014m	scaffold_1224	10901
AMEXTC_0340000127172_LOC108645345	chr2	162.591		Xetrov90030611m	scaffold_82	793280
AMEXTC_0340000062632_LOC102564239	chr2	164.719		ccdc9	Chr08	55748234
AMEXTC_0340000204076_DACT3	chr2	166.847		dact1	Chr08	83069930
AMEXTC_0340000051673_LOC109913156	chr2	166.847		degs3	Chr08	50247316
AMEXTC_0340000061192_LOC100485380	chr2	166.847		LOC100491909	Chr05	4603608
AMEXTC_0340000267540_PRKD2	chr2	166.847		prkd1	Chr08	92602529
AMEXTC_0340000040625_PTGIR	chr2	166.847		ptgir	Chr08	49208917
AMEXTC_0340000294776_strn4	chr2	166.847		strn	Chr05	39402052
AMEXTC_0340000294776_strn4	chr2	166.847		strn3	Chr08	92922393
AMEXTC_0340000020249_dopamine	chr2	168.986		LOC100493063	Chr07	72856189
AMEXTC_0340000180886_WDR62	chr2	168.986		mapkbp1	Chr08	84732883
AMEXTC_0340000009716_NCAM-180	chr2	168.986		ncam1	Chr07	72411401
AMEXTC_0340000026861_TTC12	chr2	168.986		Xetrov90018561m	Chr07	72606244
AMEXTC_0340000162845_TTC12	chr2	168.986		Xetrov90018561m	Chr07	72606244
AMEXTC_0340000165410_LOC102352047	chr2	175.476		trappc6a	Chr08	50308189
AMEXTC_0340000169015_FAM46A	chr2	175.476		fam46a	Chr05	80205014
AMEXTC_0340000263244_PRDM9	chr2	177.604		LOC101735177-like	Chr09	29727720
AMEXTC_0340000293230_TBCB	chr2	177.604		tbcb	Chr08	50223589
AMEXTC_0340000011066_CLPTM1	chr2	179.732		clptm1-like	Chr08	49989184
AMEXTC_0340000000584_DMPK	chr2	181.86		cdc42bpb	Chr08	77051387
AMEXTC_0340000143954_ercc2	chr2	181.86		ercc2	Chr08	49670870
AMEXTC_0340000120347_FOXA3	chr2	181.86		foxa2	Chr05	25797335
AMEXTC_0340000256787_LOC102938719	chr2	181.86		gemin7	Chr08	50086284
AMEXTC_0340000022316_LOC103368325	chr2	181.86		klc1	Chr08	77660710
AMEXTC_0340000192435_MARK4	chr2	181.86		mark3	Chr08	77446227
AMEXTC_0340000143473_SYMPK	chr2	181.86		sympk	Chr08	49859054
AMEXTC_0340000053727_LOC101390241	chr2	183.988		antxr2	Chr01	76300334
AMEXTC_0340000298955_ATG2A	chr2	183.988		atg2a	Chr04	38423155
AMEXTC_0340000033936_CTSF	chr2	183.988		ctsf	Chr04	42281276
AMEXTC_0340000187575_EHD1	chr2	183.988		ehd1	Chr04	38542884
AMEXTC_0340000043346_GNGT1	chr2	183.988		gngt1	Chr06	24361460
AMEXTC_0340000251208_sptbn2	chr2	183.988		LOC100486199-like	Chr04	36675591
AMEXTC_0340000012590_LOC109921646	chr2	183.988		LOC100490946	Chr04	38413181
AMEXTC_0340000217961_LOC102937000	chr2	183.988		LOC100491113-like	Chr04	38472336
AMEXTC_0340000004419_EML2	chr2	183.988		LOC100495318-like	Chr08	75532517
AMEXTC_0340000007636_lrfn4.L	chr2	183.988		lrfn2-like	Chr04	42468596
AMEXTC_0340000250442_LOC109936340	chr2	183.988		prokr2	Chr05	31241713
AMEXTC_0340000135314_RBM4B	chr2	183.988		rbm4b	Chr04	36786900
AMEXTC_0340000208106_RCE1	chr2	183.988		rce1	Chr04	36438615
AMEXTC_0340000180353_RECK	chr2	183.988		reck	Chr06	69993686
AMEXTC_0340000202492_SCYL1	chr2	183.988		scyl1	Chr04	38824634
AMEXTC_0340000223671_pc.2	chr2	183.988		Xetrov90011196m	Chr04	42464714
AMEXTC_0340000026176_RELA	chr2	186.116		rela	Chr04	37143754
AMEXTC_0340000220945_zdhhc24.L	chr2	186.116		zdhhc24	Chr04	36517338
AMEXTC_0340000185707_LOC102933292	chr2	186.116		B3GNT2	.	.
AMEXTC_0340000301828_OVOL1	chr2	186.116		Xetrov90011013m	Chr04	37736758
AMEXTC_0340000022044_LOC109957217	chr2	188.244		axl	Chr08	57958031
AMEXTC_0340000010391_KLC2	chr2	188.244		klc1	Chr08	77660710
AMEXTC_0340000059940_LOC109922124	chr2	188.244		LOC100145466	scaffold_6955	2
AMEXTC_0340000163447_NTPCR	chr2	188.244		ntpcr	Chr05	61282278
AMEXTC_0340000237277_NUDT22	chr2	188.244		nudt22	Chr04	40274767
AMEXTC_0340000214557_RAB1B	chr2	188.244		rab1a	Chr05	29388654
AMEXTC_0340000049896_SIPA1	chr2	188.244		sipa1-like	Chr04	42953974
AMEXTC_0340000063562_UGP2	chr2	188.244		ugp2	Chr05	28705436
AMEXTC_0340000235236_YIF1A	chr2	188.244		yif1b	Chr08	56120295
AMEXTC_0340000170455_BRMS1	chr2	190.372		brms1	Chr04	37368877
AMEXTC_0340000020999_LOC100124841	chr2	190.372		LOC100124841	Chr04	37311946
AMEXTC_0340000029733_GAL3ST3	chr2	190.372		LOC100487128	Chr05	126188695
AMEXTC_0340000216027_CD248	chr2	190.372		LOC101732937	Chr04	37262990
AMEXTC_0340000000641_NPAS4	chr2	190.372		npas4	Chr04	37603744
AMEXTC_0340000061293_RIN2	chr2	190.372		rin1	Chr04	37342193
AMEXTC_0340000063783_LOC714747	chr2	190.372		sf3b2	Chr04	42745850
AMEXTC_0340000036170_SLC29A2	chr2	190.372		slc29a2	Chr04	37470962
AMEXTC_0340000148266_ACTR2	chr2	192.5		actr2	Chr05	29456222
AMEXTC_0340000224201_capn1	chr2	192.5		capn1-like.1	Chr04	35495275
AMEXTC_0340000164947_DNA2	chr2	192.5		dna2	Chr07	32127864
AMEXTC_0340000247207_DPF2	chr2	192.5		dpf2	Chr04	36189162
AMEXTC_0340000056878_DPP3	chr2	192.5		dpp3	Chr04	37618002
AMEXTC_0340000186093_LGALS12	chr2	192.5		lgals12-like	Chr04	35951670
AMEXTC_0340000031576_NAALADL1	chr2	192.5		LOC100487005	Chr05	143059167
AMEXTC_0340000036715_PELI3	chr2	192.5		peli2	Chr05	28834853
AMEXTC_0340000231026_VPS51	chr2	192.5		vps51	Chr04	38574357
AMEXTC_0340000015090_LOC100490266	chr2	192.5		Xetrov90010951m	Chr04	36003417
AMEXTC_0340000036517_CCDC85B	chr2	194.628		ccdc85b	Chr04	37863394
AMEXTC_0340000214463_c11orf95	chr2	194.628		LOC100492912-like	Chr04	41074860
AMEXTC_0340000230479_PYGM	chr2	196.756		LOC100491051-like	Chr04	43098213
AMEXTC_0340000238282_LOC103282338	chr2	196.756		LOC101733706-like	Chr04	43159928
AMEXTC_0340000048692_LTBP3	chr2	196.756		ltbp3	Chr04	42996739
AMEXTC_0340000020153_MAP4K2	chr2	196.756		map4k5	Chr08	72027859
AMEXTC_0340000057937_SF1	chr2	196.756		sf1	Chr04	43056971
AMEXTC_0340000065689_nuclear	chr2	203.233		act3	Chr04	40843275
AMEXTC_0340000065689_nuclear	chr2	203.233		acta1	Chr05	61478962
AMEXTC_0340000065689_nuclear	chr2	203.233		actc1	Chr08	91483893
AMEXTC_0340000167767_ESRRA	chr2	203.233		esrra	Chr04	39939444
AMEXTC_0340000045708_FERMT3	chr2	203.233		fermt3	Chr04	40390427
AMEXTC_0340000031444_FLRT1	chr2	203.233		flrt1	Chr04	40598215
AMEXTC_0340000054404_Foxn2	chr2	203.233		foxn3	Chr08	65215517
AMEXTC_0340000217855_RPS6KA5	chr2	203.233		LOC100486973-like	Chr04	41367454
AMEXTC_0340000018021_MACROD1	chr2	203.233		macrod1-like	Chr04	40426287
AMEXTC_0340000065689_nuclear	chr2	203.233		MGC75582	Chr01	132931026
AMEXTC_0340000237968_NAA40	chr2	203.233		naa40	Chr04	40850090
AMEXTC_0340000016158_NRXN2	chr2	203.233		nrxn2-like.2	Chr04	43423278
AMEXTC_0340000007721_NRXN2	chr2	203.233		nrxn2-like.2	Chr04	43423278
AMEXTC_0340000063717_PRDX5	chr2	203.233		prdx5	Chr04	39881115
AMEXTC_0340000005577_LOC101937511	chr2	203.233		prox1	Chr05	9973310
AMEXTC_0340000249724_LOC102352268	chr2	203.233		tgfb2	Chr05	7682037
AMEXTC_0340000156160_TRPT1	chr2	203.233		trpt1-like	Chr04	40378754
AMEXTC_0340000017090_LOC107292401	chr2	205.361		adss	Chr05	60541815
AMEXTC_0340000011149_NXF1	chr2	205.361		nxf1	Chr04	41229906
AMEXTC_0340000212154_WDR74	chr2	205.361		wdr74	Chr04	41212496
AMEXTC_0340000260771_BSCL2	chr2	205.361		Xetrov90011100m	Chr04	39804646
AMEXTC_0340000227835_AHNAK	chr2	207.489		ahnak-like	Chr04	41414832
AMEXTC_0340000122053_AHNAK	chr2	207.489		ahnak-like	Chr04	41414832
AMEXTC_0340000239016_LOC102359903	chr2	207.489		cerk	Chr08	8001628
AMEXTC_0340000019109_EML3	chr2	207.489		eml3	Chr04	41585277
AMEXTC_0340000042030_GANAB	chr2	207.489		ganab-like	Chr04	41655903
AMEXTC_0340000047647_iqsec2	chr2	207.489		iqsec2-like	Chr08	7515285
AMEXTC_0340000000092_rom1	chr2	207.489		LOC100493249	Chr04	41631769
AMEXTC_0340000145363_wdr45	chr2	207.489		LOC101732377	Chr02	132812018
AMEXTC_0340000240538_PRICKLE3	chr2	207.489		prickle2	Chr04	132406108
AMEXTC_0340000232405_ribc1	chr2	207.489		ribc1	Chr08	2306442
AMEXTC_0340000198971_LOC110089195	chr2	207.489		tspyl2	Chr08	7620511
AMEXTC_0340000227262_hypothetical	chr2	207.489		tut1	Chr04	41542163
AMEXTC_0340000240416_B3GAT3	chr2	207.489		B3GAT3	.	.
AMEXTC_0340000054239_Znf7	chr2	207.489		Xetrov90017985m	Chr07	36834473
AMEXTC_0340000042533_fam120c	chr2	209.617		fam120c	Chr08	8350905
AMEXTC_0340000027455_FGD1	chr2	209.617		fgd1-like	Chr08	8245935
AMEXTC_0340000233543_HUWE1	chr2	209.617		huwe1	Chr08	8393331
AMEXTC_0340000063422_huwe1	chr2	209.617		huwe1	Chr08	8393331
AMEXTC_0340000191685_alas2	chr2	211.745		alas2	Chr08	2277015
AMEXTC_0340000217901_APEX2	chr2	211.745		apex2	Chr08	2267905
AMEXTC_0340000027275_ITIH6	chr2	211.745		LOC100488634	Chr08	8553337
AMEXTC_0340000031904_PFKFB1	chr2	211.745		LOC100488795-like	Chr08	8617034
AMEXTC_0340000129028_deoxyribonuclease	chr2	211.745		LOC100492611-like	Chr08	3889497
AMEXTC_0340000193726_LOC108698330	chr2	211.745		LOC100493164-like	Chr08	23237801
AMEXTC_0340000056847_trex2	chr2	211.745		trex2	Chr08	2294751
AMEXTC_0340000136685_TREX2	chr2	211.745		trex2	Chr08	2294751
AMEXTC_0340000246011_pkm	chr2	211.745		pkm	Chr03	82467007
AMEXTC_0340000062036_BGN	chr2	213.873		bgn	Chr08	3696600
AMEXTC_0340000058278_LOC108798378	chr2	213.873		Xetrov90012503m	Chr04	113630267
AMEXTC_0340000157537_SLC6A8	chr2	216.842		LOC100489909-like	Chr08	3266725
AMEXTC_0340000055683_idh3g	chr2	218.107		idh3g	Chr08	8969028
AMEXTC_0340000031638_l1cam	chr2	218.107		l1cam	Chr08	8743846
AMEXTC_0340000009592_Pdzd4	chr2	218.107		pdzd4	Chr08	8894735
AMEXTC_0340000247999_plxnb3.S	chr2	218.107		plxnb3	Chr08	3112250
AMEXTC_0340000221058_hypothetical	chr2	218.107		ssr4-like	Chr08	8964012
AMEXTC_0340000020582_ARHGAP4	chr2	220.235		arhgap4	Chr08	14121901
AMEXTC_0340000038538_V2-type	chr2	220.235		avpr2	Chr08	12415792
AMEXTC_0340000003132_flna	chr2	220.235		flna	Chr08	11803377
AMEXTC_0340000166195_LOC108698082	chr2	220.235		plxna3	scaffold_247	221479
AMEXTC_0340000059846_RENBP	chr2	220.235		renbp	Chr08	14230312
AMEXTC_0340000053070_RPL10	chr2	220.235		rpl10	scaffold_247	22260
AMEXTC_0340000266531_tktl2.L	chr2	220.235		tktl2	Chr08	14475097
AMEXTC_0340000218622_TMEM187	chr2	220.235		tmem187	Chr08	12186013
AMEXTC_0340000233564_tafazzin	chr2	220.235		Xetrov90027507m	scaffold_247	107372
AMEXTC_0340000218637_CCDC120	chr2	224.586		frmd4b-like	Chr04	131223615
AMEXTC_0340000001499_TNRC18	chr2	224.586		LOC100491423	Chr09	38292048
AMEXTC_0340000175177_UBA1	chr2	224.586		LOC100495145-like	scaffold_5608	278
AMEXTC_0340000057244_WIPI2	chr2	224.586		LOC100497399-like	Chr09	43977597
AMEXTC_0340000222344_AP5Z1	chr2	224.586		LOC100497560	scaffold_8947	665
AMEXTC_0340000183489_PIM2	chr2	224.586		pim1	Chr04	126438343
AMEXTC_0340000249078_RADIL	chr2	224.586		rasip1-like	Chr07	97741645
AMEXTC_0340000269340_unnamed	chr2	224.586		rhoa	Chr04	115470283
AMEXTC_0340000269340_unnamed	chr2	224.586		rhoa.2	scaffold_7481	751
AMEXTC_0340000214667_FBXL18	chr2	226.714		fbxl18-like	Chr09	38500120
AMEXTC_0340000117228_LOC101391786	chr2	228.842		actb	Chr09	38239278
AMEXTC_0340000055421_cytoplasmic	chr2	228.842		actb	Chr09	38239278
AMEXTC_0340000117228_LOC101391786	chr2	228.842		actg1	Chr10	20568345
AMEXTC_0340000055421_cytoplasmic	chr2	228.842		actg1	Chr10	20568345
AMEXTC_0340000217064_FSCN1	chr2	228.842		fscn1	Chr09	38524299
AMEXTC_0340000008279_LOC101952591	chr2	228.842		LOC101731385	Chr03	39788552
AMEXTC_0340000208113_hypothetical	chr2	230.97		arpc1a	Chr09	32905568
AMEXTC_0340000204350_ARPC1B	chr2	230.97		arpc1b	Chr09	32803126
AMEXTC_0340000263234_CPPED1	chr2	230.97		cpped1	Chr09	28992863
AMEXTC_0340000145612_kpna7.S	chr2	230.97		kpna7	Chr09	38771710
AMEXTC_0340000027035_hypothetical	chr2	230.97		LOC101734108	Chr01	82310808
AMEXTC_0340000027035_hypothetical	chr2	230.97		LOC101734175	Chr01	82296754
AMEXTC_0340000023019_hypothetical	chr2	230.97		Xetrov90023650m	Chr09	29269688
AMEXTC_0340000065945_Aimp2	chr2	237.448		aimp2	Chr09	19731994
AMEXTC_0340000138491_arl6ip1	chr2	237.448		arl6ip1	Chr09	26944913
AMEXTC_0340000181689_CDR2	chr2	237.448		cdr2	Chr09	19282872
AMEXTC_0340000017394_EEF2K	chr2	237.448		eef2k	Chr09	19064362
AMEXTC_0340000241494_gspt1	chr2	237.448		gspt1	Chr09	28512689
AMEXTC_0340000290162_KDELR2	chr2	237.448		kdelr1	Chr09	19416397
AMEXTC_0340000012394_LMTK2	chr2	237.448		lmtk2	Chr09	20057470
AMEXTC_0340000063174_LOC101932182	chr2	237.448		LOC100486607	Chr09	19307115
AMEXTC_0340000000783_LOC109933425	chr2	237.448		LOC100494894	Chr09	12320021
AMEXTC_0340000143270_OTOA	chr2	237.448		otoa	Chr09	19348432
AMEXTC_0340000056315_RRN3	chr2	237.448		rrn3	Chr09	28434670
AMEXTC_0340000182656_USP42	chr2	237.448		usp42	Chr09	19451156
AMEXTC_0340000187175_VWA3A	chr2	237.448		vwa3a	Chr09	18974565
AMEXTC_0340000008174_unnamed	chr2	237.448		Xetrov90018366m	Chr07	60387747
AMEXTC_0340000004844_ALKBH5	chr2	239.576		alkbh5	Chr09	10268342
AMEXTC_0340000159498_DACT1	chr2	239.576		dact1	Chr08	83069930
AMEXTC_0340000188938_EPN2	chr2	239.576		epn1	Chr09	12582955
AMEXTC_0340000271047_FLII	chr2	239.576		flii	Chr09	10197366
AMEXTC_0340000053318_gid4	chr2	239.576		gid4	Chr09	9522756
AMEXTC_0340000011470_LLGL1	chr2	239.576		llgl1	Chr09	10218608
AMEXTC_0340000293218_SHMT1	chr2	239.576		shmt1	Chr09	10139778
AMEXTC_0340000036908_TOM1L2	chr2	239.576		tom1l2-like	Chr09	9551041
AMEXTC_0340000182949_TOP3A	chr2	239.576		top3a	Chr09	10173773
AMEXTC_0340000160329_RASD1	chr2	241.704		rasd1	Chr09	9929017
AMEXTC_0340000176580_COPS3	chr2	243.832		cops3	Chr09	9996949
AMEXTC_0340000157279_FLCN	chr2	243.832		flcn	Chr09	10012256
AMEXTC_0340000238363_Pld6	chr2	243.832		LOC101734265	Chr09	10024668
AMEXTC_0340000025500_MPRIP	chr2	243.832		mprip-like	Chr09	9428682
AMEXTC_0340000191003_DHRS7B	chr2	259.344		dhrs7b	Chr09	33066385
AMEXTC_0340000040829_kcnj12	chr2	262.206		LOC100496092-like	Chr09	38856163
AMEXTC_0340000165924_ngfr	chr2	295.041		ngfr	Chr06	4218769
AMEXTC_0340000137795_aurkb.L	chr2	323.964		aurkb	Chr03	131830242
AMEXTC_0340000018037_LOC108719793	chr2	323.964		cspg5	scaffold_237	222181
AMEXTC_0340000247133_HSPA9	chr2	323.964		hspa9	Chr03	9650752
AMEXTC_0340000196628_LOC101936582	chr2	323.964		LOC100486661	scaffold_499	13865
AMEXTC_0340000196628_LOC101936582	chr2	323.964		LOC100486661	scaffold_499	13865
AMEXTC_0340000154534_LOC101950183	chr2	323.964		LOC100486661	scaffold_499	13865
AMEXTC_0340000072232_LOC102566478	chr2	323.964		LOC100486918	scaffold_596	19371
AMEXTC_0340000072232_LOC102566478	chr2	323.964		LOC100491922-like	scaffold_346	35453
AMEXTC_0340000203903_LOC101944371	chr2	323.964		LOC100496812	scaffold_346	74300
AMEXTC_0340000264999_zbed6cl	chr2	323.964		LOC101730718-like	scaffold_208	63567
AMEXTC_0340000177912_LOC108718651	chr2	323.964		LOC101731566	scaffold_208	167503
AMEXTC_0340000039567_MYO1G	chr2	323.964		myo1d-like	Chr10	6697692
AMEXTC_0340000209916_NACAD	chr2	323.964		naca	Chr06	4950336
AMEXTC_0340000157004_NBEAL2	chr2	323.964		nbeal2	Chr06	5025448
AMEXTC_0340000190671_SCAP	chr2	323.964		scap	scaffold_394	48058
AMEXTC_0340000214416_LOC101601417	chr2	323.964		znf250	scaffold_208	306580
AMEXTC_0340000181488_Dhx30	chr2	323.964		Xetrov90015539m	Chr06	5266468
AMEXTC_0340000039226_sept12	chr2	328.22		43355	Chr09	8492650
AMEXTC_0340000045937_LOC110159626	chr2	328.22		asic1-like.2	Chr02	145882854
AMEXTC_0340000162248_AXIN1	chr2	328.22		axin1	Chr09	9321325
AMEXTC_0340000036094_cdk5	chr2	328.22		cdk17	Chr03	40986997
AMEXTC_0340000174299_CREBBP	chr2	328.22		crebbp	Chr09	14744555
AMEXTC_0340000165772_DNAJA3	chr2	328.22		dnaja3	Chr09	14430922
AMEXTC_0340000184702_eci1	chr2	328.22		eci1	Chr09	14358748
AMEXTC_0340000069295_minor	chr2	328.22		hba1	Chr09	36996497
AMEXTC_0340000070102_beta	chr2	328.22		hbg1	Chr09	36985790
AMEXTC_0340000241639_iqca1	chr2	328.22		iqca1	Chr09	54795655
AMEXTC_0340000063320_LOC108792455	chr2	328.22		LOC100486661	scaffold_499	13865
AMEXTC_0340000063320_LOC108792455	chr2	328.22		LOC100490776	Chr08	100686527
AMEXTC_0340000032884_hypothetical	chr2	328.22		LOC100492299	Chr09	8974421
AMEXTC_0340000053864_LOC104684927	chr2	328.22		LOC100492460	Chr09	8826934
AMEXTC_0340000063320_LOC108792455	chr2	328.22		LOC100492859	Chr10	34782108
AMEXTC_0340000063320_LOC108792455	chr2	328.22		LOC100495066-like	Chr08	43656849
AMEXTC_0340000024275_LOC101872464	chr2	328.22		LOC101735130	scaffold_7920	173
AMEXTC_0340000030742_LOC101870270	chr2	328.22		lrig3	Chr03	53736851
AMEXTC_0340000025319_E3	chr2	328.22		mgrn1	scaffold_458	715
AMEXTC_0340000212001_nos3	chr2	328.22		nos3	Chr06	361
AMEXTC_0340000057361_PDIA2	chr2	328.22		pdia2	Chr09	9296722
AMEXTC_0340000026147_PPL	chr2	328.22		ppl	Chr09	8722416
AMEXTC_0340000015070_RBFOX1	chr2	328.22		rbfox3-like	Chr10	11992452
AMEXTC_0340000063320_LOC108792455	chr2	328.22		Xetrov90001666m	Chr01	86195277
AMEXTC_0340000042869_LOC109975224	chr2	328.22		Xetrov90021173m	Chr08	62718768
AMEXTC_0340000046289_RHBDL1	chr2	328.22		Xetrov90023090m	Chr09	9070961
AMEXTC_0340000006233_LOC102574404	chr2	330.348		coro7	Chr09	14444066
AMEXTC_0340000020006_GLIS2	chr2	330.348		glis2-like	Chr09	14536981
AMEXTC_0340000027487_LOC101950270	chr2	330.348		LOC100487239	Chr09	14951990
AMEXTC_0340000017158_SLX4	chr2	330.348		slx4	Chr09	14814768
AMEXTC_0340000012092_SRL	chr2	330.348		srl-like	Chr09	14631288
AMEXTC_0340000175500_TFAP4	chr2	330.348		tfap4	Chr09	14575083
AMEXTC_0340000224424_TRAP1	chr2	330.348		trap1-like	Chr09	14796782
AMEXTC_0340000026924_VASN	chr2	330.348		vasn	Chr09	14484729
AMEXTC_0340000017383_ABCA3	chr2	332.476		abca3-like	Chr09	15776896
AMEXTC_0340000182814_CAPN15	chr2	332.476		capn15	Chr09	15306899
AMEXTC_0340000232634_DECR2	chr2	332.476		decr2-like	Chr09	15210796
AMEXTC_0340000154687_HMOX2	chr2	332.476		hmox1	Chr04	105622741
AMEXTC_0340000021317_RAB11FIP3	chr2	332.476		LOC100486615	Chr09	15230975
AMEXTC_0340000227726_ASB8	chr2	332.476		LOC100486931	Chr09	15368137
AMEXTC_0340000132638_NME4	chr2	332.476		nme4	Chr09	15200553
AMEXTC_0340000009162_LOC110086928	chr2	336.732		nog2	Chr09	16169689
AMEXTC_0340000021869_LOC101933514	chr2	336.732		ntn3-like	Chr09	16062790
AMEXTC_0340000267508_ATP6V0C	chr2	343.408		atp6v0c	Chr09	15952990
AMEXTC_0340000058435_LOC101951698	chr2	343.408		MGC145260	Chr09	15888022
AMEXTC_0340000003146_LOC105481505	chr2	343.408		rnps1	Chr09	15857272
AMEXTC_0340000224140_tbc1d24.1.L	chr2	343.408		tbc1d24.1	Chr09	15993247
AMEXTC_0340000301506_TELO2	chr2	343.408		telo2	Chr09	15618211
AMEXTC_0340000234539_CCDC78	chr2	344.599		ccdc78	scaffold_458	13284
AMEXTC_0340000017659_FBXL16	chr2	344.599		fbxl16	scaffold_458	50553
AMEXTC_0340000026338_GCC2	chr2	344.599		gcc2	Chr02	105831232
AMEXTC_0340000061280_IGFALS	chr2	344.599		igfals	scaffold_458	6357
AMEXTC_0340000180214_LOC100487982.L	chr2	344.599		LOC100487982-like	Chr09	16630152
AMEXTC_0340000019350_mapk8ip3	chr2	344.599		mapk8ip3	Chr09	16648701
AMEXTC_0340000061057_CCDC57	chr2	344.599		phactr1	Chr06	85722977
AMEXTC_0340000166534_LOC101931165	chr2	345.514		nomo3	Chr09	27879988
AMEXTC_0340000054701_LOC102349279	chr2	356.758		cyb5r4	Chr05	87982961
AMEXTC_0340000146643_IBA57	chr2	356.758		iba57	Chr06	2371786
AMEXTC_0340000012227_LOC104044042	chr2	356.758		pth1r	Chr06	3738746
AMEXTC_0340000009927_pth1r	chr2	356.758		pth1r	Chr06	3738746
AMEXTC_0340000002238_LOC104048564	chr2	356.758		Xetrov90015472m	Chr06	2160129
AMEXTC_0340000027841_LOC104500841	chr2	356.758		Xetrov90015472m	Chr06	2160129
AMEXTC_0340000016267_LOC101950450	chr2	377.596		c16orf45	Chr09	28224425
AMEXTC_0340000225100_COQ7	chr2	377.596		coq7	Chr09	26926911
AMEXTC_0340000271284_FOPNL	chr2	377.596		fopnl-like	Chr09	28082404
AMEXTC_0340000165495_GDE1	chr2	377.596		gde1	Chr09	25932397
AMEXTC_0340000204086_MARF1	chr2	377.596		kiaa0430	Chr09	28190114
AMEXTC_0340000220768_MYH11	chr2	377.596		LOC100490639-like	Chr09	28107811
AMEXTC_0340000243253_LOC108798328	chr2	377.596		LOC100493037	Chr09	27941865
AMEXTC_0340000018591_NDE1	chr2	377.596		nde1	Chr09	28172639
AMEXTC_0340000062817_NTAN1	chr2	377.596		ntan1	Chr09	28413524
AMEXTC_0340000008306_PDXDC1	chr2	377.596		pdxdc1	Chr09	28384920
AMEXTC_0340000031126_TMC5	chr2	377.596		tmc5	Chr09	26525510
AMEXTC_0340000035467_gprc5b	chr2	380.502		gprc5b-like	Chr09	26129557
AMEXTC_0340000237159_acsm3	chr2	386.34		acsm3	Chr09	18465747
AMEXTC_0340000052548_GET4	chr2	386.34		get4	Chr09	22298559
AMEXTC_0340000118255_pdilt	chr2	386.34		pdilt	Chr09	18435564
AMEXTC_0340000042431_THUMPD1	chr2	386.34		thumpd1	Chr09	28489263
AMEXTC_0340000077300_tsr3	chr2	386.34		tsr3	Chr09	22694346
AMEXTC_0340000009879_ZFAND2A	chr2	386.34		zfand2a	Chr09	23327276
AMEXTC_0340000201934_chtf18	chr2	388.468		chtf18	Chr09	10510275
AMEXTC_0340000215514_LOC100158433.S	chr2	388.468		LOC779553-like	Chr09	10465105
AMEXTC_0340000085831_msln	chr2	388.468		msln-like.1	Chr09	10595136
AMEXTC_0340000085831_msln	chr2	388.468		msln-like.1	Chr09	10595136
AMEXTC_0340000021228_LOC108701673	chr2	388.468		msln-like.1	Chr09	10595136
AMEXTC_0340000049697_PDGFA	chr2	388.468		pdgfa	Chr09	22013213
AMEXTC_0340000218693_RPUSD1	chr2	388.468		rpusd1-like	Chr09	10570529
AMEXTC_0340000030088_SSTR5	chr2	388.468		sstr5	Chr09	11700836
AMEXTC_0340000038207_TEKT4	chr2	388.468		tekt4	Chr09	13412898
AMEXTC_0340000088056_LOC105749768	chr2	388.468		trrap-like	Chr09	20505049
AMEXTC_0340000000247_FAM20C	chr2	388.468		Xetrov90012402m	Chr04	110209451
AMEXTC_0340000187160_LMF1	chr2	388.468		Xetrov90023186m	Chr09	11408424
AMEXTC_0340000145592_hagh.L	chr2	401.621		hagh	Chr09	10880210
AMEXTC_0340000032148_thdl20.L	chr2	401.621		msln-like.1	Chr09	10595136
AMEXTC_0340000231082_NARFL	chr2	401.621		narfl	Chr09	10863035
AMEXTC_0340000058951_LOC100489456	chr2	408.298		LOC100489456	Chr09	12912869
AMEXTC_0340000163117_TSC2	chr2	408.298		LOC101733051	Chr09	13071427
AMEXTC_0340000042516_rab26	chr2	408.298		rab26	Chr09	13294193
AMEXTC_0340000003602_SYNGR3	chr2	408.298		syngr3	Chr09	12835342
AMEXTC_0340000249387_TBL3	chr2	408.298		tbl3	Chr09	11124965
AMEXTC_0340000040327_CASKIN1	chr2	410.426		caskin1	Chr09	13707635
AMEXTC_0340000205782_E4F1	chr2	410.426		e4f1	Chr09	13511641
AMEXTC_0340000165438_lcmt1	chr2	410.426		lcmt1	Chr09	14084543
AMEXTC_0340000249051_LOC101932119	chr2	410.426		LOC100494095-like	Chr09	13579408
AMEXTC_0340000156347_ZDHHC4	chr2	410.426		zdhhc4	Chr09	13506288
AMEXTC_0340000044897_GRID2IP	chr2	410.426		Xetrov90023243m	Chr09	13447606
AMEXTC_0340000036543_CACNG3	chr2	412.554		cacng3	Chr09	13766285
AMEXTC_0340000056424_OLFM2	chr2	412.554		olfm2	Chr03	125806627
AMEXTC_0340000157997_TNRC6A	chr2	412.554		tnrc6a-like	Chr09	14283558
AMEXTC_0340000130171_UBFD1	chr2	416.905		ubfd1	Chr09	16738145
AMEXTC_0340000057951_COG7	chr2	419.033		cog7	Chr09	16766714
AMEXTC_0340000002600_GGA2	chr2	419.033		gga1	Chr04	112427002
AMEXTC_0340000159650_USP31	chr2	419.033		usp31	Chr09	16894857
AMEXTC_0340000037961_hs3st2	chr2	421.138		hs3st2	Chr09	16957572
AMEXTC_0340000204201_araf.L	chr2	427.522		braf-like	scaffold_584	33703
AMEXTC_0340000209538_LOC102352461	chr2	427.522		emc3	Chr04	114265033
AMEXTC_0340000172172_LOC102365177	chr2	427.522		lrrn1-like.1	Chr04	119516322
AMEXTC_0340000042079_CFP	chr2	427.522		thbs1	Chr08	98520838
AMEXTC_0340000042079_CFP	chr2	427.522		thbs2	Chr05	40438631
AMEXTC_0340000238509_usp11	chr2	427.522		usp15	Chr03	53264316
AMEXTC_0340000022148_SYN1	chr2	427.522		Xetrov90007069m	Chr03	1542117
AMEXTC_0340000190494_cdk16	chr2	427.522		Xetrov90028025m	scaffold_316	28351
AMEXTC_0340000022287_AGR2	chr2	429.628		agr3	Chr06	44523586
AMEXTC_0340000057724_CXXC1	chr2	429.628		cxxc1	scaffold_316	186791
AMEXTC_0340000004384_LOC108788268	chr2	429.628		fam19a2-like	Chr03	53335870
AMEXTC_0340000179879_hdac6	chr2	429.628		hdac6-like	scaffold_1278	2542
AMEXTC_0340000152537_TIMM17B	chr2	429.628		timm17a	Chr02	49128374
AMEXTC_0340000172675_mbd1.S	chr2	429.628		Xetrov90028034m	scaffold_316	172984
AMEXTC_0340000010627_LOC100563653	chr2	431.756		camkv	Chr04	116126751
AMEXTC_0340000001978_LOC107112842	chr2	431.756		grm8-like	scaffold_1191	5799
AMEXTC_0340000242522_LOC101945909	chr2	436.106		cyp3a4	Chr05	81301181
AMEXTC_0340000043349_ORF2	chr2	436.106		cyp3a5	Chr06	73744779
AMEXTC_0340000036997_FTSJ1	chr2	436.106		ftsj3	scaffold_27	527019
AMEXTC_0340000043349_ORF2	chr2	436.106		LOC100487054-like	Chr06	73719507
AMEXTC_0340000154678_LOC101945909	chr2	436.106		LOC100487665-like	Chr05	81205776
AMEXTC_0340000154678_LOC101945909	chr2	436.106		LOC100494419	Chr05	81267207
AMEXTC_0340000242522_LOC101945909	chr2	436.106		LOC100494419	Chr05	81267207
AMEXTC_0340000193611_myosin	chr2	436.106		LOC100495802	Chr08	14424841
AMEXTC_0340000037808_PTPN18	chr2	436.106		LOC101730699	scaffold_2729	803
AMEXTC_0340000058397_myosin	chr2	436.106		myh2	scaffold_1690	532
AMEXTC_0340000058397_myosin	chr2	436.106		myh4	Chr08	83553980
AMEXTC_0340000058397_myosin	chr2	436.106		myh8-like	Chr08	14404437
AMEXTC_0340000041038_RBM10	chr2	436.106		rbm5	Chr04	115901697
AMEXTC_0340000228077_SDK1	chr2	436.106		sdk2	Chr10	24466811
AMEXTC_0340000126408_SLC38A5	chr2	436.106		slc38a5	Chr08	1118
AMEXTC_0340000225294_Tubulin	chr2	436.106		tuba1c	Chr02	133374196
AMEXTC_0340000084801_LOC104124785	chr2	436.106		Xetrov90026713m	scaffold_1690	11848
AMEXTC_0340000207671_IQCE	chr2	438.234		iqce	Chr09	25835316
AMEXTC_0340000043607_TTYH3	chr2	438.234		ttyh3	Chr09	25720672
AMEXTC_0340000190538_SNX8	chr2	439.383		snx8	Chr09	25193304
AMEXTC_0340000040279_ADCYAP1R1	chr2	440.34		adcyap1r1	scaffold_24	1079
AMEXTC_0340000277567_C20H16orf52	chr2	440.34		c16orf52	Chr09	18941179
AMEXTC_0340000183291_DNAH3	chr2	440.34		dnah3	Chr09	18554647
AMEXTC_0340000165042_dnah3	chr2	440.34		dnah3	Chr09	18554647
AMEXTC_0340000186949_LOC107131814	chr2	440.34		dnah3	Chr09	18554647
AMEXTC_0340000216329_LOC103583514	chr2	440.34		dnah3	Chr09	18554647
AMEXTC_0340000239110_DNAH3	chr2	440.34		dnah3	Chr09	18554647
AMEXTC_0340000193560_DNAH3	chr2	440.34		dnah3	Chr09	18554647
AMEXTC_0340000284728_LOC107591252	chr2	440.34		gars	scaffold_24	840485
AMEXTC_0340000057470_INTS1	chr2	440.34		ints1	Chr09	23868121
AMEXTC_0340000021292_LOC109306583	chr2	440.34		LOC100488360-like	scaffold_24	1158307
AMEXTC_0340000022574_CRYGN	chr2	440.34		LOC101734377	Chr06	6753915
AMEXTC_0340000219228_micall2	chr2	440.34		micall2	Chr09	23776748
AMEXTC_0340000051766_nub1	chr2	440.34		nub1	Chr06	6680593
AMEXTC_0340000017040_SELENON	chr2	440.34		sepn1	scaffold_24	421021
AMEXTC_0340000032779_UNCX	chr2	440.34		uncx	Chr09	23392661
AMEXTC_0340000293229_LOC101935204	chr2	440.34		uqcrc2	Chr09	18923667
AMEXTC_0340000008939_VILL	chr2	440.34		vill	scaffold_24	995766
AMEXTC_0340000030012_ACVR2B	chr2	442.468		acvr2a	Chr09	72087934
AMEXTC_0340000201206_CSRNP1	chr2	442.468		csrnp1	Chr06	5713310
AMEXTC_0340000153468_GORASP1	chr2	442.468		gorasp1	Chr06	5780457
AMEXTC_0340000174270_TTC21A	chr2	442.468		LOC100485767-like	Chr06	5748415
AMEXTC_0340000053672_scn5a	chr2	442.468		LOC101734293	Chr06	5888306
AMEXTC_0340000237732_WDR48	chr2	442.468		wdr48	Chr06	5799528
AMEXTC_0340000229303_GAPDH	chr2	444.596		gapdh	Chr07	1685766
AMEXTC_0340000019015_XIRP1	chr2	448.946		LOC100484998-like	Chr06	5288982
AMEXTC_0340000019005_LOC108788787	chr2	448.946		LOC100488168	Chr06	2487989
AMEXTC_0340000216245_cry-dash.L	chr2	448.946		Xetrov90027454m	scaffold_24	1242965
AMEXTC_0340000173320_BFAR	chr2	451.074		bfar	Chr09	31921307
AMEXTC_0340000012695_CIITA	chr2	451.074		ciita	Chr09	31094215
AMEXTC_0340000001089_PRKAG2	chr2	451.074		prkag1	Chr06	6788556
AMEXTC_0340000220972_RHEB	chr2	451.074		rheb	Chr06	6774932
AMEXTC_0340000157420_ZBTB47	chr2	451.074		zbtb47-like	Chr06	2597281
AMEXTC_0340000189546_Epithelial	chr2	455.418		emp2	Chr09	30997127
AMEXTC_0340000036282_GRIN2A	chr2	455.418		grin2a	Chr09	30418242
AMEXTC_0340000227209_c16orf72	chr2	462.094		c16orf72	Chr09	34718490
AMEXTC_0340000064821_GALNT11	chr2	462.094		galnt11	Chr06	7010004
AMEXTC_0340000072429_LSU	chr2	462.094		hba-l3	Chr09	37085895
AMEXTC_0340000065690_LSU	chr2	462.094		hba-l4	Chr09	37078053
AMEXTC_0340000072429_LSU	chr2	462.094		hba-l4	Chr09	37078053
AMEXTC_0340000065690_LSU	chr2	462.094		hbz	Chr09	34105898
AMEXTC_0340000017422_LOC104483667	chr2	462.094		kmt2c	Chr06	7027410
AMEXTC_0340000060286_Kmt2c	chr2	462.094		kmt2c	Chr06	7027410
AMEXTC_0340000023330_NKTR	chr2	462.094		nktr-like	Chr06	2619842
AMEXTC_0340000083011_usp7	chr2	462.094		usp7	Chr09	34762584
AMEXTC_0340000187931_cnpy1.L	chr2	466.35		cnpy1-like	Chr06	9096567
AMEXTC_0340000263310_LMBR1	chr2	466.35		lmbr1	Chr06	9548288
AMEXTC_0340000251661_nom1.L	chr2	466.35		nom1	Chr06	9640832
AMEXTC_0340000039252_UBE3C	chr2	466.35		ube3c	Chr06	9794954
AMEXTC_0340000020884_DIP2C	chr2	468.478		dip2c	Chr06	10908462
AMEXTC_0340000029300_ESYT2	chr2	468.478		esyt2-like	Chr06	11323709
AMEXTC_0340000058206_GTPBP4	chr2	468.478		gtpbp4-like	Chr05	106910352
AMEXTC_0340000159621_ncapg2	chr2	468.478		ncapg2	Chr06	10662984
AMEXTC_0340000204521_VIPR2	chr2	468.478		vipr2	Chr06	11206860
AMEXTC_0340000218047_WDR60	chr2	468.478		wdr60	Chr06	11291229
AMEXTC_0340000191638_KLF6	chr2	472.829		klf6	Chr06	12461401
AMEXTC_0340000057276_PFKP	chr2	472.829		pfkp	Chr06	12075746
AMEXTC_0340000212163_LOC101472402	chr2	472.829		pfkp	Chr06	12075746
AMEXTC_0340000011097_FZD8	chr2	474.957		fzd8	Chr06	13255731
AMEXTC_0340000014404_NRP1	chr2	474.957		nrp1	Chr06	14461984
AMEXTC_0340000248146_PARD3	chr2	474.957		pard3b	Chr09	47673729
AMEXTC_0340000029858_JCAD	chr2	477.085		kiaa1462-like	Chr06	15428912
AMEXTC_0340000057412_MAP3K8	chr2	477.085		map3k8	Chr06	15573627
AMEXTC_0340000214696_MTPAP	chr2	477.085		mtpap	Chr06	15546561
AMEXTC_0340000060000_LOC107584371	chr2	477.085		svil	Chr06	15152414
AMEXTC_0340000218689_ZNF438	chr2	477.085		znf438	Chr06	15087516
AMEXTC_0340000187921_abi1	chr2	479.213		abi1	Chr06	16683660
AMEXTC_0340000020316_armc4	chr2	479.213		armc4	Chr06	16300432
AMEXTC_0340000269280_BAMBI	chr2	479.213		bambi	Chr06	15893169
AMEXTC_0340000016330_MKX	chr2	479.213		mkx	Chr06	16410448
AMEXTC_0340000230487_MPP7	chr2	479.213		mpp7	Chr06	16060500
AMEXTC_0340000198368_PDSS1	chr2	479.213		pdss1	Chr06	16737175
AMEXTC_0340000165108_zgc:77650	chr2	483.484		arf4	scaffold_92	329374
AMEXTC_0340000136848_CALU	chr2	483.484		calu	Chr03	79530193
AMEXTC_0340000196622_DENND6B	chr2	483.484		dennd6b	Chr03	79570948
AMEXTC_0340000241592_PPP6R2	chr2	483.484		ppp6r2-like	Chr03	79599361
AMEXTC_0340000018585_LOC102945948	chr2	488.188		LOC100495411-like	Chr06	16931041
AMEXTC_0340000006572_ARHGAP21	chr2	490.316		arhgap21	Chr06	17552930
AMEXTC_0340000183708_LOC104689224	chr2	490.316		bmi1	Chr06	18539729
AMEXTC_0340000030810_KIAA1217	chr2	490.316		kiaa1217-like	Chr06	17651512
AMEXTC_0340000137806_OTUD1	chr2	490.316		otud1	Chr06	18074802
AMEXTC_0340000183319_prtfdc1.L	chr2	490.316		prtfdc1	Chr06	17440325
AMEXTC_0340000207688_PTF1A	chr2	490.316		ptf1a	Chr06	18183506
AMEXTC_0340000054698_DFNA5	chr2	491.656		dfna5	Chr06	34107073
AMEXTC_0340000146652_cbx3.S	chr2	492.423		cbx3	Chr06	33429909
AMEXTC_0340000070500_HOXA10	chr2	492.423		hoxa10	Chr06	32893871
AMEXTC_0340000070499_HoxA11	chr2	492.423		hoxa11	Chr06	32883406
AMEXTC_0340000017616_HoxA13	chr2	492.423		hoxa13	Chr06	32871331
AMEXTC_0340000060719_HOXA3	chr2	492.423		hoxa3	Chr06	32943252
AMEXTC_0340000021890_HOXA4	chr2	492.423		hoxa4	Chr06	32930323
HOXA6	chr2	492.423		hoxa6	Chr06	32916588
AMEXTC_0340000014406_HOXA7	chr2	492.423		hoxa7	Chr06	32907170
AMEXTC_0340000031158_HoxA9	chr2	492.423		hoxa9	Chr06	32901854
AMEXTC_0340000052817_SKAP2	chr2	492.423		skap2	Chr06	33087585
AMEXTC_0340000207272_SNX10	chr2	492.423		snx10	Chr06	33394034
AMEXTC_0340000138369_TAX1BP1	chr2	496.773		tax1bp1	Chr06	32525315
AMEXTC_0340000166091_CREB5	chr2	498.901		creb5-like	Chr06	31994263
AMEXTC_0340000049255_JAZF1	chr2	498.901		jazf1	Chr06	32491998
AMEXTC_0340000020334_DNAH11	chr2	505.578		dnah11-like.1	Chr06	42358023
AMEXTC_0340000019699_dnah11	chr2	505.578		dnah11-like.1	Chr06	42358023
AMEXTC_0340000017583_RAPGEF5	chr2	505.578		rapgef5-like.2	Chr06	42223055
AMEXTC_0340000192347_CTNNB1	chr2	512.254		ctnnb1	Chr06	70832104
AMEXTC_0340000032253_epidermal	chr2	512.254		egfr	Chr06	65503114
AMEXTC_0340000102609_LOC104357900	chr2	512.254		hap1	Chr10	1919847
AMEXTC_0340000218656_KIAA1143	chr2	512.254		kiaa1143	Chr06	71130219
AMEXTC_0340000019036_TRAK1	chr2	512.254		LOC101730709	Chr06	70470178
AMEXTC_0340000014822_TRAK1	chr2	512.254		LOC101730709	Chr06	70470178
AMEXTC_0340000036051_MYRIP	chr2	512.254		myrip	Chr06	63169664
AMEXTC_0340000055952_TPK1	chr2	516.605		tpk1	Chr06	65069383
AMEXTC_0340000228986_EXOSC7	chr2	518.733		exosc7	Chr06	63674675
AMEXTC_0340000055937_gpnmb	chr2	518.733		gpnmb	Chr06	34821614
AMEXTC_0340000042282_ZDHHC3	chr2	518.733		zdhhc3	Chr06	63692947
AMEXTC_0340000189869_LOC104386417	chr2	518.733		Xetrov90016282m	Chr06	63868120
AMEXTC_0340000032192_hyccin	chr2	519.626		fam126a	Chr06	35017592
AMEXTC_0340000045021_HACD1	chr2	520.839		ptpla	Chr06	20162470
AMEXTC_0340000133889_STAM	chr2	520.839		stam	Chr06	20124219
AMEXTC_0340000030169_CUBN	chr2	522.967		cubn	Chr06	20369455
AMEXTC_0340000217433_TRDMT1	chr2	522.967		trdmt1	Chr06	20345480
AMEXTC_0340000149772_GTPBP10	chr2	525.095		gtpbp10	Chr06	20883666
AMEXTC_0340000054001_FAM171A1	chr2	529.445		fam171a1	Chr06	21377351
AMEXTC_0340000023623_ITGA8	chr2	529.445		itga8	Chr06	21479429
AMEXTC_0340000146450_MINDY3	chr2	533.796		fam188a	Chr06	21619284
AMEXTC_0340000242212_CDK14	chr2	535.903		cdk14	Chr06	22671012
AMEXTC_0340000058285_STEAP4	chr2	535.903		steap4	Chr06	22511879
AMEXTC_0340000194136_AKAP9	chr2	540.231		akap9	Chr06	23231698
AMEXTC_0340000207903_mterf1	chr2	540.231		mterf1	Chr06	23212520
AMEXTC_0340000183323_ANKIB1	chr2	540.252		ankib1	Chr06	23411307
AMEXTC_0340000222745_VPS50	chr2	540.252		ccdc132-like	Chr06	23900764
AMEXTC_0340000212993_HEPACAM2	chr2	540.252		hepacam2	Chr06	23878430
AMEXTC_0340000012627_ITGB8	chr2	540.252		itgb8	Chr06	43044746
AMEXTC_0340000204892_LOC108799558	chr2	540.252		LOC100494753	Chr07	29926545
AMEXTC_0340000204892_LOC108799558	chr2	540.252		LOC101730706	Chr06	42992264
AMEXTC_0340000232555_LOC102456845	chr2	540.252		MGC147631	Chr06	24368790
AMEXTC_0340000035531_efcab1	chr2	540.252		rbm48	Chr06	23530470
AMEXTC_0340000012795_tfpi2	chr2	540.252		tfpi2	Chr06	24333768
AMEXTC_0340000216620_FERD3L	chr2	542.38		ferd3l	Chr06	43528923
AMEXTC_0340000187901_LOC100486333	chr2	542.38		LOC100486333-like	Chr08	18909118
AMEXTC_0340000053074_PDK4	chr2	542.38		pdk4	scaffold_73	349617
AMEXTC_0340000051996_LOC106702552	chr2	542.38		phactr1	Chr06	85722977
AMEXTC_0340000058967_LOC108498692	chr2	542.38		pon2	scaffold_73	300787
AMEXTC_0340000027663_PPP1R9A	chr2	542.38		ppp1r9a	scaffold_73	192812
AMEXTC_0340000210163_SNX13	chr2	542.38		snx13	Chr06	44134836
AMEXTC_0340000044826_SNX13	chr2	542.38		snx13	Chr06	44134836
AMEXTC_0340000000990_hypothetical	chr2	542.38		Xetrov90007623m	Chr03	31794688
AMEXTC_0340000000990_hypothetical	chr2	542.38		Xetrov90014539m	Chr05	106413885
AMEXTC_0340000230272_TNKS2	chr2	544.508		tnks2	Chr07	29060447
AMEXTC_0340000011741_CACNB2	chr2	546.636		cacnb2-like	Chr06	19864748
AMEXTC_0340000023242_collagen	chr2	546.636		LOC496414	Chr10	13944227
AMEXTC_0340000002373_SLC39A12	chr2	546.636		mrc1	Chr06	20023070
AMEXTC_0340000013970_ETV1	chr2	549.881		etv1	Chr06	45673995
AMEXTC_0340000024486_aryl	chr2	550.869		ahr	Chr06	44314749
AMEXTC_0340000057533_ARL4A	chr2	550.869		arl4a	Chr06	45990030
AMEXTC_0340000000009_scin	chr2	550.869		LOC100495760	Chr06	46023776
AMEXTC_0340000021315_MEOX2	chr2	550.869		meox2	Chr06	45114440
AMEXTC_0340000008768_sostdc1	chr2	550.869		sostdc1	Chr06	44746606
AMEXTC_0340000036377_SYF2	chr2	550.869		syf2	Chr06	44703764
AMEXTC_0340000039115_VWDE	chr2	550.869		vwde	Chr06	46182116
AMEXTC_0340000015593_LOC108718485	chr2	550.869		Xetrov90016060m	Chr06	45403889
AMEXTC_0340000020161_phf14.L	chr2	552.997		phf14	Chr06	46595161
AMEXTC_0340000007288_THSD7A	chr2	552.997		thsd7a	Chr06	46444579
AMEXTC_0340000027333_ERCC6L	chr2	555.125		ercc6l	Chr08	18607134
AMEXTC_0340000173879_ERCC6L	chr2	555.125		ercc6l	Chr08	18607134
AMEXTC_0340000019670_NHSL2	chr2	555.125		nhsl2-like.2	Chr08	18513303
AMEXTC_0340000060912_DBF4B	chr2	555.125		rps4x	Chr08	18470145
AMEXTC_0340000169988_SHROOM4	chr2	555.125		shroom4	Chr08	15997612
AMEXTC_0340000161358_PHKA1	chr2	555.125		Xetrov90020135m	Chr08	16561941
AMEXTC_0340000043253_KLF8	chr2	557.253		klf8	Chr08	18112801
AMEXTC_0340000038009_DGKK	chr2	557.253		LOC100496859-like	Chr08	18201622
AMEXTC_0340000189432_LOC101938311	chr2	557.253		LOC101734104	scaffold_193	292
AMEXTC_0340000033741_LOC102356032	chr2	557.253		ttc30a	Chr06	71349761
AMEXTC_0340000246382_UBA5	chr2	557.253		uba5	Chr06	71288641
AMEXTC_0340000212179_DNAJC13	chr2	559.381		dnajc13	Chr06	71621924
AMEXTC_0340000130060_TOPBP1	chr2	559.381		topbp1-like	Chr06	71585794
AMEXTC_0340000159625_ASTE1	chr2	572.646		aste1	Chr06	72236043
AMEXTC_0340000173379_ATP2C1	chr2	572.646		atp2c1	Chr06	72247559
AMEXTC_0340000155877_CMSS1	chr2	572.646		cmss1	Chr02	30726147
AMEXTC_0340000271061_mrpl3	chr2	572.646		mrpl3	Chr06	72005147
AMEXTC_0340000227002_PIK3R4	chr2	572.646		pik3r4	Chr06	72298837
AMEXTC_0340000052374_LOC101953593	chr2	572.646		Xetrov90016384m	Chr06	72325898
AMEXTC_0340000005238_LOC100486063	chr2	574.774		LOC100486063	Chr06	72442725
AMEXTC_0340000009509_capn7	chr2	580.788		capn7	Chr06	72591471
AMEXTC_0340000190435_NOD1	chr2	580.788		nod1	Chr06	72837948
AMEXTC_0340000190435_NOD1	chr2	580.788		nod1	Chr06	72837948
AMEXTC_0340000218664_CpEomesodermin	chr2	583.529		eomes	Chr06	75906649
AMEXTC_0340000142713_ngly1	chr2	583.529		ngly1-like	Chr06	76483027
AMEXTC_0340000191516_OXSM	chr2	583.529		oxsm	Chr06	76469303
AMEXTC_0340000155185_SLC4A7	chr2	583.529		Xetrov90016436m	Chr06	75975318
AMEXTC_0340000031036_RBMS3	chr2	586.678		rbms2	Chr02	135392168
AMEXTC_0340000059941_ABHD5	chr2	596.461		abhd5	Chr06	73335028
AMEXTC_0340000213596_gpd1l	chr2	596.461		gpd1l	Chr06	74131200
AMEXTC_0340000230707_TRIM71	chr2	596.461		LOC100486898-like	Chr06	73830688
AMEXTC_0340000181714_ube2e1	chr2	596.461		ube2e2-like.1	Chr06	77553089
AMEXTC_0340000233242_LOC104267732	chr2	598.589		kat2b	Chr06	78515007
AMEXTC_0340000030118_SNRK	chr2	598.589		snrk	Chr06	73144017
AMEXTC_0340000233697_thyroid	chr2	598.589		thrb	Chr06	77459361
AMEXTC_0340000035824_LOC108719958	chr2	598.589		top2b-like	Chr06	76506454
AMEXTC_0340000040189_ZNF385D	chr2	598.589		znf385b	Chr09	58385001
AMEXTC_0340000038139_PLCL2	chr2	605.068		plcl2	Chr06	79692308
AMEXTC_0340000007244_TBC1D5	chr2	605.068		tbc1d5	Chr06	79407546
AMEXTC_0340000048341_WIPF3	chr2	605.068		wipf3-like	Chr06	31562967
AMEXTC_0340000139918_LOC103768321	chr2	607.196		chn2-like	Chr06	31650479
AMEXTC_0340000032727_GLOD5	chr2	609.324		glod5	Chr01	10447866
AMEXTC_0340000044922_LOC105402702	chr2	616		ednrb2	Chr08	44124017
AMEXTC_0340000187482_NSDHL	chr2	616		nsdhl	Chr08	44278113
AMEXTC_0340000242011_FAAH2	chr2	618.128		faah2	Chr08	17211893
AMEXTC_0340000051764_TMLHE	chr2	618.128		tmlhe	Chr08	43720266
AMEXTC_0340000071824_CES4A	chr2	624.601		ces2	Chr04	19126629
AMEXTC_0340000041579_Fam13b	chr2	624.601		fam13b	Chr03	22199202
AMEXTC_0340000122225_LOC109085450	chr2	624.601		LOC101732820	scaffold_1879	6770
AMEXTC_0340000054357_LOC107120690	chr2	624.601		LOC101734394	scaffold_53	401012
AMEXTC_0340000115723_hypothetical	chr2	624.601		phactr1	Chr06	85722977
AMEXTC_0340000122225_LOC109085450	chr2	624.601		Xetrov90024563m	Chr09	79379071
AMEXTC_0340000052814_ARHGEF5	chr3	0		ngef-like	Chr05	123131367
AMEXTC_0340000057905_KEL	chr3	2.128		ece2-like	Chr05	111155583
AMEXTC_0340000125318_EPHA1	chr3	2.128		epha3	Chr02	17892615
AMEXTC_0340000165955_ZNF25	chr3	2.128		LOC100491165-like	Chr08	98050927
AMEXTC_0340000219722_PRDM9	chr3	2.128		LOC100491165-like	Chr08	98050927
AMEXTC_0340000055983_TRPV6	chr3	2.128		LOC100492412-like	scaffold_1901	893
AMEXTC_0340000156325_LOC101932790	chr3	2.128		LOC100492859	Chr10	34782108
AMEXTC_0340000119188_prodh.L	chr3	2.128		LOC100494891	Chr01	142219253
AMEXTC_0340000038804_LOC109975224	chr3	2.128		LOC101732377	Chr02	132812018
AMEXTC_0340000182249_PRSS2	chr3	2.128		prss1-like.2	scaffold_486	12872
AMEXTC_0340000123297_PRSS2	chr3	2.128		prss1-like.2	scaffold_486	12872
AMEXTC_0340000120294_LOC102565486	chr3	2.128		pzp-like.2	scaffold_130	677679
AMEXTC_0340000038804_LOC109975224	chr3	2.128		Xetrov90020060m	Chr08	13443922
AMEXTC_0340000163616_LOC102447214	chr3	2.128		Xetrov90030260m	scaffold_741	1673
AMEXTC_0340000065162_TRPV6	chr3	2.128		Xetrov90030260m	scaffold_741	1673
AMEXTC_0340000032575_LOC102507482	chr3	19.539		LOC101730261	Chr09	29735367
AMEXTC_0340000020125_LOC103801559	chr3	19.539		moxd1	Chr05	44261157
AMEXTC_0340000034470_LOC102815335	chr3	21.667		LOC100486661	scaffold_499	13865
AMEXTC_0340000250188_LOC110214108	chr3	21.667		LOC100495066-like	Chr08	43656849
AMEXTC_0340000034470_LOC102815335	chr3	21.667		LOC100495895	scaffold_7618	360
AMEXTC_0340000060287_LOC105097340	chr3	28.342		moxd1	Chr05	44261157
AMEXTC_0340000123212_LOC102568417	chr3	30.47		LOC101732585	scaffold_130	87796
AMEXTC_0340000195630_PHC1	chr3	34.705		LOC100488113-like	scaffold_130	760028
AMEXTC_0340000148291_hypothetical	chr3	39.054		cdca3-like	Chr07	1181018
AMEXTC_0340000185412_foxj2-b	chr3	39.054		foxj3	Chr07	77870605
AMEXTC_0340000030349_CLSTN3	chr3	39.054		LOC100036725	Chr07	964038
AMEXTC_0340000056891_PRDM9	chr3	39.054		LOC100486661	scaffold_499	13865
AMEXTC_0340000183887_CEP250	chr3	39.054		LOC100498193-like	Chr05	122614454
AMEXTC_0340000034804_P3H3	chr3	39.054		LOC101731913	Chr05	99819264
AMEXTC_0340000185452_phb2	chr3	39.054		phb2	Chr07	992337
AMEXTC_0340000124809_PTPN6	chr3	39.054		ptpn6	Chr07	1003744
AMEXTC_0340000017154_RIMKLB	chr3	39.054		rimklb-like	scaffold_130	52563
AMEXTC_0340000136694_triose	chr3	39.054		tpi1	Chr07	1146974
AMEXTC_0340000016316_LOC108697341	chr3	39.054		tprg1l-like.1	Chr07	1363010
AMEXTC_0340000057429_USP5	chr3	39.054		usp5	Chr07	1158013
AMEXTC_0340000034804_P3H3	chr3	39.054		Xetrov90017392m	Chr07	1340890
AMEXTC_0340000283991_LOC108705424	chr3	39.054		Xetrov90023734m	Chr09	33832749
AMEXTC_0340000232616_ENO2	chr3	41.182		eno1	Chr07	80592509
AMEXTC_0340000056702_LOC108784391	chr3	41.182		LOC733932	Chr07	1586851
AMEXTC_0340000175596_MLF2	chr3	41.182		Xetrov90017398m	Chr07	1528993
AMEXTC_0340000153013_MGC78849	chr3	41.182		Xetrov90017402m	Chr07	1621745
AMEXTC_0340000048099_CDH4	chr3	44.253		cdh2	Chr06	96017976
AMEXTC_0340000083864_cdh26.L	chr3	44.253		cdh26	Chr10	728051
AMEXTC_0340000001006_COL9A3	chr3	44.253		col9a3	scaffold_418	49828
AMEXTC_0340000010736_gata5.S	chr3	44.253		gata5	scaffold_473	55362
AMEXTC_0340000234591_GDPD5	chr3	44.253		gdpd5	Chr02	169719095
AMEXTC_0340000045598_IFFO1	chr3	44.253		iffo1-like	Chr07	1695507
AMEXTC_0340000154747_SLC17A9	chr3	44.253		LOC100496923	scaffold_2252	1117
AMEXTC_0340000200750_ZC3H18	chr3	44.253		LOC100497996	Chr04	69215409
AMEXTC_0340000240676_CHD4	chr3	44.253		LOC101733299	Chr07	1736253
AMEXTC_0340000022262_LOC108702649	chr3	44.253		LOC101735297	Chr05	135044293
AMEXTC_0340000023722_map6	chr3	44.253		map6	Chr02	169611801
AMEXTC_0340000187198_ncapd2	chr3	44.253		ncapd2	Chr07	1656845
AMEXTC_0340000163238_NOP2	chr3	44.253		nop2-like	Chr07	1724410
AMEXTC_0340000035167_st7	chr3	44.253		ogfr	scaffold_418	89349
AMEXTC_0340000029205_OSBPL2	chr3	44.253		osbpl2-like.1	Chr10	1270307
AMEXTC_0340000062072_RPS3	chr3	44.253		rps3	scaffold_195	163070
AMEXTC_0340000157891_SS18L1	chr3	44.253		ss18l1	Chr10	1146800
AMEXTC_0340000250709_SUN3	chr3	44.253		sun2	Chr04	110178167
AMEXTC_0340000043465_LOC108790326	chr3	44.253		trhr2	Chr04	69138391
AMEXTC_0340000203619_UVRAG	chr3	44.253		uvrag	Chr02	169458915
AMEXTC_0340000182796_ORF2	chr3	44.253		Xetrov90013317m	Chr05	26876687
AMEXTC_0340000020495_LAMA5	chr3	44.253		Xetrov90024626m	Chr10	1321513
AMEXTC_0340000149752_mrpl43.L	chr3	48.774		mrpl43	Chr07	21380307
AMEXTC_0340000209922_YTHDF1	chr3	54.426		ythdf1	scaffold_1290	1913
AMEXTC_0340000026064_CHRNA4	chr3	61.102		chrna2-like	Chr05	146456801
AMEXTC_0340000046901_col20a1	chr3	61.102		col14a1	Chr06	123190597
AMEXTC_0340000011473_KCNQ2	chr3	61.102		kcnq2	scaffold_709	28250
AMEXTC_0340000020961_MYT1	chr3	61.102		myt1	Chr10	624063
AMEXTC_0340000223645_PCMTD2	chr3	61.102		pcmtd2	Chr10	575954
AMEXTC_0340000030471_LOC100075357	chr3	61.102		pxdn	Chr05	130543001
AMEXTC_0340000214802_ARFRP1	chr3	65.453		LOC100490823	Chr09	70879112
AMEXTC_0340000125786_SOX18	chr3	65.453		sox18	scaffold_7992	1151
AMEXTC_0340000269341_TCEA2	chr3	65.453		tcea1	Chr06	100071542
AMEXTC_0340000236635_TNFRSF6B	chr3	65.453		tnfrsf11b	Chr06	122516077
AMEXTC_0340000024657_UCKL1	chr3	65.453		uprt-like	Chr08	26339534
AMEXTC_0340000011058_SLC2A4RG	chr3	65.453		znf704	Chr06	108909675
AMEXTC_0340000000005_ANGPT4	chr3	67.581		angpt1	Chr06	116862525
AMEXTC_0340000239954_flna	chr3	67.581		flna	Chr08	11803377
AMEXTC_0340000028695_GMEB2	chr3	67.581		gmeb1	Chr02	52625851
AMEXTC_0340000057551_TCF15	chr3	67.581		LOC101733229	scaffold_1031	11267
AMEXTC_0340000203360_HELZ2	chr3	67.581		LOC101733680	scaffold_2603	586
AMEXTC_0340000157910_LOC107108375	chr3	67.581		mfsd2a	Chr02	86727590
AMEXTC_0340000264745_LOC101361888	chr3	67.581		pdik1l	Chr02	51099186
AMEXTC_0340000281123_MGC52622	chr3	67.581		sdcbp	Chr06	101510097
AMEXTC_0340000164139_SNPH	chr3	67.581		sybu	Chr06	120175494
AMEXTC_0340000057551_TCF15	chr3	67.581		tcf15	scaffold_9005	1617
AMEXTC_0340000060585_TRIB3	chr3	67.581		trib2	Chr05	135591053
AMEXTC_0340000274041_LOC102377907	chr3	71.837		asxl3	Chr06	97504400
AMEXTC_0340000149518_cox4i2	chr3	71.837		cox4i1	Chr04	67252043
AMEXTC_0340000063074_LOC106861640	chr3	71.837		irf4	Chr06	51194388
AMEXTC_0340000029024_HCK	chr3	71.837		lck	Chr02	82305654
AMEXTC_0340000232604_mapre1.L	chr3	71.837		mapre1	scaffold_284	106468
AMEXTC_0340000284734_TM9SF4	chr3	71.837		tm9sf4	scaffold_284	901
AMEXTC_0340000174199_tpx2.S	chr3	71.837		tpx2	scaffold_4312	1113
AMEXTC_0340000056059_LOC103048898	chr3	71.837		ttll1-like	scaffold_554	65985
AMEXTC_0340000027108_XKR7	chr3	71.837		xkr4	Chr06	100561881
AMEXTC_0340000033811_MYLK2	chr3	71.837		Xetrov90010712m	Chr04	25092171
AMEXTC_0340000269321_LOC108702639	chr3	72.773		LOC100495442	scaffold_387	96044
AMEXTC_0340000009821_PHACTR3	chr3	72.773		phactr3	Chr10	839054
AMEXTC_0340000227201_prelid3b.S	chr3	72.773		slmo1	Chr06	88537416
AMEXTC_0340000202474_LOC101945969	chr3	76.071		ppp4r1l	scaffold_249	131927
AMEXTC_0340000017599_SAMSN1	chr3	81.648		samsn1	Chr02	22431665
AMEXTC_0340000013969_LOC108794146	chr3	81.648		Xetrov90004183m	Chr02	22324793
AMEXTC_0340000002203_phosphoenolpyruvate	chr3	84.701		pck1	Chr10	49199
AMEXTC_0340000055515_PCK1	chr3	84.701		pck1	Chr10	49199
AMEXTC_0340000260407_AURKA	chr3	91.39		aurka	scaffold_113	346610
AMEXTC_0340000032201_CASS4	chr3	91.39		cass4	scaffold_113	290228
AMEXTC_0340000175612_ZFP64	chr3	109.105		zfp64	Chr10	26876579
AMEXTC_0340000101291_DUOX2	chr3	110.52		duox1	Chr03	86020047
AMEXTC_0340000101291_DUOX2	chr3	110.52		duox2	Chr03	85920577
AMEXTC_0340000142942_DUOXA2	chr3	110.52		duoxa1	Chr03	85993520
AMEXTC_0340000142942_DUOXA2	chr3	110.52		LOC101733132	Chr03	85964111
AMEXTC_0340000034102_AP3B2	chr3	110.52		LOC101733860	Chr03	85134620
AMEXTC_0340000294788_RBPMS2	chr3	110.52		rbpms2	Chr03	85228279
AMEXTC_0340000016043_SNAI1	chr3	110.52		snai2	Chr06	98690163
AMEXTC_0340000027854_ADNP	chr3	111.213		adnp	Chr10	27456660
AMEXTC_0340000131931_DDX27	chr3	111.213		ddx27	Chr03	131222064
AMEXTC_0340000023818_dpm1	chr3	111.213		dpm1	Chr10	27426856
AMEXTC_0340000221379_SLC35C2	chr3	111.213		slc35c2	Chr10	14366354
AMEXTC_0340000036383_SNX21	chr3	111.213		snx21	Chr10	16499996
AMEXTC_0340000159635_ZNFX1	chr3	111.213		znfx1	Chr10	14430929
AMEXTC_0340000029511_RIPOR3	chr3	111.213		Xetrov90025263m	Chr10	27612494
AMEXTC_0340000231160_ZSWIM3	chr3	113.351		zswim3	Chr10	16483405
AMEXTC_0340000269338_CTSA	chr3	115.49		ctsa	Chr10	16447847
AMEXTC_0340000064886_LOC104267936	chr3	115.49		LOC100498415	Chr10	14622177
AMEXTC_0340000054019_PCIF1	chr3	115.49		pcif1	Chr10	16388005
AMEXTC_0340000186865_PLTP	chr3	115.49		pltp	Chr10	16426295
AMEXTC_0340000062861_LOC102446471	chr3	115.49		tgm3	Chr10	14592360
AMEXTC_0340000291966_LOC103278197	chr3	115.49		Xetrov90016206m	Chr06	57636681
AMEXTC_0340000060944_KCNB1	chr3	115.49		Xetrov90025314m	Chr10	29936557
AMEXTC_0340000038326_ARFGEF2	chr3	117.618		arfgef2-like	Chr10	29776570
AMEXTC_0340000150588_brefeldin	chr3	117.618		cse1l	Chr10	29826243
AMEXTC_0340000024554_LOC109615404	chr3	117.618		Xetrov90024563m	Chr09	79379071
AMEXTC_0340000005608_PREX1	chr3	119.757		prex1	Chr10	28541791
AMEXTC_0340000228353_NCOA3	chr3	124.119		ncoa3	Chr10	28908839
AMEXTC_0340000005605_SULF2	chr3	124.119		sulf2	Chr10	28835463
AMEXTC_0340000213479_tp53rk	chr3	126.247		tp53rk	Chr10	29411151
AMEXTC_0340000171202_SLC13A3	chr3	126.247		Xetrov90024872m	Chr10	9132195
AMEXTC_0340000057559_ada	chr3	130.503		ada.2	Chr10	29647606
AMEXTC_0340000279838_R3HDML	chr3	130.503		r3hdml	Chr10	30233967
AMEXTC_0340000155251_SERINC3	chr3	130.503		serinc3	Chr10	30125709
AMEXTC_0340000042820_Ttpal	chr3	130.503		ttpal	Chr10	30136228
AMEXTC_0340000044428_rims4	chr3	132.631		rims4-like	Chr10	5388535
AMEXTC_0340000180240_ywhab.L	chr3	132.631		ywhab	Chr10	5528168
AMEXTC_0340000135263_NCOA5	chr3	134.759		ncoa5	Chr10	16131632
AMEXTC_0340000016556_ABLIM3	chr3	139.109		ablim3	Chr03	31523632
AMEXTC_0340000145151_matrix	chr3	139.109		mmp9	Chr10	16285602
AMEXTC_0340000170674_SH3PXD2B	chr3	139.109		sh3pxd2b	Chr03	30631744
AMEXTC_0340000019964_SLC12A5	chr3	139.109		slc12a5	Chr10	16189364
AMEXTC_0340000262767_STK10	chr3	139.109		stk10	Chr03	30745446
AMEXTC_0340000275185_UBTD2	chr3	139.109		ubtd2	Chr03	30816240
AMEXTC_0340000035141_ZNF335	chr3	139.109		znf335-like	Chr10	16337575
AMEXTC_0340000240698_GRPEL2	chr3	141.237		grpel2	Chr03	31736538
AMEXTC_0340000203925_ARHGEF37	chr3	143.365		arhgef37	Chr03	34320607
AMEXTC_0340000025100_PCYOX1L	chr3	143.365		pcyox1l	Chr03	31765034
AMEXTC_0340000023797_PPARGC1B	chr3	143.365		ppargc1b-like	Chr03	34461853
AMEXTC_0340000162989_FBXO38	chr3	145.493		Xetrov90007666m	Chr03	35009236
AMEXTC_0340000161133_arl10	chr3	147.599		arl10	Chr03	36004791
AMEXTC_0340000227008_LOC108710984	chr3	147.599		eif4e-like.1	Chr03	37833720
AMEXTC_0340000260730_faf2	chr3	147.599		faf2	Chr03	38076078
AMEXTC_0340000066756_faf2	chr3	147.599		faf2	Chr03	38076078
AMEXTC_0340000157778_KIAA1191	chr3	147.599		kiaa1191	Chr03	35942839
AMEXTC_0340000012101_LOC108713229	chr3	147.599		LOC100485269	Chr03	112449968
AMEXTC_0340000002543_GPRIN1	chr3	147.599		LOC100491955	Chr03	37913979
AMEXTC_0340000217837_RNF44	chr3	147.599		rnf44	Chr03	38049234
AMEXTC_0340000152563_tspan17	chr3	147.599		tspan17	Chr03	37787713
AMEXTC_0340000030234_LOC109141183	chr3	147.599		unc5a	Chr03	37141065
AMEXTC_0340000168358_SIMC1	chr3	147.599		Xetrov90007689m	Chr03	35939144
AMEXTC_0340000007075_dbn1	chr3	149.727		dbn1	Chr03	36416781
AMEXTC_0340000213569_Protein	chr3	149.727		ddx41	Chr03	36612533
AMEXTC_0340000204004_FAM193B	chr3	149.727		fam193b	Chr03	36629580
AMEXTC_0340000227058_LOC104514387	chr3	149.727		nsd1-like	Chr03	36753104
AMEXTC_0340000053998_UIMC1	chr3	149.727		uimc1	Chr03	36984677
AMEXTC_0340000025033_F12	chr3	154.077		f12	Chr03	36288198
AMEXTC_0340000012733_LOC102946027	chr3	154.077		gfra3	Chr03	38475254
AMEXTC_0340000291925_LOC100487104	chr3	154.077		LOC100487104-like	Chr03	38537096
AMEXTC_0340000021198_LOC108710991	chr3	154.077		LOC100490316	Chr03	38237312
AMEXTC_0340000135342_Rab11	chr3	154.077		rab11fip5	Chr01	10562061
AMEXTC_0340000030679_SLC34A1	chr3	154.077		slc34a2	scaffold_69	696363
AMEXTC_0340000164275_TMED9	chr3	154.077		tmed9	Chr03	38164425
AMEXTC_0340000055353_LOC109915294	chr3	154.077		Xetrov90007767m	Chr03	38353746
AMEXTC_0340000024491_SEPT1	chr3	156.205		43348	Chr01	145941070
AMEXTC_0340000036127_ARMC5	chr3	156.205		armc5	Chr09	8300240
AMEXTC_0340000141634_PHKG2	chr3	156.205		phkg1	Chr02	94190300
AMEXTC_0340000020073_pisd	chr3	156.205		pisd-like.1	Chr01	143615120
AMEXTC_0340000135701_RNF25	chr3	156.205		rnf25-like	Chr09	8246066
AMEXTC_0340000241259_RNF40	chr3	156.205		rnf40-like	Chr09	8030703
AMEXTC_0340000024100_SRCAP	chr3	156.205		srcap	Chr09	8084401
AMEXTC_0340000221061_STK36	chr3	156.205		stk36	Chr09	8229887
AMEXTC_0340000003337_ITGAL	chr3	156.205		Xetrov90022937m	Chr09	6748856
AMEXTC_0340000163928_adora2ab	chr3	158.333		adora2b	Chr02	31249885
AMEXTC_0340000045746_LOC102565955	chr3	158.333		glipr1l1	Chr03	51640394
AMEXTC_0340000005632_LOC110090062	chr3	158.333		itgax	Chr09	6797971
AMEXTC_0340000010200_PAQR4	chr3	158.333		paqr4-like	Chr09	7119800
AMEXTC_0340000058337_PELO	chr3	158.333		pelo	Chr09	7083934
AMEXTC_0340000213579_LOC108701723	chr3	158.333		specc1l	Chr01	143988432
AMEXTC_0340000001373_LOC102351091	chr3	160.461		itgax	Chr09	6797971
AMEXTC_0340000188993_LOC101936084	chr3	160.461		LOC100493030	scaffold_1125	2951
AMEXTC_0340000179375_thoc6	chr3	160.461		LOC100498236	Chr09	6931057
AMEXTC_0340000008916_LOC107197025	chr3	160.461		LOC101732377	Chr02	132812018
AMEXTC_0340000015746_MMP25	chr3	160.461		mmp17	Chr01	148212735
AMEXTC_0340000287856_LOC101939168	chr3	160.461		Xetrov90022650m	Chr09	1994191
AMEXTC_0340000062698_tep1	chr3	162.589		LOC100485265	Chr01	131046486
AMEXTC_0340000118553_CAVIN2	chr3	162.589		LOC100495531	Chr09	43112382
AMEXTC_0340000006266_ppil3.S	chr3	162.589		ppil3	Chr09	3143459
AMEXTC_0340000004689_TTC5	chr3	162.589		ttc5	Chr01	130450222
AMEXTC_0340000290762_GSS	chr3	166.845		gss	Chr10	34611770
AMEXTC_0340000277564_LOC108799995	chr3	166.845		LOC100135243	Chr07	96893410
AMEXTC_0340000030049_LOC108799005	chr3	166.845		LOC100495333	Chr09	6642093
AMEXTC_0340000118949_LOC108799005	chr3	166.845		LOC100496022	Chr09	2990922
AMEXTC_0340000030049_LOC108799005	chr3	166.845		LOC100496022	Chr09	2990922
AMEXTC_0340000051194_LOC108802072	chr3	166.845		LOC101731153	Chr05	143074895
AMEXTC_0340000219026_LOC108802072	chr3	166.845		LOC101731153	Chr05	143074895
AMEXTC_0340000018892_LOC100352411	chr3	166.845		LOC101732550-like	scaffold_211	112468
AMEXTC_0340000030049_LOC108799005	chr3	166.845		LOC548809	Chr09	2930646
AMEXTC_0340000277564_LOC108799995	chr3	166.845		sbk1	Chr07	95496307
AMEXTC_0340000026456_LOC102365082	chr3	166.845		sbk1	Chr07	95496307
AMEXTC_0340000051194_LOC108802072	chr3	166.845		xnf7-b	Chr09	1827864
AMEXTC_0340000030049_LOC108799005	chr3	166.845		Xetrov90022686m	Chr09	2830964
AMEXTC_0340000131777_znf646	chr3	171.196		LOC100487119	scaffold_288	71502
AMEXTC_0340000016288_MFAP4	chr3	171.196		LOC100488329	Chr09	2303739
AMEXTC_0340000016288_MFAP4	chr3	171.196		LOC100488644	Chr09	2309254
AMEXTC_0340000064479_LOC102692872	chr3	171.196		LOC100489175	scaffold_193	359130
AMEXTC_0340000064479_LOC102692872	chr3	171.196		LOC100492973	Chr09	1221934
AMEXTC_0340000216647_LOC109641883	chr3	171.196		LOC100494126	Chr09	2677749
AMEXTC_0340000216647_LOC109641883	chr3	171.196		LOC100494289	Chr09	2697966
AMEXTC_0340000216647_LOC109641883	chr3	171.196		LOC100495333	Chr09	6642093
AMEXTC_0340000227208_hypothetical	chr3	171.196		LOC101731153	Chr05	143074895
AMEXTC_0340000003202_hypothetical	chr3	171.196		LOC101731436	scaffold_3119	588
AMEXTC_0340000064479_LOC102692872	chr3	171.196		LOC101732506	scaffold_193	339918
AMEXTC_0340000001812_LOC102365546	chr3	171.196		LOC101732838	scaffold_193	275223
AMEXTC_0340000277519_MAPK7	chr3	171.196		mapk7	Chr09	2268853
AMEXTC_0340000049754_LOC104258025	chr3	171.196		moxd1	Chr05	44261157
AMEXTC_0340000064479_LOC102692872	chr3	171.196		prf1	scaffold_193	369497
AMEXTC_0340000003202_hypothetical	chr3	171.196		Xetrov90022661m	Chr09	2281333
AMEXTC_0340000216647_LOC109641883	chr3	171.196		Xetrov90022684m	Chr09	2785148
AMEXTC_0340000269305_fructose-bisphosphate	chr3	173.324		aldoc	Chr02	27040961
AMEXTC_0340000273782_CDIPT	chr3	173.324		cdipt	scaffold_211	115277
AMEXTC_0340000209934_hirip3.L	chr3	173.324		hirip3	scaffold_211	220947
AMEXTC_0340000284695_LOC100145486	chr3	173.324		LOC100145486	scaffold_211	169990
AMEXTC_0340000235555_FBXL19	chr3	173.324		LOC100486811-like	Chr09	1751247
AMEXTC_0340000044044_trim72.L	chr3	173.324		LOC100498595	scaffold_2195	5650
AMEXTC_0340000140651_mvp.L	chr3	173.324		mvp	scaffold_472	98
AMEXTC_0340000010941_DOC2A	chr3	173.324		rph3a	Chr01	155380339
AMEXTC_0340000216423_taok2	chr3	173.324		taok1	Chr02	25321670
AMEXTC_0340000209764_taok2	chr3	173.324		taok2	scaffold_211	133792
AMEXTC_0340000044044_trim72.L	chr3	173.324		trim72	Chr02	143408353
AMEXTC_0340000224715_ZG16	chr3	173.324		zg16	scaffold_1820	14734
AMEXTC_0340000034585_sez6l2.S	chr3	173.324		Xetrov90027175m	scaffold_211	190390
AMEXTC_0340000015153_LOC106606887	chr3	182.44		cldn3	Chr02	38130278
AMEXTC_0340000181002_cln3.L	chr3	182.44		cln3-like	scaffold_318	151386
AMEXTC_0340000122576_CORO1A	chr3	182.44		coro1c	Chr01	137954841
AMEXTC_0340000256782_LOC102357651	chr3	182.44		LOC100493528	scaffold_783	87013
AMEXTC_0340000014367_LOC102355250	chr3	182.44		slx1a	scaffold_1597	7456
AMEXTC_0340000028929_ACSS2	chr3	184.568		acss2-like	Chr10	34629979
AMEXTC_0340000036120_CHD6	chr3	184.568		chd6-like	Chr10	33835546
AMEXTC_0340000119404_prodh2	chr3	184.568		LOC100494891	Chr01	142219253
AMEXTC_0340000059450_LOC108802258	chr3	184.568		LOC101732515	scaffold_1485	10246
AMEXTC_0340000224949_RALGAPB	chr3	184.568		ralgapb-like	Chr10	33748302
AMEXTC_0340000038803_RBL1	chr3	184.568		rbl1	Chr10	33877655
AMEXTC_0340000244529_SOGA1	chr3	184.568		soga1-like	Chr10	34691115
AMEXTC_0340000061007_CBFA2T2	chr3	186.696		cbfa2t2	Chr10	33362706
AMEXTC_0340000137599_E2F1	chr3	186.696		e2f1	Chr10	33245209
AMEXTC_0340000050697_MGC52578	chr3	186.696		hmgb2	Chr01	39547683
AMEXTC_0340000214834_LOC100497060	chr3	186.696		LOC100497060	Chr04	118088856
AMEXTC_0340000250203_PIGT	chr3	186.696		pigt	Chr10	33399457
AMEXTC_0340000013803_SH2B1	chr3	186.696		sh2b2	Chr02	41888815
AMEXTC_0340000269308_EIF2S2	chr3	186.696		Xetrov90025423m	Chr10	32912175
AMEXTC_0340000060463_TUFM	chr3	186.696		Xetrov90029597m	scaffold_5650	995
AMEXTC_0340000056612_LOC102363628	chr3	188.824		LOC100492840-like	Chr10	5628700
AMEXTC_0340000062286_srsf3	chr3	188.824		srsf3	Chr02	67970781
AMEXTC_0340000053082_LOC108803096	chr3	197.43		fam83b	Chr05	88133309
AMEXTC_0340000053082_LOC108803096	chr3	197.43		fam83c	Chr10	6181365
AMEXTC_0340000005426_LOC100489773	chr3	197.43		LOC100489773-like	Chr10	34093698
AMEXTC_0340000027019_Fer-1-like	chr3	197.43		LOC101730754	Chr10	34169479
AMEXTC_0340000029737_MMP24	chr3	197.43		mmp24	Chr10	34853406
AMEXTC_0340000235130_LOC108785080	chr3	197.43		mtss1.1	scaffold_81	148657
AMEXTC_0340000139851_NFS1	chr3	197.43		nfs1	Chr10	34283194
AMEXTC_0340000034551_RBM12	chr3	197.43		rbm12	Chr10	34269752
AMEXTC_0340000017215_RBM39	chr3	197.43		rbm39	Chr10	34307732
AMEXTC_0340000064717_ahcy	chr3	201.686		ahcy	Chr10	32802030
AMEXTC_0340000054499_GGT7	chr3	201.686		ggt7	Chr10	32622386
AMEXTC_0340000088973_Itch	chr3	201.686		itch	Chr10	32764004
AMEXTC_0340000056793_myh7b	chr3	201.686		myh7b	Chr10	34535679
AMEXTC_0340000200865_TRPC4AP	chr3	201.686		trpc4ap	Chr10	34496073
AMEXTC_0340000088973_Itch	chr3	201.686		wwp1	Chr06	110569123
AMEXTC_0340000053602_ZHX3	chr3	201.686		zhx3	Chr10	32591983
AMEXTC_0340000044560_PLCG1	chr3	201.686		Xetrov90025406m	Chr10	32542531
AMEXTC_0340000005818_MAFB	chr3	203.814		mafb	Chr10	32391302
AMEXTC_0340000055039_DHX35	chr3	205.942		dhx35	Chr10	31959493
AMEXTC_0340000215368_FAM83D	chr3	205.942		LOC100496367	Chr10	31946751
AMEXTC_0340000227258_LPIN3	chr3	205.942		lpin2	Chr06	92017846
AMEXTC_0340000061259_myosin	chr3	205.942		myl9	Chr10	31239706
AMEXTC_0340000002848_TGIF2	chr3	205.942		tgif2	Chr10	31255449
AMEXTC_0340000186929_Band	chr3	210.293		aar2	Chr10	31400396
AMEXTC_0340000216239_DLGAP4	chr3	210.293		dlgap4	Chr10	31275315
AMEXTC_0340000018204_EPB41L1	chr3	210.293		Xetrov90025381m	Chr10	31407110
AMEXTC_0340000169343_SRC	chr3	214.549		src	Chr10	31082179
AMEXTC_0340000003097_BPI	chr3	216.677		MGC108117	Chr10	30839831
AMEXTC_0340000266283_BNIP1	chr3	218.805		bnip1	Chr03	33951927
AMEXTC_0340000225425_CDK5RAP1	chr3	218.805		cdk5rap1	Chr10	17311611
AMEXTC_0340000200734_CREBRF	chr3	218.805		crebrf-like	Chr03	33971278
AMEXTC_0340000008536_DRD1	chr3	218.805		drd1	Chr03	32643827
AMEXTC_0340000002043_Janus	chr3	218.805		jakmip2	Chr03	34073348
AMEXTC_0340000011413_hypothetical	chr3	218.805		LOC100485776	Chr10	14946361
AMEXTC_0340000022797_bpifb2	chr3	218.805		LOC101734633	Chr10	16918626
AMEXTC_0340000067092_Msx2	chr3	218.805		msx2	Chr03	33076668
AMEXTC_0340000041151_dpysl3	chr3	225.481		dpysl3	Chr03	34136739
AMEXTC_0340000020594_gpr151	chr3	225.481		gpr151	Chr03	30552964
AMEXTC_0340000269344_lars	chr3	225.481		lars	Chr03	30353727
AMEXTC_0340000035220_PPP2R2B	chr3	225.481		ppp2r2b	Chr03	32050129
AMEXTC_0340000225273_RBM27	chr3	225.481		rbm27	Chr03	30400683
AMEXTC_0340000175801_YIPF5	chr3	227.609		yipf5	Chr03	29468437
AMEXTC_0340000277506_GDF9	chr3	229.737		gdf9	Chr03	28400241
AMEXTC_0340000054260_gnpda1	chr3	229.737		gnpda1	Chr03	28233195
AMEXTC_0340000017831_CCNI2	chr3	229.737		LOC100125081	Chr03	28579692
AMEXTC_0340000026893_RNF14	chr3	229.737		LOC100485226	Chr03	28224356
AMEXTC_0340000026893_RNF14	chr3	229.737		LOC101731999	Chr03	28183533
AMEXTC_0340000217021_SHROOM1	chr3	229.737		shroom1	Chr03	28423657
AMEXTC_0340000160319_P4HA2	chr3	229.737		Xetrov90007542m	Chr03	27463505
AMEXTC_0340000007438_ACSL6	chr3	234.077		acsl6	Chr03	26869780
AMEXTC_0340000008755_FNIP1	chr3	234.077		fnip1-like	Chr03	26781330
AMEXTC_0340000203938_RAPGEF6	chr3	234.077		rapgef6	Chr03	7979767
AMEXTC_0340000165954_slc22a4	chr3	234.077		slc22a5	Chr03	27219925
AMEXTC_0340000045294_FSTL4	chr3	236.215		fstl4	Chr03	4813983
AMEXTC_0340000180242_LOC103182116	chr3	244.853		skp1	Chr03	17507956
AMEXTC_0340000135001_VDAC1	chr3	244.853		vdac1	Chr03	4754567
AMEXTC_0340000062610_C13H5orf24	chr3	244.999		c5orf24	Chr03	17089485
AMEXTC_0340000182946_DDX46	chr3	244.999		ddx46-like	Chr03	17120027
AMEXTC_0340000010232_SEC24A	chr3	244.999		sec24a-like	Chr03	17168755
AMEXTC_0340000036878_SLC25A48	chr3	247.127		slc25a48	Chr03	16141952
AMEXTC_0340000028805_LOC102353340	chr3	253.581		bicc1	Chr07	7611027
AMEXTC_0340000012034_PHYKPL	chr3	253.581		etnppl	Chr01	57862643
AMEXTC_0340000028470_hnrnpab	chr3	253.581		hnrnpab	Chr03	21930410
AMEXTC_0340000130620_nme5.L	chr3	253.581		nme5	Chr03	22271480
AMEXTC_0340000027855_SPOCK1	chr3	253.581		spock3	Chr01	41555975
AMEXTC_0340000082151_LOC107284146	chr3	255.709		ankrd17	scaffold_51	499953
AMEXTC_0340000021943_LOC109310132	chr3	255.709		arhgap24-like	Chr01	93254503
AMEXTC_0340000041346_Gfpt2	chr3	255.709		gfpt2	Chr03	22149105
AMEXTC_0340000003320_grin2b	chr3	255.709		grin2b	Chr04	104210840
AMEXTC_0340000289365_FAM234B	chr3	255.709		kiaa1467	Chr04	104061121
AMEXTC_0340000019570_LOC109293765	chr3	255.709		LOC100145174	Chr07	64206180
AMEXTC_0340000015408_LOC101732199	chr3	255.709		LOC100145473	Chr01	137860739
AMEXTC_0340000015408_LOC101732199	chr3	255.709		LOC100491909	Chr05	4603608
AMEXTC_0340000039971_LOC102162486	chr3	255.709		luc7l2	Chr04	105195228
AMEXTC_0340000157743_LOC101340311	chr3	255.709		matr3	Chr03	21858680
AMEXTC_0340000023734_LOC109293765	chr3	255.709		nnmt-like.1	Chr07	73825146
AMEXTC_0340000017118_PURA	chr3	255.709		pura	Chr03	21904026
AMEXTC_0340000034621_RUFY1	chr3	255.709		rufy1	Chr03	22523135
AMEXTC_0340000196577_TTC26	chr3	255.709		ttc26	Chr04	104787501
AMEXTC_0340000046236_UBN2	chr3	255.709		ubn2	Chr04	104819166
AMEXTC_0340000214627_LOC102462176	chr3	257.837		LOC101731511-like	Chr04	109858946
AMEXTC_0340000067996_LOC102462176	chr3	259.965		Xetrov90012386m	Chr04	109890106
AMEXTC_0340000174786_aco2.L	chr3	262.093		aco2	Chr04	109970271
AMEXTC_0340000190420_Fam83f	chr3	262.093		fam83f	Chr04	111250710
AMEXTC_0340000215919_LOC102573705	chr3	262.093		LOC100488097	Chr04	111425096
AMEXTC_0340000048819_PMM1	chr3	262.093		pmm2	Chr04	104014979
AMEXTC_0340000214934_SGSM3	chr3	262.093		sgsm3	Chr04	111398444
[truncated: 5,863 more rows]
