# Supplementary material for: A chromosome-scale assembly of the axolotl genome
Source: HighWire-hosted journal article supplement (doi:10.1101/gr.241901.118), 2019-01-24
Supplement: Supplemental_Table_5.xlsx [file Supplemental_Table_5.xlsx]

## Sheet: Sheet1
Supplementary Table 5 - an axolotl / chicken comparative map.
A. mexicanum				Chicken galGal4
gene	chromosome	Position (cM)		gene	chromosome	start position
AMEXTC_0340000060302_ZNF282	chr1	0		ENSGALT00000021794.4	chrLGE22C19W28	122074
AMEXTC_0340000178868_LOC107737464	chr1	0		ENSGALT00000007818.4	chr2	494402
AMEXTC_0340000056697_LOC102259710	chr1	0		ENSGALT00000021139.3	chr1	60057409
AMEXTC_0340000056697_LOC102259710	chr1	0		ENSGALT00000021794.4	chrLGE22C19W28	122074
AMEXTC_0340000290800_pcolce.L	chr1	2.128		ENSGALT00000004131.3	chr9	10041007
AMEXTC_0340000053817_nucleotide-binding	chr1	2.128		ENSGALT00000005804.4	chr21	4260523
AMEXTC_0340000013990_nucleotide-binding	chr1	2.128		ENSGALT00000005804.4	chr21	4260523
AMEXTC_0340000147962_BIRC7	chr1	2.128		ENSGALT00000013836.3	chr4	15615491
AMEXTC_0340000058019_nucleotide-binding	chr1	2.128		ENSGALT00000005804.4	chr21	4260523
AMEXTC_0340000277558_nucleotide-binding	chr1	2.128		ENSGALT00000005804.4	chr21	4260523
AMEXTC_0340000016453_LOC107118174	chr1	2.128		ENSGALT00000027300.3	chr1	145184465
AMEXTC_0340000064191_LOC110322417	chr1	2.128		ENSGALT00000021794.4	chrLGE22C19W28	122074
AMEXTC_0340000161279_Zfp982	chr1	2.128		ENSGALT00000037547.1	chr1	60058081
AMEXTC_0340000161279_Zfp982	chr1	2.128		ENSGALT00000021139.3	chr1	60057409
AMEXTC_0340000161279_Zfp982	chr1	2.128		ENSGALT00000021794.4	chrLGE22C19W28	122074
AMEXTC_0340000161279_Zfp982	chr1	2.128		ENSGALT00000046188.1	chrUn	269
AMEXTC_0340000161279_Zfp982	chr1	2.128		ENSGALT00000046188.1	chrUn	269
AMEXTC_0340000190645_LOC102376062	chr1	2.128		ENSGALT00000046168.1	chrUn	5828
AMEXTC_0340000179149_LOC101944500	chr1	2.128		ENSGALT00000040211.2	chr18	15431
AMEXTC_0340000179149_LOC101944500	chr1	2.128		ENSGALT00000021794.4	chrLGE22C19W28	122074
AMEXTC_0340000179149_LOC101944500	chr1	2.128		ENSGALT00000046188.1	chrUn	269
AMEXTC_0340000179149_LOC101944500	chr1	2.128		ENSGALT00000046188.1	chrUn	269
AMEXTC_0340000179149_LOC101944500	chr1	2.128		ENSGALT00000046188.1	chrUn	269
AMEXTC_0340000190639_LOC100619372	chr1	2.128		ENSGALT00000000466.4	chrUn	4173
AMEXTC_0340000196330_LOC105750141	chr1	2.128		ENSGALT00000040211.2	chr18	15431
AMEXTC_0340000196330_LOC105750141	chr1	2.128		ENSGALT00000046168.1	chrUn	5828
AMEXTC_0340000196330_LOC105750141	chr1	2.128		ENSGALT00000046188.1	chrUn	269
AMEXTC_0340000196330_LOC105750141	chr1	2.128		ENSGALT00000021794.4	chrLGE22C19W28	122074
AMEXTC_0340000196330_LOC105750141	chr1	2.128		ENSGALT00000029406.3	chr2	350395
AMEXTC_0340000256979_dnaJ-like	chr1	4.255		ENSGALT00000003982.4	chr13	1788283
AMEXTC_0340000003970_EPHB4	chr1	4.255		ENSGALT00000010668.4	chr9	3230462
AMEXTC_0340000136241_pld2	chr1	4.255		ENSGALT00000015057.6	chr9	18987371
AMEXTC_0340000211426_LOC101396116	chr1	4.255		ENSGALT00000015126.4	chr9	19060652
AMEXTC_0340000211426_LOC101396116	chr1	4.255		ENSGALT00000008104.4	chr1	132936572
AMEXTC_0340000018095_LOC109918324	chr1	4.255		ENSGALT00000045319.1	chr5	20863829
AMEXTC_0340000200405_eif4e2rs1	chr1	4.255		ENSGALT00000012860.4	chr9	15087460
AMEXTC_0340000062409_CHRNE	chr1	4.255		ENSGALT00000012833.3	chr9	15080136
AMEXTC_0340000005610_hypothetical	chr1	4.255		ENSGALT00000044012.1	chr28	782330
AMEXTC_0340000005610_hypothetical	chr1	4.255		ENSGALT00000045918.1	chr28	782333
AMEXTC_0340000230061_SLC25A11	chr1	4.255		ENSGALT00000032427.3	chr4	1536609
AMEXTC_0340000187406_SENP3	chr1	4.255		ENSGALT00000013921.3	chr9	15536604
AMEXTC_0340000275208_LOC109916070	chr1	4.255		ENSGALT00000011685.4	chr9	12741368
AMEXTC_0340000006529_LOC108799996	chr1	4.255		ENSGALT00000022935.3	chr14	12938586
AMEXTC_0340000024401_CD68	chr1	4.255		ENSGALT00000027170.4	chr1	136831178
AMEXTC_0340000056824_LOC102694791	chr1	8.606		ENSGALT00000011008.4	chr9	11035308
AMEXTC_0340000181135_LOC108711825	chr1	8.606		ENSGALT00000011010.3	chr9	11061795
AMEXTC_0340000131485_CHRNB1	chr1	8.606		ENSGALT00000012833.3	chr9	15080136
AMEXTC_0340000131485_CHRNB1	chr1	8.606		ENSGALT00000039804.2	chr10	3103511
AMEXTC_0340000016669_sat2	chr1	8.606		ENSGALT00000036635.2	chr1	117759375
AMEXTC_0340000180359_LOC109993265	chr1	8.606		ENSGALT00000036635.2	chr1	117759375
AMEXTC_0340000028312_LOC102364374	chr1	10.734		ENSGALT00000011460.3	chr9	12339537
AMEXTC_0340000277490_LOC107118085	chr1	10.734		ENSGALT00000014520.3	chr9	17020758
AMEXTC_0340000031514_TFR2	chr1	10.734		ENSGALT00000012101.4	chr9	14408399
AMEXTC_0340000005584_BCL6B	chr1	10.734		ENSGALT00000011898.1	chr9	14257891
AMEXTC_0340000210831_LOC102365065	chr1	10.734		ENSGALT00000011871.4	chr9	13819174
AMEXTC_0340000237340_tumor	chr1	10.734		ENSGALT00000011850.4	chr9	13522135
AMEXTC_0340000038754_LOC102355217	chr1	10.734		ENSGALT00000004533.4	chr9	9685764
AMEXTC_0340000146267_polr2a	chr1	10.734		ENSGALT00000007929.2	chr6	12723103
AMEXTC_0340000050024_LOC108801593	chr1	10.734		ENSGALT00000014117.4	chr2	19614632
AMEXTC_0340000194474_slc16a13	chr1	10.734		ENSGALT00000006617.4	chr18	8080241
AMEXTC_0340000289383_acap1	chr1	10.734		ENSGALT00000011404.2	chr9	12171477
AMEXTC_0340000289383_acap1	chr1	10.734		ENSGALT00000011403.4	chr9	12171551
AMEXTC_0340000066162_LOC106553141	chr1	10.734		ENSGALT00000040376.2	chr21	1951814
AMEXTC_0340000066162_LOC106553141	chr1	10.734		ENSGALT00000014612.4	chr9	16972458
AMEXTC_0340000152265_TNK1	chr1	10.734		ENSGALT00000043485.1	chr9	14431461
AMEXTC_0340000022798_SLC2A4	chr1	13.507		ENSGALT00000007808.3	chr21	6450515
AMEXTC_0340000202253_cldn7.L	chr1	13.507		ENSGALT00000044685.1	chr9	13417659
AMEXTC_0340000291920_LOC109922709	chr1	13.507		ENSGALT00000013704.4	chr9	15281327
AMEXTC_0340000227188_acadvl	chr1	13.507		ENSGALT00000008070.4	chr12	5210372
AMEXTC_0340000032393_DLG4	chr1	13.507		ENSGALT00000011195.4	chr9	11959072
AMEXTC_0340000185794_GIGYF1	chr1	13.507		ENSGALT00000002246.5	chr9	491532
AMEXTC_0340000228437_ARHGEF15	chr1	19.487		ENSGALT00000002289.5	chr9	574114
AMEXTC_0340000192777_zpy1	chr1	21.615		ENSGALT00000026579.4	chr3	101015647
AMEXTC_0340000116392_CHD5	chr1	23.743		ENSGALT00000023340.4	chr21	642574
AMEXTC_0340000164641_NAA38	chr1	23.743		ENSGALT00000022387.4	chr19	31402
AMEXTC_0340000037441_EFNB3	chr1	23.743		ENSGALT00000043657.1	chr1	140329549
AMEXTC_0340000190627_dnah2.L	chr1	23.743		ENSGALT00000021223.4	chr2	76596235
AMEXTC_0340000190627_dnah2.L	chr1	23.743		ENSGALT00000011513.4	chr18	10070950
AMEXTC_0340000220946_LOXe	chr1	25.87		ENSGALT00000009416.4	chr6	17175763
AMEXTC_0340000024291_LOXe	chr1	25.87		ENSGALT00000021689.4	chrUn	21394
AMEXTC_0340000112991_LOC108788008	chr1	25.87		ENSGALT00000024762.4	chr1	84773987
AMEXTC_0340000132117_LOC108788008	chr1	25.87		ENSGALT00000024762.4	chr1	84773987
AMEXTC_0340000195994_LOC108711750	chr1	25.87		ENSGALT00000010393.4	chr9	4123824
AMEXTC_0340000192652_LOC102358281	chr1	29.131		ENSGALT00000033855.3	chr8	4792392
AMEXTC_0340000192652_LOC102358281	chr1	29.131		ENSGALT00000005254.4	chr8	4793664
AMEXTC_0340000044360_period	chr1	32.347		ENSGALT00000008858.2	chr9	4978757
AMEXTC_0340000031321_acetylcholinesterase	chr1	32.347		ENSGALT00000044990.1	chr9	20419760
AMEXTC_0340000031321_acetylcholinesterase	chr1	32.347		ENSGALT00000015430.3	chr9	20437859
AMEXTC_0340000220775_AP1S1	chr1	36.697		ENSGALT00000026710.4	chr1	121232734
AMEXTC_0340000046369_ARRB2	chr1	41.048		ENSGALT00000006763.4	chr4	1218384
AMEXTC_0340000233155_alox12	chr1	41.048		ENSGALT00000009416.4	chr6	17175763
AMEXTC_0340000163637_LOC102942052	chr1	41.048		ENSGALT00000015806.4	chr28	3057051
AMEXTC_0340000229420_ndufs7	chr1	41.048		ENSGALT00000015797.4	chr28	3064297
AMEXTC_0340000260392_REEP6	chr1	41.048		ENSGALT00000037896.2	chrZ	45811318
AMEXTC_0340000004904_APC2	chr1	41.048		ENSGALT00000046206.1	chr28	3104214
AMEXTC_0340000235091_GAMT	chr1	41.048		ENSGALT00000046022.1	chr28	3068476
AMEXTC_0340000139577_SGTA	chr1	41.048		ENSGALT00000022774.4	chr28	3145015
AMEXTC_0340000058621_THOP1	chr1	41.048		ENSGALT00000042769.1	chr28	3134476
AMEXTC_0340000009530_plk2	chr1	41.048		ENSGALT00000023748.4	chrZ	17875188
AMEXTC_0340000046518_MOGAT3	chr1	41.048		ENSGALT00000014840.4	chr1	193951673
AMEXTC_0340000265034_GADD45B	chr1	41.048		ENSGALT00000046015.1	chr8	27592043
AMEXTC_0340000269400_STK11	chr1	43.176		ENSGALT00000010803.4	chr5	13709656
AMEXTC_0340000269400_STK11	chr1	43.176		ENSGALT00000043974.1	chr5	13709147
AMEXTC_0340000061995_RNA-binding	chr1	43.176		ENSGALT00000045607.1	chr28	2970821
AMEXTC_0340000046035_CIRBP	chr1	43.176		ENSGALT00000045607.1	chr28	2970821
AMEXTC_0340000046035_CIRBP	chr1	43.176		ENSGALT00000019966.4	chr28	2971749
AMEXTC_0340000191332_ABCA7	chr1	43.176		ENSGALT00000003869.3	chr28	2822968
AMEXTC_0340000034770_ARHGAP45	chr1	43.176		ENSGALT00000009113.4	chr8	12544480
AMEXTC_0340000034770_ARHGAP45	chr1	43.176		ENSGALT00000044091.1	chr8	12546366
AMEXTC_0340000172113_arid3a.S	chr1	47.526		ENSGALT00000044479.1	chr28	2771421
AMEXTC_0340000152283_WDR18	chr1	47.526		ENSGALT00000035079.3	chr28	2792875
AMEXTC_0340000247124_TMEM259	chr1	47.526		ENSGALT00000003154.4	chr28	2813053
AMEXTC_0340000234473_R3HDM4	chr1	48.526		ENSGALT00000003109.4	chr28	4728396
AMEXTC_0340000179773_RNF126	chr1	49.632		ENSGALT00000002126.3	chr28	2663615
AMEXTC_0340000164740_FSTL3	chr1	49.632		ENSGALT00000041120.2	chr28	4325
AMEXTC_0340000064182_LOC108790337	chr1	49.632		ENSGALT00000002851.4	chr28	875
AMEXTC_0340000057224_AZU1	chr1	49.632		ENSGALT00000002851.4	chr28	875
AMEXTC_0340000143126_LOC106541429	chr1	49.632		ENSGALT00000029351.3	chrZ	16520885
AMEXTC_0340000006407_MED16	chr1	49.632		ENSGALT00000003081.4	chr28	4717569
AMEXTC_0340000241130_LOC102461656	chr1	53.982		ENSGALT00000022015.4	chrUn	8518
AMEXTC_0340000239665_PLPP2	chr1	56.11		ENSGALT00000045342.1	chr28	1143773
AMEXTC_0340000044385_LOC107120597	chr1	56.11		ENSGALT00000021823.4	chr28	1210142
AMEXTC_0340000225354_LOC106556348	chr1	56.11		ENSGALT00000005124.3	chr28	1195930
AMEXTC_0340000226860_AES	chr1	56.11		ENSGALT00000043730.1	chr28	1171970
AMEXTC_0340000018008_LOC109925183	chr1	56.11		ENSGALT00000013179.4	chr10	18969591
AMEXTC_0340000018008_LOC109925183	chr1	56.11		ENSGALT00000020536.4	chrZ	39039874
AMEXTC_0340000018008_LOC109925183	chr1	56.11		ENSGALT00000032809.3	chrZ	38331270
AMEXTC_0340000016162_S1PR4	chr1	56.11		ENSGALT00000021815.3	chr28	1215839
AMEXTC_0340000008918_LOC108442439	chr1	58.238		ENSGALT00000045826.1	chrZ	43080397
AMEXTC_0340000008918_LOC108442439	chr1	58.238		ENSGALT00000024058.2	chrZ	43031149
AMEXTC_0340000223620_LOC109320532	chr1	58.238		ENSGALT00000045746.1	chr10	14166476
AMEXTC_0340000195991_FCHO1	chr1	58.238		ENSGALT00000038495.2	chrZ	24789434
AMEXTC_0340000163779_B3GNT3	chr1	58.238		ENSGALT00000044155.1	chrUn	47262
AMEXTC_0340000022532_B3GNT3	chr1	58.238		ENSGALT00000044155.1	chrUn	47262
AMEXTC_0340000171768_ANO8	chr1	60.347		ENSGALT00000044916.1	chrUn	39423
AMEXTC_0340000132644_TM6SF2	chr1	60.347		ENSGALT00000009702.4	chr10	10715837
AMEXTC_0340000018458_CILP2	chr1	60.347		ENSGALT00000011900.3	chr10	17290314
AMEXTC_0340000184453_TMEM161A	chr1	62.475		ENSGALT00000017720.4	chrZ	60417070
AMEXTC_0340000221817_ARMC6	chr1	62.475		ENSGALT00000004779.4	chr28	3427629
AMEXTC_0340000235243_sugp2.L	chr1	62.475		ENSGALT00000004817.5	chr28	3432341
AMEXTC_0340000196387_SIN3B	chr1	62.475		ENSGALT00000005982.4	chr28	4027894
AMEXTC_0340000123582_SUGP2	chr1	62.475		ENSGALT00000004817.5	chr28	3432341
AMEXTC_0340000038954_MYO9B	chr1	62.475		ENSGALT00000040896.3	chr28	3926425
AMEXTC_0340000080842_TMEM38A	chr1	62.475		ENSGALT00000005994.4	chr28	4047182
AMEXTC_0340000228567_EPS15L1	chr1	62.475		ENSGALT00000006230.4	chr28	4108809
AMEXTC_0340000161533_ddx49	chr1	62.475		ENSGALT00000004949.2	chr28	3489320
AMEXTC_0340000222861_GDF1	chr1	62.475		ENSGALT00000005001.1	chr28	3514059
AMEXTC_0340000176300_SUGP2	chr1	62.475		ENSGALT00000004817.5	chr28	3432341
AMEXTC_0340000161508_RFXANK	chr1	62.475		ENSGALT00000043150.1	chr28	3333910
AMEXTC_0340000227578_INSR	chr1	64.603		ENSGALT00000005665.4	chr28	3878506
AMEXTC_0340000246044_ARHGEF18	chr1	64.603		ENSGALT00000005655.4	chr28	3836427
AMEXTC_0340000193046_LOC100485024	chr1	64.603		ENSGALT00000029706.3	chrZ	70457340
AMEXTC_0340000244968_LOC104347692	chr1	64.603		ENSGALT00000044959.1	chr28	3825625
AMEXTC_0340000159136_crtc1	chr1	64.603		ENSGALT00000005236.4	chr28	3581306
AMEXTC_0340000178425_KLHL26	chr1	64.603		ENSGALT00000009621.4	chr4	3175771
AMEXTC_0340000030695_ELL	chr1	64.603		ENSGALT00000005330.4	chr28	3666227
AMEXTC_0340000024449_reverse	chr1	64.603		ENSGALT00000005535.5	chr28	3782856
AMEXTC_0340000169068_PTPRS	chr1	66.731		ENSGALT00000006443.4	chr28	4410519
AMEXTC_0340000291946_TNFAIP8L1	chr1	68.859		ENSGALT00000006783.3	chr28	4703153
AMEXTC_0340000256845_UHRF1	chr1	68.859		ENSGALT00000006575.4	chr28	4594417
AMEXTC_0340000026567_LOC102948310	chr1	68.859		ENSGALT00000006765.4	chr28	4692986
AMEXTC_0340000195705_MFSD12	chr1	73.115		ENSGALT00000001153.4	chr28	1056663
AMEXTC_0340000140180_Ubxn6	chr1	73.115		ENSGALT00000001723.4	chr28	2468694
AMEXTC_0340000179364_MPND	chr1	73.115		ENSGALT00000044756.1	chr28	1303284
AMEXTC_0340000121380_STAP2	chr1	73.115		ENSGALT00000019102.3	chr4	51022486
AMEXTC_0340000168316_FSD1	chr1	73.115		ENSGALT00000024906.4	chrZ	54832500
AMEXTC_0340000136669_CACTIN	chr1	73.115		ENSGALT00000041266.2	chr28	1036060
AMEXTC_0340000240330_LOC104481215	chr1	73.115		ENSGALT00000039066.2	chr10	8240551
AMEXTC_0340000227914_NFIC	chr1	73.115		ENSGALT00000008735.4	chrZ	31233902
AMEXTC_0340000167109_DOHH	chr1	73.115		ENSGALT00000028221.2	chr28	1086889
AMEXTC_0340000082534_Fizzy-related	chr1	73.115		ENSGALT00000035693.1	chr28	1071207
AMEXTC_0340000082534_Fizzy-related	chr1	73.115		ENSGALT00000003251.4	chr28	1070517
AMEXTC_0340000055291_MATK	chr1	73.115		ENSGALT00000001052.4	chr28	961654
AMEXTC_0340000026593_LOC102948209	chr1	73.115		ENSGALT00000042673.1	chr28	976368
AMEXTC_0340000224101_TJP3	chr1	73.115		ENSGALT00000001087.5	chr28	991288
AMEXTC_0340000066413_EEF2	chr1	73.115		ENSGALT00000002831.4	chr28	1438606
AMEXTC_0340000066413_EEF2	chr1	73.115		ENSGALT00000045049.1	chr28	1438861
AMEXTC_0340000233522_MBD3	chr1	73.115		ENSGALT00000041172.1	chr28	2378592
AMEXTC_0340000179131_ZBTB7A	chr1	73.115		ENSGALT00000044229.1	chr28	1414196
AMEXTC_0340000054927_CUNH19orf35	chr1	77.465		ENSGALT00000029980.3	chr4	48998208
AMEXTC_0340000013886_LOC102347076	chr1	77.465		ENSGALT00000023521.4	chr28	2157558
AMEXTC_0340000174501_ABHD17A	chr1	77.465		ENSGALT00000029695.3	chr28	2167136
AMEXTC_0340000196209_KLF16	chr1	77.465		ENSGALT00000045929.1	chr10	5072622
AMEXTC_0340000229359_atp8b3.L	chr1	77.465		ENSGALT00000041186.2	chr28	2213414
AMEXTC_0340000003246_REXO1	chr1	77.465		ENSGALT00000001557.4	chr28	2177989
AMEXTC_0340000188955_SCAMP4	chr1	77.465		ENSGALT00000001527.4	chr28	2123736
AMEXTC_0340000175643_LONP1	chr1	81.816		ENSGALT00000000671.4	chr28	678762
AMEXTC_0340000065174_tmprss9	chr1	81.816		ENSGALT00000000620.4	chr28	615633
AMEXTC_0340000027954_acsbg2	chr1	81.816		ENSGALT00000002682.4	chr28	1630486
AMEXTC_0340000027954_acsbg2	chr1	81.816		ENSGALT00000045836.1	chr28	1633318
AMEXTC_0340000174920_MLLT1	chr1	81.816		ENSGALT00000002422.4	chr28	1650454
AMEXTC_0340000051319_LOC102939947	chr1	81.816		ENSGALT00000002155.3	chr28	1851799
AMEXTC_0340000051319_LOC102939947	chr1	81.816		ENSGALT00000002155.3	chr28	1851799
AMEXTC_0340000020576_LOC108509118	chr1	81.816		ENSGALT00000002155.3	chr28	1851799
AMEXTC_0340000015740_ZAP70	chr1	81.816		ENSGALT00000002254.4	chr28	1808516
AMEXTC_0340000051595_LOC101952039	chr1	83.944		ENSGALT00000029351.3	chrZ	16520885
AMEXTC_0340000051595_LOC101952039	chr1	83.944		ENSGALT00000021823.4	chr28	1210142
AMEXTC_0340000039935_FBN3	chr1	83.944		ENSGALT00000000433.4	chr28	271547
AMEXTC_0340000059327_LOC108802522	chr1	86.072		ENSGALT00000021807.4	chr28	1274594
AMEXTC_0340000058743_LOC103183500	chr1	86.072		ENSGALT00000006698.4	chr10	6445335
AMEXTC_0340000058743_LOC103183500	chr1	86.072		ENSGALT00000034458.3	chr10	6434757
AMEXTC_0340000256562_LOC103198887	chr1	86.072		ENSGALT00000037547.1	chr1	60058081
AMEXTC_0340000256562_LOC103198887	chr1	86.072		ENSGALT00000021139.3	chr1	60057409
AMEXTC_0340000173644_ZNF3	chr1	86.072		ENSGALT00000024926.2	chr1	91248214
AMEXTC_0340000173644_ZNF3	chr1	86.072		ENSGALT00000021794.4	chrLGE22C19W28	122074
AMEXTC_0340000172122_LOC102455588	chr1	86.072		ENSGALT00000046168.1	chrUn	5828
AMEXTC_0340000030666_lpl	chr1	88.2		ENSGALT00000037774.2	chrZ	54352515
AMEXTC_0340000060215_anxa9.L	chr1	88.2		ENSGALT00000005981.3	chr10	4583466
AMEXTC_0340000195582_CERS2	chr1	88.2		ENSGALT00000043710.1	chr25	1915045
AMEXTC_0340000195582_CERS2	chr1	88.2		ENSGALT00000043398.1	chr25	1746787
AMEXTC_0340000034445_RPRD2	chr1	88.2		ENSGALT00000044469.1	chr25	1160
AMEXTC_0340000045117_KANK3	chr1	88.2		ENSGALT00000041280.2	chr28	877451
AMEXTC_0340000023981_ADAMTSL4	chr1	88.2		ENSGALT00000006501.4	chr10	5850093
AMEXTC_0340000274036_TIMM44	chr1	88.2		ENSGALT00000000472.4	chr28	488177
AMEXTC_0340000012433_hypothetical	chr1	88.2		ENSGALT00000042991.1	chr25	1705616
AMEXTC_0340000067017_HNRNPM	chr1	88.2		ENSGALT00000000510.3	chr28	509128
AMEXTC_0340000221856_sema6c	chr1	90.328		ENSGALT00000007734.4	chr10	9404672
AMEXTC_0340000000162_IFIH1	chr1	90.328		ENSGALT00000018067.4	chr7	20543410
AMEXTC_0340000214412_GABPB2	chr1	90.328		ENSGALT00000038751.1	chr10	10361821
AMEXTC_0340000120585_LOC102934296	chr1	92.456		ENSGALT00000016631.4	chr1	77626336
AMEXTC_0340000188737_SYT11	chr1	92.456		ENSGALT00000023607.4	chr25	1456552
AMEXTC_0340000227601_GON4L	chr1	92.456		ENSGALT00000023603.4	chr25	1435903
AMEXTC_0340000054822_DAP3	chr1	92.456		ENSGALT00000023594.3	chr25	1424760
AMEXTC_0340000031330_ASH1L	chr1	92.456		ENSGALT00000023591.4	chr25	1386031
AMEXTC_0340000003807_CLK2	chr1	92.456		ENSGALT00000023584.4	chr25	3644
AMEXTC_0340000213456_SCAMP3	chr1	92.456		ENSGALT00000007047.4	chrZ	22581911
AMEXTC_0340000026214_thbs3.L	chr1	92.456		ENSGALT00000023900.4	chrZ	21874359
AMEXTC_0340000024606_TRIM46	chr1	92.456		ENSGALT00000013337.4	chrZ	78579677
AMEXTC_0340000005751_selenium	chr1	98.925		ENSGALT00000001276.4	chr25	1877555
AMEXTC_0340000005751_selenium	chr1	98.925		ENSGALT00000042688.1	chr25	2045844
AMEXTC_0340000157925_selenium	chr1	98.925		ENSGALT00000042688.1	chr25	2045844
AMEXTC_0340000157925_selenium	chr1	98.925		ENSGALT00000001277.4	chr25	1852118
AMEXTC_0340000153075_Pmvk	chr1	98.925		ENSGALT00000043717.1	chr25	1263787
AMEXTC_0340000264977_psmd4.L	chr1	98.925		ENSGALT00000042739.1	chr25	1981462
AMEXTC_0340000159420_LOC102350161	chr1	101.053		ENSGALT00000000240.4	chrZ	45459380
AMEXTC_0340000045349_ILF2	chr1	101.053		ENSGALT00000018872.4	chr25	684601
AMEXTC_0340000021010_NPR1	chr1	101.053		ENSGALT00000046104.1	chrZ	8953620
AMEXTC_0340000213144_LOC107543893	chr1	101.053		ENSGALT00000022054.4	chr25	1322852
AMEXTC_0340000213143_UBAP2L	chr1	101.053		ENSGALT00000040675.2	chr25	1301333
AMEXTC_0340000157591_ATP8B2	chr1	101.053		ENSGALT00000015070.4	chrZ	8744606
AMEXTC_0340000010441_CHRNB2	chr1	101.053		ENSGALT00000004270.4	chr25	1235468
AMEXTC_0340000009588_double-stranded	chr1	101.053		ENSGALT00000040721.2	chr25	1239379
AMEXTC_0340000012304_CELF3	chr1	101.053		ENSGALT00000043304.1	chr25	2136904
AMEXTC_0340000132661_TPM3	chr1	101.053		ENSGALT00000045378.1	chrZ	9069669
AMEXTC_0340000121204_CA14	chr1	105.404		ENSGALT00000045610.1	chr25	1566332
AMEXTC_0340000023172_CENPN	chr1	107.532		ENSGALT00000039139.2	chr11	14834308
AMEXTC_0340000055829_ITGA10	chr1	107.532		ENSGALT00000012997.4	chr10	18646161
AMEXTC_0340000059749_RNF115	chr1	107.532		ENSGALT00000002126.3	chr28	2663615
AMEXTC_0340000203086_SSR2	chr1	107.532		ENSGALT00000001109.4	chr25	1696345
AMEXTC_0340000009370_GnRH	chr1	107.532		ENSGALT00000033582.3	chr10	19479075
AMEXTC_0340000032593_SV2A	chr1	107.532		ENSGALT00000011103.3	chr10	13701911
AMEXTC_0340000202142_SF3B4	chr1	107.532		ENSGALT00000021786.4	chr25	306996
AMEXTC_0340000169427_OTUD7B	chr1	107.532		ENSGALT00000021781.4	chr25	273225
AMEXTC_0340000169427_OTUD7B	chr1	107.532		ENSGALT00000006032.4	chr10	5011022
AMEXTC_0340000179317_CDYL2	chr1	107.532		ENSGALT00000021177.4	chr11	14761129
AMEXTC_0340000031155_VAT1L	chr1	113.916		ENSGALT00000021603.4	chr11	13444163
AMEXTC_0340000049369_NUDT7	chr1	113.916		ENSGALT00000008617.4	chr11	13424045
AMEXTC_0340000014918_CDH8	chr1	116.044		ENSGALT00000008525.4	chr11	12288496
AMEXTC_0340000018946_LOC104575536	chr1	118.172		ENSGALT00000001259.3	chr11	292761
AMEXTC_0340000046162_SMPD3	chr1	118.172		ENSGALT00000001131.3	chr11	143379
AMEXTC_0340000054462_ELMO3	chr1	118.172		ENSGALT00000002702.4	chr11	995631
AMEXTC_0340000064147_Ras	chr1	118.172		ENSGALT00000008251.4	chr11	10672969
AMEXTC_0340000024612_CPNE2	chr1	118.172		ENSGALT00000002007.3	chr11	665608
AMEXTC_0340000033482_EXOC3L1	chr1	118.172		ENSGALT00000002614.4	chr11	972849
AMEXTC_0340000214307_KIAA0895L	chr1	118.172		ENSGALT00000019783.3	chr2	47359886
AMEXTC_0340000240257_CCDC102A	chr1	118.172		ENSGALT00000030959.3	chr2	94088924
AMEXTC_0340000001951_ADGRG5	chr1	118.172		ENSGALT00000001727.4	chr11	540587
AMEXTC_0340000014280_ADGRG1	chr1	118.172		ENSGALT00000040435.2	chr11	529482
AMEXTC_0340000000800_LOC101946154	chr1	118.172		ENSGALT00000034389.3	chr11	2635482
AMEXTC_0340000202542_PLA2G15	chr1	118.172		ENSGALT00000001117.4	chr11	69376
AMEXTC_0340000015632_CA7	chr1	118.172		ENSGALT00000008264.4	chr11	10763463
AMEXTC_0340000243066_hydin	chr1	120.3		ENSGALT00000003789.4	chr11	1537249
AMEXTC_0340000231663_hydin	chr1	120.3		ENSGALT00000003789.4	chr11	1537249
AMEXTC_0340000176193_VAC14	chr1	120.3		ENSGALT00000003878.3	chr11	1641768
AMEXTC_0340000012434_MTSS1L	chr1	120.3		ENSGALT00000003894.3	chr11	1695688
AMEXTC_0340000207987_sf3b3	chr1	120.3		ENSGALT00000003987.4	chr11	1714128
AMEXTC_0340000040793_FUK	chr1	120.3		ENSGALT00000004174.4	chr11	1757520
AMEXTC_0340000145837_AARS	chr1	120.3		ENSGALT00000003047.4	chr11	1165617
AMEXTC_0340000231990_LOC102379799	chr1	120.3		ENSGALT00000046077.1	chr11	1183401
AMEXTC_0340000043737_LOC109310426	chr1	120.3		ENSGALT00000003083.4	chr11	1189503
AMEXTC_0340000134796_PDPR	chr1	120.3		ENSGALT00000004241.4	chr11	1775733
AMEXTC_0340000185695_GFOD2	chr1	120.3		ENSGALT00000040402.1	chr11	591975
AMEXTC_0340000057175_RASGRP3	chr1	120.3		ENSGALT00000016992.5	chr3	30420674
AMEXTC_0340000167970_SLC38A7	chr1	120.3		ENSGALT00000003637.3	chr11	1461222
AMEXTC_0340000006509_calb2.S	chr1	120.3		ENSGALT00000042987.1	chr11	1479309
AMEXTC_0340000154261_CMTR2	chr1	120.3		ENSGALT00000003716.3	chr11	1503663
AMEXTC_0340000003662_lcat	chr1	120.3		ENSGALT00000043822.1	chr11	1029317
AMEXTC_0340000122336_ctrl	chr1	120.3		ENSGALT00000000051.3	chr11	1959123
AMEXTC_0340000179841_fhod1.L	chr1	120.3		ENSGALT00000003437.5	chr11	1336784
AMEXTC_0340000172936_LOC108800614	chr1	120.3		ENSGALT00000002818.3	chr11	1155406
AMEXTC_0340000172936_LOC108800614	chr1	120.3		ENSGALT00000002760.4	chr11	1064190
AMEXTC_0340000200642_LOC102931768	chr1	120.3		ENSGALT00000040439.2	chr11	520633
AMEXTC_0340000073995_LOC102932553	chr1	120.3		ENSGALT00000037547.1	chr1	60058081
AMEXTC_0340000073995_LOC102932553	chr1	120.3		ENSGALT00000021139.3	chr1	60057409
AMEXTC_0340000073995_LOC102932553	chr1	120.3		ENSGALT00000021794.4	chrLGE22C19W28	122074
AMEXTC_0340000158609_BCAR1	chr1	120.3		ENSGALT00000044645.1	chr11	1965020
AMEXTC_0340000225581_ctcf.S	chr1	120.3		ENSGALT00000002811.2	chr11	1102640
AMEXTC_0340000020776_KIFC3	chr1	120.3		ENSGALT00000001503.4	chr11	479414
AMEXTC_0340000180947_KATNB1	chr1	120.3		ENSGALT00000040450.2	chr11	488203
AMEXTC_0340000195262_SETD6	chr1	120.3		ENSGALT00000003518.4	chr11	1398992
AMEXTC_0340000195262_SETD6	chr1	120.3		ENSGALT00000044807.1	chrUn	5103
AMEXTC_0340000195262_SETD6	chr1	120.3		ENSGALT00000043156.1	chrUn	5841
AMEXTC_0340000180261_EDC4	chr1	120.3		ENSGALT00000002498.4	chr11	907973
AMEXTC_0340000231457_PLEKHG4	chr1	120.3		ENSGALT00000040176.2	chr11	1240507
AMEXTC_0340000039064_RIPOR1	chr1	120.3		ENSGALT00000002797.4	chr11	1073881
AMEXTC_0340000145871_WDR59	chr1	120.3		ENSGALT00000004428.4	chr11	1893869
AMEXTC_0340000026836_ldhd.L	chr1	120.3		ENSGALT00000039942.2	chr11	1954984
AMEXTC_0340000206329_LOC102560429	chr1	120.3		ENSGALT00000045914.1	chr11	1395106
AMEXTC_0340000031622_LOC108800614	chr1	120.3		ENSGALT00000002760.4	chr11	1064190
AMEXTC_0340000241667_HSD11B2	chr1	120.3		ENSGALT00000045369.1	chr11	1354998
AMEXTC_0340000241667_HSD11B2	chr1	120.3		ENSGALT00000003471.4	chr11	10627
AMEXTC_0340000190751_atp6v0d1.L	chr1	120.3		ENSGALT00000003500.4	chr11	1365296
AMEXTC_0340000056743_ISG20L2	chr1	129.104		ENSGALT00000010894.4	chr10	12623610
AMEXTC_0340000005700_nek2	chr1	129.104		ENSGALT00000043691.1	chr25	433335
AMEXTC_0340000216161_insulin	chr1	129.104		ENSGALT00000021642.4	chr25	424855
AMEXTC_0340000238255_LOC108699388	chr1	129.104		ENSGALT00000021640.4	chr25	416280
AMEXTC_0340000014151_LOC108796764	chr1	129.104		ENSGALT00000012349.2	chr10	17666848
AMEXTC_0340000157570_ETHE1	chr1	133.455		ENSGALT00000029791.3	chrUn	1139
AMEXTC_0340000260738_EIF3F	chr1	133.455		ENSGALT00000008544.4	chr6	15770016
AMEXTC_0340000064900_TOMM40L	chr1	133.455		ENSGALT00000022441.4	chrUn	2179
AMEXTC_0340000192925_ILVBL	chr1	133.455		ENSGALT00000043396.1	chrUn	20
AMEXTC_0340000161884_LOC102946650	chr1	133.455		ENSGALT00000044579.1	chr25	1678199
AMEXTC_0340000205828_LOC110391971	chr1	135.583		ENSGALT00000040208.2	chr18	30333
AMEXTC_0340000205828_LOC110391971	chr1	135.583		ENSGALT00000029406.3	chr2	350395
AMEXTC_0340000225665_LOC104577560	chr1	135.583		ENSGALT00000019575.4	chr16	209965
AMEXTC_0340000098131_Zfp182	chr1	135.583		ENSGALT00000037547.1	chr1	60058081
AMEXTC_0340000098131_Zfp182	chr1	135.583		ENSGALT00000021139.3	chr1	60057409
AMEXTC_0340000098131_Zfp182	chr1	135.583		ENSGALT00000000466.4	chrUn	4173
AMEXTC_0340000098131_Zfp182	chr1	135.583		ENSGALT00000029406.3	chr2	350395
AMEXTC_0340000233392_CETP	chr1	137.711		ENSGALT00000001871.4	chr11	620993
AMEXTC_0340000180537_MBTPS1	chr1	137.711		ENSGALT00000005216.4	chr11	2492432
AMEXTC_0340000211068_PLEKHG6	chr1	137.711		ENSGALT00000045724.1	chr21	588596
AMEXTC_0340000002966_NECAB2	chr1	137.711		ENSGALT00000005243.4	chr11	2518959
AMEXTC_0340000044054_OSGIN1	chr1	137.711		ENSGALT00000005262.4	chr11	2590159
AMEXTC_0340000168581_usf2	chr1	142.061		ENSGALT00000000535.4	chrUn	16
AMEXTC_0340000123370_hypothetical	chr1	142.061		ENSGALT00000040522.2	chr24	5803420
AMEXTC_0340000123370_hypothetical	chr1	142.061		ENSGALT00000012723.4	chr24	5806900
AMEXTC_0340000165727_KMT2B	chr1	144.189		ENSGALT00000011022.4	chr24	4343440
AMEXTC_0340000243728_LOC102946739	chr1	146.317		ENSGALT00000022891.3	chrUn	11674
AMEXTC_0340000182240_arhgap33	chr1	146.317		ENSGALT00000001808.4	chr24	1142721
AMEXTC_0340000017329_kirrel2	chr1	146.317		ENSGALT00000010117.4	chr25	325960
AMEXTC_0340000277518_LOC110538136	chr1	146.317		ENSGALT00000002027.4	chr24	1570926
AMEXTC_0340000155844_LOC101942353	chr1	148.445		ENSGALT00000020468.3	chrUn	359
AMEXTC_0340000204191_LOC108697889	chr1	148.445		ENSGALT00000020468.3	chrUn	359
AMEXTC_0340000204191_LOC108697889	chr1	148.445		ENSGALT00000022891.3	chrUn	11674
AMEXTC_0340000204191_LOC108697889	chr1	148.445		ENSGALT00000011664.4	chr9	12628992
AMEXTC_0340000243727_FCGBP	chr1	148.445		ENSGALT00000011664.4	chr9	12628992
AMEXTC_0340000003048_LOC108696889	chr1	148.445		ENSGALT00000011664.4	chr9	12628992
AMEXTC_0340000007155_LOC101947369	chr1	148.445		ENSGALT00000022891.3	chrUn	11674
AMEXTC_0340000046190_GRAMD1A	chr1	152.701		ENSGALT00000010494.4	chr24	2902287
AMEXTC_0340000125683_LOC108802257	chr1	152.701		ENSGALT00000044391.1	chrUn	3225
AMEXTC_0340000008377_FCGBP	chr1	154.829		ENSGALT00000011664.4	chr9	12628992
AMEXTC_0340000030944_FCGBP	chr1	154.829		ENSGALT00000011664.4	chr9	12628992
AMEXTC_0340000180125_b4galt3	chr1	154.829		ENSGALT00000024316.4	chr1	80061830
AMEXTC_0340000180125_b4galt3	chr1	154.829		ENSGALT00000029706.3	chrZ	70457340
AMEXTC_0340000038975_lrrc4b	chr1	157.957		ENSGALT00000012910.4	chr5	19803070
AMEXTC_0340000043097_lrrc4b	chr1	157.957		ENSGALT00000012910.4	chr5	19803070
AMEXTC_0340000039130_CLEC11A	chr1	177.495		ENSGALT00000021599.4	chr11	13502851
AMEXTC_0340000039130_CLEC11A	chr1	177.495		ENSGALT00000019389.1	chr2	43675441
AMEXTC_0340000137779_UTP18	chr1	177.495		ENSGALT00000004723.4	chr18	5070323
AMEXTC_0340000004400_rcn3.L	chr1	177.495		ENSGALT00000040104.2	chr5	5240085
AMEXTC_0340000251646_PRRG2	chr1	177.495		ENSGALT00000019634.4	chr5	5617014
AMEXTC_0340000043279_RIC8A	chr1	177.495		ENSGALT00000006659.4	chr5	1632148
AMEXTC_0340000010521_slc17a8.L	chr1	183.973		ENSGALT00000005849.4	chr5	2813098
AMEXTC_0340000060528_ferritin	chr1	183.973		ENSGALT00000011687.4	chr5	16149679
AMEXTC_0340000155499_ferritin	chr1	183.973		ENSGALT00000011687.4	chr5	16149679
AMEXTC_0340000164382_GYS1	chr1	183.973		ENSGALT00000021664.4	chr1	67195293
AMEXTC_0340000213480_kif18b	chr1	183.973		ENSGALT00000001292.4	chr27	1315854
AMEXTC_0340000039464_LIN7B	chr1	183.973		ENSGALT00000040172.1	chr5	3714444
AMEXTC_0340000034112_ppfia3	chr1	183.973		ENSGALT00000012438.4	chr5	17140751
AMEXTC_0340000018540_dusp8	chr1	183.973		ENSGALT00000010751.3	chr5	13542900
AMEXTC_0340000012370_TBC1D17	chr1	183.973		ENSGALT00000016566.3	chr1	36415500
AMEXTC_0340000150741_tub	chr1	183.973		ENSGALT00000010295.3	chr26	55540
AMEXTC_0340000150741_tub	chr1	183.973		ENSGALT00000009626.4	chr5	9634000
AMEXTC_0340000188020_dhdh	chr1	183.973		ENSGALT00000045450.1	chrUn	20
AMEXTC_0340000177676_slc6a16.S	chr1	183.973		ENSGALT00000017902.4	chr1	41521591
AMEXTC_0340000199249_LOC108800660	chr1	183.973		ENSGALT00000039572.2	chr5	11205874
AMEXTC_0340000037137_LOC108789546	chr1	202.041		ENSGALT00000023397.3	chr18	1699019
AMEXTC_0340000173618_myosin-10-like	chr1	202.041		ENSGALT00000023397.3	chr18	1699019
AMEXTC_0340000280142_LOC100493724	chr1	202.041		ENSGALT00000011890.4	chr18	10259333
AMEXTC_0340000003612_rasip1.S	chr1	202.041		ENSGALT00000007176.3	chr14	4012960
AMEXTC_0340000188273_ube2s.S	chr1	202.041		ENSGALT00000014088.1	chr4	16506436
AMEXTC_0340000188273_ube2s.S	chr1	202.041		ENSGALT00000020119.4	chr4	60519149
AMEXTC_0340000019076_SULT2B1	chr1	202.041		ENSGALT00000014841.4	chrLGE64	538555
AMEXTC_0340000010997_ZNF579	chr1	202.041		ENSGALT00000046188.1	chrUn	269
AMEXTC_0340000010997_ZNF579	chr1	202.041		ENSGALT00000046188.1	chrUn	269
AMEXTC_0340000174983_ZNF865	chr1	202.041		ENSGALT00000021139.3	chr1	60057409
AMEXTC_0340000218239_sbk1	chr1	202.041		ENSGALT00000022935.3	chr14	12938586
AMEXTC_0340000267550_znf628.S	chr1	202.041		ENSGALT00000005575.3	chr23	5179675
AMEXTC_0340000033394_LOC110390411	chr1	202.041		ENSGALT00000014886.4	chrLGE64	554373
AMEXTC_0340000029226_LOC101949312	chr1	202.041		ENSGALT00000044562.1	chrLGE64	519297
AMEXTC_0340000056877_LOC104527945	chr1	202.041		ENSGALT00000014886.4	chrLGE64	554373
AMEXTC_0340000056877_LOC104527945	chr1	202.041		ENSGALT00000044562.1	chrLGE64	519297
AMEXTC_0340000056877_LOC104527945	chr1	202.041		ENSGALT00000014816.3	chrLGE64	610460
AMEXTC_0340000042317_LOC108696650	chr1	202.041		ENSGALT00000045707.1	chrLGE64	684877
AMEXTC_0340000047869_ZNF423	chr1	204.169		ENSGALT00000006188.4	chr11	6182056
AMEXTC_0340000043306_dbp	chr1	204.169		ENSGALT00000004832.4	chr18	5880923
AMEXTC_0340000256850_LONP2	chr1	206.297		ENSGALT00000006283.3	chr11	6864117
AMEXTC_0340000132475_SIAH1	chr1	206.297		ENSGALT00000006236.3	chr11	6797779
AMEXTC_0340000059067_ITFG1	chr1	206.297		ENSGALT00000006444.3	chr11	7064472
AMEXTC_0340000103085_PHKB	chr1	206.297		ENSGALT00000042911.1	chr11	6992609
AMEXTC_0340000103085_PHKB	chr1	206.297		ENSGALT00000006378.1	chr11	6993849
AMEXTC_0340000207250_neto2.S	chr1	222.206		ENSGALT00000006474.4	chr11	7152633
AMEXTC_0340000027884_MYLK3	chr1	222.206		ENSGALT00000006871.4	chr11	7284404
AMEXTC_0340000080971_LOC101937707	chr1	222.206		ENSGALT00000044199.1	chr11	7596757
AMEXTC_0340000180260_LOC101937707	chr1	222.206		ENSGALT00000044199.1	chr11	7596757
AMEXTC_0340000036326_ZNF536	chr1	235.361		ENSGALT00000034103.2	chr11	8249368
AMEXTC_0340000009792_LOC104625553	chr1	235.361		ENSGALT00000034103.2	chr11	8249368
AMEXTC_0340000292171_URI1	chr1	235.361		ENSGALT00000007178.4	chr11	7961121
AMEXTC_0340000275217_naxe.L	chr1	237.489		ENSGALT00000045270.1	chrUn	63793
AMEXTC_0340000010586_BCAN	chr1	237.489		ENSGALT00000021615.4	chr25	494217
AMEXTC_0340000260780_TMEM79	chr1	237.489		ENSGALT00000044021.1	chrUn	20
AMEXTC_0340000046196_LOC108802041	chr1	237.489		ENSGALT00000010720.3	chr10	12352255
AMEXTC_0340000046733_LMNA	chr1	237.489		ENSGALT00000000640.3	chr28	636057
AMEXTC_0340000010478_PAQR6	chr1	237.489		ENSGALT00000013111.4	chr10	18823403
AMEXTC_0340000260710_SMG5	chr1	237.489		ENSGALT00000014661.4	chr25	689
AMEXTC_0340000195282_LOC102456231	chr1	237.489		ENSGALT00000008207.4	chr11	10631032
AMEXTC_0340000208729_UBA2	chr1	237.489		ENSGALT00000008017.4	chr11	10610356
AMEXTC_0340000066385_GPI	chr1	237.489		ENSGALT00000007948.2	chr11	10450874
AMEXTC_0340000039619_LOC107214511	chr1	237.489		ENSGALT00000012312.2	chr10	17646168
AMEXTC_0340000137902_UBQLN4	chr1	237.489		ENSGALT00000022714.4	chr25	146994
AMEXTC_0340000063799_GAN	chr1	237.489		ENSGALT00000021912.4	chr11	14938774
AMEXTC_0340000000874_NECTIN4	chr1	239.617		ENSGALT00000024797.4	chr1	87611976
AMEXTC_0340000052620_NCSTN	chr1	239.617		ENSGALT00000014892.4	chr25	1174613
AMEXTC_0340000137772_DCAF8	chr1	239.617		ENSGALT00000044912.1	chrUn	20
AMEXTC_0340000015936_VANGL2	chr1	239.617		ENSGALT00000040737.2	chr25	1203874
AMEXTC_0340000155970_LOC104062839	chr1	239.617		ENSGALT00000028290.4	chr25	475092
AMEXTC_0340000241512_vacuolar	chr1	239.617		ENSGALT00000023895.3	chr1	78620628
AMEXTC_0340000241512_vacuolar	chr1	239.617		ENSGALT00000023896.2	chr1	78620628
AMEXTC_0340000013876_KCNJ9	chr1	241.745		ENSGALT00000001790.4	chr24	1073170
AMEXTC_0340000196081_IST1	chr1	243.873		ENSGALT00000001181.3	chr11	19166597
AMEXTC_0340000171902_ZNF821	chr1	243.873		ENSGALT00000001191.4	chr11	19175525
AMEXTC_0340000158778_ATXN1L	chr1	243.873		ENSGALT00000043828.1	chr11	19192363
AMEXTC_0340000059389_LOC104405384	chr1	243.873		ENSGALT00000001245.4	chr11	19195951
AMEXTC_0340000192857_Phlpp2	chr1	243.873		ENSGALT00000001289.4	chr11	19238987
AMEXTC_0340000219227_PHLPP2	chr1	243.873		ENSGALT00000001289.4	chr11	19238987
AMEXTC_0340000005760_ZFHX3	chr1	246.001		ENSGALT00000001009.4	chr11	18936950
AMEXTC_0340000296016_ZFHX3	chr1	246.001		ENSGALT00000001009.4	chr11	18936950
AMEXTC_0340000088074_LOC102562298	chr1	246.001		ENSGALT00000001009.4	chr11	18936950
AMEXTC_0340000069208_hypothetical	chr1	246.001		ENSGALT00000023210.4	chrUn	13810
AMEXTC_0340000069208_hypothetical	chr1	246.001		ENSGALT00000020563.4	chrZ	39936509
AMEXTC_0340000050637_HNRNPK	chr1	246.001		ENSGALT00000023210.4	chrUn	13810
AMEXTC_0340000050637_HNRNPK	chr1	246.001		ENSGALT00000020563.4	chrZ	39936509
AMEXTC_0340000283973_CHMP1A	chr1	250.352		ENSGALT00000033674.3	chr11	18202288
AMEXTC_0340000214550_IPO11	chr1	250.352		ENSGALT00000023770.4	chrZ	19348932
AMEXTC_0340000214192_TANGO6	chr1	250.352		ENSGALT00000000885.4	chr11	1748
AMEXTC_0340000250470_cdh1.S	chr1	250.352		ENSGALT00000000857.4	chr11	18317571
AMEXTC_0340000019117_LOC101945697	chr1	250.352		ENSGALT00000000857.4	chr11	18317571
AMEXTC_0340000126432_LOC101942423	chr1	250.352		ENSGALT00000000855.4	chr11	18310976
AMEXTC_0340000126432_LOC101942423	chr1	250.352		ENSGALT00000000857.4	chr11	18317571
AMEXTC_0340000164733_GAS8	chr1	250.352		ENSGALT00000000745.4	chr11	18300554
AMEXTC_0340000190016_DEF8	chr1	250.352		ENSGALT00000044355.1	chr11	18293265
AMEXTC_0340000045678_NFAT5	chr1	250.352		ENSGALT00000000947.4	chr11	18415929
AMEXTC_0340000050186_NOB1	chr1	250.352		ENSGALT00000000977.3	chr11	18484991
AMEXTC_0340000036886_WWP2	chr1	250.352		ENSGALT00000000991.4	chr11	18487654
AMEXTC_0340000027745_SNTB2	chr1	250.352		ENSGALT00000044236.1	chr11	18365412
AMEXTC_0340000125111_NIP7	chr1	250.352		ENSGALT00000000923.4	chr11	18378689
AMEXTC_0340000125112_TMED6	chr1	250.352		ENSGALT00000000929.3	chr11	18380394
AMEXTC_0340000061044_UTP4	chr1	250.352		ENSGALT00000000910.4	chr11	18360465
AMEXTC_0340000201108_ALKBH3	chr1	259.2		ENSGALT00000012966.4	chr5	20943445
AMEXTC_0340000064650_CDH15	chr1	259.2		ENSGALT00000008180.4	chr20	7702267
AMEXTC_0340000057720_LOC101348352	chr1	259.2		ENSGALT00000010048.4	chr11	18039023
AMEXTC_0340000044111_CBFA2T3	chr1	259.2		ENSGALT00000038903.2	chr11	17999325
AMEXTC_0340000004345_APRT	chr1	263.619		ENSGALT00000044339.1	chr11	17936905
AMEXTC_0340000163610_PIEZO1	chr1	263.619		ENSGALT00000010154.4	chr11	17911235
AMEXTC_0340000224795_CTU2	chr1	263.619		ENSGALT00000010192.4	chr11	17907682
AMEXTC_0340000028314_ANKRD11	chr1	263.619		ENSGALT00000010046.4	chr11	18078995
AMEXTC_0340000190215_ZFPM1	chr1	269.892		ENSGALT00000009844.4	chr11	17837658
AMEXTC_0340000051275_ZNF469	chr1	269.892		ENSGALT00000044706.1	chr11	17795543
AMEXTC_0340000234920_ZDHHC7	chr1	274.598		ENSGALT00000009174.3	chr11	16483337
AMEXTC_0340000010213_JPH3	chr1	274.598		ENSGALT00000009303.3	chr11	17334738
AMEXTC_0340000225046_CA5A	chr1	274.598		ENSGALT00000009408.4	chr11	17466269
AMEXTC_0340000048974_atp2c2.L	chr1	274.598		ENSGALT00000008945.4	chr11	16206989
AMEXTC_0340000174200_KLHL36	chr1	274.598		ENSGALT00000028346.4	chr11	16284724
AMEXTC_0340000186698_USP10	chr1	274.598		ENSGALT00000009099.4	chr11	16340216
AMEXTC_0340000035899_crispld2.S	chr1	274.598		ENSGALT00000009128.4	chr11	16374570
AMEXTC_0340000248319_GSE1	chr1	276.726		ENSGALT00000023100.4	chr11	17104457
AMEXTC_0340000039639_emc8	chr1	276.726		ENSGALT00000009226.3	chr11	17081810
AMEXTC_0340000224545_LOC104469002	chr1	276.726		ENSGALT00000009231.2	chr11	17077533
AMEXTC_0340000025242_dusp22a.L	chr1	276.726		ENSGALT00000009240.4	chr11	17066582
AMEXTC_0340000032624_IRF8	chr1	276.726		ENSGALT00000009243.3	chr11	17057904
AMEXTC_0340000060469_LOC102381265	chr1	289.25		ENSGALT00000022726.3	chr1	67337859
AMEXTC_0340000054381_LOC108695911	chr1	296.912		ENSGALT00000001120.4	chr11	342412
AMEXTC_0340000200321_cyth1	chr1	296.912		ENSGALT00000011578.4	chr14	8877921
AMEXTC_0340000017459_socs3	chr1	301.308		ENSGALT00000043264.1	chr18	10116717
AMEXTC_0340000174677_mboat7	chr1	301.308		ENSGALT00000026473.3	chr3	95513203
AMEXTC_0340000166094_MTHFSD	chr1	301.308		ENSGALT00000009186.5	chr11	16833439
AMEXTC_0340000043869_LOC108697262	chr1	303.436		ENSGALT00000032650.3	chr5	22280277
AMEXTC_0340000019380_plekha4	chr1	303.436		ENSGALT00000009825.4	chr5	10959447
AMEXTC_0340000020962_LOC108798327	chr1	304.393		ENSGALT00000011206.4	chr18	9578500
AMEXTC_0340000236587_GRIN2D	chr1	305.542		ENSGALT00000044113.1	chr18	10769811
AMEXTC_0340000240327_KDELR1	chr1	305.542		ENSGALT00000011481.4	chr14	8783750
AMEXTC_0340000005235_NFATC1	chr1	312.254		ENSGALT00000020648.4	chr2	56697423
AMEXTC_0340000002822_eps8l1.L	chr1	320.893		ENSGALT00000043032.1	chr5	1777
AMEXTC_0340000002822_eps8l1.L	chr1	320.893		ENSGALT00000042963.1	chrUn	4382
AMEXTC_0340000015743_cd37	chr1	320.893		ENSGALT00000013052.4	chr5	21271277
AMEXTC_0340000191205_cardiac	chr1	320.893		ENSGALT00000000419.4	chr26	774173
AMEXTC_0340000020914_brsk1	chr1	323.021		ENSGALT00000043974.1	chr5	13709147
AMEXTC_0340000260391_HSPBP1	chr1	323.021		ENSGALT00000044897.1	chrUn	20
AMEXTC_0340000024009_ppp6r1	chr1	323.021		ENSGALT00000032683.1	chr5	15837569
AMEXTC_0340000238038_LOC101733761	chr1	323.021		ENSGALT00000000466.4	chrUn	4173
AMEXTC_0340000238038_LOC101733761	chr1	323.021		ENSGALT00000022016.4	chr16	478725
AMEXTC_0340000238038_LOC101733761	chr1	323.021		ENSGALT00000041141.2	chr16	478530
AMEXTC_0340000131615_dnaJ-like	chr1	323.021		ENSGALT00000012853.4	chr2	17662536
AMEXTC_0340000077165_mtif2.L	chr1	326.863		ENSGALT00000013175.4	chr3	34593
AMEXTC_0340000049484_rps27a	chr1	326.863		ENSGALT00000013189.4	chr3	30835
AMEXTC_0340000225063_TERT	chr1	326.863		ENSGALT00000021539.3	chr2	85762001
AMEXTC_0340000021506_PNAT10	chr1	337.411		ENSGALT00000008794.2	chr11	15257512
AMEXTC_0340000055111_NAT1	chr1	337.411		ENSGALT00000008792.3	chr11	15251699
AMEXTC_0340000055111_NAT1	chr1	337.411		ENSGALT00000008794.2	chr11	15257512
AMEXTC_0340000001709_PLCG2	chr1	342		ENSGALT00000008752.4	chr11	15140810
AMEXTC_0340000169220_CMIP	chr1	342		ENSGALT00000019601.4	chr11	14995343
AMEXTC_0340000047405_CDH13	chr1	342		ENSGALT00000008808.4	chr11	15430488
AMEXTC_0340000015217_mphosph6.L	chr1	342		ENSGALT00000008799.4	chr11	15265824
AMEXTC_0340000061890_SDR42E1	chr1	342		ENSGALT00000008756.3	chr11	15197529
AMEXTC_0340000051496_LOC108714094	chr1	344.972		ENSGALT00000025689.4	chr2	125632567
AMEXTC_0340000008689_slc7a10	chr1	349.323		ENSGALT00000007532.4	chr11	9573439
AMEXTC_0340000048069_LOC107552765	chr1	349.323		ENSGALT00000043831.1	chrUn	43
AMEXTC_0340000217017_thap7.S	chr1	349.323		ENSGALT00000043600.1	chrUn	78
AMEXTC_0340000004259_ZBTB45	chr1	349.323		ENSGALT00000024346.4	chr1	82324876
AMEXTC_0340000177506_GPATCH1	chr1	349.323		ENSGALT00000007726.4	chr11	9503136
AMEXTC_0340000122094_PEPD	chr1	351.451		ENSGALT00000007832.4	chr11	9804381
AMEXTC_0340000005925_CHST8	chr1	351.451		ENSGALT00000007842.4	chr11	10016611
AMEXTC_0340000053128_NKD1	chr1	353.579		ENSGALT00000005977.4	chr11	5725576
AMEXTC_0340000002960_NOD2	chr1	353.579		ENSGALT00000018808.4	chr2	41819533
AMEXTC_0340000207697_LOC104912954	chr1	353.579		ENSGALT00000016123.4	chr11	5636332
AMEXTC_0340000223554_Transcription	chr1	353.579		ENSGALT00000008225.4	chr20	8020375
AMEXTC_0340000079565_kiaa0355	chr1	353.579		ENSGALT00000007938.4	chr11	10376829
AMEXTC_0340000054889_CHD9	chr1	360.035		ENSGALT00000024950.4	chr2	112612963
AMEXTC_0340000027111_CHD9	chr1	360.035		ENSGALT00000005902.4	chr11	4503007
AMEXTC_0340000007196_LOC109091304	chr1	360.035		ENSGALT00000005902.4	chr11	4503007
AMEXTC_0340000038853_FTO	chr1	362.163		ENSGALT00000005680.4	chr11	4129193
AMEXTC_0340000238727_RPGRIP1L	chr1	362.163		ENSGALT00000039713.2	chr11	4357662
AMEXTC_0340000029285_MMP2	chr1	362.163		ENSGALT00000005666.3	chr11	3182493
AMEXTC_0340000018903_kcnn4	chr1	362.163		ENSGALT00000004004.4	chrZ	73093352
AMEXTC_0340000280189_OGFOD1	chr1	362.163		ENSGALT00000004848.4	chr11	2138804
AMEXTC_0340000059540_BBS2	chr1	362.163		ENSGALT00000004813.4	chr11	2119715
AMEXTC_0340000143343_GNAO1	chr1	362.163		ENSGALT00000005006.3	chr11	2195647
AMEXTC_0340000031219_LOC108714028	chr1	362.163		ENSGALT00000011338.4	chr24	4452330
AMEXTC_0340000214417_LOC110313547	chr1	362.163		ENSGALT00000037547.1	chr1	60058081
AMEXTC_0340000214417_LOC110313547	chr1	362.163		ENSGALT00000021139.3	chr1	60057409
AMEXTC_0340000158274_C15H16orf70	chr1	362.163		ENSGALT00000005051.4	chr11	2386803
AMEXTC_0340000014838_LOC108696816	chr1	362.163		ENSGALT00000013983.4	chr7	12068536
AMEXTC_0340000182903_DDX28	chr1	362.163		ENSGALT00000005401.4	chr11	2901703
AMEXTC_0340000000146_irx5	chr1	362.163		ENSGALT00000021554.4	chr2	86624613
AMEXTC_0340000055597_TRADD	chr1	362.163		ENSGALT00000005064.4	chr11	2432267
AMEXTC_0340000146842_NUDT21	chr1	362.163		ENSGALT00000004875.3	chr11	2147218
AMEXTC_0340000030453_NFATC3	chr1	362.163		ENSGALT00000005367.4	chr11	2799113
AMEXTC_0340000130259_Herpud1	chr1	362.163		ENSGALT00000001852.4	chr11	613333
AMEXTC_0340000284740_NUP93	chr1	362.163		ENSGALT00000004754.4	chr11	2038583
AMEXTC_0340000057183_SLC12A4	chr1	362.163		ENSGALT00000005597.4	chr11	2960314
AMEXTC_0340000164360_LOC110089618	chr1	370.98		ENSGALT00000010524.2	chr24	3069115
AMEXTC_0340000247593_LOC108785514	chr1	380.094		ENSGALT00000011876.5	chr24	5414101
AMEXTC_0340000158963_LOC101950676	chr1	380.094		ENSGALT00000021794.4	chrLGE22C19W28	122074
AMEXTC_0340000158961_LOC100027742	chr1	380.094		ENSGALT00000046188.1	chrUn	269
AMEXTC_0340000207951_PMEPA1	chr1	382.222		ENSGALT00000012343.4	chr20	11868022
AMEXTC_0340000044914_grik5	chr1	384.35		ENSGALT00000010723.3	chr24	3583188
AMEXTC_0340000039245_LOC106550989	chr1	384.35		ENSGALT00000024196.4	chr1	79683347
AMEXTC_0340000055718_LOC102349733	chr1	386.652		ENSGALT00000046188.1	chrUn	269
AMEXTC_0340000236512_MEGF8	chr1	412.572		ENSGALT00000025829.4	chr4	88729860
AMEXTC_0340000180085_CBLC	chr1	414.7		ENSGALT00000010949.3	chr24	4220400
AMEXTC_0340000180085_CBLC	chr1	414.7		ENSGALT00000024772.4	chr1	86037077
AMEXTC_0340000207235_atp12a-like	chr1	419.062		ENSGALT00000010445.4	chr24	2845499
AMEXTC_0340000181016_lrrc52	chr1	421.201		ENSGALT00000005451.4	chr8	5451456
AMEXTC_0340000051098_ALDH9A1	chr1	421.201		ENSGALT00000005530.4	chr8	5461869
AMEXTC_0340000076399_TRMT1L	chr1	421.201		ENSGALT00000045512.1	chr8	19376
AMEXTC_0340000284718_BCAM	chr1	421.201		ENSGALT00000010943.4	chr24	4206158
AMEXTC_0340000225319_LOC102367138	chr1	421.201		ENSGALT00000040594.2	chr24	5574123
AMEXTC_0340000063146_xcxcra	chr1	421.201		ENSGALT00000019505.4	chr2	44992368
AMEXTC_0340000023686_EDEM3	chr1	423.329		ENSGALT00000007675.4	chr8	7903723
AMEXTC_0340000052553_FAM129A	chr1	423.329		ENSGALT00000007683.3	chr8	7933907
AMEXTC_0340000051803_RNF2	chr1	423.329		ENSGALT00000007706.4	chr8	8022598
AMEXTC_0340000178695_COLGALT2	chr1	423.329		ENSGALT00000039353.2	chr8	7708807
AMEXTC_0340000008885_FAM78B	chr1	425.457		ENSGALT00000004803.2	chr8	4287364
AMEXTC_0340000043014_fmo5.S	chr1	425.457		ENSGALT00000004777.3	chr8	4280637
AMEXTC_0340000113273_LOC106737209	chr1	425.457		ENSGALT00000004777.3	chr8	4280637
AMEXTC_0340000034762_Roquin	chr1	425.457		ENSGALT00000007304.4	chr8	7367590
AMEXTC_0340000060858_LOC101937948	chr1	427.585		ENSGALT00000007329.4	chr8	7398817
AMEXTC_0340000049684_RABGAP1L	chr1	427.585		ENSGALT00000007287.4	chr8	7093243
AMEXTC_0340000085584_LOC108786287	chr1	427.585		ENSGALT00000007224.3	chr8	7053804
AMEXTC_0340000202345_ZBTB37	chr1	427.585		ENSGALT00000007316.3	chr8	7382137
AMEXTC_0340000206411_DARS2	chr1	427.585		ENSGALT00000005721.4	chr8	5536512
AMEXTC_0340000001288_RC3H1	chr1	427.585		ENSGALT00000007298.4	chr8	7324975
AMEXTC_0340000043486_TNR	chr1	429.713		ENSGALT00000007207.4	chr8	6987422
AMEXTC_0340000029521_PAPPA2	chr1	434.063		ENSGALT00000007146.4	chr8	6756097
AMEXTC_0340000025923_ASTN1	chr1	434.063		ENSGALT00000007121.4	chr8	6711186
AMEXTC_0340000214584_rasal2	chr1	436.191		ENSGALT00000006891.4	chr8	6430856
AMEXTC_0340000212461_LOC102454389	chr1	436.191		ENSGALT00000006927.4	chr8	6585941
AMEXTC_0340000030219_RALGPS2	chr1	436.191		ENSGALT00000006794.3	chr8	6281611
AMEXTC_0340000139872_fam20b	chr1	436.191		ENSGALT00000006730.1	chr8	6232351
AMEXTC_0340000005148_KLHL20	chr1	436.191		ENSGALT00000005555.4	chr8	5511292
AMEXTC_0340000208105_transcriptional	chr1	436.191		ENSGALT00000004839.4	chr8	4303064
AMEXTC_0340000139873_FAM20B	chr1	436.191		ENSGALT00000006730.1	chr8	6232351
AMEXTC_0340000040051_KIF14	chr1	438.319		ENSGALT00000003408.5	chr8	1448261
AMEXTC_0340000179400_DDX59	chr1	438.319		ENSGALT00000003389.3	chr8	1425196
AMEXTC_0340000014765_CAMSAP2	chr1	438.319		ENSGALT00000003364.4	chr8	1362790
AMEXTC_0340000050122_ARHGAP29	chr1	438.319		ENSGALT00000044091.1	chr8	12546366
AMEXTC_0340000059441_tissue	chr1	438.319		ENSGALT00000009017.4	chr8	12479131
AMEXTC_0340000050247_LOC108790013	chr1	438.319		ENSGALT00000003418.4	chr8	1585805
AMEXTC_0340000027585_PTPRC	chr1	440.447		ENSGALT00000003428.4	chr8	2019147
AMEXTC_0340000019702_nuf2.L	chr1	440.447		ENSGALT00000039783.2	chr8	5439984
AMEXTC_0340000003460_MYOC	chr1	440.447		ENSGALT00000033904.3	chr8	4707986
AMEXTC_0340000147461_ITPA	chr1	440.447		ENSGALT00000005139.3	chr8	4688298
AMEXTC_0340000060687_tmem56.S	chr1	440.447		ENSGALT00000008955.4	chr8	12291961
AMEXTC_0340000171666_DUSP12	chr1	442.554		ENSGALT00000011476.4	chr1	78613834
AMEXTC_0340000025293_OLFML2B	chr1	442.554		ENSGALT00000004201.4	chr8	3773061
AMEXTC_0340000210310_SEC22B	chr1	444.703		ENSGALT00000045229.1	chr8	4130592
AMEXTC_0340000014787_PRKAB2	chr1	444.703		ENSGALT00000002567.3	chr8	4269071
AMEXTC_0340000238518_SCYL3	chr1	444.703		ENSGALT00000005297.4	chr8	5042663
AMEXTC_0340000040461_KIFAP3	chr1	444.703		ENSGALT00000011640.4	chr8	4982259
AMEXTC_0340000021189_prrx1	chr1	444.703		ENSGALT00000005264.4	chr8	4818201
AMEXTC_0340000024053_B3GALT2	chr1	462.182		ENSGALT00000003906.1	chr8	3425682
AMEXTC_0340000026641_rgs13	chr1	462.182		ENSGALT00000045727.1	chr8	3585154
AMEXTC_0340000284702_influenza	chr1	462.182		ENSGALT00000008230.3	chr8	75791
AMEXTC_0340000215735_SWT1	chr1	462.182		ENSGALT00000008219.4	chr8	45362
AMEXTC_0340000250174_TPR	chr1	462.182		ENSGALT00000008185.4	chr8	9934044
AMEXTC_0340000010767_rgs2.L	chr1	462.182		ENSGALT00000004006.3	chr8	3555675
AMEXTC_0340000175653_HMCN1	chr1	462.182		ENSGALT00000008254.4	chr8	187562
AMEXTC_0340000223426_HMCN1	chr1	462.182		ENSGALT00000008254.4	chr8	187562
AMEXTC_0340000134508_HMCN1	chr1	462.182		ENSGALT00000008254.4	chr8	187562
AMEXTC_0340000132938_HMCN1	chr1	462.182		ENSGALT00000008254.4	chr8	187562
AMEXTC_0340000148924_HMCN1	chr1	462.182		ENSGALT00000008254.4	chr8	187562
AMEXTC_0340000013066_PTGS2	chr1	463.373		ENSGALT00000044290.1	chr8	9810425
AMEXTC_0340000267522_LAMC1	chr1	464.288		ENSGALT00000039414.2	chr8	7449295
AMEXTC_0340000054310_NCF2	chr1	464.288		ENSGALT00000007487.4	chr8	7594477
AMEXTC_0340000013888_SMG7	chr1	464.288		ENSGALT00000007437.4	chr8	7564280
AMEXTC_0340000024148_MSRB3	chr1	464.288		ENSGALT00000046186.1	chr1	33949838
AMEXTC_0340000047122_pla2g4a	chr1	464.288		ENSGALT00000008121.2	chr8	9703364
AMEXTC_0340000028766_RGS8	chr1	465.319		ENSGALT00000042774.1	chr8	5564249
AMEXTC_0340000205712_glul	chr1	465.319		ENSGALT00000013873.4	chr17	1933419
AMEXTC_0340000195008_znf91	chr1	465.319		ENSGALT00000046188.1	chrUn	269
AMEXTC_0340000007995_hypothetical	chr1	466.393		ENSGALT00000039677.2	chr8	5688262
AMEXTC_0340000030228_LOC102449075	chr1	470.744		ENSGALT00000003831.4	chr8	2641141
AMEXTC_0340000227232_ACBD6	chr1	470.744		ENSGALT00000006255.4	chr8	5890358
AMEXTC_0340000045501_XPR1	chr1	470.744		ENSGALT00000006190.4	chr8	5813032
AMEXTC_0340000064113_LOC104386128	chr1	470.744		ENSGALT00000006421.4	chr8	6070281
AMEXTC_0340000029400_ASPM	chr1	479.548		ENSGALT00000003688.5	chr8	2593759
AMEXTC_0340000058525_ZBTB41	chr1	479.548		ENSGALT00000003625.4	chr8	2576623
AMEXTC_0340000198671_DENND1B	chr1	479.548		ENSGALT00000001740.4	chr17	9023084
AMEXTC_0340000019446_LIM/homeobox	chr1	479.548		ENSGALT00000003480.3	chr8	2269655
AMEXTC_0340000252657_RWDD3	chr1	483.899		ENSGALT00000043277.1	chr8	12262145
AMEXTC_0340000057715_dpyd	chr1	483.899		ENSGALT00000008842.4	chr8	11522077
AMEXTC_0340000006992_PALMD	chr1	486.027		ENSGALT00000008738.4	chr8	11071106
AMEXTC_0340000238677_AGL	chr1	488.155		ENSGALT00000008683.4	chr8	11017202
AMEXTC_0340000158043_ADGRL2	chr1	490.283		ENSGALT00000014411.4	chr8	16333131
AMEXTC_0340000052186_LOC101482575	chr1	490.283		ENSGALT00000043862.1	chr8	15584074
AMEXTC_0340000041363_DNASE2B	chr1	490.283		ENSGALT00000014330.3	chr8	15543481
AMEXTC_0340000082578_SLC35A3	chr1	490.283		ENSGALT00000008565.4	chr8	10918534
AMEXTC_0340000209020_SASS6	chr1	490.283		ENSGALT00000008503.4	chr8	10883573
AMEXTC_0340000051589_COL11A1	chr1	490.283		ENSGALT00000008321.4	chr8	10153021
AMEXTC_0340000131899_TRMT13	chr1	490.283		ENSGALT00000008481.4	chr8	10877179
AMEXTC_0340000136967_DBT	chr1	490.283		ENSGALT00000008467.3	chr8	10851932
AMEXTC_0340000248993_RTCA	chr1	490.283		ENSGALT00000008464.3	chr8	10837703
AMEXTC_0340000037783_S1PR1	chr1	490.283		ENSGALT00000008363.4	chr8	10616089
AMEXTC_0340000221450_DPH5	chr1	490.283		ENSGALT00000008401.4	chr8	10666246
AMEXTC_0340000035317_slc30a7.L	chr1	490.283		ENSGALT00000033492.1	chr8	10689870
AMEXTC_0340000001729_NEXN	chr1	492.411		ENSGALT00000014545.5	chr8	17817584
AMEXTC_0340000036854_Fubp1	chr1	492.411		ENSGALT00000014525.4	chr8	17790798
AMEXTC_0340000005338_ak5	chr1	492.411		ENSGALT00000014654.4	chr8	17981315
AMEXTC_0340000257024_cysteine-rich	chr1	496.667		ENSGALT00000014106.3	chr8	15135793
AMEXTC_0340000042659_LOC100564731	chr1	496.667		ENSGALT00000011110.4	chr8	14987157
AMEXTC_0340000179166_tmcc3	chr1	507.714		ENSGALT00000018472.4	chr1	45037003
AMEXTC_0340000158657_CEP83	chr1	507.714		ENSGALT00000030640.3	chr1	45005909
AMEXTC_0340000036721_WDR63	chr1	507.714		ENSGALT00000014155.4	chr8	15286051
AMEXTC_0340000227567_SYDE2	chr1	507.714		ENSGALT00000014128.4	chr8	15253515
AMEXTC_0340000185927_bcl10	chr1	507.714		ENSGALT00000044967.1	chr8	15226512
AMEXTC_0340000132468_ctbs.L	chr1	507.714		ENSGALT00000014277.4	chr8	15487842
AMEXTC_0340000067987_vitellogenin	chr1	507.714		ENSGALT00000002892.3	chr8	15416742
AMEXTC_0340000003574_CLCC1	chr1	509.842		ENSGALT00000003286.4	chr8	1323057
AMEXTC_0340000291944_WDR47	chr1	509.842		ENSGALT00000003326.4	chr8	1339060
AMEXTC_0340000228367_CDC7	chr1	509.842		ENSGALT00000009749.3	chr8	13442244
AMEXTC_0340000131926_FNBP1L	chr1	509.842		ENSGALT00000009401.4	chr8	12812438
AMEXTC_0340000027634_BCAR3	chr1	509.842		ENSGALT00000009337.4	chr8	12762343
AMEXTC_0340000178005_prpf38b	chr1	509.842		ENSGALT00000003064.4	chr8	1242819
AMEXTC_0340000041054_LOC102685057	chr1	509.842		ENSGALT00000003088.4	chr8	1252808
AMEXTC_0340000031204_LOC102935576	chr1	509.842		ENSGALT00000003088.4	chr8	1252808
AMEXTC_0340000211086_STXBP3	chr1	509.842		ENSGALT00000003116.4	chr8	1264533
AMEXTC_0340000010147_CCDC18	chr1	509.842		ENSGALT00000009470.5	chr8	12894355
AMEXTC_0340000010147_CCDC18	chr1	509.842		ENSGALT00000009468.4	chr8	12898058
AMEXTC_0340000048829_KIAA1107	chr1	509.842		ENSGALT00000009612.4	chr8	13182561
AMEXTC_0340000139919_RPL5	chr1	509.842		ENSGALT00000009525.3	chr8	12994886
AMEXTC_0340000050546_Zfp326	chr1	509.842		ENSGALT00000009867.4	chr8	13897251
AMEXTC_0340000026499_LRRC8D	chr1	509.842		ENSGALT00000033345.1	chr8	13940034
AMEXTC_0340000157496_LRRC8C	chr1	509.842		ENSGALT00000009961.4	chr8	14012250
AMEXTC_0340000142932_transmembrane	chr1	509.842		ENSGALT00000009497.1	chr8	12925662
AMEXTC_0340000263262_LOC101936064	chr1	509.842		ENSGALT00000044847.1	chr27	4255936
AMEXTC_0340000044618_GPSM2	chr1	509.842		ENSGALT00000003258.4	chr8	1303356
AMEXTC_0340000042256_lrrc8b	chr1	509.842		ENSGALT00000009957.3	chr8	14043575
AMEXTC_0340000075792_VAV3	chr1	509.842		ENSGALT00000002946.4	chr8	987128
AMEXTC_0340000075792_VAV3	chr1	509.842		ENSGALT00000044918.1	chr8	988917
AMEXTC_0340000047831_Guanine	chr1	509.842		ENSGALT00000004255.4	chr17	7049743
AMEXTC_0340000001210_SLC25A24	chr1	509.842		ENSGALT00000003000.4	chr8	1182029
AMEXTC_0340000259166_RNPC3	chr1	525.659		ENSGALT00000008292.4	chr8	10022741
AMEXTC_0340000024746_RABGGTB	chr1	525.659		ENSGALT00000018575.4	chr8	28691553
AMEXTC_0340000180238_CRYZ	chr1	525.659		ENSGALT00000018533.3	chr8	28533244
AMEXTC_0340000291935_LRRC40	chr1	525.659		ENSGALT00000018434.3	chr8	27890884
AMEXTC_0340000181937_srsf11	chr1	525.659		ENSGALT00000018443.4	chr8	27913699
AMEXTC_0340000034351_slc35d1.L	chr1	527.787		ENSGALT00000018125.4	chr8	27518469
AMEXTC_0340000035115_PDE4B	chr1	527.787		ENSGALT00000023751.4	chrZ	18112316
AMEXTC_0340000195863_serbp1	chr1	527.787		ENSGALT00000018317.4	chr8	27570551
AMEXTC_0340000218324_LOC102929332	chr1	527.787		ENSGALT00000018364.4	chr8	27663633
AMEXTC_0340000158853_DEPDC1	chr1	527.787		ENSGALT00000018398.3	chr8	27684060
AMEXTC_0340000237866_SGIP1	chr1	527.787		ENSGALT00000018103.4	chr8	27431895
AMEXTC_0340000001132_JAK1	chr1	546.219		ENSGALT00000017969.4	chr8	27103614
AMEXTC_0340000045489_CACHD1	chr1	546.219		ENSGALT00000017959.4	chr8	26977491
AMEXTC_0340000024552_ROR1	chr1	546.219		ENSGALT00000017953.2	chr8	26884365
AMEXTC_0340000301253_psma4	chr1	548.347		ENSGALT00000004816.4	chr10	3146801
AMEXTC_0340000053991_LOC104912428	chr1	548.347		ENSGALT00000017753.4	chr8	25585365
AMEXTC_0340000046080_ANGPTL3	chr1	548.347		ENSGALT00000017884.4	chr8	26448476
AMEXTC_0340000186044_USP1	chr1	548.347		ENSGALT00000017833.4	chr8	26391540
AMEXTC_0340000034579_KANK4	chr1	548.347		ENSGALT00000017828.4	chr8	26365576
AMEXTC_0340000027260_PATJ	chr1	548.347		ENSGALT00000017789.4	chr8	26226027
AMEXTC_0340000148600_TM2D1	chr1	548.347		ENSGALT00000032964.3	chr8	26200324
AMEXTC_0340000174890_LOC104168799	chr1	548.347		ENSGALT00000017901.3	chr8	26691600
AMEXTC_0340000165985_LOC102352693	chr1	548.347		ENSGALT00000008716.4	chrZ	31576517
AMEXTC_0340000199542_FYB2	chr1	550.475		ENSGALT00000017622.4	chr8	24687127
AMEXTC_0340000039550_PRKAA2	chr1	550.475		ENSGALT00000017601.4	chr8	24663004
AMEXTC_0340000177244_Oma1	chr1	550.475		ENSGALT00000017659.4	chr8	25201609
AMEXTC_0340000172748_MYSM1	chr1	550.475		ENSGALT00000038040.1	chr8	25232687
AMEXTC_0340000060487_TMEM61	chr1	550.475		ENSGALT00000017563.4	chr8	24173995
AMEXTC_0340000025943_dhcr24	chr1	550.475		ENSGALT00000017560.4	chr8	24157605
AMEXTC_0340000228415_lexm	chr1	550.475		ENSGALT00000017549.3	chr8	24152395
AMEXTC_0340000028176_USP24	chr1	550.475		ENSGALT00000017568.4	chr8	24190572
AMEXTC_0340000199376_ACOT11	chr1	550.475		ENSGALT00000017540.4	chr8	24131386
AMEXTC_0340000159336_cpt2	chr1	551.242		ENSGALT00000038198.2	chr8	23532789
AMEXTC_0340000159336_cpt2	chr1	551.242		ENSGALT00000007108.4	chr17	5496165
AMEXTC_0340000214741_TAF1C	chr1	552.582		ENSGALT00000045097.1	chrZ	8946961
AMEXTC_0340000055099_acsbg2	chr1	552.582		ENSGALT00000002682.4	chr28	1630486
AMEXTC_0340000055099_acsbg2	chr1	552.582		ENSGALT00000045836.1	chr28	1633318
AMEXTC_0340000260607_LOC102944079	chr1	552.582		ENSGALT00000038220.2	chr8	23403974
AMEXTC_0340000061853_LOC110402521	chr1	552.582		ENSGALT00000017315.4	chr8	23406101
AMEXTC_0340000300860_echdc2	chr1	552.582		ENSGALT00000017321.4	chr8	23429039
AMEXTC_0340000154343_LRRC42	chr1	552.582		ENSGALT00000017480.3	chr8	24015719
AMEXTC_0340000065878_yipf1	chr1	552.582		ENSGALT00000017477.4	chr8	24001644
AMEXTC_0340000045468_TTC39A	chr1	552.582		ENSGALT00000017155.4	chr8	22914257
AMEXTC_0340000156012_BEND5	chr1	556.838		ENSGALT00000017109.4	chr8	21903168
AMEXTC_0340000037835_slc5a9	chr1	563.515		ENSGALT00000017089.4	chr8	21506672
AMEXTC_0340000168350_cytochrome	chr1	567.86		ENSGALT00000017050.4	chr8	20771031
AMEXTC_0340000015758_cmpk1	chr1	567.86		ENSGALT00000017068.2	chr8	20839281
AMEXTC_0340000045456_cytochrome	chr1	569.988		ENSGALT00000017045.4	chr8	20783470
AMEXTC_0340000232968_LOC101952194	chr1	569.988		ENSGALT00000017050.4	chr8	20771031
AMEXTC_0340000035359_cytochrome	chr1	569.988		ENSGALT00000017050.4	chr8	20771031
AMEXTC_0340000014886_MOB3C	chr1	569.988		ENSGALT00000045632.1	chr8	20726721
AMEXTC_0340000016306_EFCAB14	chr1	569.988		ENSGALT00000017008.4	chr8	20756678
AMEXTC_0340000064728_MKNK1	chr1	572.116		ENSGALT00000016998.4	chr8	20699729
AMEXTC_0340000141013_faah.1	chr1	574.244		ENSGALT00000016989.4	chr8	20529178
AMEXTC_0340000036492_LOC101934307	chr1	574.244		ENSGALT00000016989.4	chr8	20529178
AMEXTC_0340000010571_PIK3R3	chr1	580.909		ENSGALT00000023866.3	chr8	20334388
AMEXTC_0340000046757_MAST2	chr1	583.014		ENSGALT00000016788.4	chr8	20161457
AMEXTC_0340000156506_SLC6A9	chr1	587.27		ENSGALT00000038518.2	chr8	19282382
AMEXTC_0340000132334_DMAP1	chr1	589.398		ENSGALT00000016432.4	chr8	19322793
AMEXTC_0340000266513_PLK3	chr1	589.398		ENSGALT00000016472.4	chr8	19682158
AMEXTC_0340000131937_eri3	chr1	589.398		ENSGALT00000016435.4	chr8	19354569
AMEXTC_0340000157262_RNF220	chr1	589.398		ENSGALT00000033168.3	chr8	19579960
AMEXTC_0340000157262_RNF220	chr1	589.398		ENSGALT00000033170.3	chr8	19472400
AMEXTC_0340000182500_LOC110402634	chr1	591.526		ENSGALT00000016610.3	chr8	19826290
AMEXTC_0340000268472_EIF2B3	chr1	591.526		ENSGALT00000016488.4	chr8	19722266
AMEXTC_0340000025902_ptch2	chr1	591.526		ENSGALT00000016479.4	chr8	19696866
AMEXTC_0340000047892_IPP	chr1	593.654		ENSGALT00000016739.4	chr8	20127585
AMEXTC_0340000053823_TESK2	chr1	593.654		ENSGALT00000016630.4	chr8	19947563
AMEXTC_0340000060289_NASP	chr1	593.654		ENSGALT00000016679.4	chr8	20075621
AMEXTC_0340000156893_ST3GAL3	chr1	593.654		ENSGALT00000038548.2	chr8	19172175
AMEXTC_0340000202723_mutyh	chr1	593.654		ENSGALT00000016624.5	chr8	19932753
AMEXTC_0340000246449_AKR1A1	chr1	593.654		ENSGALT00000016649.3	chr8	20059936
AMEXTC_0340000244085_SZT2	chr1	595.782		ENSGALT00000044617.1	chr8	18617326
AMEXTC_0340000114416_elovl1.L	chr1	595.782		ENSGALT00000016231.4	chr8	18585119
AMEXTC_0340000269267_cdc20	chr1	595.782		ENSGALT00000016208.2	chr8	18577131
AMEXTC_0340000209234_PTPRF	chr1	595.782		ENSGALT00000016337.4	chr8	18794147
AMEXTC_0340000050923_LOC103281476	chr1	597.91		ENSGALT00000040211.2	chr18	15431
AMEXTC_0340000050923_LOC103281476	chr1	597.91		ENSGALT00000021794.4	chrLGE22C19W28	122074
AMEXTC_0340000050923_LOC103281476	chr1	597.91		ENSGALT00000021794.4	chrLGE22C19W28	122074
AMEXTC_0340000050923_LOC103281476	chr1	597.91		ENSGALT00000029406.3	chr2	350395
AMEXTC_0340000061079_LOC107539397	chr1	597.91		ENSGALT00000029406.3	chr2	350395
AMEXTC_0340000203709_LOC104552082	chr1	597.91		ENSGALT00000016619.2	chr1	37716013
AMEXTC_0340000216858_LOC107151831	chr2	2.128		ENSGALT00000029406.3	chr2	350395
AMEXTC_0340000216858_LOC107151831	chr2	2.128		ENSGALT00000007821.4	chr2	382546
AMEXTC_0340000183559_ZNF282	chr2	2.128		ENSGALT00000042642.1	chr2	549448
AMEXTC_0340000003032_STAB1	chr2	6.479		ENSGALT00000002333.3	chr12	590127
AMEXTC_0340000034187_STAB1	chr2	6.479		ENSGALT00000002333.3	chr12	590127
AMEXTC_0340000182042_NISCH	chr2	6.479		ENSGALT00000002271.4	chr12	545788
AMEXTC_0340000062033_STAB1	chr2	6.479		ENSGALT00000002333.3	chr12	590127
AMEXTC_0340000267527_GLT8D1	chr2	6.479		ENSGALT00000002508.3	chr12	738123
AMEXTC_0340000017349_PDZRN3	chr2	8.607		ENSGALT00000012692.4	chr12	16592805
AMEXTC_0340000301943_CCDC51	chr2	8.607		ENSGALT00000010440.4	chr12	11253812
AMEXTC_0340000064950_LOC108788226	chr2	8.607		ENSGALT00000036253.2	chr12	8921004
AMEXTC_0340000028963_LHFPL4	chr2	8.607		ENSGALT00000044671.1	chr12	11407843
AMEXTC_0340000016006_PLXNB1	chr2	8.607		ENSGALT00000010550.4	chr12	11277817
AMEXTC_0340000293917_LOC102936992	chr2	8.607		ENSGALT00000045345.1	chr3	75238659
AMEXTC_0340000045148_ALAS1	chr2	8.607		ENSGALT00000036281.2	chr12	2937526
AMEXTC_0340000279807_poc1a	chr2	8.607		ENSGALT00000002196.4	chr12	85232
AMEXTC_0340000159284_LOC100144966	chr2	8.607		ENSGALT00000013245.4	chr1	13626517
AMEXTC_0340000187296_IL17RC	chr2	12.862		ENSGALT00000045128.1	chrUn	20
AMEXTC_0340000185008_IL17RE	chr2	12.862		ENSGALT00000045627.1	chrUn	293
AMEXTC_0340000118507_ogg1	chr2	12.862		ENSGALT00000010758.4	chr12	11461613
AMEXTC_0340000154548_BRPF1	chr2	12.862		ENSGALT00000010726.4	chr12	11450644
AMEXTC_0340000221063_LOC108715886	chr2	14.99		ENSGALT00000039200.2	chr1	18948098
AMEXTC_0340000221023_QRICH1	chr2	14.99		ENSGALT00000011121.4	chr12	11587735
AMEXTC_0340000269349_impdh2	chr2	14.99		ENSGALT00000036237.2	chr12	11614723
AMEXTC_0340000057997_DALRD3	chr2	14.99		ENSGALT00000011224.4	chr12	11632153
AMEXTC_0340000031192_LOC108714679	chr2	14.99		ENSGALT00000013029.2	chr1	14518792
AMEXTC_0340000012797_slc6a8	chr2	14.99		ENSGALT00000045380.1	chr12	11575287
AMEXTC_0340000065635_ARIH2	chr2	14.99		ENSGALT00000044557.1	chr12	11652997
AMEXTC_0340000065635_ARIH2	chr2	14.99		ENSGALT00000011269.4	chr12	11655701
AMEXTC_0340000231786_USP19	chr2	14.99		ENSGALT00000011032.5	chr12	11558082
AMEXTC_0340000004428_lamb2	chr2	14.99		ENSGALT00000036239.2	chr12	11545870
AMEXTC_0340000049297_LOC101931205	chr2	14.99		ENSGALT00000011252.3	chr12	11647654
AMEXTC_0340000018381_IP6K2	chr2	19.341		ENSGALT00000009145.4	chr12	8964185
AMEXTC_0340000234468_NCKIPSD	chr2	23.692		ENSGALT00000009165.4	chr12	8976729
AMEXTC_0340000049601_CELSR3	chr2	23.692		ENSGALT00000009205.4	chr12	9012887
AMEXTC_0340000022484_COL7A1	chr2	23.692		ENSGALT00000009331.4	chr12	9064404
AMEXTC_0340000107377_HMCES	chr2	23.692		ENSGALT00000009490.1	chr12	9109926
AMEXTC_0340000260423_RAB7A	chr2	23.692		ENSGALT00000009495.4	chr12	9122967
AMEXTC_0340000240195_EEFSEC	chr2	25.82		ENSGALT00000009510.4	chr12	9379037
AMEXTC_0340000250129_SEC61A1	chr2	25.82		ENSGALT00000009591.4	chr12	9527459
AMEXTC_0340000250129_SEC61A1	chr2	25.82		ENSGALT00000022642.4	chr1	6167426
AMEXTC_0340000001191_MGLL	chr2	25.82		ENSGALT00000009633.4	chr12	9598735
AMEXTC_0340000152551_NCKAP1	chr2	25.82		ENSGALT00000004344.4	chr7	2220523
AMEXTC_0340000020074_PODXL2	chr2	25.82		ENSGALT00000036247.2	chr12	9689544
AMEXTC_0340000222668_MCM2	chr2	25.82		ENSGALT00000009723.3	chr12	9725751
AMEXTC_0340000248436_TPRA1	chr2	25.82		ENSGALT00000009740.2	chr12	9738593
AMEXTC_0340000052417_GATA2	chr2	25.82		ENSGALT00000030746.3	chr12	9185918
AMEXTC_0340000018336_LOC108714668	chr2	25.82		ENSGALT00000013522.3	chr1	12586974
AMEXTC_0340000051033_rpn1	chr2	25.82		ENSGALT00000009501.4	chr12	9149092
AMEXTC_0340000227884_plxna1	chr2	27.948		ENSGALT00000036246.2	chr12	9887587
AMEXTC_0340000054949_Solute	chr2	36.542		ENSGALT00000010080.4	chr12	10475438
AMEXTC_0340000042578_aldh1l1.L	chr2	36.542		ENSGALT00000045327.1	chr1	54456460
AMEXTC_0340000042578_aldh1l1.L	chr2	36.542		ENSGALT00000020714.4	chr1	54258882
AMEXTC_0340000039259_CHST13	chr2	36.542		ENSGALT00000010014.4	chr12	10449679
AMEXTC_0340000220994_ZXDC	chr2	36.542		ENSGALT00000010142.4	chr12	10656610
AMEXTC_0340000269295_UROC1	chr2	36.542		ENSGALT00000010196.4	chr12	10667218
AMEXTC_0340000079429_LOC100032537	chr2	36.542		ENSGALT00000010231.3	chr12	10756016
AMEXTC_0340000046116_TMEM43	chr2	36.542		ENSGALT00000010255.4	chr12	10764795
AMEXTC_0340000294843_txnrd3	chr2	36.542		ENSGALT00000009993.4	chr12	10366875
AMEXTC_0340000251051_sec13	chr2	38.67		ENSGALT00000013715.4	chr12	19436641
AMEXTC_0340000192586_GRIP2	chr2	38.67		ENSGALT00000010411.4	chr12	11006262
AMEXTC_0340000042360_hypothetical	chr2	38.67		ENSGALT00000033236.3	chr12	19501547
AMEXTC_0340000214680_PLXND1	chr2	38.67		ENSGALT00000013808.4	chr12	19511693
AMEXTC_0340000008818_SRGAP3	chr2	47.52		ENSGALT00000013650.4	chr12	19318976
AMEXTC_0340000023945_WNK2	chr2	78.28		ENSGALT00000008368.4	chr12	6453844
AMEXTC_0340000053381_SFMBT1	chr2	78.28		ENSGALT00000002691.3	chr12	842292
AMEXTC_0340000019567_ITIH4	chr2	78.28		ENSGALT00000002607.4	chr12	770512
AMEXTC_0340000010402_LOC101947815	chr2	78.28		ENSGALT00000002607.4	chr12	770512
AMEXTC_0340000025379_PHF2	chr2	78.28		ENSGALT00000008287.4	chr12	6282466
AMEXTC_0340000046628_PHF2	chr2	78.28		ENSGALT00000008287.4	chr12	6282466
AMEXTC_0340000187194_FAM120A	chr2	78.28		ENSGALT00000008313.4	chr12	6375303
AMEXTC_0340000016868_LRRN1	chr2	78.28		ENSGALT00000013472.4	chr12	18261477
AMEXTC_0340000025141_WNT7A	chr2	78.28		ENSGALT00000008229.4	chr12	6023839
AMEXTC_0340000185502_PFKFB4	chr2	78.28		ENSGALT00000003276.3	chr12	1359538
AMEXTC_0340000261156_LOC110195620	chr2	78.28		ENSGALT00000013807.4	chr17	2025622
AMEXTC_0340000261156_LOC110195620	chr2	78.28		ENSGALT00000040177.2	chr17	2047599
AMEXTC_0340000201535_CRBN	chr2	78.28		ENSGALT00000013466.4	chr12	18098443
AMEXTC_0340000171823_LOC102931631	chr2	78.28		ENSGALT00000004582.4	chr13	8670013
AMEXTC_0340000193073_rft1	chr2	78.28		ENSGALT00000003010.4	chr12	1197484
AMEXTC_0340000029275_CHL1	chr2	78.28		ENSGALT00000012841.4	chr12	17219614
AMEXTC_0340000062211_PRKCD	chr2	78.28		ENSGALT00000036292.2	chr12	1321864
AMEXTC_0340000123579_SUSD3	chr2	78.28		ENSGALT00000044454.1	chr12	6644908
AMEXTC_0340000180230_ACTR8	chr2	80.408		ENSGALT00000008651.4	chr12	7223207
AMEXTC_0340000048285_BICD2	chr2	80.408		ENSGALT00000008433.4	chr12	6815654
AMEXTC_0340000013813_ARHGEF3	chr2	82.514		ENSGALT00000008805.3	chr12	8419789
AMEXTC_0340000221828_FAM208A	chr2	82.514		ENSGALT00000008760.4	chr12	8385331
AMEXTC_0340000053122_CCDC66	chr2	82.514		ENSGALT00000008746.4	chr12	8366428
AMEXTC_0340000226053_hypothetical	chr2	82.514		ENSGALT00000008687.4	chr12	7892862
AMEXTC_0340000013144_MAGI1	chr2	84.642		ENSGALT00000012029.4	chr12	13983651
AMEXTC_0340000047736_DENND6A	chr2	84.642		ENSGALT00000009076.4	chr12	8722033
AMEXTC_0340000213170_arf4.S	chr2	84.642		ENSGALT00000039166.2	chr2	2357323
AMEXTC_0340000050721_PDE12	chr2	84.642		ENSGALT00000009018.4	chr12	8701128
AMEXTC_0340000213610_SLMAP	chr2	84.642		ENSGALT00000033710.3	chr12	8746152
AMEXTC_0340000189489_ADAMTS9	chr2	84.642		ENSGALT00000011955.4	chr12	13713808
AMEXTC_0340000026220_prickle2.S	chr2	84.642		ENSGALT00000011865.4	chr12	13616713
AMEXTC_0340000012223_CADPS	chr2	86.77		ENSGALT00000011770.4	chr12	13138123
AMEXTC_0340000200361_pdhb	chr2	91.026		ENSGALT00000011505.4	chr12	11808519
AMEXTC_0340000116433_KCTD6	chr2	91.026		ENSGALT00000011518.3	chr12	11813444
AMEXTC_0340000215979_ACOX2	chr2	91.026		ENSGALT00000011555.4	chr12	11822674
AMEXTC_0340000067213_FAM3D	chr2	91.026		ENSGALT00000014601.4	chr1	22980041
AMEXTC_0340000056500_LOC102450640	chr2	91.026		ENSGALT00000011609.4	chr12	11869222
AMEXTC_0340000228179_LRIG1	chr2	93.154		ENSGALT00000036226.2	chr12	14432244
AMEXTC_0340000006483_PXK	chr2	93.154		ENSGALT00000011423.4	chr12	11788844
AMEXTC_0340000250940_hypothetical	chr2	93.154		ENSGALT00000033434.3	chr12	11772249
AMEXTC_0340000229483_ABHD6	chr2	93.154		ENSGALT00000009138.4	chr12	8930168
AMEXTC_0340000034560_FLNB	chr2	93.154		ENSGALT00000036256.2	chr12	8851101
AMEXTC_0340000121599_LOC101950129	chr2	95.282		ENSGALT00000012287.3	chr12	14620836
AMEXTC_0340000046345_KBTBD8	chr2	95.282		ENSGALT00000012239.4	chr12	14599585
AMEXTC_0340000021862_MITF	chr2	99.538		ENSGALT00000012448.4	chr12	15538058
AMEXTC_0340000021862_MITF	chr2	99.538		ENSGALT00000046173.1	chr12	15468611
AMEXTC_0340000237301_FRMD4B	chr2	99.538		ENSGALT00000023578.4	chr12	15329788
AMEXTC_0340000039845_LOC108714721	chr2	99.538		ENSGALT00000029893.3	chr12	15318581
AMEXTC_0340000154988_TMF1	chr2	99.538		ENSGALT00000021867.4	chr12	15261644
AMEXTC_0340000022420_FOXP1	chr2	99.538		ENSGALT00000012606.3	chr12	15895825
AMEXTC_0340000064989_LOC103176720	chr2	101.666		ENSGALT00000018679.4	chr1	45661418
AMEXTC_0340000020454_ECM2	chr2	101.666		ENSGALT00000007480.4	chr12	3356079
AMEXTC_0340000165602_IPPK	chr2	101.666		ENSGALT00000007462.3	chr12	3309394
AMEXTC_0340000011941_OMD	chr2	103.794		ENSGALT00000045876.1	chr12	3409132
AMEXTC_0340000163743_NOL8	chr2	103.794		ENSGALT00000007571.4	chr12	3452726
AMEXTC_0340000042107_SLC6A1	chr2	103.794		ENSGALT00000007873.4	chr12	4229707
AMEXTC_0340000029770_SLC6A11	chr2	103.794		ENSGALT00000007788.4	chr12	4050595
AMEXTC_0340000020405_LOC104638150	chr2	103.794		ENSGALT00000007715.4	chr12	3713195
AMEXTC_0340000042648_aspn.L	chr2	103.794		ENSGALT00000007519.4	chr12	3382893
AMEXTC_0340000024267_EFCC1	chr2	108.144		ENSGALT00000036273.2	chr12	5135536
AMEXTC_0340000199181_LOC102935366	chr2	108.144		ENSGALT00000008043.4	chr12	5186795
AMEXTC_0340000054827_acad9.S	chr2	108.144		ENSGALT00000008070.4	chr12	5210372
AMEXTC_0340000045439_SYN2	chr2	108.144		ENSGALT00000007945.4	chr12	4654781
AMEXTC_0340000155586_MKRN2	chr2	108.144		ENSGALT00000007996.3	chr12	4929820
AMEXTC_0340000224778_ISY1	chr2	108.144		ENSGALT00000008027.4	chr12	5051629
AMEXTC_0340000158936_LOC101936505	chr2	108.144		ENSGALT00000008037.4	chr12	5064340
AMEXTC_0340000162712_RAB43	chr2	108.144		ENSGALT00000008038.4	chr12	5084355
AMEXTC_0340000116238_LOC102355690	chr2	108.144		ENSGALT00000008039.3	chr12	5105227
AMEXTC_0340000248302_dnah1	chr2	112.488		ENSGALT00000006843.5	chr12	3034083
AMEXTC_0340000149640_DNAH1	chr2	112.488		ENSGALT00000006843.5	chr12	3034083
AMEXTC_0340000120031_Fbln2	chr2	112.488		ENSGALT00000008222.4	chr12	5783473
AMEXTC_0340000237954_twf2	chr2	112.488		ENSGALT00000006336.4	chr12	2945887
AMEXTC_0340000169239_NUP210	chr2	112.488		ENSGALT00000008142.4	chr12	5607157
AMEXTC_0340000024516_acy1	chr2	114.616		ENSGALT00000045535.1	chr12	3126675
AMEXTC_0340000022152_SEMA3G	chr2	114.616		ENSGALT00000007127.3	chr12	3118856
AMEXTC_0340000208804_PARP3	chr2	116.744		ENSGALT00000007193.4	chr12	3142119
AMEXTC_0340000229577_NPRL2	chr2	116.744		ENSGALT00000003330.3	chr12	1432367
AMEXTC_0340000159671_CISH	chr2	123.42		ENSGALT00000003543.3	chr12	1831237
AMEXTC_0340000047057_CACNA2D2	chr2	123.42		ENSGALT00000042794.1	chr12	1440104
AMEXTC_0340000151531_LOC102347931	chr2	127.771		ENSGALT00000037547.1	chr1	60058081
AMEXTC_0340000151531_LOC102347931	chr2	127.771		ENSGALT00000021139.3	chr1	60057409
AMEXTC_0340000008876_DAG1	chr2	127.771		ENSGALT00000042864.1	chr12	2441414
AMEXTC_0340000044197_lgals4-a	chr2	129.899		ENSGALT00000023217.4	chr3	37061028
AMEXTC_0340000044197_lgals4-a	chr2	129.899		ENSGALT00000006738.4	chr3	37061028
AMEXTC_0340000261197_actn4	chr2	129.899		ENSGALT00000015425.4	chr5	27492490
AMEXTC_0340000237704_DCAF1	chr2	129.899		ENSGALT00000003776.4	chr12	2221687
AMEXTC_0340000211531_MANF	chr2	129.899		ENSGALT00000003723.4	chr12	2209955
AMEXTC_0340000031578_BSN	chr2	129.899		ENSGALT00000036284.2	chr12	2494175
AMEXTC_0340000048904_RINL	chr2	129.899		ENSGALT00000013781.4	chr3	4049967
AMEXTC_0340000176096_PAK4	chr2	129.899		ENSGALT00000023126.3	chrUn	39780
AMEXTC_0340000175123_HYAL2	chr2	129.899		ENSGALT00000003341.4	chr12	1408293
AMEXTC_0340000056116_RASSF1	chr2	129.899		ENSGALT00000001223.4	chr26	2438014
AMEXTC_0340000223100_SARS2	chr2	129.899		ENSGALT00000044717.1	chrUn	59886
AMEXTC_0340000188809_LOC109692687	chr2	129.899		ENSGALT00000036282.2	chr12	2598042
AMEXTC_0340000249362_LOC102352874	chr2	129.899		ENSGALT00000004397.4	chr12	2487789
AMEXTC_0340000095141_toll-like	chr2	129.899		ENSGALT00000036619.2	chr1	122856363
AMEXTC_0340000095141_toll-like	chr2	129.899		ENSGALT00000026777.2	chr1	122856249
AMEXTC_0340000028419_SLC38A3	chr2	129.899		ENSGALT00000043109.1	chr12	3204933
AMEXTC_0340000231764_SEMA3B	chr2	129.899		ENSGALT00000035861.3	chr12	3221939
AMEXTC_0340000007534_IP6K1	chr2	129.899		ENSGALT00000003959.4	chr12	2385931
AMEXTC_0340000144496_RBM5	chr2	129.899		ENSGALT00000007370.4	chr12	3145245
AMEXTC_0340000002650_rod	chr2	129.899		ENSGALT00000045180.1	chr12	3189382
AMEXTC_0340000162936_MST1R	chr2	129.899		ENSGALT00000036283.2	chr12	2579805
AMEXTC_0340000054094_LSU	chr2	129.899		ENSGALT00000042849.1	chrUn	20
AMEXTC_0340000054413_PAF1	chr2	132.027		ENSGALT00000044163.1	chrUn	14961
AMEXTC_0340000269268_LOC102350225	chr2	132.027		ENSGALT00000016269.3	chr3	26187338
AMEXTC_0340000036572_LRFN1	chr2	134.155		ENSGALT00000043292.1	chrUn	6866
AMEXTC_0340000199670_BICRA	chr2	136.262		ENSGALT00000045998.1	chrUn	20
AMEXTC_0340000058281_LOC100127267.L	chr2	136.262		ENSGALT00000016557.4	chr3	29680437
AMEXTC_0340000058281_LOC100127267.L	chr2	136.262		ENSGALT00000032636.3	chr5	24937024
AMEXTC_0340000156247_MGC83907	chr2	136.262		ENSGALT00000015838.5	chr5	29892118
AMEXTC_0340000015575_ryanodine	chr2	136.262		ENSGALT00000005352.4	chr5	29439523
AMEXTC_0340000046113_LOC102346949	chr2	136.262		ENSGALT00000020088.3	chr5	57678103
AMEXTC_0340000139942_eif3k.S	chr2	136.262		ENSGALT00000042863.1	chrUn	20
AMEXTC_0340000010169_CLIP3	chr2	136.262		ENSGALT00000014682.4	chr3	8368922
AMEXTC_0340000062670_LOC106557086	chr2	136.262		ENSGALT00000014672.4	chr5	24892869
AMEXTC_0340000200758_LOC102936453	chr2	136.262		ENSGALT00000046050.1	chr1	128042956
AMEXTC_0340000301920_SUPT5H	chr2	136.262		ENSGALT00000023124.4	chrUn	5781
AMEXTC_0340000005185_LOC108801799	chr2	145.378		ENSGALT00000027385.4	chr1	164871750
AMEXTC_0340000014632_LOC100498119	chr2	145.378		ENSGALT00000027385.4	chr1	164871750
AMEXTC_0340000217881_bckdha	chr2	145.378		ENSGALT00000026507.4	chr1	119705078
AMEXTC_0340000045286_CRX	chr2	145.378		ENSGALT00000044655.1	chr5	55680635
AMEXTC_0340000023441_SPRED3	chr2	145.378		ENSGALT00000014275.4	chr3	9931279
AMEXTC_0340000049268_cyp2g1p	chr2	145.378		ENSGALT00000009308.4	chr6	16736687
AMEXTC_0340000049268_cyp2g1p	chr2	145.378		ENSGALT00000040063.1	chr6	17129991
AMEXTC_0340000002098_EHD2	chr2	145.378		ENSGALT00000014784.2	chr3	7599402
AMEXTC_0340000130139_Hnrnpul1	chr2	145.378		ENSGALT00000043339.1	chrUn	20
AMEXTC_0340000202595_rab4b	chr2	147.506		ENSGALT00000018060.4	chr3	39293106
AMEXTC_0340000169013_ITPKC	chr2	147.506		ENSGALT00000014757.4	chr3	11880209
AMEXTC_0340000000141_hypothetical	chr2	147.506		ENSGALT00000040063.1	chr6	17129991
AMEXTC_0340000198004_MAP3K10	chr2	149.634		ENSGALT00000020003.5	chr5	26586980
AMEXTC_0340000049867_NUMBL	chr2	149.634		ENSGALT00000015137.4	chr5	25492779
AMEXTC_0340000017282_PRX	chr2	153.985		ENSGALT00000019108.4	chr5	51737894
AMEXTC_0340000020409_shkbp1.L	chr2	158.335		ENSGALT00000015752.4	chr3	20069948
AMEXTC_0340000043986_SPTBN4	chr2	158.335		ENSGALT00000013255.4	chr3	2626461
AMEXTC_0340000043986_SPTBN4	chr2	158.335		ENSGALT00000042830.1	chr3	2625284
AMEXTC_0340000016188_LOC108698608	chr2	158.335		ENSGALT00000017012.4	chr3	30485201
AMEXTC_0340000027616_LOC108698602	chr2	160.463		ENSGALT00000018181.4	chr5	48046013
AMEXTC_0340000168191_kcnk6.L	chr2	160.463		ENSGALT00000017920.3	chr3	38006260
AMEXTC_0340000145148_ZC3H4	chr2	162.591		ENSGALT00000013458.4	chr3	3165724
AMEXTC_0340000127172_LOC108645345	chr2	162.591		ENSGALT00000042727.1	chr5	54180
AMEXTC_0340000040625_PTGIR	chr2	166.847		ENSGALT00000023931.3	chrZ	12698105
AMEXTC_0340000204076_DACT3	chr2	166.847		ENSGALT00000019620.3	chr5	54991343
AMEXTC_0340000267540_PRKD2	chr2	166.847		ENSGALT00000016100.4	chr5	33101815
AMEXTC_0340000294776_strn4	chr2	166.847		ENSGALT00000016143.4	chr5	33543458
AMEXTC_0340000051673_LOC109913156	chr2	166.847		ENSGALT00000018286.4	chr5	48382975
AMEXTC_0340000009716_NCAM-180	chr2	168.986		ENSGALT00000012723.4	chr24	5806900
AMEXTC_0340000026861_TTC12	chr2	168.986		ENSGALT00000012709.4	chr24	5786864
AMEXTC_0340000162845_TTC12	chr2	168.986		ENSGALT00000012709.4	chr24	5786864
AMEXTC_0340000020249_dopamine	chr2	168.986		ENSGALT00000012639.4	chr24	5732694
AMEXTC_0340000180886_WDR62	chr2	168.986		ENSGALT00000014145.4	chr5	24330574
AMEXTC_0340000165410_LOC102352047	chr2	175.476		ENSGALT00000016512.4	chr5	36880150
AMEXTC_0340000169015_FAM46A	chr2	175.476		ENSGALT00000025577.4	chr3	77839635
AMEXTC_0340000263244_PRDM9	chr2	177.604		ENSGALT00000037547.1	chr1	60058081
AMEXTC_0340000263244_PRDM9	chr2	177.604		ENSGALT00000021794.4	chrLGE22C19W28	122074
AMEXTC_0340000263244_PRDM9	chr2	177.604		ENSGALT00000040211.2	chr18	15431
AMEXTC_0340000263244_PRDM9	chr2	177.604		ENSGALT00000040208.2	chr18	30333
AMEXTC_0340000263244_PRDM9	chr2	177.604		ENSGALT00000029406.3	chr2	350395
AMEXTC_0340000263244_PRDM9	chr2	177.604		ENSGALT00000046188.1	chrUn	269
AMEXTC_0340000263244_PRDM9	chr2	177.604		ENSGALT00000007821.4	chr2	382546
AMEXTC_0340000000584_DMPK	chr2	181.86		ENSGALT00000018644.4	chr5	49812776
AMEXTC_0340000120347_FOXA3	chr2	181.86		ENSGALT00000042667.1	chr10	4747882
AMEXTC_0340000022316_LOC103368325	chr2	181.86		ENSGALT00000031983.3	chr3	4299438
AMEXTC_0340000192435_MARK4	chr2	181.86		ENSGALT00000018759.4	chr5	50148549
AMEXTC_0340000053727_LOC101390241	chr2	183.988		ENSGALT00000017703.4	chr4	44658934
AMEXTC_0340000012590_LOC109921646	chr2	183.988		ENSGALT00000002535.4	chr3	15326573
AMEXTC_0340000251208_sptbn2	chr2	183.988		ENSGALT00000042830.1	chr3	2625284
AMEXTC_0340000251208_sptbn2	chr2	183.988		ENSGALT00000013255.4	chr3	2626461
AMEXTC_0340000250442_LOC109936340	chr2	183.988		ENSGALT00000031979.3	chr3	11272176
AMEXTC_0340000217961_LOC102937000	chr2	183.988		ENSGALT00000014757.4	chr3	11880209
AMEXTC_0340000298955_ATG2A	chr2	183.988		ENSGALT00000018063.5	chr5	45674495
AMEXTC_0340000135314_RBM4B	chr2	183.988		ENSGALT00000029963.3	chrUn	4928
AMEXTC_0340000223671_pc.2	chr2	183.988		ENSGALT00000033152.1	chr9	15864982
AMEXTC_0340000223671_pc.2	chr2	183.988		ENSGALT00000027260.4	chr1	143233042
AMEXTC_0340000007636_lrfn4.L	chr2	183.988		ENSGALT00000016331.4	chr3	27585424
AMEXTC_0340000004419_EML2	chr2	183.988		ENSGALT00000018246.4	chr5	48159647
AMEXTC_0340000180353_RECK	chr2	183.988		ENSGALT00000020610.4	chr2	56078970
AMEXTC_0340000187575_EHD1	chr2	183.988		ENSGALT00000014784.2	chr3	7599402
AMEXTC_0340000185707_LOC102933292	chr2	186.116		ENSGALT00000014514.3	chr3	8951134
AMEXTC_0340000026176_RELA	chr2	186.116		ENSGALT00000040305.2	chr3	2009614
AMEXTC_0340000301828_OVOL1	chr2	186.116		ENSGALT00000014161.4	chr3	14797099
AMEXTC_0340000063562_UGP2	chr2	188.244		ENSGALT00000014386.4	chr3	9438435
AMEXTC_0340000059940_LOC109922124	chr2	188.244		ENSGALT00000016537.4	chr3	29611731
AMEXTC_0340000214557_RAB1B	chr2	188.244		ENSGALT00000014281.4	chr3	9851202
AMEXTC_0340000010391_KLC2	chr2	188.244		ENSGALT00000031983.3	chr3	4299438
AMEXTC_0340000163447_NTPCR	chr2	188.244		ENSGALT00000017944.1	chr3	38333227
AMEXTC_0340000049896_SIPA1	chr2	188.244		ENSGALT00000017962.4	chr3	38475375
AMEXTC_0340000049896_SIPA1	chr2	188.244		ENSGALT00000015283.4	chr5	26239331
AMEXTC_0340000036170_SLC29A2	chr2	190.372		ENSGALT00000016551.4	chr3	29637258
AMEXTC_0340000170455_BRMS1	chr2	190.372		ENSGALT00000016417.3	chr5	35631292
AMEXTC_0340000061293_RIN2	chr2	190.372		ENSGALT00000013781.4	chr3	4049967
AMEXTC_0340000029733_GAL3ST3	chr2	190.372		ENSGALT00000010271.4	chr9	4256034
AMEXTC_0340000224201_capn1	chr2	192.5		ENSGALT00000016557.4	chr3	29680437
AMEXTC_0340000247207_DPF2	chr2	192.5		ENSGALT00000017826.3	chrUn	10726
AMEXTC_0340000231026_VPS51	chr2	192.5		ENSGALT00000040323.2	chr5	1649050
AMEXTC_0340000031576_NAALADL1	chr2	192.5		ENSGALT00000027854.4	chr1	186813785
AMEXTC_0340000148266_ACTR2	chr2	192.5		ENSGALT00000014276.4	chr3	9891301
AMEXTC_0340000036715_PELI3	chr2	192.5		ENSGALT00000039537.1	chr3	9521291
AMEXTC_0340000164947_DNA2	chr2	192.5		ENSGALT00000006429.4	chr6	10199220
AMEXTC_0340000015090_LOC100490266	chr2	192.5		ENSGALT00000002535.4	chr3	15326573
AMEXTC_0340000036517_CCDC85B	chr2	194.628		ENSGALT00000018168.4	chr5	47923515
AMEXTC_0340000048692_LTBP3	chr2	196.756		ENSGALT00000017012.4	chr3	30485201
AMEXTC_0340000020153_MAP4K2	chr2	196.756		ENSGALT00000020133.4	chr5	57691558
AMEXTC_0340000230479_PYGM	chr2	196.756		ENSGALT00000039933.2	chr3	4121557
AMEXTC_0340000238282_LOC103282338	chr2	196.756		ENSGALT00000016992.5	chr3	30420674
AMEXTC_0340000031444_FLRT1	chr2	203.233		ENSGALT00000014184.4	chr3	4603330
AMEXTC_0340000045708_FERMT3	chr2	203.233		ENSGALT00000020309.4	chr5	58152994
AMEXTC_0340000005577_LOC101937511	chr2	203.233		ENSGALT00000015927.4	chr3	20624529
AMEXTC_0340000217855_RPS6KA5	chr2	203.233		ENSGALT00000017399.3	chr5	43383873
AMEXTC_0340000054404_Foxn2	chr2	203.233		ENSGALT00000017352.4	chr5	42666772
AMEXTC_0340000167767_ESRRA	chr2	203.233		ENSGALT00000016888.4	chr5	37917632
AMEXTC_0340000249724_LOC102352268	chr2	203.233		ENSGALT00000031945.3	chr3	18692430
AMEXTC_0340000243771_LOC102366839	chr2	203.233		ENSGALT00000015897.4	chr3	20356019
AMEXTC_0340000237968_NAA40	chr2	203.233		ENSGALT00000021968.4	chrUn	2190
AMEXTC_0340000007721_NRXN2	chr2	203.233		ENSGALT00000014832.4	chr3	6450554
AMEXTC_0340000065689_nuclear	chr2	203.233		ENSGALT00000016005.4	chr5	31546120
AMEXTC_0340000065689_nuclear	chr2	203.233		ENSGALT00000018064.3	chr3	39337938
AMEXTC_0340000017090_LOC107292401	chr2	205.361		ENSGALT00000017407.3	chr3	34116277
AMEXTC_0340000239016_LOC102359903	chr2	207.489		ENSGALT00000045967.1	chr1	15932205
AMEXTC_0340000239016_LOC102359903	chr2	207.489		ENSGALT00000030740.3	chr1	15929585
AMEXTC_0340000145363_wdr45	chr2	207.489		ENSGALT00000002374.1	chr18	3365759
AMEXTC_0340000227835_AHNAK	chr2	207.489		ENSGALT00000044063.1	chrUn	20
AMEXTC_0340000122053_AHNAK	chr2	207.489		ENSGALT00000044063.1	chrUn	20
AMEXTC_0340000240538_PRICKLE3	chr2	207.489		ENSGALT00000011865.4	chr12	13616713
AMEXTC_0340000198971_LOC110089195	chr2	207.489		ENSGALT00000007488.3	chr17	5207120
AMEXTC_0340000227262_hypothetical	chr2	207.489		ENSGALT00000011888.4	chr2	14915680
AMEXTC_0340000019109_EML3	chr2	207.489		ENSGALT00000016124.4	chr3	22937488
AMEXTC_0340000000092_rom1	chr2	207.489		ENSGALT00000016117.2	chr3	22380706
AMEXTC_0340000240416_B3GAT3	chr2	207.489		ENSGALT00000025708.4	chr3	81940692
AMEXTC_0340000240416_B3GAT3	chr2	207.489		ENSGALT00000024318.4	chr1	80085284
AMEXTC_0340000042030_GANAB	chr2	207.489		ENSGALT00000014708.4	chr5	24915660
AMEXTC_0340000047647_iqsec2	chr2	207.489		ENSGALT00000008081.4	chr12	5245422
AMEXTC_0340000233543_HUWE1	chr2	209.617		ENSGALT00000005647.4	chr18	6886921
AMEXTC_0340000042533_fam120c	chr2	209.617		ENSGALT00000008313.4	chr12	6375303
AMEXTC_0340000027455_FGD1	chr2	209.617		ENSGALT00000021093.4	chr1	59115779
AMEXTC_0340000129028_deoxyribonuclease	chr2	211.745		ENSGALT00000029962.3	chr14	12316279
AMEXTC_0340000027275_ITIH6	chr2	211.745		ENSGALT00000045736.1	chrUn	5877
AMEXTC_0340000191685_alas2	chr2	211.745		ENSGALT00000036281.2	chr12	2937526
AMEXTC_0340000031904_PFKFB1	chr2	211.745		ENSGALT00000010225.4	chr1	3450217
AMEXTC_0340000246011_pkm	chr2	211.745		ENSGALT00000003100.3	chr10	1079351
AMEXTC_0340000246011_pkm	chr2	211.745		ENSGALT00000034751.3	chr10	1079289
AMEXTC_0340000062036_BGN	chr2	213.873		ENSGALT00000007519.4	chr12	3382893
AMEXTC_0340000058278_LOC108798378	chr2	213.873		ENSGALT00000007480.4	chr12	3356079
AMEXTC_0340000157537_SLC6A8	chr2	216.842		ENSGALT00000021197.3	chr1	60332192
AMEXTC_0340000157537_SLC6A8	chr2	216.842		ENSGALT00000010371.4	chr12	10950981
AMEXTC_0340000247999_plxnb3.S	chr2	218.107		ENSGALT00000010550.4	chr12	11277817
AMEXTC_0340000055683_idh3g	chr2	218.107		ENSGALT00000045085.1	chr4	10983
AMEXTC_0340000009592_Pdzd4	chr2	218.107		ENSGALT00000012692.4	chr12	16592805
AMEXTC_0340000031638_l1cam	chr2	218.107		ENSGALT00000015492.4	chr1	28525498
AMEXTC_0340000020582_ARHGAP4	chr2	220.235		ENSGALT00000015976.3	chr1	33468636
AMEXTC_0340000233564_tafazzin	chr2	220.235		ENSGALT00000045179.1	chrUn	3248
AMEXTC_0340000166195_LOC108698082	chr2	220.235		ENSGALT00000036246.2	chr12	9887587
AMEXTC_0340000266531_tktl2.L	chr2	220.235		ENSGALT00000008512.4	chr12	6937216
AMEXTC_0340000003132_flna	chr2	220.235		ENSGALT00000036256.2	chr12	8851101
AMEXTC_0340000053070_RPL10	chr2	220.235		ENSGALT00000046202.1	chrUn	6
AMEXTC_0340000269340_unnamed	chr2	224.586		ENSGALT00000034226.3	chr12	2838215
AMEXTC_0340000175177_UBA1	chr2	224.586		ENSGALT00000019202.4	chr4	51033944
AMEXTC_0340000218637_CCDC120	chr2	224.586		ENSGALT00000023578.4	chr12	15329788
AMEXTC_0340000001499_TNRC18	chr2	224.586		ENSGALT00000045202.1	chr18	9475286
AMEXTC_0340000057244_WIPI2	chr2	224.586		ENSGALT00000007252.4	chr14	4044370
AMEXTC_0340000001711_MMD2	chr2	224.586		ENSGALT00000007215.4	chr14	4031929
AMEXTC_0340000249078_RADIL	chr2	224.586		ENSGALT00000007176.3	chr14	4012960
AMEXTC_0340000222344_AP5Z1	chr2	224.586		ENSGALT00000007119.4	chr14	4001033
AMEXTC_0340000183489_PIM2	chr2	224.586		ENSGALT00000039200.2	chr1	18948098
AMEXTC_0340000214667_FBXL18	chr2	226.714		ENSGALT00000007337.2	chr14	4146429
AMEXTC_0340000117228_LOC101391786	chr2	228.842		ENSGALT00000045981.1	chr18	9470422
AMEXTC_0340000117228_LOC101391786	chr2	228.842		ENSGALT00000015673.4	chr14	4169149
AMEXTC_0340000117228_LOC101391786	chr2	228.842		ENSGALT00000039969.1	chr10	2014376
AMEXTC_0340000055421_cytoplasmic	chr2	228.842		ENSGALT00000045981.1	chr18	9470422
AMEXTC_0340000055421_cytoplasmic	chr2	228.842		ENSGALT00000015673.4	chr14	4169149
AMEXTC_0340000055421_cytoplasmic	chr2	228.842		ENSGALT00000039969.1	chr10	2014376
AMEXTC_0340000217064_FSCN1	chr2	228.842		ENSGALT00000034001.3	chr14	4184406
AMEXTC_0340000195265_RNF216	chr2	228.842		ENSGALT00000007374.4	chr14	4233130
AMEXTC_0340000023019_hypothetical	chr2	230.97		ENSGALT00000004658.4	chr14	322024
AMEXTC_0340000263234_CPPED1	chr2	230.97		ENSGALT00000004641.4	chr14	262294
AMEXTC_0340000204350_ARPC1B	chr2	230.97		ENSGALT00000007478.4	chr14	4361219
AMEXTC_0340000208113_hypothetical	chr2	230.97		ENSGALT00000040792.1	chr14	4343596
AMEXTC_0340000145612_kpna7.S	chr2	230.97		ENSGALT00000007433.4	chr14	4305857
AMEXTC_0340000027035_hypothetical	chr2	230.97		ENSGALT00000019266.4	chr4	51190836
AMEXTC_0340000027035_hypothetical	chr2	230.97		ENSGALT00000006673.4	chr7	5735049
AMEXTC_0340000012394_LMTK2	chr2	237.448		ENSGALT00000005507.4	chr14	1069026
AMEXTC_0340000181689_CDR2	chr2	237.448		ENSGALT00000046055.1	chr14	8694207
AMEXTC_0340000063174_LOC101932182	chr2	237.448		ENSGALT00000011375.4	chr14	8708455
AMEXTC_0340000143270_OTOA	chr2	237.448		ENSGALT00000011449.4	chr14	8746591
AMEXTC_0340000290162_KDELR2	chr2	237.448		ENSGALT00000011481.4	chr14	8783750
AMEXTC_0340000138491_arl6ip1	chr2	237.448		ENSGALT00000010969.4	chr14	8314003
AMEXTC_0340000187175_VWA3A	chr2	237.448		ENSGALT00000011270.4	chr14	8572310
AMEXTC_0340000182656_USP42	chr2	237.448		ENSGALT00000043676.1	chr18	10048425
AMEXTC_0340000241494_gspt1	chr2	237.448		ENSGALT00000041131.2	chr14	115568
AMEXTC_0340000000783_LOC109933425	chr2	237.448		ENSGALT00000019796.4	chr1	50264534
AMEXTC_0340000065945_Aimp2	chr2	237.448		ENSGALT00000005377.3	chr14	974576
AMEXTC_0340000017394_EEF2K	chr2	237.448		ENSGALT00000011312.4	chr14	8636415
AMEXTC_0340000004844_ALKBH5	chr2	239.576		ENSGALT00000007980.3	chr14	5030593
AMEXTC_0340000053318_gid4	chr2	239.576		ENSGALT00000007886.4	chr14	4986885
AMEXTC_0340000036908_TOM1L2	chr2	239.576		ENSGALT00000007838.4	chr14	4916966
AMEXTC_0340000159498_DACT1	chr2	239.576		ENSGALT00000019620.3	chr5	54991343
AMEXTC_0340000011470_LLGL1	chr2	239.576		ENSGALT00000023282.5	chr14	5050462
AMEXTC_0340000271047_FLII	chr2	239.576		ENSGALT00000040662.2	chr14	5061200
AMEXTC_0340000182949_TOP3A	chr2	239.576		ENSGALT00000008050.3	chr14	5075180
AMEXTC_0340000293218_SHMT1	chr2	239.576		ENSGALT00000008093.4	chr14	5095906
AMEXTC_0340000160329_RASD1	chr2	241.704		ENSGALT00000007764.3	chr14	4778982
AMEXTC_0340000176580_COPS3	chr2	243.832		ENSGALT00000007721.3	chr14	4738322
AMEXTC_0340000157279_FLCN	chr2	243.832		ENSGALT00000007690.4	chr14	4723398
AMEXTC_0340000025500_MPRIP	chr2	243.832		ENSGALT00000007656.4	chr14	4664203
AMEXTC_0340000191003_DHRS7B	chr2	259.344		ENSGALT00000007592.4	chr14	4530041
AMEXTC_0340000040829_kcnj12	chr2	262.206		ENSGALT00000007518.3	chr14	4438734
AMEXTC_0340000165924_ngfr	chr2	295.041		ENSGALT00000044863.1	chr27	3204182
AMEXTC_0340000018037_LOC108719793	chr2	323.964		ENSGALT00000039306.2	chr2	836596
AMEXTC_0340000181488_Dhx30	chr2	323.964		ENSGALT00000008045.4	chr2	708804
AMEXTC_0340000001220_MAP4	chr2	323.964		ENSGALT00000007904.4	chr2	677525
AMEXTC_0340000214416_LOC101601417	chr2	323.964		ENSGALT00000037547.1	chr1	60058081
AMEXTC_0340000214416_LOC101601417	chr2	323.964		ENSGALT00000021794.4	chrLGE22C19W28	122074
AMEXTC_0340000214416_LOC101601417	chr2	323.964		ENSGALT00000021139.3	chr1	60057409
AMEXTC_0340000214416_LOC101601417	chr2	323.964		ENSGALT00000007821.4	chr2	382546
AMEXTC_0340000157004_NBEAL2	chr2	323.964		ENSGALT00000008818.4	chr2	3841474
AMEXTC_0340000209916_NACAD	chr2	323.964		ENSGALT00000039068.2	chr2	4003121
AMEXTC_0340000247133_HSPA9	chr2	323.964		ENSGALT00000003725.2	chr13	2134784
AMEXTC_0340000039567_MYO1G	chr2	323.964		ENSGALT00000009051.4	chr2	4038248
AMEXTC_0340000196628_LOC101936582	chr2	323.964		ENSGALT00000000466.4	chrUn	4173
AMEXTC_0340000137795_aurkb.L	chr2	323.964		ENSGALT00000033524.3	chr20	12364934
AMEXTC_0340000154534_LOC101950183	chr2	323.964		ENSGALT00000040211.2	chr18	15431
AMEXTC_0340000154534_LOC101950183	chr2	323.964		ENSGALT00000021794.4	chrLGE22C19W28	122074
AMEXTC_0340000154534_LOC101950183	chr2	323.964		ENSGALT00000021794.4	chrLGE22C19W28	122074
AMEXTC_0340000154534_LOC101950183	chr2	323.964		ENSGALT00000029406.3	chr2	350395
AMEXTC_0340000154534_LOC101950183	chr2	323.964		ENSGALT00000029406.3	chr2	350395
AMEXTC_0340000154534_LOC101950183	chr2	323.964		ENSGALT00000007821.4	chr2	382546
AMEXTC_0340000154534_LOC101950183	chr2	323.964		ENSGALT00000007821.4	chr2	382546
AMEXTC_0340000162248_AXIN1	chr2	328.22		ENSGALT00000045356.1	chr14	12199022
AMEXTC_0340000057361_PDIA2	chr2	328.22		ENSGALT00000042936.1	chr14	12231748
AMEXTC_0340000069295_minor	chr2	328.22		ENSGALT00000039695.2	chr14	5124
AMEXTC_0340000070102_beta	chr2	328.22		ENSGALT00000036371.2	chr1	193720894
AMEXTC_0340000184702_eci1	chr2	328.22		ENSGALT00000012543.4	chr14	12305557
AMEXTC_0340000165772_DNAJA3	chr2	328.22		ENSGALT00000012696.4	chr14	12731018
AMEXTC_0340000174299_CREBBP	chr2	328.22		ENSGALT00000039566.2	chr14	12495127
AMEXTC_0340000039226_sept12	chr2	328.22		ENSGALT00000039459.2	chr14	13053796
AMEXTC_0340000063320_LOC108792455	chr2	328.22		ENSGALT00000029406.3	chr2	350395
AMEXTC_0340000053864_LOC104684927	chr2	328.22		ENSGALT00000003325.4	chr14	13303875
AMEXTC_0340000026147_PPL	chr2	328.22		ENSGALT00000003446.3	chr14	13254972
AMEXTC_0340000241639_iqca1	chr2	328.22		ENSGALT00000006341.4	chr7	5014358
AMEXTC_0340000024275_LOC101872464	chr2	328.22		ENSGALT00000043503.1	chr2	284907
AMEXTC_0340000030742_LOC101870270	chr2	328.22		ENSGALT00000015872.4	chr1	31675730
AMEXTC_0340000045937_LOC110159626	chr2	328.22		ENSGALT00000010093.4	chrLGE22C19W28	307166
AMEXTC_0340000036094_cdk5	chr2	328.22		ENSGALT00000044694.1	chrUn	468
AMEXTC_0340000212001_nos3	chr2	328.22		ENSGALT00000013295.2	chr15	11287022
AMEXTC_0340000046289_RHBDL1	chr2	328.22		ENSGALT00000045116.1	chr14	13136530
AMEXTC_0340000025319_E3	chr2	328.22		ENSGALT00000012315.4	chr14	12349366
AMEXTC_0340000015070_RBFOX1	chr2	328.22		ENSGALT00000011913.4	chr14	10846836
AMEXTC_0340000027487_LOC101950270	chr2	330.348		ENSGALT00000043077.1	chr14	12826394
AMEXTC_0340000017158_SLX4	chr2	330.348		ENSGALT00000046089.1	chr14	12438076
AMEXTC_0340000224424_TRAP1	chr2	330.348		ENSGALT00000012459.4	chr14	12473313
AMEXTC_0340000006233_LOC102574404	chr2	330.348		ENSGALT00000039543.2	chr14	12694314
AMEXTC_0340000026924_VASN	chr2	330.348		ENSGALT00000012664.4	chr14	12707720
AMEXTC_0340000175500_TFAP4	chr2	330.348		ENSGALT00000044955.1	chr14	12682510
AMEXTC_0340000012092_SRL	chr2	330.348		ENSGALT00000039553.2	chr14	12661874
AMEXTC_0340000227726_ASB8	chr2	332.476		ENSGALT00000021679.3	chrUn	34595
AMEXTC_0340000017383_ABCA3	chr2	332.476		ENSGALT00000003054.4	chr14	13567402
AMEXTC_0340000260777_TEDC2	chr2	332.476		ENSGALT00000014987.4	chr14	14229286
AMEXTC_0340000154687_HMOX2	chr2	332.476		ENSGALT00000012358.4	chr14	12422255
AMEXTC_0340000132638_NME4	chr2	332.476		ENSGALT00000004234.4	chr14	13001719
AMEXTC_0340000132638_NME4	chr2	332.476		ENSGALT00000046040.1	chr14	13223407
AMEXTC_0340000232634_DECR2	chr2	332.476		ENSGALT00000004228.4	chr14	13003753
AMEXTC_0340000021317_RAB11FIP3	chr2	332.476		ENSGALT00000004199.3	chr14	13010001
AMEXTC_0340000182814_CAPN15	chr2	332.476		ENSGALT00000003142.4	chr14	13435468
AMEXTC_0340000009162_LOC110086928	chr2	336.732		ENSGALT00000033182.3	chr14	14062584
AMEXTC_0340000021869_LOC101933514	chr2	336.732		ENSGALT00000045108.1	chr14	14014722
AMEXTC_0340000058435_LOC101951698	chr2	343.408		ENSGALT00000033176.3	chr14	13850268
AMEXTC_0340000267508_ATP6V0C	chr2	343.408		ENSGALT00000015018.4	chr14	13906678
AMEXTC_0340000224140_tbc1d24.1.L	chr2	343.408		ENSGALT00000015002.4	chr14	13928200
AMEXTC_0340000301506_TELO2	chr2	343.408		ENSGALT00000015124.4	chr14	13819523
AMEXTC_0340000003146_LOC105481505	chr2	343.408		ENSGALT00000015109.4	chr14	13835433
AMEXTC_0340000026338_GCC2	chr2	344.599		ENSGALT00000027129.4	chr1	135533886
AMEXTC_0340000017659_FBXL16	chr2	344.599		ENSGALT00000003851.4	chr14	13153662
AMEXTC_0340000234539_CCDC78	chr2	344.599		ENSGALT00000045501.1	chr14	13176208
AMEXTC_0340000061280_IGFALS	chr2	344.599		ENSGALT00000003657.4	chr14	13198608
AMEXTC_0340000019350_mapk8ip3	chr2	344.599		ENSGALT00000002721.4	chr14	14312671
AMEXTC_0340000180214_LOC100487982.L	chr2	344.599		ENSGALT00000015632.4	chr9	21872164
AMEXTC_0340000166534_LOC101931165	chr2	345.514		ENSGALT00000010888.4	chr14	7704304
AMEXTC_0340000002238_LOC104048564	chr2	356.758		ENSGALT00000007577.4	chr2	2080438
AMEXTC_0340000027841_LOC104500841	chr2	356.758		ENSGALT00000007577.4	chr2	2080438
AMEXTC_0340000146643_IBA57	chr2	356.758		ENSGALT00000008548.1	chr2	2295675
AMEXTC_0340000012227_LOC104044042	chr2	356.758		ENSGALT00000008796.4	chr2	3560823
AMEXTC_0340000009927_pth1r	chr2	356.758		ENSGALT00000008796.4	chr2	3560823
AMEXTC_0340000054701_LOC102349279	chr2	356.758		ENSGALT00000025544.4	chr3	76969136
AMEXTC_0340000008306_PDXDC1	chr2	377.596		ENSGALT00000004425.4	chr14	50224
AMEXTC_0340000062817_NTAN1	chr2	377.596		ENSGALT00000004474.4	chr14	72523
AMEXTC_0340000031126_TMC5	chr2	377.596		ENSGALT00000011200.4	chr14	8502403
AMEXTC_0340000016267_LOC101950450	chr2	377.596		ENSGALT00000010426.4	chr14	7468791
AMEXTC_0340000204086_MARF1	chr2	377.596		ENSGALT00000010464.4	chr14	7517490
AMEXTC_0340000018591_NDE1	chr2	377.596		ENSGALT00000010502.1	chr14	7542920
AMEXTC_0340000220768_MYH11	chr2	377.596		ENSGALT00000010534.4	chr14	7557637
AMEXTC_0340000271284_FOPNL	chr2	377.596		ENSGALT00000010556.3	chr14	7619678
AMEXTC_0340000165495_GDE1	chr2	377.596		ENSGALT00000039934.2	chr14	8516816
AMEXTC_0340000225100_COQ7	chr2	377.596		ENSGALT00000011107.4	chr14	8470599
AMEXTC_0340000243253_LOC108798328	chr2	377.596		ENSGALT00000010749.4	chr14	7628433
AMEXTC_0340000035467_gprc5b	chr2	380.502		ENSGALT00000003152.4	chr14	14687363
AMEXTC_0340000052548_GET4	chr2	386.34		ENSGALT00000006023.3	chr14	2177584
AMEXTC_0340000237159_acsm3	chr2	386.34		ENSGALT00000003444.4	chr14	14913150
AMEXTC_0340000009879_ZFAND2A	chr2	386.34		ENSGALT00000004936.4	chr14	2372452
AMEXTC_0340000077300_tsr3	chr2	386.34		ENSGALT00000010385.4	chr14	7407294
AMEXTC_0340000118255_pdilt	chr2	386.34		ENSGALT00000003124.4	chr14	14492085
AMEXTC_0340000009586_PRKAR1B	chr2	388.468		ENSGALT00000005824.3	chr14	2033022
AMEXTC_0340000000247_FAM20C	chr2	388.468		ENSGALT00000005765.4	chr14	1725487
AMEXTC_0340000201934_chtf18	chr2	388.468		ENSGALT00000008510.4	chr14	5970883
AMEXTC_0340000215514_LOC100158433.S	chr2	388.468		ENSGALT00000008482.4	chr14	5951622
AMEXTC_0340000187160_LMF1	chr2	388.468		ENSGALT00000008468.4	chr14	5758772
AMEXTC_0340000030088_SSTR5	chr2	388.468		ENSGALT00000008442.3	chr14	5610705
AMEXTC_0340000218693_RPUSD1	chr2	388.468		ENSGALT00000008518.4	chr14	5982461
AMEXTC_0340000038207_TEKT4	chr2	388.468		ENSGALT00000008429.4	chr14	5540770
AMEXTC_0340000088056_LOC105749768	chr2	388.468		ENSGALT00000005688.5	chr14	1318112
AMEXTC_0340000021228_LOC108701673	chr2	388.468		ENSGALT00000008577.4	chr14	5994337
AMEXTC_0340000145592_hagh.L	chr2	401.621		ENSGALT00000008671.4	chr14	6034217
AMEXTC_0340000231082_NARFL	chr2	401.621		ENSGALT00000008614.4	chr14	6016180
AMEXTC_0340000042516_rab26	chr2	408.298		ENSGALT00000040425.2	chr14	6386667
AMEXTC_0340000058951_LOC100489456	chr2	408.298		ENSGALT00000013089.4	chr5	21649226
AMEXTC_0340000163117_TSC2	chr2	408.298		ENSGALT00000009056.4	chr14	6259321
AMEXTC_0340000003602_SYNGR3	chr2	408.298		ENSGALT00000008969.4	chr14	6170642
AMEXTC_0340000249387_TBL3	chr2	408.298		ENSGALT00000008918.3	chr14	6136626
AMEXTC_0340000135282_rps2	chr2	408.298		ENSGALT00000008816.4	chr14	6132879
AMEXTC_0340000165438_lcmt1	chr2	410.426		ENSGALT00000033712.2	chr14	6602196
AMEXTC_0340000044897_GRID2IP	chr2	410.426		ENSGALT00000040390.2	chr14	6508653
AMEXTC_0340000156347_ZDHHC4	chr2	410.426		ENSGALT00000009498.3	chr14	6498474
AMEXTC_0340000205782_E4F1	chr2	410.426		ENSGALT00000009493.4	chr14	6489675
AMEXTC_0340000249051_LOC101932119	chr2	410.426		ENSGALT00000009423.3	chr14	6469557
AMEXTC_0340000040327_CASKIN1	chr2	410.426		ENSGALT00000009388.4	chr14	6438031
AMEXTC_0340000036543_CACNG3	chr2	412.554		ENSGALT00000046134.1	chr14	6742070
AMEXTC_0340000157997_TNRC6A	chr2	412.554		ENSGALT00000009788.4	chr14	6817681
AMEXTC_0340000056424_OLFM2	chr2	412.554		ENSGALT00000008354.4	chr8	10459332
AMEXTC_0340000130171_UBFD1	chr2	416.905		ENSGALT00000009871.4	chr14	6903247
AMEXTC_0340000002600_GGA2	chr2	419.033		ENSGALT00000045046.1	chr1	51039364
AMEXTC_0340000002600_GGA2	chr2	419.033		ENSGALT00000020313.4	chrUn	6974
AMEXTC_0340000002600_GGA2	chr2	419.033		ENSGALT00000044532.1	chr1	8248
AMEXTC_0340000057951_COG7	chr2	419.033		ENSGALT00000009940.3	chr14	6926149
AMEXTC_0340000037961_hs3st2	chr2	421.138		ENSGALT00000040258.2	chr14	7016035
AMEXTC_0340000172172_LOC102365177	chr2	427.522		ENSGALT00000013472.4	chr12	18261477
AMEXTC_0340000042079_CFP	chr2	427.522		ENSGALT00000015678.4	chr5	28899074
AMEXTC_0340000022148_SYN1	chr2	427.522		ENSGALT00000007945.4	chr12	4654781
AMEXTC_0340000204201_araf.L	chr2	427.522		ENSGALT00000033956.2	chr12	4943217
AMEXTC_0340000238509_usp11	chr2	427.522		ENSGALT00000015894.4	chr1	32863933
AMEXTC_0340000190494_cdk16	chr2	427.522		ENSGALT00000018679.4	chr1	45661418
AMEXTC_0340000209538_LOC102352461	chr2	427.522		ENSGALT00000005931.3	chr12	2795799
AMEXTC_0340000022287_AGR2	chr2	429.628		ENSGALT00000017599.4	chr2	28695780
AMEXTC_0340000152537_TIMM17B	chr2	429.628		ENSGALT00000000123.2	chr26	1094583
AMEXTC_0340000004384_LOC108788268	chr2	429.628		ENSGALT00000045436.1	chr12	14921471
AMEXTC_0340000179879_hdac6	chr2	429.628		ENSGALT00000014081.4	chr1	20110758
AMEXTC_0340000010627_LOC100563653	chr2	431.756		ENSGALT00000035543.2	chr12	2568475
AMEXTC_0340000001978_LOC107112842	chr2	431.756		ENSGALT00000013575.4	chr12	18847534
AMEXTC_0340000000952_MON1B	chr2	436.106		ENSGALT00000004608.4	chr12	2588482
AMEXTC_0340000037808_PTPN18	chr2	436.106		ENSGALT00000013546.4	chr1	12381898
AMEXTC_0340000225294_Tubulin	chr2	436.106		ENSGALT00000016997.4	chr9	23399167
AMEXTC_0340000041038_RBM10	chr2	436.106		ENSGALT00000007370.4	chr12	3145245
AMEXTC_0340000154678_LOC101945909	chr2	436.106		ENSGALT00000007060.4	chr14	3884371
AMEXTC_0340000242522_LOC101945909	chr2	436.106		ENSGALT00000007060.4	chr14	3884371
AMEXTC_0340000043349_ORF2	chr2	436.106		ENSGALT00000007060.4	chr14	3884371
AMEXTC_0340000228077_SDK1	chr2	436.106		ENSGALT00000007042.4	chr14	3522006
AMEXTC_0340000126408_SLC38A5	chr2	436.106		ENSGALT00000043109.1	chr12	3204933
AMEXTC_0340000193611_myosin	chr2	436.106		ENSGALT00000044266.1	chr18	350874
AMEXTC_0340000058397_myosin	chr2	436.106		ENSGALT00000044266.1	chr18	350874
AMEXTC_0340000058397_myosin	chr2	436.106		ENSGALT00000039878.2	chr18	433289
AMEXTC_0340000058397_myosin	chr2	436.106		ENSGALT00000001420.4	chr18	381894
AMEXTC_0340000058397_myosin	chr2	436.106		ENSGALT00000044534.1	chr18	584153
AMEXTC_0340000058397_myosin	chr2	436.106		ENSGALT00000001427.2	chr18	473712
AMEXTC_0340000036997_FTSJ1	chr2	436.106		ENSGALT00000040636.2	chr27	1690816
AMEXTC_0340000084801_LOC104124785	chr2	436.106		ENSGALT00000044266.1	chr18	350874
AMEXTC_0340000024262_wdr13	chr2	436.106		ENSGALT00000042850.1	chrUn	20
AMEXTC_0340000207671_IQCE	chr2	438.234		ENSGALT00000006902.4	chr14	3313952
AMEXTC_0340000043607_TTYH3	chr2	438.234		ENSGALT00000006863.4	chr14	3242658
AMEXTC_0340000190538_SNX8	chr2	439.383		ENSGALT00000006768.4	chr14	3084878
AMEXTC_0340000008939_VILL	chr2	440.34		ENSGALT00000009258.4	chr2	4562086
AMEXTC_0340000284728_LOC107591252	chr2	440.34		ENSGALT00000009135.4	chr2	4337074
AMEXTC_0340000021292_LOC109306583	chr2	440.34		ENSGALT00000009457.4	chr2	4706212
AMEXTC_0340000277567_C20H16orf52	chr2	440.34		ENSGALT00000011230.3	chr14	8544601
AMEXTC_0340000293229_LOC101935204	chr2	440.34		ENSGALT00000003923.4	chr14	15085439
AMEXTC_0340000011044_MGC85331	chr2	440.34		ENSGALT00000003915.4	chr14	15077347
AMEXTC_0340000183291_DNAH3	chr2	440.34		ENSGALT00000003708.4	chr14	14983211
AMEXTC_0340000165042_dnah3	chr2	440.34		ENSGALT00000003708.4	chr14	14983211
AMEXTC_0340000186949_LOC107131814	chr2	440.34		ENSGALT00000003708.4	chr14	14983211
AMEXTC_0340000216329_LOC103583514	chr2	440.34		ENSGALT00000003708.4	chr14	14983211
AMEXTC_0340000239110_DNAH3	chr2	440.34		ENSGALT00000003708.4	chr14	14983211
AMEXTC_0340000193560_DNAH3	chr2	440.34		ENSGALT00000003708.4	chr14	14983211
AMEXTC_0340000051766_nub1	chr2	440.34		ENSGALT00000038797.2	chr2	6187455
AMEXTC_0340000022574_CRYGN	chr2	440.34		ENSGALT00000009986.3	chr2	6235657
AMEXTC_0340000040279_ADCYAP1R1	chr2	440.34		ENSGALT00000008391.4	chr2	1340186
AMEXTC_0340000057470_INTS1	chr2	440.34		ENSGALT00000006529.4	chr14	2555734
AMEXTC_0340000219228_micall2	chr2	440.34		ENSGALT00000006473.4	chr14	2524723
AMEXTC_0340000017040_SELENON	chr2	440.34		ENSGALT00000001481.4	chr23	2237790
AMEXTC_0340000032779_UNCX	chr2	440.34		ENSGALT00000041002.2	chr14	2397871
AMEXTC_0340000030012_ACVR2B	chr2	442.468		ENSGALT00000009945.3	chr2	5721528
AMEXTC_0340000201206_CSRNP1	chr2	442.468		ENSGALT00000044280.1	chr2	5229743
AMEXTC_0340000174270_TTC21A	chr2	442.468		ENSGALT00000038446.2	chr7	19154459
AMEXTC_0340000153468_GORASP1	chr2	442.468		ENSGALT00000009713.3	chr2	5257024
AMEXTC_0340000237732_WDR48	chr2	442.468		ENSGALT00000031283.1	chr2	5265322
AMEXTC_0340000053672_scn5a	chr2	442.468		ENSGALT00000031281.3	chr2	5408260
AMEXTC_0340000229303_GAPDH	chr2	444.596		ENSGALT00000023323.4	chr1	76434646
AMEXTC_0340000216245_cry-dash.L	chr2	448.946		ENSGALT00000020627.4	chr1	53554187
AMEXTC_0340000019015_XIRP1	chr2	448.946		ENSGALT00000009698.4	chr2	4947533
AMEXTC_0340000019015_XIRP1	chr2	448.946		ENSGALT00000038916.2	chr2	4944067
AMEXTC_0340000019005_LOC108788787	chr2	448.946		ENSGALT00000024890.4	chr2	111724628
AMEXTC_0340000173320_BFAR	chr2	451.074		ENSGALT00000004911.4	chr14	826347
AMEXTC_0340000012695_CIITA	chr2	451.074		ENSGALT00000011613.2	chr14	9061601
AMEXTC_0340000157420_ZBTB47	chr2	451.074		ENSGALT00000008478.4	chr2	1978850
AMEXTC_0340000001089_PRKAG2	chr2	451.074		ENSGALT00000038780.2	chr2	6279661
AMEXTC_0340000001089_PRKAG2	chr2	451.074		ENSGALT00000010035.4	chr2	6279661
AMEXTC_0340000220972_RHEB	chr2	451.074		ENSGALT00000016139.2	chr1	35173229
AMEXTC_0340000036282_GRIN2A	chr2	455.418		ENSGALT00000011793.3	chr14	9244460
AMEXTC_0340000189546_Epithelial	chr2	455.418		ENSGALT00000042714.1	chr14	9182193
AMEXTC_0340000227209_c16orf72	chr2	462.094		ENSGALT00000039834.2	chr14	9852511
AMEXTC_0340000023330_NKTR	chr2	462.094		ENSGALT00000015998.4	chr2	1927421
AMEXTC_0340000064821_GALNT11	chr2	462.094		ENSGALT00000010074.3	chr2	6503695
AMEXTC_0340000017422_LOC104483667	chr2	462.094		ENSGALT00000010124.4	chr2	6528610
AMEXTC_0340000065690_LSU	chr2	462.094		ENSGALT00000039703.2	chr14	8016
AMEXTC_0340000072429_LSU	chr2	462.094		ENSGALT00000039715.2	chr14	12090644
AMEXTC_0340000072429_LSU	chr2	462.094		ENSGALT00000039712.2	chr14	7842
AMEXTC_0340000072429_LSU	chr2	462.094		ENSGALT00000012060.4	chr14	12090942
AMEXTC_0340000060286_Kmt2c	chr2	462.094		ENSGALT00000010124.4	chr2	6528610
AMEXTC_0340000083011_usp7	chr2	462.094		ENSGALT00000039801.2	chr14	9934514
AMEXTC_0340000251661_nom1.L	chr2	466.35		ENSGALT00000010388.4	chr2	8513774
AMEXTC_0340000039252_UBE3C	chr2	466.35		ENSGALT00000038686.2	chr2	8582313
AMEXTC_0340000263310_LMBR1	chr2	466.35		ENSGALT00000010331.4	chr2	8434743
AMEXTC_0340000058206_GTPBP4	chr2	468.478		ENSGALT00000010835.4	chr2	10356113
AMEXTC_0340000159621_ncapg2	chr2	468.478		ENSGALT00000010544.4	chr2	9417856
AMEXTC_0340000029300_ESYT2	chr2	468.478		ENSGALT00000019750.4	chr7	27789277
AMEXTC_0340000218047_WDR60	chr2	468.478		ENSGALT00000010589.4	chr2	9540586
AMEXTC_0340000204521_VIPR2	chr2	468.478		ENSGALT00000010623.3	chr2	9612722
AMEXTC_0340000020884_DIP2C	chr2	468.478		ENSGALT00000009909.4	chrLGE22C19W28	154786
AMEXTC_0340000191638_KLF6	chr2	472.829		ENSGALT00000011430.3	chr2	11735793
AMEXTC_0340000057276_PFKP	chr2	472.829		ENSGALT00000044180.1	chrUn	35181
AMEXTC_0340000212163_LOC101472402	chr2	472.829		ENSGALT00000044180.1	chrUn	35181
AMEXTC_0340000011097_FZD8	chr2	474.957		ENSGALT00000039687.1	chr15	3411517
AMEXTC_0340000011097_FZD8	chr2	474.957		ENSGALT00000035717.2	chr27	1515525
AMEXTC_0340000014404_NRP1	chr2	474.957		ENSGALT00000011564.4	chr2	13816139
AMEXTC_0340000248146_PARD3	chr2	474.957		ENSGALT00000011542.4	chr2	13068735
AMEXTC_0340000057412_MAP3K8	chr2	477.085		ENSGALT00000011897.4	chr2	14932502
AMEXTC_0340000214696_MTPAP	chr2	477.085		ENSGALT00000011888.4	chr2	14915680
AMEXTC_0340000029858_JCAD	chr2	477.085		ENSGALT00000011883.3	chr2	14820442
AMEXTC_0340000218689_ZNF438	chr2	477.085		ENSGALT00000011768.4	chr2	14511848
AMEXTC_0340000060000_LOC107584371	chr2	477.085		ENSGALT00000011863.4	chr2	14597994
AMEXTC_0340000230487_MPP7	chr2	479.213		ENSGALT00000011983.4	chr2	15410319
AMEXTC_0340000020316_armc4	chr2	479.213		ENSGALT00000011997.4	chr2	15517574
AMEXTC_0340000016330_MKX	chr2	479.213		ENSGALT00000012017.4	chr2	15606689
AMEXTC_0340000198368_PDSS1	chr2	479.213		ENSGALT00000012224.4	chr2	15977930
AMEXTC_0340000187921_abi1	chr2	479.213		ENSGALT00000014180.4	chr2	15897342
AMEXTC_0340000062983_MASTL	chr2	479.213		ENSGALT00000012133.4	chr2	15830068
AMEXTC_0340000269280_BAMBI	chr2	479.213		ENSGALT00000044192.1	chr2	15230157
AMEXTC_0340000241592_PPP6R2	chr2	483.484		ENSGALT00000021988.4	chr1	460367
AMEXTC_0340000196622_DENND6B	chr2	483.484		ENSGALT00000022367.4	chr1	436356
AMEXTC_0340000136848_CALU	chr2	483.484		ENSGALT00000040104.2	chr5	5240085
AMEXTC_0340000018585_LOC102945948	chr2	488.188		ENSGALT00000031243.3	chr2	16105775
AMEXTC_0340000030810_KIAA1217	chr2	490.316		ENSGALT00000012598.4	chr2	16817532
AMEXTC_0340000006572_ARHGAP21	chr2	490.316		ENSGALT00000044603.1	chr2	16733684
AMEXTC_0340000006572_ARHGAP21	chr2	490.316		ENSGALT00000012520.4	chr2	16677324
AMEXTC_0340000183708_LOC104689224	chr2	490.316		ENSGALT00000044993.1	chr2	17614780
AMEXTC_0340000250619_ENKUR	chr2	490.316		ENSGALT00000012450.4	chr2	16613395
AMEXTC_0340000183319_prtfdc1.L	chr2	490.316		ENSGALT00000012469.4	chr2	16631917
AMEXTC_0340000207688_PTF1A	chr2	490.316		ENSGALT00000043857.1	chr2	17298876
AMEXTC_0340000137806_OTUD1	chr2	490.316		ENSGALT00000044887.1	chr2	17237192
AMEXTC_0340000054698_DFNA5	chr2	491.656		ENSGALT00000043630.1	chr2	31737211
AMEXTC_0340000054698_DFNA5	chr2	491.656		ENSGALT00000017908.3	chr2	31739789
AMEXTC_0340000017616_HoxA13	chr2	492.423		ENSGALT00000045573.1	chr2	33006614
AMEXTC_0340000017616_HoxA13	chr2	492.423		ENSGALT00000045192.1	chr2	32893987
AMEXTC_0340000017616_HoxA13	chr2	492.423		ENSGALT00000037816.2	chr2	33187584
AMEXTC_0340000070499_HoxA11	chr2	492.423		ENSGALT00000045349.1	chr2	32876473
AMEXTC_0340000070499_HoxA11	chr2	492.423		ENSGALT00000037819.3	chr2	32877277
AMEXTC_0340000070499_HoxA11	chr2	492.423		ENSGALT00000037817.2	chr2	32991381
AMEXTC_0340000070499_HoxA11	chr2	492.423		ENSGALT00000018032.4	chr2	33172152
AMEXTC_0340000070500_HOXA10	chr2	492.423		ENSGALT00000018031.4	chr2	32867059
AMEXTC_0340000070500_HOXA10	chr2	492.423		ENSGALT00000037820.2	chr2	32979822
AMEXTC_0340000031158_HoxA9	chr2	492.423		ENSGALT00000018034.4	chr2	33152459
AMEXTC_0340000031158_HoxA9	chr2	492.423		ENSGALT00000019407.4	chr2	32971635
AMEXTC_0340000031158_HoxA9	chr2	492.423		ENSGALT00000018035.4	chr2	32857619
AMEXTC_0340000014406_HOXA7	chr2	492.423		ENSGALT00000046237.1	chr2	32962991
AMEXTC_0340000014406_HOXA7	chr2	492.423		ENSGALT00000042733.1	chr2	32848678
AMEXTC_0340000014406_HOXA7	chr2	492.423		ENSGALT00000018013.4	chr2	33143656
HOXA6	chr2	492.423		ENSGALT00000044589.1	chr2	32953574
HOXA6	chr2	492.423		ENSGALT00000043274.1	chr2	32840811
HOXA6	chr2	492.423		ENSGALT00000018011.4	chr2	33135116
AMEXTC_0340000021890_HOXA4	chr2	492.423		ENSGALT00000038691.2	chr7	15777578
AMEXTC_0340000021890_HOXA4	chr2	492.423		ENSGALT00000029853.3	chr2	32824508
AMEXTC_0340000021890_HOXA4	chr2	492.423		ENSGALT00000018006.3	chr2	32823689
AMEXTC_0340000060719_HOXA3	chr2	492.423		ENSGALT00000045994.1	chr2	32803523
AMEXTC_0340000060719_HOXA3	chr2	492.423		ENSGALT00000018005.4	chr2	32917210
AMEXTC_0340000052817_SKAP2	chr2	492.423		ENSGALT00000017999.4	chr2	32527253
AMEXTC_0340000146652_cbx3.S	chr2	492.423		ENSGALT00000017979.3	chr2	32327993
AMEXTC_0340000207272_SNX10	chr2	492.423		ENSGALT00000017994.2	chr2	32350695
AMEXTC_0340000138369_TAX1BP1	chr2	496.773		ENSGALT00000018131.4	chr2	33446115
AMEXTC_0340000049255_JAZF1	chr2	498.901		ENSGALT00000018137.4	chr2	33497259
AMEXTC_0340000166091_CREB5	chr2	498.901		ENSGALT00000018161.3	chr2	33741965
AMEXTC_0340000020334_DNAH11	chr2	505.578		ENSGALT00000011513.4	chr18	10070950
AMEXTC_0340000019699_dnah11	chr2	505.578		ENSGALT00000011513.4	chr18	10070950
AMEXTC_0340000017583_RAPGEF5	chr2	505.578		ENSGALT00000017745.4	chr2	30757165
AMEXTC_0340000036051_MYRIP	chr2	512.254		ENSGALT00000037574.2	chr2	44581824
AMEXTC_0340000218656_KIAA1143	chr2	512.254		ENSGALT00000019426.2	chr2	43804782
AMEXTC_0340000032253_epidermal	chr2	512.254		ENSGALT00000037413.2	chr2	52411117
AMEXTC_0340000032253_epidermal	chr2	512.254		ENSGALT00000020192.4	chr2	52415815
AMEXTC_0340000019036_TRAK1	chr2	512.254		ENSGALT00000019473.4	chr2	44326507
AMEXTC_0340000014822_TRAK1	chr2	512.254		ENSGALT00000019473.4	chr2	44326507
AMEXTC_0340000102609_LOC104357900	chr2	512.254		ENSGALT00000019473.4	chr2	44326507
AMEXTC_0340000192347_CTNNB1	chr2	512.254		ENSGALT00000019428.3	chr2	44026722
AMEXTC_0340000055952_TPK1	chr2	516.605		ENSGALT00000020200.4	chr2	52757782
AMEXTC_0340000228986_EXOSC7	chr2	518.733		ENSGALT00000019392.3	chr2	43691239
AMEXTC_0340000042282_ZDHHC3	chr2	518.733		ENSGALT00000019393.4	chr2	43720851
AMEXTC_0340000055937_gpnmb	chr2	518.733		ENSGALT00000017821.4	chr2	31263757
AMEXTC_0340000189869_LOC104386417	chr2	518.733		ENSGALT00000020230.3	chr2	53983168
AMEXTC_0340000032192_hyccin	chr2	519.626		ENSGALT00000017774.3	chr2	31027824
AMEXTC_0340000133889_STAM	chr2	520.839		ENSGALT00000014097.4	chr2	19520143
AMEXTC_0340000045021_HACD1	chr2	520.839		ENSGALT00000019131.4	chr7	26653370
AMEXTC_0340000217433_TRDMT1	chr2	522.967		ENSGALT00000014137.4	chr2	19698520
AMEXTC_0340000030169_CUBN	chr2	522.967		ENSGALT00000014166.4	chr2	19737379
AMEXTC_0340000149772_GTPBP10	chr2	525.095		ENSGALT00000014705.3	chr2	21600606
AMEXTC_0340000023623_ITGA8	chr2	529.445		ENSGALT00000014236.5	chr2	20218012
AMEXTC_0340000054001_FAM171A1	chr2	529.445		ENSGALT00000014256.4	chr2	20374797
AMEXTC_0340000146450_MINDY3	chr2	533.796		ENSGALT00000014221.3	chr2	20165198
AMEXTC_0340000058285_STEAP4	chr2	535.903		ENSGALT00000014634.4	chr2	20889644
AMEXTC_0340000242212_CDK14	chr2	535.903		ENSGALT00000014750.4	chr2	21670335
AMEXTC_0340000194136_AKAP9	chr2	540.231		ENSGALT00000015176.4	chr2	22520593
AMEXTC_0340000207903_mterf1	chr2	540.231		ENSGALT00000020628.4	chr1	53593806
AMEXTC_0340000232555_LOC102456845	chr2	540.252		ENSGALT00000015498.4	chr2	23437563
AMEXTC_0340000183323_ANKIB1	chr2	540.252		ENSGALT00000015304.4	chr2	22658895
AMEXTC_0340000212993_HEPACAM2	chr2	540.252		ENSGALT00000038130.2	chr2	23053746
AMEXTC_0340000222745_VPS50	chr2	540.252		ENSGALT00000038112.2	chr2	23077843
AMEXTC_0340000204892_LOC108799558	chr2	540.252		ENSGALT00000017732.4	chr2	30202574
AMEXTC_0340000012627_ITGB8	chr2	540.252		ENSGALT00000017677.4	chr2	30127825
AMEXTC_0340000035531_efcab1	chr2	540.252		ENSGALT00000015413.3	chr2	22801430
AMEXTC_0340000012795_tfpi2	chr2	540.252		ENSGALT00000015485.4	chr2	23431044
AMEXTC_0340000027663_PPP1R9A	chr2	542.38		ENSGALT00000015764.3	chr2	23846202
AMEXTC_0340000058967_LOC108498692	chr2	542.38		ENSGALT00000038023.2	chr2	23977866
AMEXTC_0340000058967_LOC108498692	chr2	542.38		ENSGALT00000015769.3	chr2	23980339
AMEXTC_0340000053074_PDK4	chr2	542.38		ENSGALT00000015790.4	chr2	24033199
AMEXTC_0340000210163_SNX13	chr2	542.38		ENSGALT00000037907.2	chr2	29098341
AMEXTC_0340000210163_SNX13	chr2	542.38		ENSGALT00000017621.4	chr2	29098202
AMEXTC_0340000044826_SNX13	chr2	542.38		ENSGALT00000017621.4	chr2	29098202
AMEXTC_0340000044826_SNX13	chr2	542.38		ENSGALT00000037907.2	chr2	29098341
AMEXTC_0340000216620_FERD3L	chr2	542.38		ENSGALT00000017660.2	chr2	29716674
AMEXTC_0340000230272_TNKS2	chr2	544.508		ENSGALT00000023563.4	chr6	19439616
AMEXTC_0340000011741_CACNB2	chr2	546.636		ENSGALT00000013988.3	chr2	19003859
AMEXTC_0340000002373_SLC39A12	chr2	546.636		ENSGALT00000014008.4	chr2	19249638
AMEXTC_0340000023242_collagen	chr2	546.636		ENSGALT00000015703.4	chr2	23702023
AMEXTC_0340000013970_ETV1	chr2	549.881		ENSGALT00000031204.3	chr2	27405081
AMEXTC_0340000015593_LOC108718485	chr2	550.869		ENSGALT00000017542.4	chr2	27518561
AMEXTC_0340000021315_MEOX2	chr2	550.869		ENSGALT00000017555.2	chr2	28171683
AMEXTC_0340000036377_SYF2	chr2	550.869		ENSGALT00000001893.4	chr23	2361271
AMEXTC_0340000008768_sostdc1	chr2	550.869		ENSGALT00000043046.1	chr2	28529556
AMEXTC_0340000008768_sostdc1	chr2	550.869		ENSGALT00000017559.3	chr2	28532373
AMEXTC_0340000039115_VWDE	chr2	550.869		ENSGALT00000020216.4	chr7	31068983
AMEXTC_0340000057533_ARL4A	chr2	550.869		ENSGALT00000043011.1	chr2	26933503
AMEXTC_0340000020161_phf14.L	chr2	552.997		ENSGALT00000017434.4	chr2	26168483
AMEXTC_0340000007288_THSD7A	chr2	552.997		ENSGALT00000017442.4	chr2	26394646
AMEXTC_0340000019670_NHSL2	chr2	555.125		ENSGALT00000044520.1	chr4	1656179
AMEXTC_0340000027333_ERCC6L	chr2	555.125		ENSGALT00000006172.3	chr4	1647893
AMEXTC_0340000173879_ERCC6L	chr2	555.125		ENSGALT00000006172.3	chr4	1647893
AMEXTC_0340000169988_SHROOM4	chr2	555.125		ENSGALT00000026815.4	chr1	124420460
AMEXTC_0340000161358_PHKA1	chr2	555.125		ENSGALT00000007663.4	chr4	1841835
AMEXTC_0340000060912_DBF4B	chr2	555.125		ENSGALT00000007717.3	chr4	1867723
AMEXTC_0340000033741_LOC102356032	chr2	557.253		ENSGALT00000015011.4	chr7	15181595
AMEXTC_0340000246382_UBA5	chr2	557.253		ENSGALT00000019134.4	chr2	42916020
AMEXTC_0340000043253_KLF8	chr2	557.253		ENSGALT00000000505.4	chr4	11423396
AMEXTC_0340000038009_DGKK	chr2	557.253		ENSGALT00000006097.4	chr4	1816320
AMEXTC_0340000212179_DNAJC13	chr2	559.381		ENSGALT00000019087.4	chr2	42832429
AMEXTC_0340000130060_TOPBP1	chr2	559.381		ENSGALT00000019158.5	chr2	43230981
AMEXTC_0340000271061_mrpl3	chr2	572.646		ENSGALT00000018940.4	chr2	42466007
AMEXTC_0340000227002_PIK3R4	chr2	572.646		ENSGALT00000037642.2	chr2	42194623
AMEXTC_0340000173379_ATP2C1	chr2	572.646		ENSGALT00000018903.4	chr2	42276961
AMEXTC_0340000159625_ASTE1	chr2	572.646		ENSGALT00000018930.4	chr2	42311906
AMEXTC_0340000155877_CMSS1	chr2	572.646		ENSGALT00000024644.4	chr1	83998000
AMEXTC_0340000005238_LOC100486063	chr2	574.774		ENSGALT00000018866.4	chr2	42137314
AMEXTC_0340000190435_NOD1	chr2	580.788		ENSGALT00000018808.4	chr2	41819533
AMEXTC_0340000009509_capn7	chr2	580.788		ENSGALT00000018846.4	chr2	42079027
AMEXTC_0340000191516_OXSM	chr2	583.529		ENSGALT00000018456.4	chr2	38518530
AMEXTC_0340000142713_ngly1	chr2	583.529		ENSGALT00000018440.3	chr2	38497011
AMEXTC_0340000155185_SLC4A7	chr2	583.529		ENSGALT00000018603.4	chr2	39023044
AMEXTC_0340000218664_CpEomesodermin	chr2	583.529		ENSGALT00000042658.1	chr2	39178221
AMEXTC_0340000031036_RBMS3	chr2	586.678		ENSGALT00000018146.3	chr7	21176599
AMEXTC_0340000213596_gpd1l	chr2	596.461		ENSGALT00000018718.4	chr2	40901332
AMEXTC_0340000230707_TRIM71	chr2	596.461		ENSGALT00000031151.2	chr2	41117520
AMEXTC_0340000059941_ABHD5	chr2	596.461		ENSGALT00000031147.3	chr2	41434127
AMEXTC_0340000181714_ube2e1	chr2	596.461		ENSGALT00000033324.3	chr7	14019119
AMEXTC_0340000035824_LOC108719958	chr2	598.589		ENSGALT00000018432.3	chr2	38420563
AMEXTC_0340000040189_ZNF385D	chr2	598.589		ENSGALT00000018407.4	chr2	36832211
AMEXTC_0340000233242_LOC104267732	chr2	598.589		ENSGALT00000018402.4	chr2	36428841
AMEXTC_0340000233697_thyroid	chr2	598.589		ENSGALT00000031162.2	chr2	37844467
AMEXTC_0340000233697_thyroid	chr2	598.589		ENSGALT00000018423.4	chr2	37844736
AMEXTC_0340000233697_thyroid	chr2	598.589		ENSGALT00000018424.4	chr2	37844467
AMEXTC_0340000030118_SNRK	chr2	598.589		ENSGALT00000018780.4	chr2	41602629
AMEXTC_0340000038139_PLCL2	chr2	605.068		ENSGALT00000018348.4	chr2	35030728
AMEXTC_0340000007244_TBC1D5	chr2	605.068		ENSGALT00000018357.3	chr2	35162266
AMEXTC_0340000139918_LOC103768321	chr2	607.196		ENSGALT00000018199.4	chr2	34130669
AMEXTC_0340000032727_GLOD5	chr2	609.324		ENSGALT00000044689.1	chr4	11297722
AMEXTC_0340000044922_LOC105402702	chr2	616		ENSGALT00000012072.4	chr4	11117718
AMEXTC_0340000044922_LOC105402702	chr2	616		ENSGALT00000012073.4	chr4	11117413
AMEXTC_0340000187482_NSDHL	chr2	616		ENSGALT00000032336.3	chr4	11231921
AMEXTC_0340000242011_FAAH2	chr2	618.128		ENSGALT00000045205.1	chr4	1790748
AMEXTC_0340000051764_TMLHE	chr2	618.128		ENSGALT00000012043.3	chr4	10979968
AMEXTC_0340000041579_Fam13b	chr2	624.601		ENSGALT00000040234.2	chr13	13695528
AMEXTC_0340000071824_CES4A	chr2	624.601		ENSGALT00000008205.4	chr11	2659
AMEXTC_0340000071824_CES4A	chr2	624.601		ENSGALT00000008207.4	chr11	10631032
AMEXTC_0340000054357_LOC107120690	chr2	624.601		ENSGALT00000046188.1	chrUn	269
AMEXTC_0340000054357_LOC107120690	chr2	624.601		ENSGALT00000046188.1	chrUn	269
AMEXTC_0340000052814_ARHGEF5	chr3	0		ENSGALT00000027929.4	chr1	74562444
AMEXTC_0340000061071_LOC100077982	chr3	0		ENSGALT00000019460.4	chr1	75817330
AMEXTC_0340000057905_KEL	chr3	2.128		ENSGALT00000023764.4	chr1	77334315
AMEXTC_0340000163616_LOC102447214	chr3	2.128		ENSGALT00000023779.4	chr1	77385713
AMEXTC_0340000065162_TRPV6	chr3	2.128		ENSGALT00000023779.4	chr1	77385713
AMEXTC_0340000055983_TRPV6	chr3	2.128		ENSGALT00000023779.4	chr1	77385713
AMEXTC_0340000122741_LSU	chr3	2.128		ENSGALT00000037054.2	chr1	77558923
AMEXTC_0340000182249_PRSS2	chr3	2.128		ENSGALT00000016631.4	chr1	77626336
AMEXTC_0340000123297_PRSS2	chr3	2.128		ENSGALT00000016631.4	chr1	77626336
AMEXTC_0340000156325_LOC101932790	chr3	2.128		ENSGALT00000045891.1	chrUn	2216
AMEXTC_0340000165955_ZNF25	chr3	2.128		ENSGALT00000037547.1	chr1	60058081
AMEXTC_0340000165955_ZNF25	chr3	2.128		ENSGALT00000021139.3	chr1	60057409
AMEXTC_0340000119188_prodh.L	chr3	2.128		ENSGALT00000012531.3	chr15	10110678
AMEXTC_0340000125318_EPHA1	chr3	2.128		ENSGALT00000023671.4	chr1	76976249
AMEXTC_0340000219722_PRDM9	chr3	2.128		ENSGALT00000037547.1	chr1	60058081
AMEXTC_0340000219722_PRDM9	chr3	2.128		ENSGALT00000021139.3	chr1	60057409
AMEXTC_0340000120294_LOC102565486	chr3	2.128		ENSGALT00000037199.2	chr1	75682821
AMEXTC_0340000032575_LOC102507482	chr3	19.539		ENSGALT00000029406.3	chr2	350395
AMEXTC_0340000020125_LOC103801559	chr3	19.539		ENSGALT00000004596.4	chr3	56196430
AMEXTC_0340000250188_LOC110214108	chr3	21.667		ENSGALT00000037547.1	chr1	60058081
AMEXTC_0340000250188_LOC110214108	chr3	21.667		ENSGALT00000046168.1	chrUn	5828
AMEXTC_0340000250188_LOC110214108	chr3	21.667		ENSGALT00000046168.1	chrUn	5828
AMEXTC_0340000250188_LOC110214108	chr3	21.667		ENSGALT00000042642.1	chr2	549448
AMEXTC_0340000250188_LOC110214108	chr3	21.667		ENSGALT00000042642.1	chr2	549448
AMEXTC_0340000250188_LOC110214108	chr3	21.667		ENSGALT00000044672.1	chrUn	23
AMEXTC_0340000250188_LOC110214108	chr3	21.667		ENSGALT00000021139.3	chr1	60057409
AMEXTC_0340000250188_LOC110214108	chr3	21.667		ENSGALT00000000466.4	chrUn	4173
AMEXTC_0340000250188_LOC110214108	chr3	21.667		ENSGALT00000022015.4	chrUn	8518
AMEXTC_0340000250188_LOC110214108	chr3	21.667		ENSGALT00000029406.3	chr2	350395
AMEXTC_0340000250188_LOC110214108	chr3	21.667		ENSGALT00000007821.4	chr2	382546
AMEXTC_0340000034470_LOC102815335	chr3	21.667		ENSGALT00000007821.4	chr2	382546
AMEXTC_0340000060287_LOC105097340	chr3	28.342		ENSGALT00000004596.4	chr3	56196430
AMEXTC_0340000165834_LOC101949135	chr3	28.342		ENSGALT00000009063.3	chr2	451034
AMEXTC_0340000123212_LOC102568417	chr3	30.47		ENSGALT00000001702.4	chr16	402630
AMEXTC_0340000195630_PHC1	chr3	34.705		ENSGALT00000023070.3	chr1	75640947
AMEXTC_0340000183887_CEP250	chr3	39.054		ENSGALT00000002729.6	chr20	1399118
AMEXTC_0340000185412_foxj2-b	chr3	39.054		ENSGALT00000023154.4	chr1	75249234
AMEXTC_0340000185452_phb2	chr3	39.054		ENSGALT00000023492.4	chr1	76828744
AMEXTC_0340000030349_CLSTN3	chr3	39.054		ENSGALT00000023646.4	chr1	76885520
AMEXTC_0340000124809_PTPN6	chr3	39.054		ENSGALT00000023485.4	chr1	76818704
AMEXTC_0340000017154_RIMKLB	chr3	39.054		ENSGALT00000023088.4	chr1	75460566
AMEXTC_0340000034804_P3H3	chr3	39.054		ENSGALT00000023392.4	chr1	76713680
AMEXTC_0340000016316_LOC108697341	chr3	39.054		ENSGALT00000001513.4	chr21	989490
AMEXTC_0340000056891_PRDM9	chr3	39.054		ENSGALT00000037547.1	chr1	60058081
AMEXTC_0340000056891_PRDM9	chr3	39.054		ENSGALT00000040211.2	chr18	15431
AMEXTC_0340000056891_PRDM9	chr3	39.054		ENSGALT00000021794.4	chrLGE22C19W28	122074
AMEXTC_0340000056891_PRDM9	chr3	39.054		ENSGALT00000021139.3	chr1	60057409
AMEXTC_0340000056891_PRDM9	chr3	39.054		ENSGALT00000029406.3	chr2	350395
AMEXTC_0340000056891_PRDM9	chr3	39.054		ENSGALT00000029406.3	chr2	350395
AMEXTC_0340000056891_PRDM9	chr3	39.054		ENSGALT00000029406.3	chr2	350395
AMEXTC_0340000018024_MFAP5	chr3	39.054		ENSGALT00000044632.1	chr1	75420698
AMEXTC_0340000057429_USP5	chr3	39.054		ENSGALT00000023441.4	chr1	76738643
AMEXTC_0340000136694_triose	chr3	39.054		ENSGALT00000023442.2	chr1	76754053
AMEXTC_0340000175596_MLF2	chr3	41.182		ENSGALT00000023361.2	chr1	76644864
AMEXTC_0340000153013_MGC78849	chr3	41.182		ENSGALT00000023348.4	chr1	76569044
AMEXTC_0340000232616_ENO2	chr3	41.182		ENSGALT00000023444.3	chr1	76766962
AMEXTC_0340000062072_RPS3	chr3	44.253		ENSGALT00000036364.2	chr1	194299450
AMEXTC_0340000062072_RPS3	chr3	44.253		ENSGALT00000028006.3	chr1	194298570
AMEXTC_0340000234591_GDPD5	chr3	44.253		ENSGALT00000028007.4	chr1	194098030
AMEXTC_0340000020495_LAMA5	chr3	44.253		ENSGALT00000008535.4	chr20	8180139
AMEXTC_0340000023722_map6	chr3	44.253		ENSGALT00000012041.4	chr1	194007332
AMEXTC_0340000029205_OSBPL2	chr3	44.253		ENSGALT00000008344.4	chr20	8140756
AMEXTC_0340000203619_UVRAG	chr3	44.253		ENSGALT00000036390.2	chr1	193244623
AMEXTC_0340000200750_ZC3H18	chr3	44.253		ENSGALT00000009872.4	chr11	17853539
AMEXTC_0340000157891_SS18L1	chr3	44.253		ENSGALT00000008262.4	chr20	8089800
AMEXTC_0340000043465_LOC108790326	chr3	44.253		ENSGALT00000036597.2	chr2	131690686
AMEXTC_0340000048099_CDH4	chr3	44.253		ENSGALT00000008180.4	chr20	7702267
AMEXTC_0340000154747_SLC17A9	chr3	44.253		ENSGALT00000043825.1	chr20	8789096
AMEXTC_0340000022262_LOC108702649	chr3	44.253		ENSGALT00000008861.3	chr20	8575356
AMEXTC_0340000187198_ncapd2	chr3	44.253		ENSGALT00000023319.4	chr1	76401716
AMEXTC_0340000045598_IFFO1	chr3	44.253		ENSGALT00000023324.4	chr1	76447734
AMEXTC_0340000163238_NOP2	chr3	44.253		ENSGALT00000023326.4	chr1	76463547
AMEXTC_0340000240676_CHD4	chr3	44.253		ENSGALT00000023339.4	chr1	76468777
AMEXTC_0340000035167_st7	chr3	44.253		ENSGALT00000009003.4	chr20	8676629
AMEXTC_0340000035167_st7	chr3	44.253		ENSGALT00000039706.2	chr20	8676629
AMEXTC_0340000139638_MRGBP	chr3	44.253		ENSGALT00000008871.4	chr20	8671064
AMEXTC_0340000010736_gata5.S	chr3	44.253		ENSGALT00000008583.4	chr20	8368250
AMEXTC_0340000246047_TCFL5	chr3	44.253		ENSGALT00000009040.4	chr20	8721854
AMEXTC_0340000250709_SUN3	chr3	44.253		ENSGALT00000043362.1	chr1	50665624
AMEXTC_0340000011746_NKAIN4	chr3	54.426		ENSGALT00000033989.3	chr20	9083386
AMEXTC_0340000142742_birc7	chr3	54.426		ENSGALT00000036426.1	chr1	181828576
AMEXTC_0340000209922_YTHDF1	chr3	54.426		ENSGALT00000009227.4	chr20	9050993
AMEXTC_0340000030471_LOC100075357	chr3	61.102		ENSGALT00000009463.4	chr20	9382941
AMEXTC_0340000223645_PCMTD2	chr3	61.102		ENSGALT00000009494.4	chr20	9427465
AMEXTC_0340000020961_MYT1	chr3	61.102		ENSGALT00000009545.4	chr20	9447728
AMEXTC_0340000046901_col20a1	chr3	61.102		ENSGALT00000009312.4	chr20	9169384
AMEXTC_0340000026064_CHRNA4	chr3	61.102		ENSGALT00000009316.3	chr20	9218844
AMEXTC_0340000011473_KCNQ2	chr3	61.102		ENSGALT00000009353.4	chr20	9280351
AMEXTC_0340000269341_TCEA2	chr3	65.453		ENSGALT00000009608.4	chr20	9699116
AMEXTC_0340000125786_SOX18	chr3	65.453		ENSGALT00000045917.1	chr20	9728461
AMEXTC_0340000024657_UCKL1	chr3	65.453		ENSGALT00000009729.4	chr20	9837209
AMEXTC_0340000011058_SLC2A4RG	chr3	65.453		ENSGALT00000025409.4	chr2	120881813
AMEXTC_0340000214802_ARFRP1	chr3	65.453		ENSGALT00000009849.3	chr20	9977365
AMEXTC_0340000236635_TNFRSF6B	chr3	65.453		ENSGALT00000009858.3	chr20	9998638
AMEXTC_0340000281123_MGC52622	chr3	67.581		ENSGALT00000024899.4	chr2	111749346
AMEXTC_0340000000005_ANGPT4	chr3	67.581		ENSGALT00000045797.1	chr20	10237436
AMEXTC_0340000032828_SCRT2	chr3	67.581		ENSGALT00000044900.1	chr20	10263331
AMEXTC_0340000057551_TCF15	chr3	67.581		ENSGALT00000044738.1	chr20	10271533
AMEXTC_0340000060585_TRIB3	chr3	67.581		ENSGALT00000036892.2	chr3	97427884
AMEXTC_0340000009534_clg18h20orf96	chr3	67.581		ENSGALT00000033804.3	chr20	10320201
AMEXTC_0340000256975_hm13.S	chr3	67.581		ENSGALT00000010020.4	chr20	10334331
AMEXTC_0340000239954_flna	chr3	67.581		ENSGALT00000036256.2	chr12	8851101
AMEXTC_0340000264745_LOC101361888	chr3	67.581		ENSGALT00000009928.4	chr20	14297809
AMEXTC_0340000157910_LOC107108375	chr3	67.581		ENSGALT00000006168.4	chr23	5493120
AMEXTC_0340000028695_GMEB2	chr3	67.581		ENSGALT00000042792.1	chr20	20
AMEXTC_0340000190758_FNDC11	chr3	67.581		ENSGALT00000033832.1	chr20	14280168
AMEXTC_0340000203360_HELZ2	chr3	67.581		ENSGALT00000009906.4	chr20	14260722
AMEXTC_0340000199164_CCM2L	chr3	71.837		ENSGALT00000010473.4	chr20	10446235
AMEXTC_0340000027108_XKR7	chr3	71.837		ENSGALT00000010442.4	chr20	10436887
AMEXTC_0340000056059_LOC103048898	chr3	71.837		ENSGALT00000010432.4	chr20	10420571
AMEXTC_0340000063074_LOC106861640	chr3	71.837		ENSGALT00000010406.3	chr20	10405911
AMEXTC_0340000033811_MYLK2	chr3	71.837		ENSGALT00000010138.3	chr20	10395494
AMEXTC_0340000174199_tpx2.S	chr3	71.837		ENSGALT00000010129.4	chr20	10382092
AMEXTC_0340000174199_tpx2.S	chr3	71.837		ENSGALT00000043409.1	chr20	10382453
AMEXTC_0340000284734_TM9SF4	chr3	71.837		ENSGALT00000010607.3	chr20	10461798
AMEXTC_0340000029024_HCK	chr3	71.837		ENSGALT00000010538.4	chr20	10451054
AMEXTC_0340000151226_COMMD7	chr3	71.837		ENSGALT00000010709.3	chr20	10585430
AMEXTC_0340000232604_mapre1.L	chr3	71.837		ENSGALT00000010768.3	chr20	10610164
AMEXTC_0340000149518_cox4i2	chr3	71.837		ENSGALT00000009231.2	chr11	17077533
AMEXTC_0340000274041_LOC102377907	chr3	71.837		ENSGALT00000010675.4	chr20	10505807
AMEXTC_0340000009821_PHACTR3	chr3	72.773		ENSGALT00000007780.4	chr20	7082080
AMEXTC_0340000269321_LOC108702639	chr3	72.773		ENSGALT00000044639.1	chr2	62969014
AMEXTC_0340000227201_prelid3b.S	chr3	72.773		ENSGALT00000022444.4	chr20	11217490
AMEXTC_0340000202474_LOC101945969	chr3	76.071		ENSGALT00000038990.2	chr20	11575895
AMEXTC_0340000017599_SAMSN1	chr3	81.648		ENSGALT00000025291.2	chr1	97445927
AMEXTC_0340000013969_LOC108794146	chr3	81.648		ENSGALT00000025277.4	chr1	97373312
AMEXTC_0340000002203_phosphoenolpyruvate	chr3	84.701		ENSGALT00000043219.1	chr20	11834689
AMEXTC_0340000002203_phosphoenolpyruvate	chr3	84.701		ENSGALT00000012356.3	chr20	11898239
AMEXTC_0340000055515_PCK1	chr3	84.701		ENSGALT00000043219.1	chr20	11834689
AMEXTC_0340000055515_PCK1	chr3	84.701		ENSGALT00000012356.3	chr20	11898239
AMEXTC_0340000260407_AURKA	chr3	91.39		ENSGALT00000033524.3	chr20	12364934
AMEXTC_0340000032201_CASS4	chr3	91.39		ENSGALT00000012554.4	chr20	12336093
AMEXTC_0340000175612_ZFP64	chr3	109.105		ENSGALT00000012713.4	chr20	13338399
AMEXTC_0340000034102_AP3B2	chr3	110.52		ENSGALT00000006998.3	chrZ	22648563
AMEXTC_0340000294788_RBPMS2	chr3	110.52		ENSGALT00000040332.2	chr10	598369
AMEXTC_0340000101291_DUOX2	chr3	110.52		ENSGALT00000003842.4	chr10	548658
AMEXTC_0340000142942_DUOXA2	chr3	110.52		ENSGALT00000003860.3	chr10	536875
AMEXTC_0340000016043_SNAI1	chr3	110.52		ENSGALT00000024594.4	chr2	108123977
AMEXTC_0340000029511_RIPOR3	chr3	111.213		ENSGALT00000012995.4	chr20	13824099
AMEXTC_0340000036383_SNX21	chr3	111.213		ENSGALT00000011061.4	chr20	10859487
AMEXTC_0340000027854_ADNP	chr3	111.213		ENSGALT00000012969.4	chr20	13752744
AMEXTC_0340000023818_dpm1	chr3	111.213		ENSGALT00000028050.4	chr20	13731016
AMEXTC_0340000221379_SLC35C2	chr3	111.213		ENSGALT00000039096.2	chr20	11071602
AMEXTC_0340000131931_DDX27	chr3	111.213		ENSGALT00000039062.1	chr20	11098518
AMEXTC_0340000159635_ZNFX1	chr3	111.213		ENSGALT00000007763.4	chr20	7062872
AMEXTC_0340000231160_ZSWIM3	chr3	113.351		ENSGALT00000011080.4	chr20	10864586
AMEXTC_0340000269338_CTSA	chr3	115.49		ENSGALT00000011138.4	chr20	10874293
AMEXTC_0340000186865_PLTP	chr3	115.49		ENSGALT00000011167.4	chr20	10878670
AMEXTC_0340000054019_PCIF1	chr3	115.49		ENSGALT00000039136.2	chr20	10887207
AMEXTC_0340000062861_LOC102446471	chr3	115.49		ENSGALT00000007670.4	chr20	6994463
AMEXTC_0340000064886_LOC104267936	chr3	115.49		ENSGALT00000007671.3	chr20	7027764
AMEXTC_0340000060944_KCNB1	chr3	115.49		ENSGALT00000034233.1	chr20	6872690
AMEXTC_0340000038326_ARFGEF2	chr3	117.618		ENSGALT00000007428.4	chr20	6685427
AMEXTC_0340000150588_brefeldin	chr3	117.618		ENSGALT00000007499.4	chr20	6747112
AMEXTC_0340000005608_PREX1	chr3	119.757		ENSGALT00000007358.4	chr20	6529945
AMEXTC_0340000228353_NCOA3	chr3	124.119		ENSGALT00000007275.4	chr20	6203700
AMEXTC_0340000005605_SULF2	chr3	124.119		ENSGALT00000007309.4	chr20	6263028
AMEXTC_0340000171202_SLC13A3	chr3	126.247		ENSGALT00000007073.4	chr20	5895585
AMEXTC_0340000171202_SLC13A3	chr3	126.247		ENSGALT00000007073.4	chr20	5895585
AMEXTC_0340000213479_tp53rk	chr3	126.247		ENSGALT00000007116.4	chr20	5923592
AMEXTC_0340000057559_ada	chr3	130.503		ENSGALT00000006631.4	chr20	5699880
AMEXTC_0340000155251_SERINC3	chr3	130.503		ENSGALT00000023989.4	chr3	60764155
AMEXTC_0340000042820_Ttpal	chr3	130.503		ENSGALT00000006749.3	chr20	5748293
AMEXTC_0340000279838_R3HDML	chr3	130.503		ENSGALT00000006850.4	chr20	5792280
AMEXTC_0340000044428_rims4	chr3	132.631		ENSGALT00000006595.3	chr20	5622924
AMEXTC_0340000180240_ywhab.L	chr3	132.631		ENSGALT00000044506.1	chr20	5585811
AMEXTC_0340000180240_ywhab.L	chr3	132.631		ENSGALT00000006588.2	chr20	5587244
AMEXTC_0340000135263_NCOA5	chr3	134.759		ENSGALT00000011344.4	chr20	10950276
AMEXTC_0340000035141_ZNF335	chr3	139.109		ENSGALT00000039127.2	chr20	10900408
AMEXTC_0340000016556_ABLIM3	chr3	139.109		ENSGALT00000004410.4	chr13	7884128
AMEXTC_0340000145151_matrix	chr3	139.109		ENSGALT00000011323.4	chr20	10917367
AMEXTC_0340000019964_SLC12A5	chr3	139.109		ENSGALT00000011227.4	chr20	10922029
AMEXTC_0340000275185_UBTD2	chr3	139.109		ENSGALT00000004443.3	chr13	8075586
AMEXTC_0340000262767_STK10	chr3	139.109		ENSGALT00000004451.4	chr13	8133601
AMEXTC_0340000170674_SH3PXD2B	chr3	139.109		ENSGALT00000004469.4	chr13	8184041
AMEXTC_0340000240698_GRPEL2	chr3	141.237		ENSGALT00000004213.4	chr13	7857095
AMEXTC_0340000023797_PPARGC1B	chr3	143.365		ENSGALT00000001892.4	chr13	7721192
AMEXTC_0340000203925_ARHGEF37	chr3	143.365		ENSGALT00000001905.4	chr13	7763329
AMEXTC_0340000025100_PCYOX1L	chr3	143.365		ENSGALT00000004198.4	chr13	7850496
AMEXTC_0340000162989_FBXO38	chr3	145.493		ENSGALT00000000759.4	chr13	7523609
AMEXTC_0340000012101_LOC108713229	chr3	147.599		ENSGALT00000015871.4	chrUn	20
AMEXTC_0340000030234_LOC109141183	chr3	147.599		ENSGALT00000029975.3	chr13	9652961
AMEXTC_0340000161133_arl10	chr3	147.599		ENSGALT00000005313.4	chr13	9739218
AMEXTC_0340000157778_KIAA1191	chr3	147.599		ENSGALT00000005328.3	chr13	9742537
AMEXTC_0340000168358_SIMC1	chr3	147.599		ENSGALT00000005337.4	chr13	9752005
AMEXTC_0340000002543_GPRIN1	chr3	147.599		ENSGALT00000045453.1	chr13	9685098
AMEXTC_0340000217837_RNF44	chr3	147.599		ENSGALT00000043300.1	chr13	9707363
AMEXTC_0340000260730_faf2	chr3	147.599		ENSGALT00000005272.4	chr13	9713308
AMEXTC_0340000152563_tspan17	chr3	147.599		ENSGALT00000019968.4	chr4	59392903
AMEXTC_0340000066756_faf2	chr3	147.599		ENSGALT00000005272.4	chr13	9713308
AMEXTC_0340000227008_LOC108710984	chr3	147.599		ENSGALT00000045990.1	chr4	59497315
AMEXTC_0340000227008_LOC108710984	chr3	147.599		ENSGALT00000045402.1	chr13	9669177
AMEXTC_0340000007075_dbn1	chr3	149.727		ENSGALT00000045686.1	chr13	9478587
AMEXTC_0340000007075_dbn1	chr3	149.727		ENSGALT00000042791.1	chr13	9478587
AMEXTC_0340000213569_Protein	chr3	149.727		ENSGALT00000004794.4	chr13	9509429
AMEXTC_0340000227058_LOC104514387	chr3	149.727		ENSGALT00000004699.4	chr13	9540037
AMEXTC_0340000053998_UIMC1	chr3	149.727		ENSGALT00000001743.4	chr13	9614045
AMEXTC_0340000135342_Rab11	chr3	154.077		ENSGALT00000015143.4	chr6	29003776
AMEXTC_0340000164275_TMED9	chr3	154.077		ENSGALT00000044787.1	chrUn	330
AMEXTC_0340000072555_SLC34A1	chr3	154.077		ENSGALT00000004859.4	chr13	9448663
AMEXTC_0340000030679_SLC34A1	chr3	154.077		ENSGALT00000004859.4	chr13	9448663
AMEXTC_0340000025033_F12	chr3	154.077		ENSGALT00000025185.4	chr4	81495985
AMEXTC_0340000053795_LOC108784099	chr3	154.077		ENSGALT00000013605.3	chr5	22803304
AMEXTC_0340000291925_LOC100487104	chr3	154.077		ENSGALT00000025338.4	chr4	83495205
AMEXTC_0340000012733_LOC102946027	chr3	154.077		ENSGALT00000012325.3	chr13	17580931
AMEXTC_0340000055353_LOC109915294	chr3	154.077		ENSGALT00000005039.4	chr13	9397203
AMEXTC_0340000024491_SEPT1	chr3	156.205		ENSGALT00000045829.1	chr19	821427
AMEXTC_0340000003337_ITGAL	chr3	156.205		ENSGALT00000024037.4	chrZ	15721123
AMEXTC_0340000024100_SRCAP	chr3	156.205		ENSGALT00000003682.3	chr15	2568607
AMEXTC_0340000020073_pisd	chr3	156.205		ENSGALT00000011126.4	chr15	8943840
AMEXTC_0340000135701_RNF25	chr3	156.205		ENSGALT00000038222.1	chr7	21959844
AMEXTC_0340000221061_STK36	chr3	156.205		ENSGALT00000018550.3	chr7	21948534
AMEXTC_0340000241259_RNF40	chr3	156.205		ENSGALT00000025065.4	chrZ	64903580
AMEXTC_0340000141634_PHKG2	chr3	156.205		ENSGALT00000003916.3	chr19	4896317
AMEXTC_0340000163928_adora2ab	chr3	158.333		ENSGALT00000028044.3	chr19	6439175
AMEXTC_0340000045746_LOC102565955	chr3	158.333		ENSGALT00000016619.2	chr1	37716013
AMEXTC_0340000005632_LOC110090062	chr3	158.333		ENSGALT00000012997.4	chr10	18646161
AMEXTC_0340000213579_LOC108701723	chr3	158.333		ENSGALT00000033880.2	chr15	8518804
AMEXTC_0340000058337_PELO	chr3	158.333		ENSGALT00000035958.2	chrZ	15637937
AMEXTC_0340000001373_LOC102351091	chr3	160.461		ENSGALT00000024037.4	chrZ	15721123
AMEXTC_0340000188993_LOC101936084	chr3	160.461		ENSGALT00000026715.4	chr3	104625523
AMEXTC_0340000015746_MMP25	chr3	160.461		ENSGALT00000003883.4	chr15	2711272
AMEXTC_0340000006266_ppil3.S	chr3	162.589		ENSGALT00000013390.3	chr7	10805843
AMEXTC_0340000118553_CAVIN2	chr3	162.589		ENSGALT00000043222.1	chr7	7694858
AMEXTC_0340000290762_GSS	chr3	166.845		ENSGALT00000005189.4	chr20	2976984
AMEXTC_0340000277564_LOC108799995	chr3	166.845		ENSGALT00000022935.3	chr14	12938586
AMEXTC_0340000051194_LOC108802072	chr3	166.845		ENSGALT00000043059.1	chr21	6513557
AMEXTC_0340000219026_LOC108802072	chr3	166.845		ENSGALT00000043059.1	chr21	6513557
AMEXTC_0340000118949_LOC108799005	chr3	166.845		ENSGALT00000000620.4	chr28	615633
AMEXTC_0340000030049_LOC108799005	chr3	166.845		ENSGALT00000026003.4	chr1	108297492
AMEXTC_0340000026456_LOC102365082	chr3	166.845		ENSGALT00000022935.3	chr14	12938586
AMEXTC_0340000018892_LOC100352411	chr3	166.845		ENSGALT00000029406.3	chr2	350395
AMEXTC_0340000001812_LOC102365546	chr3	171.196		ENSGALT00000034159.3	chr17	236896
AMEXTC_0340000216647_LOC109641883	chr3	171.196		ENSGALT00000037595.2	chr4	60984022
AMEXTC_0340000216647_LOC109641883	chr3	171.196		ENSGALT00000011874.4	chr24	5494021
AMEXTC_0340000277519_MAPK7	chr3	171.196		ENSGALT00000009143.4	chr19	9256551
AMEXTC_0340000016288_MFAP4	chr3	171.196		ENSGALT00000006154.4	chr17	6043773
AMEXTC_0340000049754_LOC104258025	chr3	171.196		ENSGALT00000004596.4	chr3	56196430
AMEXTC_0340000131777_znf646	chr3	171.196		ENSGALT00000046188.1	chrUn	269
AMEXTC_0340000064479_LOC102692872	chr3	171.196		ENSGALT00000034159.3	chr17	236896
AMEXTC_0340000003202_hypothetical	chr3	171.196		ENSGALT00000000084.4	chr16	144210
AMEXTC_0340000235555_FBXL19	chr3	173.324		ENSGALT00000006725.4	chr15	5469304
AMEXTC_0340000010941_DOC2A	chr3	173.324		ENSGALT00000007864.4	chr19	6999879
AMEXTC_0340000034585_sez6l2.S	chr3	173.324		ENSGALT00000046159.1	chr19	5911367
AMEXTC_0340000228658_Nudt9	chr3	173.324		ENSGALT00000017784.4	chr4	45114313
AMEXTC_0340000140651_mvp.L	chr3	173.324		ENSGALT00000000317.4	chr28	12809
AMEXTC_0340000216423_taok2	chr3	173.324		ENSGALT00000006491.3	chr19	6014950
AMEXTC_0340000269305_fructose-bisphosphate	chr3	173.324		ENSGALT00000045371.1	chr19	5734739
AMEXTC_0340000256782_LOC102357651	chr3	182.44		ENSGALT00000027128.4	chr1	135521669
AMEXTC_0340000015153_LOC106606887	chr3	182.44		ENSGALT00000036134.2	chr19	714994
AMEXTC_0340000122576_CORO1A	chr3	182.44		ENSGALT00000022977.4	chr19	6078719
AMEXTC_0340000122576_CORO1A	chr3	182.44		ENSGALT00000007835.4	chr15	6530371
AMEXTC_0340000224949_RALGAPB	chr3	184.568		ENSGALT00000002165.3	chr20	735964
AMEXTC_0340000036120_CHD6	chr3	184.568		ENSGALT00000002030.4	chr20	650630
AMEXTC_0340000038803_RBL1	chr3	184.568		ENSGALT00000002032.4	chr20	626684
AMEXTC_0340000244529_SOGA1	chr3	184.568		ENSGALT00000005391.4	chr20	3027212
AMEXTC_0340000028929_ACSS2	chr3	184.568		ENSGALT00000005318.4	chr20	2985489
AMEXTC_0340000119404_prodh2	chr3	184.568		ENSGALT00000012531.3	chr15	10110678
AMEXTC_0340000214834_LOC100497060	chr3	186.696		ENSGALT00000023275.4	chr1	76166945
AMEXTC_0340000050697_MGC52578	chr3	186.696		ENSGALT00000017483.2	chr4	42740629
AMEXTC_0340000250203_PIGT	chr3	186.696		ENSGALT00000006220.4	chr20	5439543
AMEXTC_0340000061007_CBFA2T2	chr3	186.696		ENSGALT00000004893.4	chr20	2514608
AMEXTC_0340000137599_E2F1	chr3	186.696		ENSGALT00000043768.1	chr20	2483840
AMEXTC_0340000269308_EIF2S2	chr3	186.696		ENSGALT00000003180.3	chr20	1976104
AMEXTC_0340000013803_SH2B1	chr3	186.696		ENSGALT00000002828.4	chr19	4115481
AMEXTC_0340000056612_LOC102363628	chr3	188.824		ENSGALT00000006413.4	chr20	5499774
AMEXTC_0340000062286_srsf3	chr3	188.824		ENSGALT00000000735.4	chr26	1528342
AMEXTC_0340000062286_srsf3	chr3	188.824		ENSGALT00000044272.1	chr26	1527548
AMEXTC_0340000149152_SDC4	chr3	190.952		ENSGALT00000006265.3	chr20	5472059
AMEXTC_0340000017215_RBM39	chr3	197.43		ENSGALT00000002354.4	chr20	1104769
AMEXTC_0340000139851_NFS1	chr3	197.43		ENSGALT00000042628.1	chr20	1033000
AMEXTC_0340000139851_NFS1	chr3	197.43		ENSGALT00000002384.4	chr20	1137516
AMEXTC_0340000034551_RBM12	chr3	197.43		ENSGALT00000025676.4	chr2	125623602
AMEXTC_0340000053082_LOC108803096	chr3	197.43		ENSGALT00000040501.2	chr20	1565846
AMEXTC_0340000240547_hypothetical	chr3	197.43		ENSGALT00000002799.4	chr20	1591145
AMEXTC_0340000029737_MMP24	chr3	197.43		ENSGALT00000002919.4	chr20	1601527
AMEXTC_0340000235130_LOC108785080	chr3	197.43		ENSGALT00000026348.2	chr2	138077063
AMEXTC_0340000005426_LOC100489773	chr3	197.43		ENSGALT00000026300.4	chr2	140145616
AMEXTC_0340000027019_Fer-1-like	chr3	197.43		ENSGALT00000002596.3	chr20	1306943
AMEXTC_0340000200865_TRPC4AP	chr3	201.686		ENSGALT00000004975.4	chr20	2909212
AMEXTC_0340000054499_GGT7	chr3	201.686		ENSGALT00000001589.4	chr20	469734
AMEXTC_0340000064717_ahcy	chr3	201.686		ENSGALT00000003157.3	chr20	1643849
AMEXTC_0340000056793_myh7b	chr3	201.686		ENSGALT00000012499.4	chr20	2941702
AMEXTC_0340000088973_Itch	chr3	201.686		ENSGALT00000036640.2	chr2	122849872
AMEXTC_0340000053602_ZHX3	chr3	201.686		ENSGALT00000045187.1	chr20	5280565
AMEXTC_0340000044560_PLCG1	chr3	201.686		ENSGALT00000005954.5	chr20	5257491
AMEXTC_0340000005818_MAFB	chr3	203.814		ENSGALT00000044390.1	chr2	148240819
AMEXTC_0340000061259_myosin	chr3	205.942		ENSGALT00000043998.1	chr20	453445
AMEXTC_0340000227258_LPIN3	chr3	205.942		ENSGALT00000023948.4	chr2	100654003
AMEXTC_0340000215368_FAM83D	chr3	205.942		ENSGALT00000004894.4	chr20	4159057
AMEXTC_0340000055039_DHX35	chr3	205.942		ENSGALT00000005796.3	chr20	4170738
AMEXTC_0340000002848_TGIF2	chr3	205.942		ENSGALT00000023884.4	chr2	100479329
AMEXTC_0340000059018_IFT52	chr3	210.293		ENSGALT00000005576.3	chr20	3973500
AMEXTC_0340000216239_DLGAP4	chr3	210.293		ENSGALT00000001567.3	chr20	378825
AMEXTC_0340000186929_Band	chr3	210.293		ENSGALT00000040660.2	chr20	230176
AMEXTC_0340000018204_EPB41L1	chr3	210.293		ENSGALT00000023829.4	chr20	157991
AMEXTC_0340000169343_SRC	chr3	214.549		ENSGALT00000006127.2	chr20	5420257
AMEXTC_0340000003097_BPI	chr3	216.677		ENSGALT00000010917.4	chr20	10686636
AMEXTC_0340000041239_STC2	chr3	218.805		ENSGALT00000040996.2	chr13	8561503
AMEXTC_0340000002043_Janus	chr3	218.805		ENSGALT00000012278.4	chr13	17507415
AMEXTC_0340000008536_DRD1	chr3	218.805		ENSGALT00000040990.2	chr13	9356652
AMEXTC_0340000067092_Msx2	chr3	218.805		ENSGALT00000043501.1	chr13	9128573
AMEXTC_0340000200734_CREBRF	chr3	218.805		ENSGALT00000004538.4	chr13	8491322
AMEXTC_0340000266283_BNIP1	chr3	218.805		ENSGALT00000004545.4	chr13	8510960
AMEXTC_0340000225425_CDK5RAP1	chr3	218.805		ENSGALT00000010897.4	chr20	10679041
AMEXTC_0340000011413_hypothetical	chr3	218.805		ENSGALT00000033711.3	chr20	10663663
AMEXTC_0340000269344_lars	chr3	225.481		ENSGALT00000012114.4	chr13	17255690
AMEXTC_0340000225273_RBM27	chr3	225.481		ENSGALT00000012154.4	chr13	17279459
AMEXTC_0340000035220_PPP2R2B	chr3	225.481		ENSGALT00000012233.4	chr13	17356691
AMEXTC_0340000041151_dpysl3	chr3	225.481		ENSGALT00000012260.4	chr13	17454811
AMEXTC_0340000175801_YIPF5	chr3	227.609		ENSGALT00000011976.3	chr13	17011665
AMEXTC_0340000277506_GDF9	chr3	229.737		ENSGALT00000039889.2	chr13	16391711
AMEXTC_0340000277506_GDF9	chr3	229.737		ENSGALT00000011483.4	chr13	16449980
AMEXTC_0340000217021_SHROOM1	chr3	229.737		ENSGALT00000011470.4	chr13	16362006
AMEXTC_0340000217021_SHROOM1	chr3	229.737		ENSGALT00000043699.1	chr13	5181
AMEXTC_0340000005249_SEPT8	chr3	229.737		ENSGALT00000011178.4	chr13	16307014
AMEXTC_0340000017831_CCNI2	chr3	229.737		ENSGALT00000039902.2	chr13	16302772
AMEXTC_0340000160319_P4HA2	chr3	229.737		ENSGALT00000010797.4	chr13	16062866
AMEXTC_0340000054260_gnpda1	chr3	229.737		ENSGALT00000011833.3	chr13	16632914
AMEXTC_0340000026893_RNF14	chr3	229.737		ENSGALT00000039862.2	chr13	16624522
AMEXTC_0340000026893_RNF14	chr3	229.737		ENSGALT00000011809.4	chr13	16549131
AMEXTC_0340000165954_slc22a4	chr3	234.077		ENSGALT00000010935.4	chr13	16147052
AMEXTC_0340000007438_ACSL6	chr3	234.077		ENSGALT00000010736.4	chr13	15988108
AMEXTC_0340000203938_RAPGEF6	chr3	234.077		ENSGALT00000040030.2	chr13	15796906
AMEXTC_0340000015950_FSTL4	chr3	236.215		ENSGALT00000010526.4	chr13	15562923
AMEXTC_0340000015950_FSTL4	chr3	236.215		ENSGALT00000040043.2	chr13	15562923
AMEXTC_0340000045294_FSTL4	chr3	236.215		ENSGALT00000010526.4	chr13	15562923
AMEXTC_0340000045294_FSTL4	chr3	236.215		ENSGALT00000040043.2	chr13	15562923
AMEXTC_0340000180242_LOC103182116	chr3	244.853		ENSGALT00000010461.3	chr13	15229167
AMEXTC_0340000135001_VDAC1	chr3	244.853		ENSGALT00000010508.3	chr13	15352638
AMEXTC_0340000010232_SEC24A	chr3	244.999		ENSGALT00000010356.3	chr13	15039100
AMEXTC_0340000182946_DDX46	chr3	244.999		ENSGALT00000010339.4	chr13	15011685
AMEXTC_0340000062610_C13H5orf24	chr3	244.999		ENSGALT00000010296.4	chr13	15000020
AMEXTC_0340000036878_SLC25A48	chr3	247.127		ENSGALT00000010250.4	chr13	14577076
AMEXTC_0340000043391_COL23A1	chr3	253.581		ENSGALT00000011272.4	chr17	4660791
AMEXTC_0340000012034_PHYKPL	chr3	253.581		ENSGALT00000023235.4	chr13	13614746
AMEXTC_0340000028470_hnrnpab	chr3	253.581		ENSGALT00000023233.2	chr13	13624725
AMEXTC_0340000028805_LOC102353340	chr3	253.581		ENSGALT00000002863.4	chr6	262583
AMEXTC_0340000130620_nme5.L	chr3	253.581		ENSGALT00000022961.4	chr13	13640150
AMEXTC_0340000027855_SPOCK1	chr3	253.581		ENSGALT00000010115.3	chr13	13906201
AMEXTC_0340000082151_LOC107284146	chr3	255.709		ENSGALT00000001647.4	chr13	990191
AMEXTC_0340000082151_LOC107284146	chr3	255.709		ENSGALT00000045090.1	chr13	990191
AMEXTC_0340000021943_LOC109310132	chr3	255.709		ENSGALT00000018134.4	chr4	45480032
AMEXTC_0340000041346_Gfpt2	chr3	255.709		ENSGALT00000022352.4	chr13	13243832
AMEXTC_0340000039971_LOC102162486	chr3	255.709		ENSGALT00000019344.4	chr1	48977565
AMEXTC_0340000046236_UBN2	chr3	255.709		ENSGALT00000019339.3	chr1	48916532
AMEXTC_0340000196577_TTC26	chr3	255.709		ENSGALT00000019330.4	chr1	48858862
AMEXTC_0340000017118_PURA	chr3	255.709		ENSGALT00000045521.1	chr13	860146
AMEXTC_0340000003320_grin2b	chr3	255.709		ENSGALT00000019272.3	chr1	48326389
AMEXTC_0340000289365_FAM234B	chr3	255.709		ENSGALT00000019258.4	chr1	48121704
AMEXTC_0340000023734_LOC109293765	chr3	255.709		ENSGALT00000045190.1	chr27	4232204
AMEXTC_0340000157743_LOC101340311	chr3	255.709		ENSGALT00000003907.2	chr13	1825980
AMEXTC_0340000024924_ATF7IP	chr3	255.709		ENSGALT00000044359.1	chr1	48701041
AMEXTC_0340000024924_ATF7IP	chr3	255.709		ENSGALT00000019288.2	chr1	48696273
AMEXTC_0340000034621_RUFY1	chr3	255.709		ENSGALT00000009631.4	chr13	12913406
AMEXTC_0340000214627_LOC102462176	chr3	257.837		ENSGALT00000019412.4	chr1	49264034
AMEXTC_0340000067996_LOC102462176	chr3	259.965		ENSGALT00000019412.4	chr1	49264034
AMEXTC_0340000008875_ZC3H7B	chr3	262.093		ENSGALT00000019514.4	chr1	49547223
AMEXTC_0340000211165_TEF	chr3	262.093		ENSGALT00000037963.2	chr1	49520861
AMEXTC_0340000125656_tob2	chr3	262.093		ENSGALT00000019502.3	chr1	49497082
AMEXTC_0340000174786_aco2.L	chr3	262.093		ENSGALT00000019494.3	chr1	49465616
AMEXTC_0340000048819_PMM1	chr3	262.093		ENSGALT00000019482.4	chr1	49444290
AMEXTC_0340000190420_Fam83f	chr3	262.093		ENSGALT00000019690.4	chr1	50119337
AMEXTC_0340000214934_SGSM3	chr3	262.093		ENSGALT00000019637.4	chr1	49920223
AMEXTC_0340000245905_srebf2	chr3	262.093		ENSGALT00000019442.4	chr1	49351393
AMEXTC_0340000215919_LOC102573705	chr3	262.093		ENSGALT00000019527.4	chr1	49611934
AMEXTC_0340000023744_SGSM3	chr3	262.093		ENSGALT00000019637.4	chr1	49920223
AMEXTC_0340000041882_LOC108783671	chr3	264.221		ENSGALT00000019796.4	chr1	50264534
AMEXTC_0340000020138_LOC108715019	chr3	264.221		ENSGALT00000019796.4	chr1	50264534
AMEXTC_0340000029325_LOC108715019	chr3	264.221		ENSGALT00000019796.4	chr1	50264534
AMEXTC_0340000234977_SUN2	chr3	266.349		ENSGALT00000043362.1	chr1	50665624
AMEXTC_0340000041597_cbx6.L	chr3	266.349		ENSGALT00000019893.4	chr1	50627426
AMEXTC_0340000172715_LOC102351810	chr3	266.349		ENSGALT00000013605.3	chr5	22803304
AMEXTC_0340000036597_kcnj4	chr3	266.349		ENSGALT00000020012.4	chr1	50770321
AMEXTC_0340000205430_NCF4	chr3	267.317		ENSGALT00000037791.2	chr1	51419977
AMEXTC_0340000180192_c4h22orf23	chr3	267.317		ENSGALT00000020086.3	chr1	50927712
AMEXTC_0340000035158_polr2f	chr3	267.317		ENSGALT00000020084.2	chr1	50924001
AMEXTC_0340000217313_PLA2G6	chr3	267.317		ENSGALT00000020069.4	chr1	50836438
AMEXTC_0340000234090_triobp	chr3	268.454		ENSGALT00000044117.1	chrUn	20
AMEXTC_0340000245857_NOL12	chr3	268.454		ENSGALT00000020279.3	chr1	50994991
AMEXTC_0340000023063_SH3BP1	chr3	268.454		ENSGALT00000020305.4	chr1	51030350
AMEXTC_0340000114746_lgals2	chr3	268.454		ENSGALT00000005090.3	chr1	51050592
AMEXTC_0340000196526_CDC42EP1	chr3	268.454		ENSGALT00000044673.1	chr1	51065195
AMEXTC_0340000156392_CARD10	chr3	268.454		ENSGALT00000007013.3	chr14	3426897
AMEXTC_0340000035626_ELFN2	chr3	268.454		ENSGALT00000020346.4	chr1	51176829
AMEXTC_0340000231025_TST	chr3	268.454		ENSGALT00000020401.4	chr1	51355165
AMEXTC_0340000048226_LOC108803380	chr3	269.284		ENSGALT00000007821.4	chr2	382546
AMEXTC_0340000031277_LOC103174499	chr3	269.284		ENSGALT00000019575.4	chr16	209965
AMEXTC_0340000081590_ARNTL	chr3	269.284		ENSGALT00000008634.2	chr5	7000992
AMEXTC_0340000064746_EIF3D	chr3	270.561		ENSGALT00000020466.4	chr1	51555103
AMEXTC_0340000016930_HDAC7	chr3	270.561		ENSGALT00000044451.1	chrLGE22C19W28	378549
AMEXTC_0340000051717_LOC102944173	chr3	270.561		ENSGALT00000040211.2	chr18	15431
AMEXTC_0340000187335_LOC104559529	chr3	270.561		ENSGALT00000017295.4	chr8	23298894
AMEXTC_0340000062732_ZNF79	chr3	270.561		ENSGALT00000021794.4	chrLGE22C19W28	122074
AMEXTC_0340000186219_LOC110091469	chr3	270.561		ENSGALT00000000466.4	chrUn	4173
AMEXTC_0340000062653_VDR	chr3	270.561		ENSGALT00000045912.1	chrUn	96207
AMEXTC_0340000243285_gcat.S	chr3	270.561		ENSGALT00000020120.4	chr1	50986026
AMEXTC_0340000008466_GALR3	chr3	270.561		ENSGALT00000020114.4	chr1	50979162
AMEXTC_0340000155264_HMGXB4	chr3	270.561		ENSGALT00000020504.4	chr1	51984101
AMEXTC_0340000185056_HMGXB4	chr3	270.561		ENSGALT00000020504.4	chr1	51984101
AMEXTC_0340000206744_MICALL1	chr3	270.561		ENSGALT00000020035.4	chr1	50931991
AMEXTC_0340000044026_tmem106c.L	chr3	270.561		ENSGALT00000022112.4	chrUn	87530
AMEXTC_0340000016719_alpha1	chr3	270.561		ENSGALT00000035835.2	chrUn	72263
AMEXTC_0340000216839_LOC108718344	chr3	270.561		ENSGALT00000021139.3	chr1	60057409
AMEXTC_0340000216839_LOC108718344	chr3	270.561		ENSGALT00000029406.3	chr2	350395
AMEXTC_0340000032771_pde1b	chr3	272.687		ENSGALT00000044962.1	chrUn	20
AMEXTC_0340000043555_NEUROD4	chr3	272.687		ENSGALT00000041276.1	chrLGE22C19W28	460146
AMEXTC_0340000161144_rapgef3	chr3	272.687		ENSGALT00000010260.4	chrLGE22C19W28	430844
AMEXTC_0340000010176_NCKAP1L	chr3	272.687		ENSGALT00000043483.1	chrUn	87
AMEXTC_0340000181326_LOC102366640	chr3	277.038		ENSGALT00000018458.4	chr2	38757265
AMEXTC_0340000229910_AAAS	chr3	277.038		ENSGALT00000022123.4	chrUn	130917
AMEXTC_0340000190975_sp1	chr3	277.038		ENSGALT00000043769.1	chrUn	1
AMEXTC_0340000271087_LOC108708645	chr3	277.038		ENSGALT00000017607.4	chr7	16830039
AMEXTC_0340000216873_HoxC12	chr3	277.038		ENSGALT00000045895.1	chrUn	4540
AMEXTC_0340000189156_ATF7	chr3	277.038		ENSGALT00000004807.4	chrUn	3689
AMEXTC_0340000053781_homeobox	chr3	277.038		ENSGALT00000038689.2	chr7	15792589
AMEXTC_0340000148404_ESPL1	chr3	279.166		ENSGALT00000016183.4	chrUn	13497
AMEXTC_0340000186722_LOC101946585	chr3	279.166		ENSGALT00000031164.3	chr2	37787390
AMEXTC_0340000015875_itgb7	chr3	279.166		ENSGALT00000012144.3	chr7	7175042
AMEXTC_0340000269302_tetraspanin-31	chr3	279.166		ENSGALT00000043903.1	chr2	28675963
AMEXTC_0340000050816_AVIL	chr3	281.271		ENSGALT00000018647.4	chr7	22032624
AMEXTC_0340000050816_AVIL	chr3	281.271		ENSGALT00000038192.2	chr7	22032621
AMEXTC_0340000050816_AVIL	chr3	281.271		ENSGALT00000009258.4	chr2	4562086
AMEXTC_0340000236742_EEF1AKMT3	chr3	281.271		ENSGALT00000033408.3	chr7	11679315
AMEXTC_0340000021137_SLC11A2	chr3	281.271		ENSGALT00000018648.4	chr7	22049014
AMEXTC_0340000059782_tfcp2.L	chr3	281.271		ENSGALT00000003498.4	chrUn	957
AMEXTC_0340000141532_GALNT6	chr3	283.399		ENSGALT00000010782.4	chrLGE22C19W28	883278
AMEXTC_0340000112994_cela1	chr3	283.399		ENSGALT00000007770.4	chrLGE22C19W28	904339
AMEXTC_0340000192790_BIN2	chr3	283.399		ENSGALT00000018820.4	chr7	23184009
AMEXTC_0340000192790_BIN2	chr3	283.399		ENSGALT00000018822.4	chr7	23184121
AMEXTC_0340000042244_SCN8A	chr3	283.399		ENSGALT00000017935.4	chrLGE22C19W28	48917
AMEXTC_0340000033700_LOC108708579	chr3	285.527		ENSGALT00000046231.1	chrUn	3250
AMEXTC_0340000036036_LOC108784099	chr3	285.527		ENSGALT00000013605.3	chr5	22803304
AMEXTC_0340000196598_LOC100052445	chr3	285.527		ENSGALT00000042948.1	chrLGE22C19W28	937824
AMEXTC_0340000147122_CERS5	chr3	285.527		ENSGALT00000009980.4	chrLGE22C19W28	268330
AMEXTC_0340000150598_PFKM	chr3	285.527		ENSGALT00000044180.1	chrUn	35181
AMEXTC_0340000211178_LOC101443906	chr3	285.527		ENSGALT00000009805.3	chrLGE22C19W28	129651
AMEXTC_0340000072979_LOC100557412	chr3	285.527		ENSGALT00000009805.3	chrLGE22C19W28	129651
AMEXTC_0340000115975_LOC100557412	chr3	285.527		ENSGALT00000009805.3	chrLGE22C19W28	129651
AMEXTC_0340000010234_LOC496284	chr3	285.527		ENSGALT00000009805.3	chrLGE22C19W28	129651
AMEXTC_0340000284159_tmprss12.L	chr3	285.527		ENSGALT00000009813.4	chrLGE22C19W28	132265
AMEXTC_0340000236484_ATF1	chr3	285.527		ENSGALT00000029631.3	chrLGE22C19W28	136856
AMEXTC_0340000002534_DIP2B	chr3	285.527		ENSGALT00000009909.4	chrLGE22C19W28	154786
AMEXTC_0340000218103_LRP1	chr3	287.655		ENSGALT00000045986.1	chrUn	12
AMEXTC_0340000057133_MYO1A	chr3	287.655		ENSGALT00000012496.4	chr7	7514673
AMEXTC_0340000063642_Atp5b	chr3	287.655		ENSGALT00000036114.2	chrLGE22C19W28	954485
AMEXTC_0340000123044_LOC100052445	chr3	287.655		ENSGALT00000042948.1	chrLGE22C19W28	937824
AMEXTC_0340000159609_LOC101815107	chr3	287.655		ENSGALT00000042948.1	chrLGE22C19W28	937824
AMEXTC_0340000044782_KIF5A	chr3	289.783		ENSGALT00000020366.4	chr7	34274370
AMEXTC_0340000279824_MBD6	chr3	289.783		ENSGALT00000020351.4	chr7	34160694
AMEXTC_0340000031149_ARHGAP9	chr3	289.783		ENSGALT00000037826.2	chr7	32211978
AMEXTC_0340000221865_R3hdm2	chr3	289.783		ENSGALT00000019996.4	chr7	30060586
AMEXTC_0340000015829_LOC102355609	chr3	289.783		ENSGALT00000043884.1	chr7	25068117
AMEXTC_0340000019982_inhbc.1	chr3	289.783		ENSGALT00000043884.1	chr7	25068117
AMEXTC_0340000019928_TNS2	chr3	294.039		ENSGALT00000020347.4	chr2	55148544
AMEXTC_0340000184769_gcat	chr3	294.039		ENSGALT00000020120.4	chr1	50986026
AMEXTC_0340000057652_LOC108709866	chr3	294.039		ENSGALT00000013382.4	chr1	12815214
AMEXTC_0340000063657_sp5l	chr3	294.039		ENSGALT00000045599.1	chr7	17752449
AMEXTC_0340000007828_arhgef25.L	chr3	294.039		ENSGALT00000021178.4	chr2	76311200
AMEXTC_0340000071471_LOC108796077	chr3	296.145		ENSGALT00000045526.1	chrLGE22C19W28	657673
AMEXTC_0340000061966_LOC108797350	chr3	296.145		ENSGALT00000003702.4	chrLGE22C19W28	688656
AMEXTC_0340000015355_LOC104614514	chr3	296.145		ENSGALT00000003703.4	chrLGE22C19W28	679788
AMEXTC_0340000015355_LOC104614514	chr3	296.145		ENSGALT00000016650.3	chrLGE22C19W28	667140
[truncated: 5,535 more rows]
