# Supplementary material for: A chromosome-scale assembly of the axolotl genome
Source: HighWire-hosted journal article supplement (doi:10.1101/gr.241901.118), 2019-01-24
Supplement: Supplemental_Table_6.xlsx [file Supplemental_Table_6.xlsx]

## Sheet: Sheet1
Supplementary Table 6 - an axolotl / human comparative map.
A. mexicanum				human hg38
gene	chromosome	Position (cM)		gene	refseq ID	chromosome	start position
AMEXTC_0340000056697_LOC102259710	chr1	0		ZNF3	NP_116313.3	chr7	100069970
AMEXTC_0340000056697_LOC102259710	chr1	0		ZNF383	NP_689817.1	chr19	37226463
AMEXTC_0340000056697_LOC102259710	chr1	0		ZNF470	NP_001001668.3	chr19	56567520
AMEXTC_0340000056697_LOC102259710	chr1	0		ZNF583	NP_689691.2	chr19	56404324
AMEXTC_0340000056697_LOC102259710	chr1	0		ZNF658	NP_149350.3	chr9	66900724
AMEXTC_0340000056697_LOC102259710	chr1	0		ZNF658	NP_149350.3	chr9	66900724
AMEXTC_0340000056697_LOC102259710	chr1	0		ZNF658	NP_149350.3	chr9	66900724
AMEXTC_0340000056697_LOC102259710	chr1	0		ZNF79	NP_009066.2	chr9	127424373
AMEXTC_0340000056697_LOC102259710	chr1	0		ZNF850	NP_001180481.1	chr19	36743477
AMEXTC_0340000056697_LOC102259710	chr1	0		ZNF850	NP_001180481.1	chr19	36743477
AMEXTC_0340000060302_ZNF282	chr1	0		ZNF551	NP_612356.2	chr19	57681968
AMEXTC_0340000060302_ZNF282	chr1	0		ZNF551	NP_612356.2	chr19	57681968
AMEXTC_0340000060302_ZNF282	chr1	0		ZNF662	NP_997287.2	chr3	42905909
AMEXTC_0340000178868_LOC107737464	chr1	0		ZNF358	NP_060553.4	chr19	7516117
AMEXTC_0340000178868_LOC107737464	chr1	0		ZNF771	NP_057727.2	chr16	30407413
AMEXTC_0340000013990_nucleotide-binding	chr1	2.128		SPEN	NP_055816.2	chr1	15847863
AMEXTC_0340000016453_LOC107118174	chr1	2.128		DNAJC3	NP_006251.1	chr13	95677138
AMEXTC_0340000053817_nucleotide-binding	chr1	2.128		SPEN	NP_055816.2	chr1	15847863
AMEXTC_0340000058019_nucleotide-binding	chr1	2.128		SPEN	NP_055816.2	chr1	15847863
AMEXTC_0340000064191_LOC110322417	chr1	2.128		ZNF12	NP_008887.2	chr7	6688433
AMEXTC_0340000064191_LOC110322417	chr1	2.128		ZNF214	NP_037381.2	chr11	6997084
AMEXTC_0340000064191_LOC110322417	chr1	2.128		ZNF214	NP_037381.2	chr11	6997084
AMEXTC_0340000064191_LOC110322417	chr1	2.128		ZNF233	NP_861421.2	chr19	44259913
AMEXTC_0340000064191_LOC110322417	chr1	2.128		ZNF3	NP_116313.3	chr7	100069970
AMEXTC_0340000064191_LOC110322417	chr1	2.128		ZNF300	NP_443092.1	chr5	150894391
AMEXTC_0340000064191_LOC110322417	chr1	2.128		ZNF329	NP_078896.3	chr19	58126327
AMEXTC_0340000064191_LOC110322417	chr1	2.128		ZNF383	NP_689817.1	chr19	37226463
AMEXTC_0340000064191_LOC110322417	chr1	2.128		ZNF383	NP_689817.1	chr19	37226463
AMEXTC_0340000064191_LOC110322417	chr1	2.128		ZNF41	NP_009061.1	chrX	47445177
AMEXTC_0340000064191_LOC110322417	chr1	2.128		ZNF470	NP_001001668.3	chr19	56567520
AMEXTC_0340000064191_LOC110322417	chr1	2.128		ZNF782	NP_001001662.1	chr9	96816270
AMEXTC_0340000064191_LOC110322417	chr1	2.128		ZNF79	NP_009066.2	chr9	127424373
AMEXTC_0340000147962_BIRC7	chr1	2.128		BIRC7	NP_071444.1	chr20	63235882
AMEXTC_0340000161279_Zfp982	chr1	2.128		ZNF300	NP_443092.1	chr5	150894391
AMEXTC_0340000161279_Zfp982	chr1	2.128		ZNF510	NP_055745.1	chr9	96754548
AMEXTC_0340000179149_LOC101944500	chr1	2.128		ZNF16	NP_008889.2	chr8	144930357
AMEXTC_0340000179149_LOC101944500	chr1	2.128		ZNF436	NP_085137.1	chr1	23359447
AMEXTC_0340000190639_LOC100619372	chr1	2.128		ZNF300	NP_443092.1	chr5	150894391
AMEXTC_0340000190639_LOC100619372	chr1	2.128		ZNF484	NP_113674.1	chr9	92844195
AMEXTC_0340000190645_LOC102376062	chr1	2.128		ZNF300	NP_443092.1	chr5	150894391
AMEXTC_0340000190645_LOC102376062	chr1	2.128		ZNF484	NP_113674.1	chr9	92844195
AMEXTC_0340000196330_LOC105750141	chr1	2.128		ZFP2	NP_085116.2	chr5	178895893
AMEXTC_0340000196330_LOC105750141	chr1	2.128		ZNF160	NP_150630.2	chr19	53066613
AMEXTC_0340000196330_LOC105750141	chr1	2.128		ZNF184	NP_009080.2	chr6	27450741
AMEXTC_0340000196330_LOC105750141	chr1	2.128		ZNF28	NP_008900.3	chr19	52797407
AMEXTC_0340000196330_LOC105750141	chr1	2.128		ZNF347	NP_115973.2	chr19	53138703
AMEXTC_0340000196330_LOC105750141	chr1	2.128		ZNF347	NP_115973.2	chr19	53138703
AMEXTC_0340000196330_LOC105750141	chr1	2.128		ZNF41	NP_009061.1	chrX	47445177
AMEXTC_0340000196330_LOC105750141	chr1	2.128		ZNF484	NP_113674.1	chr9	92844195
AMEXTC_0340000196330_LOC105750141	chr1	2.128		ZNF585B	NP_689492.3	chr19	37181578
AMEXTC_0340000196330_LOC105750141	chr1	2.128		ZNF616	NP_848618.2	chr19	52113090
AMEXTC_0340000196330_LOC105750141	chr1	2.128		ZNF624	NP_065838.2	chr17	16620733
AMEXTC_0340000196330_LOC105750141	chr1	2.128		ZNF624	NP_065838.2	chr17	16620733
AMEXTC_0340000196330_LOC105750141	chr1	2.128		ZNF658	NP_149350.3	chr9	66900724
AMEXTC_0340000196330_LOC105750141	chr1	2.128		ZNF708	NP_067092.2	chr19	21291160
AMEXTC_0340000196330_LOC105750141	chr1	2.128		ZNF79	NP_009066.2	chr9	127424373
AMEXTC_0340000196330_LOC105750141	chr1	2.128		ZNF81	NP_009068.2	chrX	47836901
AMEXTC_0340000196330_LOC105750141	chr1	2.128		ZNF879	NP_001129588.1	chr5	179023751
AMEXTC_0340000212996_FIS1	chr1	2.128		FIS1	NP_057152.2	chr7	101239611
AMEXTC_0340000277558_nucleotide-binding	chr1	2.128		SPEN	NP_055816.2	chr1	15847863
AMEXTC_0340000290800_pcolce.L	chr1	2.128		PCOLCE	NP_002584.2	chr7	100602258
AMEXTC_0340000003970_EPHB4	chr1	4.255		EPHB4	NP_004435.3	chr7	100802564
AMEXTC_0340000005610_hypothetical	chr1	4.255		GP1BA	NP_000164.5	chr17	4932274
AMEXTC_0340000005610_hypothetical	chr1	4.255		LRRC15	NP_570843.2	chr3	194355246
AMEXTC_0340000006529_LOC108799996	chr1	4.255		SBK1	NP_001019572.1	chr16	28292518
AMEXTC_0340000018095_LOC109918324	chr1	4.255		HSD17B12	NP_057226.1	chr11	43680592
AMEXTC_0340000024401_CD68	chr1	4.255		LAMP1	NP_005552.3	chr13	113297153
AMEXTC_0340000062409_CHRNE	chr1	4.255		CHRNE	NP_000071.1	chr17	4897768
AMEXTC_0340000136241_pld2	chr1	4.255		PLD2	NP_002654.3	chr17	4807100
AMEXTC_0340000187406_SENP3	chr1	4.255		SENP3	NP_056485.2	chr17	7561991
AMEXTC_0340000200405_eif4e2rs1	chr1	4.255		EIF4E2	NP_004837.1	chr2	232550586
AMEXTC_0340000211426_LOC101396116	chr1	4.255		MINK1	NP_056531.1	chr17	4833339
AMEXTC_0340000230061_SLC25A11	chr1	4.255		SLC25A11	NP_003553.2	chr17	4937130
AMEXTC_0340000256979_dnaJ-like	chr1	4.255		DNAJC18	NP_689899.1	chr5	139410202
AMEXTC_0340000275208_LOC109916070	chr1	4.255		MB21D2	NP_848591.2	chr3	192796815
AMEXTC_0340000284685_SRRT	chr1	4.255		SRRT	NP_056992.4	chr7	100875078
AMEXTC_0340000301492_psmb6.L	chr1	4.255		PSMB6	NP_002789.1	chr17	4796143
AMEXTC_0340000016669_sat2	chr1	8.606		SAT1	NP_002961.1	chrX	23783157
AMEXTC_0340000016669_sat2	chr1	8.606		SAT2	NP_597998.1	chr17	7626233
AMEXTC_0340000056824_LOC102694791	chr1	8.606		PLSCR2	NP_065092.1	chr3	146433287
AMEXTC_0340000056824_LOC102694791	chr1	8.606		PLSCR3	NP_065093.2	chr17	7389727
AMEXTC_0340000131485_CHRNB1	chr1	8.606		CHRNB1	NP_000738.2	chr17	7445086
AMEXTC_0340000180359_LOC109993265	chr1	8.606		SAT2	NP_597998.1	chr17	7626233
AMEXTC_0340000181135_LOC108711825	chr1	8.606		PLSCR3	NP_065093.2	chr17	7389727
AMEXTC_0340000005584_BCL6B	chr1	10.734		BCL6	NP_001697.2	chr3	187721376
AMEXTC_0340000028312_LOC102364374	chr1	10.734		ATP13A3	NP_078800.3	chr3	194402673
AMEXTC_0340000031514_TFR2	chr1	10.734		TFR2	NP_003218.2	chr7	100620415
AMEXTC_0340000038754_LOC102355217	chr1	10.734		ZBTB38	NP_001073881.2	chr3	141324212
AMEXTC_0340000050024_LOC108801593	chr1	10.734		ST8SIA6	NP_001004470.1	chr10	17315413
AMEXTC_0340000066162_LOC106553141	chr1	10.734		GNB2	NP_005264.2	chr7	100673739
AMEXTC_0340000146267_polr2a	chr1	10.734		POLR2A	NP_000928.1	chr17	7484378
AMEXTC_0340000152265_TNK1	chr1	10.734		TNK2	NP_005772.3	chr3	195863364
AMEXTC_0340000194474_slc16a13	chr1	10.734		SLC16A13	NP_963860.1	chr17	7036074
AMEXTC_0340000199364_hypothetical	chr1	10.734		ATP1B2	NP_001669.3	chr17	7650889
AMEXTC_0340000210831_LOC102365065	chr1	10.734		LPP	NP_005569.1	chr3	188212932
AMEXTC_0340000237340_tumor	chr1	10.734		TP53	NP_000537.3	chr17	7668401
AMEXTC_0340000277490_LOC107118085	chr1	10.734		PIK3CA	NP_006209.2	chr3	179148522
AMEXTC_0340000289383_acap1	chr1	10.734		ACAP1	NP_055531.1	chr17	7336528
AMEXTC_0340000022798_SLC2A4	chr1	13.507		SLC2A1	NP_006507.2	chr1	42925374
AMEXTC_0340000032393_DLG4	chr1	13.507		DLG4	NP_001356.1	chr17	7189890
AMEXTC_0340000180178_CTDNEP1	chr1	13.507		CTDNEP1	NP_056158.2	chr17	7243586
AMEXTC_0340000185794_GIGYF1	chr1	13.507		GIGYF1	NP_072096.2	chr7	100679505
AMEXTC_0340000192380_ELP5	chr1	13.507		ELP5	NP_056177.3	chr17	7252200
AMEXTC_0340000202253_cldn7.L	chr1	13.507		CLDN7	NP_001298.3	chr17	7259902
AMEXTC_0340000227188_acadvl	chr1	13.507		ACADVL	NP_000009.1	chr17	7219830
AMEXTC_0340000267488_POP7	chr1	13.507		POP7	NP_005828.2	chr7	100706052
AMEXTC_0340000291920_LOC109922709	chr1	13.507		DVL2	NP_004413.1	chr17	7225341
AMEXTC_0340000148081_ZNHIT1	chr1	19.487		ZNHIT1	NP_006340.1	chr7	101217703
AMEXTC_0340000228437_ARHGEF15	chr1	19.487		ARHGEF15	NP_079290.1	chr17	8310821
AMEXTC_0340000145054_RANGRF	chr1	21.615		RANGRF	NP_057576.2	chr17	8288650
AMEXTC_0340000180969_KDM6B	chr1	21.615		KDM6B	NP_001073893.1	chr17	7839916
AMEXTC_0340000275598_wrap53	chr1	21.615		WRAP53	NP_060551.2	chr17	7688348
AMEXTC_0340000037441_EFNB3	chr1	23.743		EFNB2	NP_004084.1	chr13	106489730
AMEXTC_0340000116392_CHD5	chr1	23.743		CHD3	NP_005843.2	chr17	7888850
AMEXTC_0340000164641_NAA38	chr1	23.743		NAA38	NP_115732.2	chr17	7856680
AMEXTC_0340000190627_dnah2.L	chr1	23.743		DNAH2	NP_001290199.1	chr17	7717759
AMEXTC_0340000223092_LOC110087748	chr1	23.743		CYB5D1	NP_653208.2	chr17	7857726
AMEXTC_0340000024291_LOXe	chr1	25.87		ALOXE3	NP_067641.2	chr17	8095899
AMEXTC_0340000046206_COPS6	chr1	25.87		COPS6	NP_006824.2	chr7	100088959
AMEXTC_0340000112991_LOC108788008	chr1	25.87		NXPE3	NP_659474.1	chr3	101779176
AMEXTC_0340000132117_LOC108788008	chr1	25.87		NXPE3	NP_659474.1	chr3	101779176
AMEXTC_0340000195994_LOC108711750	chr1	25.87		GAL3ST2	NP_071417.2	chr2	241776824
AMEXTC_0340000174355_SNAPC2	chr1	29.131		SNAPC2	NP_003074.1	chr19	7920308
AMEXTC_0340000192652_LOC102358281	chr1	29.131		FMO4	NP_002013.1	chr1	171314182
AMEXTC_0340000031321_acetylcholinesterase	chr1	32.347		BCHE	NP_000046.1	chr3	165772902
AMEXTC_0340000044360_period	chr1	32.347		PER1	NP_002607.2	chr17	8140469
AMEXTC_0340000017531_NAT16	chr1	36.697		NAT16	NP_940973.2	chr7	101170492
AMEXTC_0340000063049_TRIM56	chr1	36.697		TRIM56	NP_112223.1	chr7	101085438
AMEXTC_0340000220775_AP1S1	chr1	36.697		AP1S1	NP_001274.1	chr7	101154397
AMEXTC_0340000004904_APC2	chr1	41.048		APC2	NP_001338202.1	chr19	1452983
AMEXTC_0340000009530_plk2	chr1	41.048		PLK2	NP_006613.2	chr5	58453982
AMEXTC_0340000046369_ARRB2	chr1	41.048		ARRB2	NP_004304.1	chr17	4710493
AMEXTC_0340000046518_MOGAT3	chr1	41.048		DGAT2	NP_115953.2	chr11	75768732
AMEXTC_0340000058621_THOP1	chr1	41.048		THOP1	NP_003240.1	chr19	2785459
AMEXTC_0340000139577_SGTA	chr1	41.048		SGTA	NP_003012.1	chr19	2754713
AMEXTC_0340000193929_clg2h17orf49	chr1	41.048		C17orf49	NP_001136270.1	chr17	7014736
AMEXTC_0340000229420_ndufs7	chr1	41.048		NDUFS7	NP_077718.3	chr19	1383883
AMEXTC_0340000233155_alox12	chr1	41.048		ALOX5	NP_000689.1	chr10	45374165
AMEXTC_0340000235091_GAMT	chr1	41.048		GAMT	NP_000147.1	chr19	1397025
AMEXTC_0340000260392_REEP6	chr1	41.048		REEP5	NP_005660.4	chr5	112876383
AMEXTC_0340000265034_GADD45B	chr1	41.048		GADD45B	NP_056490.2	chr19	2476124
AMEXTC_0340000042142_CBARP	chr1	43.176		CBARP	NP_689982.3	chr19	1229947
AMEXTC_0340000046035_CIRBP	chr1	43.176		CIRBP	NP_001271.1	chr19	1269267
AMEXTC_0340000061995_RNA-binding	chr1	43.176		CIRBP	NP_001271.1	chr19	1269267
AMEXTC_0340000149133_MIDN	chr1	43.176		MIDN	NP_796375.3	chr19	1248552
AMEXTC_0340000191332_ABCA7	chr1	43.176		ABCA1	NP_005493.2	chr9	104781002
AMEXTC_0340000269400_STK11	chr1	43.176		STK11	NP_000446.1	chr19	1205798
AMEXTC_0340000283997_atp5d	chr1	43.176		ATP5D	NP_001678.1	chr19	1241749
AMEXTC_0340000034770_ARHGAP45	chr1	43.176		ARHGAP45	NP_036424.2	chr19	1067165
AMEXTC_0340000152283_WDR18	chr1	47.526		WDR18	NP_077005.2	chr19	984327
AMEXTC_0340000172113_arid3a.S	chr1	47.526		ARID3A	NP_005215.1	chr19	926036
AMEXTC_0340000247124_TMEM259	chr1	47.526		TMEM259	NP_001028198.1	chr19	1009650
AMEXTC_0340000234473_R3HDM4	chr1	48.526		R3HDM4	NP_620129.2	chr19	896502
AMEXTC_0340000006407_MED16	chr1	49.632		MED16	NP_005472.2	chr19	867961
AMEXTC_0340000057224_AZU1	chr1	49.632		PRTN3	NP_002768.3	chr19	840984
AMEXTC_0340000064182_LOC108790337	chr1	49.632		PRSS57	NP_999875.1	chr19	685520
AMEXTC_0340000143126_LOC106541429	chr1	49.632		GZMB	NP_004122.2	chr14	24630955
AMEXTC_0340000143126_LOC106541429	chr1	49.632		GZMH	NP_219491.1	chr14	24606479
AMEXTC_0340000164740_FSTL3	chr1	49.632		FSTL3	NP_005851.1	chr19	676388
AMEXTC_0340000179773_RNF126	chr1	49.632		RNF126	NP_919442.1	chr19	647525
AMEXTC_0340000241130_LOC102461656	chr1	53.982		ZNF16	NP_008889.2	chr8	144930357
AMEXTC_0340000241130_LOC102461656	chr1	53.982		ZNF229	NP_055333.3	chr19	44426250
AMEXTC_0340000241130_LOC102461656	chr1	53.982		ZNF286A	NP_065703.1	chr17	15699576
AMEXTC_0340000241130_LOC102461656	chr1	53.982		ZNF286A	NP_065703.1	chr17	15699576
AMEXTC_0340000241130_LOC102461656	chr1	53.982		ZNF286B	NP_001138517.1	chr17	18658429
AMEXTC_0340000241130_LOC102461656	chr1	53.982		ZNF3	NP_116313.3	chr7	100069970
AMEXTC_0340000241130_LOC102461656	chr1	53.982		ZNF551	NP_612356.2	chr19	57681968
AMEXTC_0340000241130_LOC102461656	chr1	53.982		ZNF66	NP_001342126.1	chr19	20776248
AMEXTC_0340000241130_LOC102461656	chr1	53.982		ZNF675	NP_612203.2	chr19	23652905
AMEXTC_0340000241130_LOC102461656	chr1	53.982		ZNF676	NP_001001411.2	chr19	22179100
AMEXTC_0340000241130_LOC102461656	chr1	53.982		ZNF79	NP_009066.2	chr9	127424373
AMEXTC_0340000241130_LOC102461656	chr1	53.982		ZNF850	NP_001180481.1	chr19	36743477
AMEXTC_0340000241130_LOC102461656	chr1	53.982		ZNF853	NP_060030.1	chr7	6615616
AMEXTC_0340000241130_LOC102461656	chr1	53.982		ZSCAN30	NP_001106205.1	chr18	35251057
AMEXTC_0340000016162_S1PR4	chr1	56.11		S1PR4	NP_003766.1	chr19	3178737
AMEXTC_0340000018008_LOC109925183	chr1	56.11		TLE1	NP_005068.2	chr9	81583682
AMEXTC_0340000018008_LOC109925183	chr1	56.11		TLE3	NP_005069.2	chr15	70047790
AMEXTC_0340000018008_LOC109925183	chr1	56.11		TLE4	NP_008936.2	chr9	79571772
AMEXTC_0340000044385_LOC107120597	chr1	56.11		CTSG	NP_001902.1	chr14	24573517
AMEXTC_0340000225354_LOC106556348	chr1	56.11		GNA11	NP_002058.2	chr19	3094409
AMEXTC_0340000225354_LOC106556348	chr1	56.11		GNAQ	NP_002063.2	chr9	77716273
AMEXTC_0340000226860_AES	chr1	56.11		AES	NP_001121.2	chr19	3052909
AMEXTC_0340000239665_PLPP2	chr1	56.11		PLPP2	NP_003703.1	chr19	281039
AMEXTC_0340000008918_LOC108442439	chr1	58.238		SPIN1	NP_006708.2	chr9	88388381
AMEXTC_0340000022532_B3GNT3	chr1	58.238		B3GNT3	NP_055071.2	chr19	17795109
AMEXTC_0340000022532_B3GNT3	chr1	58.238		B3GNT6	NP_619651.3	chr11	77034340
AMEXTC_0340000163779_B3GNT3	chr1	58.238		B3GNT3	NP_055071.2	chr19	17795109
AMEXTC_0340000195991_FCHO1	chr1	58.238		FCHO2	NP_620137.2	chr5	72955980
AMEXTC_0340000223620_LOC109320532	chr1	58.238		RGMA	NP_064596.2	chr15	93043405
AMEXTC_0340000018458_CILP2	chr1	60.347		CILP2	NP_694953.2	chr19	19538264
AMEXTC_0340000132644_TM6SF2	chr1	60.347		TM6SF2	NP_001001524.2	chr19	19264364
AMEXTC_0340000171768_ANO8	chr1	60.347		ANO8	NP_066010.1	chr19	17323222
AMEXTC_0340000002761_NWD1	chr1	62.475		NWD1	NP_001007526.3	chr19	16719975
AMEXTC_0340000038954_MYO9B	chr1	62.475		MYO9B	NP_004136.2	chr19	17075780
AMEXTC_0340000063183_hypothetical	chr1	62.475		CHERP	NP_006378.3	chr19	16517888
AMEXTC_0340000080842_TMEM38A	chr1	62.475		TMEM38A	NP_076979.1	chr19	16661126
AMEXTC_0340000161508_RFXANK	chr1	62.475		RFXANK	NP_003712.1	chr19	19192198
AMEXTC_0340000161533_ddx49	chr1	62.475		DDX49	NP_061943.2	chr19	18919674
AMEXTC_0340000176300_SUGP2	chr1	62.475		SUGP2	NP_055699.2	chr19	18990886
AMEXTC_0340000184453_TMEM161A	chr1	62.475		TMEM161B	NP_699185.1	chr5	88195205
AMEXTC_0340000196387_SIN3B	chr1	62.475		SIN3B	NP_001284524.1	chr19	16829386
AMEXTC_0340000221817_ARMC6	chr1	62.475		ARMC6	NP_001186125.1	chr19	19033577
AMEXTC_0340000222861_GDF1	chr1	62.475		GDF3	NP_065685.1	chr12	7689781
AMEXTC_0340000228567_EPS15L1	chr1	62.475		EPS15L1	NP_067058.1	chr19	16361577
AMEXTC_0340000235243_sugp2.L	chr1	62.475		SUGP2	NP_055699.2	chr19	18990886
AMEXTC_0340000024449_reverse	chr1	64.603		MAST3	NP_055831.1	chr19	18097792
AMEXTC_0340000030695_ELL	chr1	64.603		ELL	NP_006523.1	chr19	18442662
AMEXTC_0340000159136_crtc1	chr1	64.603		CRTC1	NP_056136.2	chr19	18683614
AMEXTC_0340000178425_KLHL26	chr1	64.603		KLHL26	NP_060786.1	chr19	18636964
AMEXTC_0340000193046_LOC100485024	chr1	64.603		B4GALT1	NP_001488.2	chr9	33110640
AMEXTC_0340000227578_INSR	chr1	64.603		INSR	NP_000199.2	chr19	7112254
AMEXTC_0340000198767_trex2.S	chr1	64.603		TREX2	NP_542432.2	chrX	153444719
AMEXTC_0340000169068_PTPRS	chr1	66.731		PTPRS	NP_002841.3	chr19	5205507
AMEXTC_0340000026567_LOC102948310	chr1	68.859		CTSV	NP_001324.2	chr9	97029676
AMEXTC_0340000256845_UHRF1	chr1	68.859		UHRF1	NP_037414.3	chr19	4910366
AMEXTC_0340000291946_TNFAIP8L1	chr1	68.859		TNFAIP8	NP_055165.2	chr5	119355819
AMEXTC_0340000026593_LOC102948209	chr1	73.115		MALT1	NP_006776.1	chr18	58671385
AMEXTC_0340000035564_SHD	chr1	73.115		SHB	NP_003019.2	chr9	37915897
AMEXTC_0340000055291_MATK	chr1	73.115		MATK	NP_002369.2	chr19	3777968
AMEXTC_0340000066413_EEF2	chr1	73.115		EEF2	NP_001952.1	chr19	3976055
AMEXTC_0340000082534_Fizzy-related	chr1	73.115		FZR1	NP_057347.2	chr19	3506296
AMEXTC_0340000121380_STAP2	chr1	73.115		STAP2	NP_060190.2	chr19	4324042
AMEXTC_0340000136669_CACTIN	chr1	73.115		CACTIN	NP_067054.1	chr19	3610644
AMEXTC_0340000140180_Ubxn6	chr1	73.115		UBXN6	NP_079517.1	chr19	4445005
AMEXTC_0340000167109_DOHH	chr1	73.115		DOHH	NP_112594.1	chr19	3490820
AMEXTC_0340000168316_FSD1	chr1	73.115		FSD1	NP_077309.1	chr19	4304593
AMEXTC_0340000179131_ZBTB7A	chr1	73.115		ZBTB7A	NP_056982.1	chr19	4043303
AMEXTC_0340000179364_MPND	chr1	73.115		MPND	NP_001287791.1	chr19	4343526
AMEXTC_0340000195705_MFSD12	chr1	73.115		MFSD12	NP_778148.2	chr19	3544198
AMEXTC_0340000224101_TJP3	chr1	73.115		TJP3	NP_001254490.1	chr19	3721698
AMEXTC_0340000227914_NFIC	chr1	73.115		NFIC	NP_005588.2	chr19	3366566
AMEXTC_0340000233522_MBD3	chr1	73.115		MBD3	NP_001268382.1	chr19	1576670
AMEXTC_0340000240330_LOC104481215	chr1	73.115		MYO5A	NP_000250.3	chr15	52307283
AMEXTC_0340000003246_REXO1	chr1	77.465		REXO1	NP_065746.3	chr19	1815245
AMEXTC_0340000013886_LOC102347076	chr1	77.465		ZFAND5	NP_005998.1	chr9	72351424
AMEXTC_0340000054927_CUNH19orf35	chr1	77.465		PRAG1	NP_001074295.2	chr8	8317735
AMEXTC_0340000174501_ABHD17A	chr1	77.465		ABHD17A	NP_112490.3	chr19	1876975
AMEXTC_0340000188955_SCAMP4	chr1	77.465		SCAMP4	NP_524558.1	chr19	1905213
AMEXTC_0340000196209_KLF16	chr1	77.465		KLF13	NP_057079.2	chr15	31326854
AMEXTC_0340000229359_atp8b3.L	chr1	77.465		ATP8B3	NP_620168.1	chr19	1782074
AMEXTC_0340000015740_ZAP70	chr1	81.816		ZAP70	NP_001070.2	chr2	97713567
AMEXTC_0340000020576_LOC108509118	chr1	81.816		MUC16	NP_078966.2	chr19	8848843
AMEXTC_0340000027954_acsbg2	chr1	81.816		ACSBG2	NP_112186.3	chr19	6135632
AMEXTC_0340000051319_LOC102939947	chr1	81.816		MUC16	NP_078966.2	chr19	8848843
AMEXTC_0340000065174_tmprss9	chr1	81.816		TMPRSS9	NP_892018.1	chr19	2389770
AMEXTC_0340000174920_MLLT1	chr1	81.816		MLLT1	NP_005925.2	chr19	6210380
AMEXTC_0340000175643_LONP1	chr1	81.816		LONP1	NP_001263408.1	chr19	5691833
AMEXTC_0340000242651_VMAC	chr1	81.816		VMAC	NP_001017921.1	chr19	5904840
AMEXTC_0340000039935_FBN3	chr1	83.944		FBN2	NP_001990.2	chr5	128257908
AMEXTC_0340000045940_LOC101952458	chr1	83.944		TCAF1	NP_055534.1	chr7	143851367
AMEXTC_0340000045940_LOC101952458	chr1	83.944		TCAF2	NP_001123498.2	chr7	143715845
AMEXTC_0340000051595_LOC101952039	chr1	83.944		GZMB	NP_004122.2	chr14	24630955
AMEXTC_0340000058743_LOC103183500	chr1	86.072		ADAM10	NP_001101.1	chr15	58595203
AMEXTC_0340000059327_LOC108802522	chr1	86.072		SAFB	NP_002958.2	chr19	5623034
AMEXTC_0340000172122_LOC102455588	chr1	86.072		ZNF3	NP_116313.3	chr7	100069970
AMEXTC_0340000173644_ZNF3	chr1	86.072		ZNF675	NP_612203.2	chr19	23652905
AMEXTC_0340000256562_LOC103198887	chr1	86.072		ZFP2	NP_085116.2	chr5	178895893
AMEXTC_0340000256562_LOC103198887	chr1	86.072		ZKSCAN7	NP_061121.2	chr3	44555174
AMEXTC_0340000256562_LOC103198887	chr1	86.072		ZNF180	NP_037388.3	chr19	44474427
AMEXTC_0340000256562_LOC103198887	chr1	86.072		ZNF3	NP_116313.3	chr7	100069970
AMEXTC_0340000256562_LOC103198887	chr1	86.072		ZNF3	NP_116313.3	chr7	100069970
AMEXTC_0340000256562_LOC103198887	chr1	86.072		ZNF300	NP_443092.1	chr5	150894391
AMEXTC_0340000256562_LOC103198887	chr1	86.072		ZNF300	NP_443092.1	chr5	150894391
AMEXTC_0340000256562_LOC103198887	chr1	86.072		ZNF329	NP_078896.3	chr19	58126327
AMEXTC_0340000256562_LOC103198887	chr1	86.072		ZNF544	NP_055295.2	chr19	58228680
AMEXTC_0340000256562_LOC103198887	chr1	86.072		ZNF554	NP_001096121.1	chr19	2819873
AMEXTC_0340000256562_LOC103198887	chr1	86.072		ZNF79	NP_009066.2	chr9	127424373
AMEXTC_0340000256562_LOC103198887	chr1	86.072		ZSCAN2	NP_870992.2	chr15	84601017
AMEXTC_0340000256562_LOC103198887	chr1	86.072		ZSCAN20	NP_660281.2	chr1	33472630
AMEXTC_0340000023981_ADAMTSL4	chr1	88.2		ADAMTSL4	NP_061905.2	chr1	150549368
AMEXTC_0340000030666_lpl	chr1	88.2		LPL	NP_000228.1	chr8	19939070
AMEXTC_0340000034445_RPRD2	chr1	88.2		RPRD2	NP_056018.2	chr1	150364110
AMEXTC_0340000045117_KANK3	chr1	88.2		KANK1	NP_055973.2	chr9	504554
AMEXTC_0340000060215_anxa9.L	chr1	88.2		ANXA2	NP_004030.1	chr15	60347150
AMEXTC_0340000067017_HNRNPM	chr1	88.2		HNRNPM	NP_005959.2	chr19	8444918
AMEXTC_0340000195582_CERS2	chr1	88.2		CERS2	NP_071358.1	chr1	150965172
AMEXTC_0340000274036_TIMM44	chr1	88.2		TIMM44	NP_006342.2	chr19	7926717
AMEXTC_0340000000162_IFIH1	chr1	90.328		IFIH1	NP_071451.2	chr2	162267078
AMEXTC_0340000214412_GABPB2	chr1	90.328		GABPB2	NP_001310841.1	chr1	151070577
AMEXTC_0340000221856_sema6c	chr1	90.328		SEMA6C	NP_112175.2	chr1	151131686
AMEXTC_0340000003807_CLK2	chr1	92.456		CLK2	NP_003984.2	chr1	155262867
AMEXTC_0340000024606_TRIM46	chr1	92.456		TRIM46	NP_079334.3	chr1	155173786
AMEXTC_0340000026214_thbs3.L	chr1	92.456		THBS3	NP_009043.1	chr1	155195587
AMEXTC_0340000031330_ASH1L	chr1	92.456		ASH1L	NP_060959.2	chr1	155335260
AMEXTC_0340000054822_DAP3	chr1	92.456		DAP3	NP_004623.1	chr1	155689093
AMEXTC_0340000120585_LOC102934296	chr1	92.456		PRSS3	NP_002762.2	chr9	33795560
AMEXTC_0340000188737_SYT11	chr1	92.456		SYT11	NP_689493.3	chr1	155859468
AMEXTC_0340000213456_SCAMP3	chr1	92.456		SCAMP3	NP_005689.2	chr1	155255978
AMEXTC_0340000220995_SLC50A1	chr1	92.456		SLC50A1	NP_061333.2	chr1	155135811
AMEXTC_0340000227601_GON4L	chr1	92.456		GON4L	NP_115668.4	chr1	155764461
AMEXTC_0340000251532_LOC108699476	chr1	94.584		EFNA3	NP_004943.1	chr1	155078871
AMEXTC_0340000005751_selenium	chr1	98.925		SELENBP1	NP_003935.2	chr1	151364301
AMEXTC_0340000153075_Pmvk	chr1	98.925		PMVK	NP_006547.1	chr1	154924731
AMEXTC_0340000157925_selenium	chr1	98.925		SELENBP1	NP_003935.2	chr1	151364301
AMEXTC_0340000173657_PI4KB	chr1	98.925		PI4KB	NP_002642.1	chr1	151291796
AMEXTC_0340000213474_myo1e.2	chr1	98.925		MYO1E	NP_004989.2	chr15	59135968
AMEXTC_0340000264977_psmd4.L	chr1	98.925		PSMD4	NP_002801.1	chr1	151254720
AMEXTC_0340000009588_double-stranded	chr1	101.053		ADAR	NP_001102.2	chr1	154582057
AMEXTC_0340000010441_CHRNB2	chr1	101.053		CHRNB2	NP_000739.1	chr1	154567780
AMEXTC_0340000012304_CELF3	chr1	101.053		CELF3	NP_009116.3	chr1	151700057
AMEXTC_0340000021010_NPR1	chr1	101.053		NPR1	NP_000897.3	chr1	153678687
AMEXTC_0340000045349_ILF2	chr1	101.053		ILF2	NP_004506.2	chr1	153661787
AMEXTC_0340000132661_TPM3	chr1	101.053		TPM3	NP_705935.1	chr1	154155303
AMEXTC_0340000157591_ATP8B2	chr1	101.053		ATP8B2	NP_065185.1	chr1	154327799
AMEXTC_0340000159420_LOC102350161	chr1	101.053		SLC27A2	NP_003636.2	chr15	50182195
AMEXTC_0340000213143_UBAP2L	chr1	101.053		UBAP2L	NP_055662.3	chr1	154220848
AMEXTC_0340000213144_LOC107543893	chr1	101.053		C1orf43	NP_001284652.1	chr1	154211460
AMEXTC_0340000121204_CA14	chr1	105.404		CA14	NP_036245.1	chr1	150257742
AMEXTC_0340000003348_ARHGEF2	chr1	107.532		ARHGEF2	NP_004714.2	chr1	155946838
AMEXTC_0340000009370_GnRH	chr1	107.532		GNRHR	NP_000397.1	chr4	67737380
AMEXTC_0340000019744_POLR3GL	chr1	107.532		POLR3GL	NP_115681.1	chr1	145964681
AMEXTC_0340000023172_CENPN	chr1	107.532		CENPN	NP_060925.2	chr16	81006497
AMEXTC_0340000032593_SV2A	chr1	107.532		SV2A	NP_055664.3	chr1	149903319
AMEXTC_0340000055829_ITGA10	chr1	107.532		ITGA10	NP_003628.2	chr1	145891207
AMEXTC_0340000059749_RNF115	chr1	107.532		RNF115	NP_055270.1	chr1	145746081
AMEXTC_0340000169427_OTUD7B	chr1	107.532		OTUD7B	NP_064590.2	chr1	149940329
AMEXTC_0340000179317_CDYL2	chr1	107.532		CDYL2	NP_689555.2	chr16	80597898
AMEXTC_0340000202142_SF3B4	chr1	107.532		SF3B4	NP_005841.1	chr1	149923316
AMEXTC_0340000203086_SSR2	chr1	107.532		SSR2	NP_003136.1	chr1	156009047
AMEXTC_0340000031155_VAT1L	chr1	113.916		VAT1L	NP_065978.1	chr16	77788563
AMEXTC_0340000049369_NUDT7	chr1	113.916		NUDT7	NP_001099133.1	chr16	77722491
AMEXTC_0340000014918_CDH8	chr1	116.044		CDH8	NP_001787.2	chr16	61652010
AMEXTC_0340000001951_ADGRG5	chr1	118.172		ADGRG5	NP_722579.1	chr16	57542636
AMEXTC_0340000014280_ADGRG1	chr1	118.172		ADGRG1	NP_005673.3	chr16	57619997
AMEXTC_0340000015632_CA7	chr1	118.172		PDP2	NP_065837.1	chr16	66880360
AMEXTC_0340000018946_LOC104575536	chr1	118.172		SLC7A6	NP_003974.3	chr16	68264515
AMEXTC_0340000024612_CPNE2	chr1	118.172		CPNE2	NP_689940.3	chr16	57092542
AMEXTC_0340000033482_EXOC3L1	chr1	118.172		EXOC3L1	NP_848611.2	chr16	67184378
AMEXTC_0340000046162_SMPD3	chr1	118.172		SMPD3	NP_061137.1	chr16	68358326
AMEXTC_0340000054462_ELMO3	chr1	118.172		ELMO1	NP_055615.8	chr7	36852905
AMEXTC_0340000054462_ELMO3	chr1	118.172		ELMO2	NP_573403.1	chr20	46366044
AMEXTC_0340000064147_Ras	chr1	118.172		RRAD	NP_004156.1	chr16	66921678
AMEXTC_0340000202542_PLA2G15	chr1	118.172		PLA2G15	NP_036452.1	chr16	68245343
AMEXTC_0340000214307_KIAA0895L	chr1	118.172		KIAA0895L	NP_001035805.1	chr16	67175601
AMEXTC_0340000003662_lcat	chr1	120.3		LCAT	NP_000220.1	chr16	67939883
AMEXTC_0340000006509_calb2.S	chr1	120.3		CALB2	NP_001731.2	chr16	71358712
AMEXTC_0340000012434_MTSS1L	chr1	120.3		MTSS1L	NP_612392.1	chr16	70661203
AMEXTC_0340000020776_KIFC3	chr1	120.3		KIFC3	NP_005541.3	chr16	57758216
AMEXTC_0340000026836_ldhd.L	chr1	120.3		LDHD	NP_919417.1	chr16	75111859
AMEXTC_0340000039064_RIPOR1	chr1	120.3		RIPOR1	NP_078795.2	chr16	67528813
AMEXTC_0340000040793_FUK	chr1	120.3		FUK	NP_659496.2	chr16	70454594
AMEXTC_0340000043737_LOC109310426	chr1	120.3		FBLN7	NP_694946.2	chr2	112138384
AMEXTC_0340000046640_TEPP	chr1	120.3		TEPP	NP_955535.2	chr16	57976434
AMEXTC_0340000057175_RASGRP3	chr1	120.3		RASGRP3	NP_056191.1	chr2	33513874
AMEXTC_0340000073995_LOC102932553	chr1	120.3		ZKSCAN1	NP_003430.1	chr7	100015551
AMEXTC_0340000073995_LOC102932553	chr1	120.3		ZNF300	NP_443092.1	chr5	150894391
AMEXTC_0340000073995_LOC102932553	chr1	120.3		ZSCAN2	NP_870992.2	chr15	84601017
AMEXTC_0340000073995_LOC102932553	chr1	120.3		ZSCAN20	NP_660281.2	chr1	33472630
AMEXTC_0340000122336_ctrl	chr1	120.3		CTRL	NP_001898.1	chr16	67929569
AMEXTC_0340000128130_LOC108715072	chr1	120.3		CTRB1	NP_001897.4	chr16	75218985
AMEXTC_0340000128130_LOC108715072	chr1	120.3		CTRB2	NP_001020371.3	chr16	75204095
AMEXTC_0340000134796_PDPR	chr1	120.3		PDPR	NP_060460.4	chr16	70113625
AMEXTC_0340000145837_AARS	chr1	120.3		AARS	NP_001596.2	chr16	70252393
AMEXTC_0340000145871_WDR59	chr1	120.3		WDR59	NP_085058.3	chr16	74873572
AMEXTC_0340000154261_CMTR2	chr1	120.3		CMTR2	NP_060818.4	chr16	71282299
AMEXTC_0340000158609_BCAR1	chr1	120.3		BCAR1	NP_055382.2	chr16	75228186
AMEXTC_0340000167970_SLC38A7	chr1	120.3		SLC38A7	NP_060701.1	chr16	58665108
AMEXTC_0340000176193_VAC14	chr1	120.3		VAC14	NP_060522.3	chr16	70687438
AMEXTC_0340000179841_fhod1.L	chr1	120.3		FHOD1	NP_037373.2	chr16	67229388
AMEXTC_0340000180261_EDC4	chr1	120.3		EDC4	NP_055144.3	chr16	67873022
AMEXTC_0340000180947_KATNB1	chr1	120.3		KATNB1	NP_005877.2	chr16	57735747
AMEXTC_0340000185695_GFOD2	chr1	120.3		GFOD2	NP_110446.3	chr16	67674532
AMEXTC_0340000190751_atp6v0d1.L	chr1	120.3		ATP6V0D1	NP_004682.2	chr16	67438013
AMEXTC_0340000195262_SETD6	chr1	120.3		SETD6	NP_079136.2	chr16	58515478
AMEXTC_0340000206329_LOC102560429	chr1	120.3		SNRK	NP_060189.3	chr3	43286511
AMEXTC_0340000207987_sf3b3	chr1	120.3		SF3B3	NP_036558.3	chr16	70523787
AMEXTC_0340000225581_ctcf.S	chr1	120.3		CTCF	NP_001177951.1	chr16	67562406
AMEXTC_0340000231457_PLEKHG4	chr1	120.3		PLEKHG4	NP_001123199.1	chr16	67278156
AMEXTC_0340000231663_hydin	chr1	120.3		HYDIN	NP_001257903.1	chr16	70802083
AMEXTC_0340000231990_LOC102379799	chr1	120.3		CLEC18A	NP_872425.2	chr16	69950901
AMEXTC_0340000231990_LOC102379799	chr1	120.3		CLEC18B	NP_001011880.2	chr16	74408630
AMEXTC_0340000231990_LOC102379799	chr1	120.3		CLEC18C	NP_775890.2	chr16	70174172
AMEXTC_0340000241667_HSD11B2	chr1	120.3		HSD11B2	NP_000187.3	chr16	67431132
AMEXTC_0340000243066_hydin	chr1	120.3		HYDIN	NP_001257903.1	chr16	70802083
AMEXTC_0340000005700_nek2	chr1	129.104		DAPK3	NP_001339.1	chr19	3958452
AMEXTC_0340000014151_LOC108796764	chr1	129.104		MEGF10	NP_115822.1	chr5	127290763
AMEXTC_0340000014151_LOC108796764	chr1	129.104		PEAR1	NP_001073940.1	chr1	156893730
AMEXTC_0340000056743_ISG20L2	chr1	129.104		ISG20L2	NP_001290024.1	chr1	156721890
AMEXTC_0340000216161_insulin	chr1	129.104		INSRR	NP_055030.1	chr1	156840872
AMEXTC_0340000064900_TOMM40L	chr1	133.455		TOMM40L	NP_115550.2	chr1	161225938
AMEXTC_0340000157570_ETHE1	chr1	133.455		ETHE1	NP_055112.2	chr19	43506718
AMEXTC_0340000161884_LOC102946650	chr1	133.455		DUSP23	NP_060293.2	chr1	159780945
AMEXTC_0340000192925_ILVBL	chr1	133.455		ILVBL	NP_006835.2	chr19	15114973
AMEXTC_0340000260738_EIF3F	chr1	133.455		EIF3F	NP_003745.1	chr11	7987319
AMEXTC_0340000270860_UFC1	chr1	133.455		UFC1	NP_057490.2	chr1	161153743
AMEXTC_0340000098131_Zfp182	chr1	135.583		ZNF182	NP_008893.1	chrX	47974850
AMEXTC_0340000098131_Zfp182	chr1	135.583		ZNF182	NP_008893.1	chrX	47974850
AMEXTC_0340000098131_Zfp182	chr1	135.583		ZNF658	NP_149350.3	chr9	66900724
AMEXTC_0340000205828_LOC110391971	chr1	135.583		ZNF135	NP_003427.3	chr19	58059238
AMEXTC_0340000205828_LOC110391971	chr1	135.583		ZNF347	NP_115973.2	chr19	53138703
AMEXTC_0340000205828_LOC110391971	chr1	135.583		ZNF470	NP_001001668.3	chr19	56567520
AMEXTC_0340000225665_LOC104577560	chr1	135.583		BTN3A3	NP_008925.1	chr6	26440471
AMEXTC_0340000002966_NECAB2	chr1	137.711		NECAB2	NP_061938.2	chr16	83968631
AMEXTC_0340000044054_OSGIN1	chr1	137.711		OSGIN1	NP_892026.1	chr16	83953221
AMEXTC_0340000044737_LOC108696826	chr1	137.711		ETFB	NP_001976.1	chr19	51345154
AMEXTC_0340000180537_MBTPS1	chr1	137.711		MBTPS1	NP_003782.1	chr16	84053760
AMEXTC_0340000211068_PLEKHG6	chr1	137.711		PLEKHG6	NP_060643.2	chr12	6310435
AMEXTC_0340000233392_CETP	chr1	137.711		CETP	NP_000069.2	chr16	56961922
AMEXTC_0340000168581_usf2	chr1	142.061		USF2	NP_003358.1	chr19	35268977
AMEXTC_0340000256792_tmem147	chr1	142.061		TMEM147	NP_116024.1	chr19	35545599
AMEXTC_0340000164058_rbm42.S	chr1	144.189		RBM42	NP_077297.2	chr19	35629015
AMEXTC_0340000165727_KMT2B	chr1	144.189		KMT2B	NP_055542.1	chr19	35718018
AMEXTC_0340000017329_kirrel2	chr1	146.317		KIRREL1	NP_060710.3	chr1	157993272
AMEXTC_0340000082746_peptidylaminoacyl-L/D-isomerase	chr1	146.317		FCGBP	NP_003881.2	chr19	39863322
AMEXTC_0340000182240_arhgap33	chr1	146.317		ARHGAP33	NP_443180.2	chr19	35775514
AMEXTC_0340000243728_LOC102946739	chr1	146.317		FCGBP	NP_003881.2	chr19	39863322
AMEXTC_0340000243728_LOC102946739	chr1	146.317		FCGBP	NP_003881.2	chr19	39863322
AMEXTC_0340000277518_LOC110538136	chr1	146.317		ST14	NP_068813.1	chr11	130159786
AMEXTC_0340000301476_lin37	chr1	146.317		LIN37	NP_061977.1	chr19	35748360
AMEXTC_0340000003048_LOC108696889	chr1	148.445		FCGBP	NP_003881.2	chr19	39863322
AMEXTC_0340000007155_LOC101947369	chr1	148.445		FCGBP	NP_003881.2	chr19	39863322
AMEXTC_0340000155844_LOC101942353	chr1	148.445		FCGBP	NP_003881.2	chr19	39863322
AMEXTC_0340000204191_LOC108697889	chr1	148.445		FCGBP	NP_003881.2	chr19	39863322
AMEXTC_0340000204191_LOC108697889	chr1	148.445		FCGBP	NP_003881.2	chr19	39863322
AMEXTC_0340000204191_LOC108697889	chr1	148.445		FCGBP	NP_003881.2	chr19	39863322
AMEXTC_0340000243727_FCGBP	chr1	148.445		FCGBP	NP_003881.2	chr19	39863322
AMEXTC_0340000243727_FCGBP	chr1	148.445		FCGBP	NP_003881.2	chr19	39863322
AMEXTC_0340000040710_LOC102356001	chr1	152.701		CD22	NP_001172030.1	chr19	35329168
AMEXTC_0340000046190_GRAMD1A	chr1	152.701		GRAMD1A	NP_065946.2	chr19	35000319
AMEXTC_0340000008377_FCGBP	chr1	154.829		FCGBP	NP_003881.2	chr19	39863322
AMEXTC_0340000014308_MAG	chr1	154.829		MAG	NP_002352.1	chr19	35292085
AMEXTC_0340000030944_FCGBP	chr1	154.829		FCGBP	NP_003881.2	chr19	39863322
AMEXTC_0340000030944_FCGBP	chr1	154.829		FCGBP	NP_003881.2	chr19	39863322
AMEXTC_0340000180125_b4galt3	chr1	154.829		B4GALT3	NP_003770.1	chr1	161171309
AMEXTC_0340000281079_FBL	chr1	154.829		FBL	NP_001427.2	chr19	39834452
AMEXTC_0340000038975_lrrc4b	chr1	157.957		LRRC4B	NP_001073926.1	chr19	50516892
AMEXTC_0340000043097_lrrc4b	chr1	157.957		LRRC4B	NP_001073926.1	chr19	50516892
AMEXTC_0340000004400_rcn3.L	chr1	177.495		CALU	NP_001210.1	chr7	128739291
AMEXTC_0340000039130_CLEC11A	chr1	177.495		CLEC11A	NP_002966.1	chr19	50723347
AMEXTC_0340000043279_RIC8A	chr1	177.495		RIC8A	NP_001273063.1	chr11	207510
AMEXTC_0340000137779_UTP18	chr1	177.495		UTP18	NP_057085.2	chr17	51260535
AMEXTC_0340000251646_PRRG2	chr1	177.495		PRRG2	NP_000942.1	chr19	49581329
AMEXTC_0340000260782_emc10	chr1	177.495		EMC10	NP_778233.4	chr19	50476476
AMEXTC_0340000275700_nosip.S	chr1	177.495		NOSIP	NP_057037.1	chr19	49555467
AMEXTC_0340000005116_LOC107116597	chr1	183.973		BAX	NP_620116.1	chr19	48954859
AMEXTC_0340000010521_slc17a8.L	chr1	183.973		SLC17A7	NP_064705.1	chr19	49429397
AMEXTC_0340000012370_TBC1D17	chr1	183.973		TBC1D17	NP_078958.2	chr19	49877424
AMEXTC_0340000018540_dusp8	chr1	183.973		DUSP8	NP_004411.2	chr11	1554050
AMEXTC_0340000034112_ppfia3	chr1	183.973		PPFIA3	NP_003651.1	chr19	49119388
AMEXTC_0340000039464_LIN7B	chr1	183.973		LIN7B	NP_071448.1	chr19	49114360
AMEXTC_0340000060528_ferritin	chr1	183.973		FTH1	NP_002023.2	chr11	61964284
AMEXTC_0340000150741_tub	chr1	183.973		TUB	NP_003311.2	chr11	8038632
AMEXTC_0340000155499_ferritin	chr1	183.973		FTH1	NP_002023.2	chr11	61964284
AMEXTC_0340000164382_GYS1	chr1	183.973		GYS1	NP_002094.2	chr19	48968124
AMEXTC_0340000177676_slc6a16.S	chr1	183.973		SLC6A15	NP_001139807.1	chr12	84859487
AMEXTC_0340000188020_dhdh	chr1	183.973		DHDH	NP_055290.1	chr19	48933681
AMEXTC_0340000195189_pnkp.S	chr1	183.973		PNKP	NP_009185.2	chr19	49861202
AMEXTC_0340000199249_LOC108800660	chr1	183.973		NUCB1	NP_006175.2	chr19	48900049
AMEXTC_0340000213480_kif18b	chr1	183.973		KIF18B	NP_001251503.1	chr17	44924710
AMEXTC_0340000279781_pih1d1	chr1	183.973		PIH1D1	NP_060386.1	chr19	49446292
AMEXTC_0340000003612_rasip1.S	chr1	202.041		RASIP1	NP_060275.2	chr19	48720584
AMEXTC_0340000010997_ZNF579	chr1	202.041		ZNF165	NP_003438.1	chr6	28080703
AMEXTC_0340000010997_ZNF579	chr1	202.041		ZNF358	NP_060553.4	chr19	7516117
AMEXTC_0340000010997_ZNF579	chr1	202.041		ZNF45	NP_003416.1	chr19	43912623
AMEXTC_0340000019076_SULT2B1	chr1	202.041		SULT1A1	NP_001046.2	chr16	28605586
AMEXTC_0340000019076_SULT2B1	chr1	202.041		SULT2B1	NP_004596.2	chr19	48575735
AMEXTC_0340000033394_LOC110390411	chr1	202.041		SSC5D	NP_001138422.1	chr19	55488502
AMEXTC_0340000037137_LOC108789546	chr1	202.041		MYH10	NP_005955.3	chr17	8474204
AMEXTC_0340000042317_LOC108696650	chr1	202.041		SBK1	NP_001019572.1	chr16	28292518
AMEXTC_0340000047408_CD5L	chr1	202.041		SSC5D	NP_001138422.1	chr19	55488502
AMEXTC_0340000053841_U2AF2	chr1	202.041		U2AF2	NP_001012496.1	chr19	55654049
AMEXTC_0340000056877_LOC104527945	chr1	202.041		CD163L1	NP_777601.2	chr12	7354960
AMEXTC_0340000173618_myosin-10-like	chr1	202.041		MYH10	NP_005955.3	chr17	8474204
AMEXTC_0340000174983_ZNF865	chr1	202.041		ZNF865	NP_001182534.1	chr19	55613592
AMEXTC_0340000188273_ube2s.S	chr1	202.041		UBE2S	NP_055316.2	chr19	55401281
AMEXTC_0340000218239_sbk1	chr1	202.041		SBK1	NP_001019572.1	chr16	28292518
AMEXTC_0340000267550_znf628.S	chr1	202.041		GRWD1	NP_113673.3	chr19	48445772
AMEXTC_0340000280142_LOC100493724	chr1	202.041		SPAG9	NP_003962.3	chr17	50962173
AMEXTC_0340000043306_dbp	chr1	204.169		DBP	NP_001343.2	chr19	48630559
AMEXTC_0340000047869_ZNF423	chr1	204.169		ZNF423	NP_055884.2	chr16	49487530
AMEXTC_0340000059067_ITFG1	chr1	206.297		ITFG1	NP_110417.2	chr16	47154387
AMEXTC_0340000103085_PHKB	chr1	206.297		PHKB	NP_000284.1	chr16	47461298
AMEXTC_0340000132475_SIAH1	chr1	206.297		SIAH1	NP_001006611.1	chr16	48360535
AMEXTC_0340000256850_LONP2	chr1	206.297		LONP2	NP_113678.2	chr16	48244166
AMEXTC_0340000027884_MYLK3	chr1	222.206		MYLK3	NP_872299.2	chr16	46702281
AMEXTC_0340000080971_LOC101937707	chr1	222.206		UQCRFS1	NP_005994.2	chr19	29207259
AMEXTC_0340000180260_LOC101937707	chr1	222.206		UQCRFS1	NP_005994.2	chr19	29207259
AMEXTC_0340000207250_neto2.S	chr1	222.206		NETO2	NP_060562.3	chr16	47081519
AMEXTC_0340000009792_LOC104625553	chr1	235.361		ZNF536	NP_055532.1	chr19	30372392
AMEXTC_0340000036326_ZNF536	chr1	235.361		ZNF536	NP_055532.1	chr19	30372392
AMEXTC_0340000292171_URI1	chr1	235.361		URI1	NP_003787.2	chr19	29942238
AMEXTC_0340000010478_PAQR6	chr1	237.489		PAQR6	NP_940798.1	chr1	156243320
AMEXTC_0340000010586_BCAN	chr1	237.489		BCAN	NP_940819.1	chr1	156641947
AMEXTC_0340000039619_LOC107214511	chr1	237.489		RAB11A	NP_004654.1	chr15	65869458
AMEXTC_0340000046196_LOC108802041	chr1	237.489		RHBG	NP_065140.3	chr1	156369188
AMEXTC_0340000063799_GAN	chr1	237.489		GAN	NP_071324.1	chr16	81314965
AMEXTC_0340000066385_GPI	chr1	237.489		GPI	NP_000166.2	chr19	34365119
AMEXTC_0340000137902_UBQLN4	chr1	237.489		UBQLN4	NP_064516.2	chr1	156035293
AMEXTC_0340000195282_LOC102456231	chr1	237.489		CES2	NP_003860.2	chr16	66934443
AMEXTC_0340000208729_UBA2	chr1	237.489		UBA2	NP_005490.1	chr19	34428362
AMEXTC_0340000215977_TTC24	chr1	237.489		TTC24	NP_001099139.2	chr1	156581364
AMEXTC_0340000240225_gpatch4.L	chr1	237.489		GPATCH4	NP_872620.1	chr1	156594307
AMEXTC_0340000260710_SMG5	chr1	237.489		SMG5	NP_056142.2	chr1	156249223
AMEXTC_0340000260780_TMEM79	chr1	237.489		TMEM79	NP_115699.1	chr1	156284278
AMEXTC_0340000275217_naxe.L	chr1	237.489		NAXE	NP_658985.2	chr1	156591765
AMEXTC_0340000000874_NECTIN4	chr1	239.617		NECTIN4	NP_112178.2	chr1	161070990
AMEXTC_0340000015936_VANGL2	chr1	239.617		VANGL2	NP_065068.1	chr1	160400573
AMEXTC_0340000052620_NCSTN	chr1	239.617		NCSTN	NP_056146.1	chr1	160343272
AMEXTC_0340000059227_PEX19	chr1	239.617		PEX19	NP_002848.1	chr1	160276808
AMEXTC_0340000137772_DCAF8	chr1	239.617		DCAF8	NP_056541.2	chr1	160215714
AMEXTC_0340000155970_LOC104062839	chr1	239.617		DNAJA1	NP_001530.1	chr9	33025202
AMEXTC_0340000158726_ppox	chr1	239.617		PPOX	NP_000300.1	chr1	161166380
AMEXTC_0340000241512_vacuolar	chr1	239.617		ATP6V1A	NP_001681.2	chr3	113747018
AMEXTC_0340000013876_KCNJ9	chr1	241.745		KCNJ6	NP_002231.1	chr21	37624222
AMEXTC_0340000013876_KCNJ9	chr1	241.745		KCNJ9	NP_004974.2	chr1	160081569
AMEXTC_0340000065510_LOC105862709	chr1	241.745		ITLN1	NP_060095.2	chr1	160876539
AMEXTC_0340000059389_LOC104405384	chr1	243.873		AP1G1	NP_001119.3	chr16	71729001
AMEXTC_0340000158778_ATXN1L	chr1	243.873		ATXN1L	NP_001131147.1	chr16	71845990
AMEXTC_0340000171902_ZNF821	chr1	243.873		ZNF821	NP_060000.1	chr16	71859679
AMEXTC_0340000196081_IST1	chr1	243.873		IST1	NP_055576.2	chr16	71895492
AMEXTC_0340000219227_PHLPP2	chr1	243.873		PHLPP2	NP_055835.2	chr16	71644925
AMEXTC_0340000005760_ZFHX3	chr1	246.001		ZFHX3	NP_008816.3	chr16	72782886
AMEXTC_0340000050637_HNRNPK	chr1	246.001		HNRNPK	NP_002131.2	chr9	83968082
AMEXTC_0340000088074_LOC102562298	chr1	246.001		ZFHX3	NP_008816.3	chr16	72782886
AMEXTC_0340000296016_ZFHX3	chr1	246.001		ZFHX3	NP_008816.3	chr16	72782886
AMEXTC_0340000019117_LOC101945697	chr1	250.352		CDH1	NP_004351.1	chr16	68737289
AMEXTC_0340000027745_SNTB2	chr1	250.352		SNTB2	NP_006741.1	chr16	69187146
AMEXTC_0340000036886_WWP2	chr1	250.352		WWP2	NP_008945.2	chr16	69762283
AMEXTC_0340000045678_NFAT5	chr1	250.352		NFAT5	NP_006590.1	chr16	69565965
AMEXTC_0340000050186_NOB1	chr1	250.352		NOB1	NP_054781.1	chr16	69741853
AMEXTC_0340000061044_UTP4	chr1	250.352		UTP4	NP_116219.2	chr16	69132595
AMEXTC_0340000125111_NIP7	chr1	250.352		NIP7	NP_057185.1	chr16	69339511
AMEXTC_0340000125112_TMED6	chr1	250.352		TMED6	NP_653277.2	chr16	69343245
AMEXTC_0340000126432_LOC101942423	chr1	250.352		CDH1	NP_004351.1	chr16	68737289
AMEXTC_0340000164733_GAS8	chr1	250.352		GAS8	NP_001472.1	chr16	90022599
AMEXTC_0340000190016_DEF8	chr1	250.352		DEF8	NP_997397.1	chr16	89948730
AMEXTC_0340000214192_TANGO6	chr1	250.352		TANGO6	NP_078838.1	chr16	68843605
AMEXTC_0340000214550_IPO11	chr1	250.352		IPO11	NP_057422.3	chr5	62412745
AMEXTC_0340000250470_cdh1.S	chr1	250.352		CDH1	NP_004351.1	chr16	68737289
AMEXTC_0340000283973_CHMP1A	chr1	250.352		CHMP1A	NP_002759.2	chr16	89644430
AMEXTC_0340000044111_CBFA2T3	chr1	259.2		CBFA2T3	NP_787127.1	chr16	88874854
AMEXTC_0340000057720_LOC101348352	chr1	259.2		ACSF3	NP_777577.2	chr16	89093808
AMEXTC_0340000064650_CDH15	chr1	259.2		CDH15	NP_004924.1	chr16	89171754
AMEXTC_0340000201108_ALKBH3	chr1	259.2		ALKBH3	NP_631917.1	chr11	43880806
AMEXTC_0340000004345_APRT	chr1	263.619		APRT	NP_000476.1	chr16	88809468
AMEXTC_0340000026566_SPG7	chr1	263.619		SPG7	NP_003110.1	chr16	89508387
AMEXTC_0340000028314_ANKRD11	chr1	263.619		ANKRD11	NP_037407.4	chr16	89267620
AMEXTC_0340000163610_PIEZO1	chr1	263.619		PIEZO1	NP_001136336.2	chr16	88715337
AMEXTC_0340000224795_CTU2	chr1	263.619		CTU2	NP_001012777.1	chr16	88706462
AMEXTC_0340000051275_ZNF469	chr1	269.892		ZNF469	NP_001120936.2	chr16	88427470
AMEXTC_0340000190215_ZFPM1	chr1	269.892		ZFPM1	NP_722520.2	chr16	88453605
AMEXTC_0340000010213_JPH3	chr1	274.598		JPH3	NP_065706.2	chr16	87602886
AMEXTC_0340000016272_ZCCHC14	chr1	274.598		ZCCHC2	NP_060212.4	chr18	62523424
AMEXTC_0340000035899_crispld2.S	chr1	274.598		CRISPLD2	NP_113664.1	chr16	84819980
AMEXTC_0340000048974_atp2c2.L	chr1	274.598		ATP2C2	NP_055676.3	chr16	84368522
AMEXTC_0340000174200_KLHL36	chr1	274.598		COTL1	NP_066972.1	chr16	84565597
AMEXTC_0340000186698_USP10	chr1	274.598		USP10	NP_005144.2	chr16	84699948
AMEXTC_0340000225046_CA5A	chr1	274.598		CA5B	NP_009151.1	chrX	15738288
AMEXTC_0340000234920_ZDHHC7	chr1	274.598		ZDHHC7	NP_060210.2	chr16	84974460
AMEXTC_0340000025242_dusp22a.L	chr1	276.726		DUSP22	NP_064570.1	chr6	292056
AMEXTC_0340000032624_IRF8	chr1	276.726		IRF8	NP_002154.1	chr16	85899167
AMEXTC_0340000039639_emc8	chr1	276.726		EMC8	NP_006058.1	chr16	85778624
AMEXTC_0340000117962_fut2	chr1	276.726		FUT1	NP_000139.1	chr19	48748010
AMEXTC_0340000224545_LOC104469002	chr1	276.726		COX4I1	NP_001852.1	chr16	85799566
AMEXTC_0340000248319_GSE1	chr1	276.726		GSE1	NP_055430.1	chr16	85613129
AMEXTC_0340000060469_LOC102381265	chr1	289.25		KRAS	NP_004976.2	chr12	25204788
AMEXTC_0340000054381_LOC108695911	chr1	296.912		TLR3	NP_003256.1	chr4	186069154
AMEXTC_0340000200321_cyth1	chr1	296.912		CYTH2	NP_004219.3	chr19	48469207
AMEXTC_0340000017459_socs3	chr1	301.308		SOCS3	NP_003946.3	chr17	78356776
AMEXTC_0340000113209_LOC102946679	chr1	301.308		RPS9	NP_001004.2	chr19	54200857
AMEXTC_0340000166094_MTHFSD	chr1	301.308		MTHFSD	NP_073601.2	chr16	86530175
AMEXTC_0340000174677_mboat7	chr1	301.308		MBOAT7	NP_077274.3	chr19	54173411
AMEXTC_0340000019380_plekha4	chr1	303.436		PLEKHA4	NP_065955.2	chr19	48837096
AMEXTC_0340000029989_LENG8	chr1	303.436		LENG8	NP_443157.1	chr19	54449161
AMEXTC_0340000043869_LOC108697262	chr1	303.436		MYBPC2	NP_004524.3	chr19	50432902
AMEXTC_0340000181346_HSD17B14	chr1	303.436		HSD17B14	NP_057330.2	chr19	48813016
AMEXTC_0340000012815_lmtk3	chr1	304.393		LMTK3	NP_001073903.1	chr19	48485270
AMEXTC_0340000156429_LOC108696775	chr1	305.542		TMEM143	NP_060743.2	chr19	48332355
AMEXTC_0340000226872_tsen34.L	chr1	305.542		TSEN34	NP_076980.2	chr19	54190267
AMEXTC_0340000236587_GRIN2D	chr1	305.542		GRIN2D	NP_000827.2	chr19	48394874
AMEXTC_0340000240327_KDELR1	chr1	305.542		KDELR1	NP_006792.1	chr19	48382569
AMEXTC_0340000005235_NFATC1	chr1	312.254		NFATC1	NP_006153.2	chr18	79395771
AMEXTC_0340000007630_LOC107157478	chr1	314.414		CLEC4M	NP_055072.3	chr19	7763148
AMEXTC_0340000064326_LOC102382167	chr1	314.414		ZSWIM9	NP_955373.3	chr19	48170691
AMEXTC_0340000002822_eps8l1.L	chr1	320.893		EPS8L1	NP_573441.2	chr19	55075852
AMEXTC_0340000015743_cd37	chr1	320.893		CD82	NP_002222.1	chr11	44565590
AMEXTC_0340000052630_fut2.S	chr1	320.893		FUT2	NP_000502.4	chr19	48695970
AMEXTC_0340000191205_cardiac	chr1	320.893		TNNI3	NP_000354.4	chr19	55151767
AMEXTC_0340000020914_brsk1	chr1	323.021		BRSK1	NP_115806.1	chr19	55284165
AMEXTC_0340000020914_brsk1	chr1	323.021		BRSK2	NP_003948.2	chr11	1389898
AMEXTC_0340000024009_ppp6r1	chr1	323.021		PPP6R1	NP_055746.3	chr19	55229778
AMEXTC_0340000041595_LOC108795149	chr1	323.021		FUT2	NP_000502.4	chr19	48695970
AMEXTC_0340000131615_dnaJ-like	chr1	323.021		DNAJC1	NP_071760.2	chr10	21756547
AMEXTC_0340000238038_LOC101733761	chr1	323.021		ZNF197	NP_008922.1	chr3	44625018
AMEXTC_0340000238038_LOC101733761	chr1	323.021		ZNF660-ZNF197	NP_001338661.1	chr3	44584849
AMEXTC_0340000260391_HSPBP1	chr1	323.021		HSPBP1	NP_036399.3	chr19	55262222
AMEXTC_0340000049484_rps27a	chr1	326.863		RPS27A	NP_002945.1	chr2	55232404
AMEXTC_0340000077165_mtif2.L	chr1	326.863		MTIF2	NP_002444.2	chr2	55236619
AMEXTC_0340000208416_CLHC1	chr1	326.863		CLHC1	NP_689598.2	chr2	55172550
AMEXTC_0340000021506_PNAT10	chr1	337.411		NAT1	NP_000653.3	chr8	18210102
AMEXTC_0340000001709_PLCG2	chr1	342		PLCG2	NP_002652.2	chr16	81779257
AMEXTC_0340000015217_mphosph6.L	chr1	342		MPHOSPH6	NP_005783.2	chr16	82148161
AMEXTC_0340000026271_LOC103052333	chr1	342		PLA2G4C	NP_003697.2	chr19	48047842
AMEXTC_0340000047405_CDH13	chr1	342		CDH13	NP_001248.1	chr16	82626793
AMEXTC_0340000061890_SDR42E1	chr1	342		SDR42E1	NP_660151.2	chr16	81997645
AMEXTC_0340000169220_CMIP	chr1	342		CMIP	NP_938204.2	chr16	81445169
AMEXTC_0340000051496_LOC108714094	chr1	344.972		TMEM67	NP_714915.3	chr8	93754843
AMEXTC_0340000004259_ZBTB45	chr1	349.323		ZBTB20	NP_056457.3	chr3	114314499
AMEXTC_0340000008689_slc7a10	chr1	349.323		SLC7A10	NP_062823.1	chr19	33208663
AMEXTC_0340000048069_LOC107552765	chr1	349.323		CHMP2A	NP_055268.1	chr19	58551565
AMEXTC_0340000177506_GPATCH1	chr1	349.323		GPATCH1	NP_060495.2	chr19	33080879
AMEXTC_0340000217017_thap7.S	chr1	349.323		THAP7	NP_085050.2	chr22	20999771
AMEXTC_0340000005925_CHST8	chr1	351.451		CHST8	NP_071912.2	chr19	33684527
AMEXTC_0340000122094_PEPD	chr1	351.451		PEPD	NP_000276.2	chr19	33386948
AMEXTC_0340000002960_NOD2	chr1	353.579		NOD2	NP_071445.1	chr16	50697138
AMEXTC_0340000053128_NKD1	chr1	353.579		NKD1	NP_149110.1	chr16	50548329
AMEXTC_0340000079565_kiaa0355	chr1	353.579		KIAA0355	NP_055501.2	chr19	34254550
AMEXTC_0340000223554_Transcription	chr1	353.579		TAF4	NP_003176.2	chr20	61974797
AMEXTC_0340000007196_LOC109091304	chr1	360.035		CHD9	NP_079410.4	chr16	53054992
AMEXTC_0340000027111_CHD9	chr1	360.035		CHD9	NP_079410.4	chr16	53054992
AMEXTC_0340000054889_CHD9	chr1	360.035		CHD9	NP_079410.4	chr16	53054992
AMEXTC_0340000000146_irx5	chr1	362.163		IRX5	NP_005844.4	chr16	54931198
AMEXTC_0340000014838_LOC108696816	chr1	362.163		GPR1	NP_005270.2	chr2	206175315
AMEXTC_0340000018903_kcnn4	chr1	362.163		KCNN3	NP_002240.3	chr1	154697465
AMEXTC_0340000029285_MMP2	chr1	362.163		MMP2	NP_004521.1	chr16	55479168
AMEXTC_0340000030453_NFATC3	chr1	362.163		NFATC3	NP_004546.1	chr16	68085365
AMEXTC_0340000031219_LOC108714028	chr1	362.163		HTR3C	NP_570126.2	chr3	184053046
AMEXTC_0340000038853_FTO	chr1	362.163		FTO	NP_001073901.1	chr16	53703962
AMEXTC_0340000055597_TRADD	chr1	362.163		TRADD	NP_003780.1	chr16	67154185
AMEXTC_0340000057183_SLC12A4	chr1	362.163		SLC12A4	NP_005063.1	chr16	67943473
AMEXTC_0340000059540_BBS2	chr1	362.163		BBS2	NP_114091.3	chr16	56484346
AMEXTC_0340000130259_Herpud1	chr1	362.163		HERPUD1	NP_055500.1	chr16	56932089
AMEXTC_0340000143343_GNAO1	chr1	362.163		GNAO1	NP_620073.2	chr16	56191338
AMEXTC_0340000146842_NUDT21	chr1	362.163		NUDT21	NP_008937.1	chr16	56429135
AMEXTC_0340000154951_ppp2r1a	chr1	362.163		PPP2R1A	NP_055040.2	chr19	52189801
AMEXTC_0340000158274_C15H16orf70	chr1	362.163		C16orf70	NP_079463.2	chr16	67109991
AMEXTC_0340000182903_DDX28	chr1	362.163		DDX28	NP_060850.2	chr16	68021273
AMEXTC_0340000214417_LOC110313547	chr1	362.163		ZNF182	NP_008893.1	chrX	47974850
AMEXTC_0340000238727_RPGRIP1L	chr1	362.163		RPGRIP1L	NP_056087.2	chr16	53599238
AMEXTC_0340000280189_OGFOD1	chr1	362.163		OGFOD1	NP_060703.3	chr16	56451511
AMEXTC_0340000284740_NUP93	chr1	362.163		NUP93	NP_055484.3	chr16	56730104
AMEXTC_0340000164360_LOC110089618	chr1	370.98		HSPA8	NP_006588.1	chr11	123057491
AMEXTC_0340000059226_LOC102947794	chr1	380.094		LYPD3	NP_055215.2	chr19	43460793
AMEXTC_0340000067123_ETHE1	chr1	380.094		ETHE1	NP_055112.2	chr19	43506718
AMEXTC_0340000158961_LOC100027742	chr1	380.094		ZNF107	NP_057304.1	chr7	64666082
AMEXTC_0340000158961_LOC100027742	chr1	380.094		ZNF429	NP_001333841.1	chr19	21505551
AMEXTC_0340000158963_LOC101950676	chr1	380.094		ZNF675	NP_612203.2	chr19	23652905
AMEXTC_0340000214182_phldb3.S	chr1	380.094		PHLDB3	NP_942147.3	chr19	43475102
AMEXTC_0340000237307_LOC101935434	chr1	380.094		GBP1	NP_002044.2	chr1	89052303
AMEXTC_0340000247593_LOC108785514	chr1	380.094		TMPRSS13	NP_001070731.1	chr11	117900640
AMEXTC_0340000207951_PMEPA1	chr1	382.222		PMEPA1	NP_064567.2	chr20	57648391
AMEXTC_0340000039245_LOC106550989	chr1	384.35		ATP1A3	NP_689509.1	chr19	41966581
AMEXTC_0340000044914_grik5	chr1	384.35		GRIK5	NP_002079.3	chr19	41998315
AMEXTC_0340000055718_LOC102349733	chr1	386.652		ZNF574	NP_073589.4	chr19	42076137
AMEXTC_0340000193902_lipe	chr1	412.572		LIPE	NP_005348.2	chr19	42401506
AMEXTC_0340000200855_LOC102459912	chr1	412.572		CEACAM20	NP_001096067.2	chr19	44506158
AMEXTC_0340000236512_MEGF8	chr1	412.572		MEGF8	NP_001401.2	chr19	42325608
AMEXTC_0340000180085_CBLC	chr1	414.7		CBL	NP_005179.2	chr11	119206275
AMEXTC_0340000180085_CBLC	chr1	414.7		CBLB	NP_733762.2	chr3	105655460
AMEXTC_0340000207235_atp12a-like	chr1	419.062		ATP12A	NP_001667.4	chr13	24680410
AMEXTC_0340000051098_ALDH9A1	chr1	421.201		ALDH9A1	NP_000687.3	chr1	165662211
AMEXTC_0340000063146_xcxcra	chr1	421.201		CXCR3	NP_001495.1	chrX	71615915
AMEXTC_0340000076399_TRMT1L	chr1	421.201		TRMT1L	NP_112196.3	chr1	185118085
AMEXTC_0340000181016_lrrc52	chr1	421.201		LRRC52	NP_001005214.2	chr1	165544240
AMEXTC_0340000225319_LOC102367138	chr1	421.201		DDX6	NP_004388.2	chr11	118747763
AMEXTC_0340000284718_BCAM	chr1	421.201		BCAM	NP_005572.2	chr19	44809058
AMEXTC_0340000023686_EDEM3	chr1	423.329		EDEM3	NP_079467.3	chr1	184690490
AMEXTC_0340000051803_RNF2	chr1	423.329		RNF2	NP_009143.1	chr1	185045418
AMEXTC_0340000052553_FAM129A	chr1	423.329		FAM129A	NP_443198.1	chr1	184791024
AMEXTC_0340000178695_COLGALT2	chr1	423.329		COLGALT2	NP_055916.1	chr1	183935831
AMEXTC_0340000008885_FAM78B	chr1	425.457		FAM78B	NP_001017961.1	chr1	166069298
AMEXTC_0340000034762_Roquin	chr1	425.457		SERPINC1	NP_000479.1	chr1	173903803
AMEXTC_0340000043014_fmo5.S	chr1	425.457		FMO2	NP_001451.2	chr1	171185207
AMEXTC_0340000113273_LOC106737209	chr1	425.457		FMO5	NP_001452.2	chr1	147186260
AMEXTC_0340000001288_RC3H1	chr1	427.585		RC3H1	NP_742068.1	chr1	173931083
AMEXTC_0340000049684_RABGAP1L	chr1	427.585		RABGAP1L	NP_001230694.1	chr1	174799896
AMEXTC_0340000060858_LOC101937948	chr1	427.585		HEBP2	NP_055135.1	chr6	138404198
AMEXTC_0340000085584_LOC108786287	chr1	427.585		TNN	NP_071376.1	chr1	175067857
AMEXTC_0340000202345_ZBTB37	chr1	427.585		ZBTB37	NP_001116242.1	chr1	173868296
AMEXTC_0340000206411_DARS2	chr1	427.585		DARS2	NP_060592.2	chr1	173824658
AMEXTC_0340000043486_TNR	chr1	429.713		TNR	NP_003276.3	chr1	175322798
AMEXTC_0340000025923_ASTN1	chr1	434.063		ASTN1	NP_004310.1	chr1	176861063
AMEXTC_0340000029521_PAPPA2	chr1	434.063		PAPPA2	NP_064714.2	chr1	176463170
AMEXTC_0340000005148_KLHL20	chr1	436.191		KLHL20	NP_055273.2	chr1	173714940
AMEXTC_0340000030219_RALGPS2	chr1	436.191		RALGPS2	NP_689876.2	chr1	178725146
AMEXTC_0340000139872_fam20b	chr1	436.191		FAM20B	NP_055679.1	chr1	179025938
AMEXTC_0340000139873_FAM20B	chr1	436.191		FAM20B	NP_055679.1	chr1	179025938
AMEXTC_0340000208105_transcriptional	chr1	436.191		TADA1	NP_444281.1	chr1	166856511
AMEXTC_0340000212461_LOC102454389	chr1	436.191		TP53I3	NP_004872.2	chr2	24077432
AMEXTC_0340000213136_ANKRD45	chr1	436.191		ANKRD45	NP_940895.1	chr1	173608335
AMEXTC_0340000214584_rasal2	chr1	436.191		RASAL2	NP_004832.1	chr1	178341470
AMEXTC_0340000014765_CAMSAP2	chr1	438.319		CAMSAP2	NP_001284636.1	chr1	200739557
AMEXTC_0340000040051_KIF14	chr1	438.319		KIF14	NP_055690.1	chr1	200551496
AMEXTC_0340000050122_ARHGAP29	chr1	438.319		ARHGAP29	NP_004806.3	chr1	94168906
AMEXTC_0340000050247_LOC108790013	chr1	438.319		NR5A2	NP_003813.1	chr1	200027601
AMEXTC_0340000059441_tissue	chr1	438.319		F3	NP_001984.1	chr1	94529175
AMEXTC_0340000179400_DDX59	chr1	438.319		DDX59	NP_001026895.2	chr1	200644036
AMEXTC_0340000003460_MYOC	chr1	440.447		MYOC	NP_000252.1	chr1	171635416
AMEXTC_0340000019702_nuf2.L	chr1	440.447		NUF2	NP_113611.2	chr1	163321932
AMEXTC_0340000027585_PTPRC	chr1	440.447		PTPRC	NP_002829.3	chr1	198638967
AMEXTC_0340000060687_tmem56.S	chr1	440.447		TMEM56	NP_689700.1	chr1	95117337
AMEXTC_0340000147461_ITPA	chr1	440.447		ITPA	NP_258412.1	chr20	3209359
AMEXTC_0340000171666_DUSP12	chr1	442.554		DUSP12	NP_009171.1	chr1	161749767
AMEXTC_0340000025293_OLFML2B	chr1	442.554		OLFML2B	NP_056256.1	chr1	161983191
AMEXTC_0340000014787_PRKAB2	chr1	444.703		PRKAB2	NP_005390.1	chr1	147155105
AMEXTC_0340000021189_prrx1	chr1	444.703		PRRX1	NP_073207.1	chr1	170664171
AMEXTC_0340000040461_KIFAP3	chr1	444.703		KIFAP3	NP_055785.2	chr1	169921328
AMEXTC_0340000181277_LOC101942176	chr1	444.703		PDE4DIP	NP_001002811.2	chr1	148952123
AMEXTC_0340000210310_SEC22B	chr1	444.703		SEC22B	NP_004883.3	chr1	120155941
AMEXTC_0340000238518_SCYL3	chr1	444.703		SCYL3	NP_065156.5	chr1	169853075
AMEXTC_0340000010767_rgs2.L	chr1	462.182		RGS2	NP_002914.1	chr1	192809038
AMEXTC_0340000024053_B3GALT2	chr1	462.182		B3GALT2	NP_003774.1	chr1	193178729
AMEXTC_0340000026641_rgs13	chr1	462.182		RGS13	NP_002918.1	chr1	192636137
AMEXTC_0340000132938_HMCN1	chr1	462.182		HMCN1	NP_114141.2	chr1	185734550
AMEXTC_0340000134508_HMCN1	chr1	462.182		HMCN1	NP_114141.2	chr1	185734550
AMEXTC_0340000148924_HMCN1	chr1	462.182		HMCN1	NP_114141.2	chr1	185734550
AMEXTC_0340000175653_HMCN1	chr1	462.182		HMCN1	NP_114141.2	chr1	185734550
AMEXTC_0340000215735_SWT1	chr1	462.182		SWT1	NP_060143.4	chr1	185157158
AMEXTC_0340000223426_HMCN1	chr1	462.182		HMCN1	NP_114141.2	chr1	185734550
AMEXTC_0340000250174_TPR	chr1	462.182		TPR	NP_003283.2	chr1	186311653
AMEXTC_0340000284702_influenza	chr1	462.182		IVNS1ABP	NP_006460.2	chr1	185296387
AMEXTC_0340000013066_PTGS2	chr1	463.373		PTGS2	NP_000954.1	chr1	186671811
AMEXTC_0340000013888_SMG7	chr1	464.288		SMG7	NP_775179.1	chr1	183472370
AMEXTC_0340000024148_MSRB3	chr1	464.288		MSRB3	NP_932346.1	chr12	65278642
AMEXTC_0340000047122_pla2g4a	chr1	464.288		PLA2G4A	NP_077734.1	chr1	186828899
AMEXTC_0340000054310_NCF2	chr1	464.288		NCF2	NP_000424.2	chr1	183555561
AMEXTC_0340000267522_LAMC1	chr1	464.288		LAMC1	NP_002284.3	chr1	183023459
AMEXTC_0340000028766_RGS8	chr1	465.319		RGS8	NP_203131.1	chr1	182641813
AMEXTC_0340000195008_znf91	chr1	465.319		ZNF184	NP_009080.2	chr6	27450741
AMEXTC_0340000205712_glul	chr1	465.319		GLUL	NP_002056.2	chr1	182378092
AMEXTC_0340000259528_DHX9	chr1	465.319		DHX9	NP_001348.2	chr1	182839303
AMEXTC_0340000007995_hypothetical	chr1	466.393		CACNA1E	NP_000712.2	chr1	181483549
AMEXTC_0340000030228_LOC102449075	chr1	470.744		CFH	NP_000177.2	chr1	196651877
AMEXTC_0340000045501_XPR1	chr1	470.744		XPR1	NP_004727.2	chr1	180632009
AMEXTC_0340000064113_LOC104386128	chr1	470.744		ADAMTSL2	NP_055509.2	chr9	133534852
AMEXTC_0340000227232_ACBD6	chr1	470.744		ACBD6	NP_115736.1	chr1	180288216
AMEXTC_0340000019446_LIM/homeobox	chr1	479.548		LHX9	NP_064589.2	chr1	197917386
AMEXTC_0340000029400_ASPM	chr1	479.548		ASPM	NP_060606.3	chr1	197084126
AMEXTC_0340000058525_ZBTB41	chr1	479.548		ZBTB41	NP_919290.2	chr1	197153683
AMEXTC_0340000198671_DENND1B	chr1	479.548		DENND1B	NP_001182144.1	chr1	197504748
AMEXTC_0340000057715_dpyd	chr1	483.899		DPYD	NP_000101.2	chr1	97077743
AMEXTC_0340000252657_RWDD3	chr1	483.899		RWDD3	NP_056300.2	chr1	95234154
AMEXTC_0340000006992_PALMD	chr1	486.027		PALMD	NP_060204.1	chr1	99645874
AMEXTC_0340000238677_AGL	chr1	488.155		AGL	NP_000019.2	chr1	99850488
AMEXTC_0340000035317_slc30a7.L	chr1	490.283		SLC30A7	NP_598003.2	chr1	100896077
AMEXTC_0340000037783_S1PR1	chr1	490.283		S1PR1	NP_001391.2	chr1	101236748
AMEXTC_0340000041363_DNASE2B	chr1	490.283		DNASE2B	NP_067056.2	chr1	84398531
AMEXTC_0340000051589_COL11A1	chr1	490.283		COL11A1	NP_001845.3	chr1	102876466
AMEXTC_0340000052186_LOC101482575	chr1	490.283		PRKACA	NP_002721.1	chr19	14091694
AMEXTC_0340000052186_LOC101482575	chr1	490.283		PRKACB	NP_002722.1	chr1	84077974
AMEXTC_0340000082578_SLC35A3	chr1	490.283		SLC35A3	NP_036375.1	chr1	99969788
AMEXTC_0340000131899_TRMT13	chr1	490.283		TRMT13	NP_061956.2	chr1	100133149
AMEXTC_0340000136967_DBT	chr1	490.283		DBT	NP_001909.3	chr1	100186921
AMEXTC_0340000158043_ADGRL2	chr1	490.283		ADGRL2	NP_001317574.1	chr1	81800396
AMEXTC_0340000209020_SASS6	chr1	490.283		SASS6	NP_919268.1	chr1	100083545
AMEXTC_0340000221450_DPH5	chr1	490.283		DPH5	NP_057042.2	chr1	100989624
AMEXTC_0340000248993_RTCA	chr1	490.283		RTCA	NP_003720.1	chr1	100266157
AMEXTC_0340000001729_NEXN	chr1	492.411		NEXN	NP_653174.3	chr1	77888514
AMEXTC_0340000005338_ak5	chr1	492.411		AK5	NP_036225.2	chr1	77282601
AMEXTC_0340000036854_Fubp1	chr1	492.411		FUBP1	NP_003893.2	chr1	77948401
AMEXTC_0340000055956_LOC102942540	chr1	492.411		IFI44L	NP_006811.2	chr1	78620381
AMEXTC_0340000042659_LOC100564731	chr1	496.667		COL24A1	NP_690850.2	chr1	85729232
AMEXTC_0340000257024_cysteine-rich	chr1	496.667		CYR61	NP_001545.2	chr1	85580760
AMEXTC_0340000036721_WDR63	chr1	507.714		WDR63	NP_660155.2	chr1	85062297
AMEXTC_0340000158657_CEP83	chr1	507.714		CEP83	NP_057206.2	chr12	94308279
AMEXTC_0340000179166_tmcc3	chr1	507.714		TMCC3	NP_065749.2	chr12	94567123
AMEXTC_0340000185927_bcl10	chr1	507.714		BCL10	NP_003912.1	chr1	85265775
AMEXTC_0340000227567_SYDE2	chr1	507.714		SYDE2	NP_115560.1	chr1	85157672
AMEXTC_0340000001210_SLC25A24	chr1	509.842		SLC25A24	NP_037518.3	chr1	108134721
AMEXTC_0340000003574_CLCC1	chr1	509.842		CLCC1	NP_001041675.1	chr1	108929507
AMEXTC_0340000010147_CCDC18	chr1	509.842		CCDC18	NP_001293005.1	chr1	93180715
AMEXTC_0340000026499_LRRC8D	chr1	509.842		LRRC8D	NP_060573.2	chr1	89821920
AMEXTC_0340000027634_BCAR3	chr1	509.842		BCAR3	NP_003558.1	chr1	93561785
AMEXTC_0340000031204_LOC102935576	chr1	509.842		FNDC7	NP_001138409.1	chr1	108712933
AMEXTC_0340000041054_LOC102685057	chr1	509.842		FNDC7	NP_001138409.1	chr1	108712933
AMEXTC_0340000042256_lrrc8b	chr1	509.842		LRRC8B	NP_056165.1	chr1	89558712
AMEXTC_0340000044618_GPSM2	chr1	509.842		GPSM2	NP_037428.3	chr1	108876980
AMEXTC_0340000046166_LOC104489843	chr1	509.842		GFI1	NP_005254.2	chr1	92473044
AMEXTC_0340000047831_Guanine	chr1	509.842		VAV3	NP_006104.4	chr1	107571159
AMEXTC_0340000050546_Zfp326	chr1	509.842		ZNF326	NP_892021.1	chr1	89995094
AMEXTC_0340000075792_VAV3	chr1	509.842		VAV3	NP_006104.4	chr1	107571159
AMEXTC_0340000131926_FNBP1L	chr1	509.842		FNBP1L	NP_060207.2	chr1	93448130
AMEXTC_0340000139919_RPL5	chr1	509.842		RPL5	NP_000960.2	chr1	92831985
AMEXTC_0340000142932_transmembrane	chr1	509.842		TMED5	NP_057124.3	chr1	93149741
AMEXTC_0340000157496_LRRC8C	chr1	509.842		LRRC8C	NP_115646.2	chr1	89633084
AMEXTC_0340000178005_prpf38b	chr1	509.842		PRPF38B	NP_060531.2	chr1	108692309
AMEXTC_0340000211086_STXBP3	chr1	509.842		STXBP3	NP_009200.2	chr1	108746634
AMEXTC_0340000228367_CDC7	chr1	509.842		CDC7	NP_003494.1	chr1	91500846
AMEXTC_0340000263262_LOC101936064	chr1	509.842		RDH8	NP_056540.2	chr19	10013248
AMEXTC_0340000291944_WDR47	chr1	509.842		WDR47	NP_055784.3	chr1	108970215
AMEXTC_0340000024746_RABGGTB	chr1	525.659		RABGGTB	NP_004573.2	chr1	75786193
AMEXTC_0340000061458_lrriq3	chr1	525.659		LRRIQ3	NP_001099129.1	chr1	74026017
AMEXTC_0340000180238_CRYZ	chr1	525.659		CRYZ	NP_001880.2	chr1	74705487
AMEXTC_0340000181937_srsf11	chr1	525.659		SRSF11	NP_001337537.1	chr1	70205681
AMEXTC_0340000259166_RNPC3	chr1	525.659		RNPC3	NP_060089.1	chr1	103525955
AMEXTC_0340000291935_LRRC40	chr1	525.659		LRRC40	NP_060238.3	chr1	70144801
AMEXTC_0340000034351_slc35d1.L	chr1	527.787		SLC35D1	NP_055954.1	chr1	66999331
AMEXTC_0340000035115_PDE4B	chr1	527.787		PDE4B	NP_001032416.1	chr1	66332107
AMEXTC_0340000158853_DEPDC1	chr1	527.787		DEPDC1	NP_001107592.1	chr1	68474151
AMEXTC_0340000195863_serbp1	chr1	527.787		SERBP1	NP_001018079.1	chr1	67407809
AMEXTC_0340000237866_SGIP1	chr1	527.787		SGIP1	NP_115667.2	chr1	66533955
AMEXTC_0340000001132_JAK1	chr1	546.219		JAK1	NP_002218.2	chr1	64833222
AMEXTC_0340000024552_ROR1	chr1	546.219		ROR1	NP_005003.2	chr1	63774018
AMEXTC_0340000045489_CACHD1	chr1	546.219		CACHD1	NP_065976.2	chr1	64470792
AMEXTC_0340000027260_PATJ	chr1	548.347		PATJ	NP_795352.2	chr1	61742465
AMEXTC_0340000034579_KANK4	chr1	548.347		KANK4	NP_859063.3	chr1	62236164
AMEXTC_0340000046080_ANGPTL3	chr1	548.347		ANGPTL3	NP_055310.1	chr1	62597486
AMEXTC_0340000053991_LOC104912428	chr1	548.347		CYP2J2	NP_000766.2	chr1	59893307
AMEXTC_0340000148600_TM2D1	chr1	548.347		TM2D1	NP_114416.1	chr1	61681046
AMEXTC_0340000165985_LOC102352693	chr1	548.347		FREM1	NP_659403.4	chr9	14734665
AMEXTC_0340000174890_LOC104168799	chr1	548.347		ALG6	NP_037471.2	chr1	63367589
AMEXTC_0340000186044_USP1	chr1	548.347		USP1	NP_003359.3	chr1	62436711
AMEXTC_0340000301253_psma4	chr1	548.347		PSMA4	NP_002780.1	chr15	78540404
AMEXTC_0340000025943_dhcr24	chr1	550.475		DHCR24	NP_055577.1	chr1	54849626
AMEXTC_0340000028176_USP24	chr1	550.475		USP24	NP_056121.2	chr1	55066358
AMEXTC_0340000039550_PRKAA2	chr1	550.475		PRKAA2	NP_006243.2	chr1	56645316
AMEXTC_0340000059150_TTC22	chr1	550.475		TTC22	NP_001107580.1	chr1	54781078
AMEXTC_0340000172748_MYSM1	chr1	550.475		MYSM1	NP_001078956.1	chr1	58654738
AMEXTC_0340000177244_Oma1	chr1	550.475		OMA1	NP_660286.1	chr1	58480718
AMEXTC_0340000178867_Ttc4	chr1	550.475		TTC4	NP_004614.3	chr1	54715821
AMEXTC_0340000199376_ACOT11	chr1	550.475		ACOT11	NP_056362.1	chr1	54548133
AMEXTC_0340000199542_FYB2	chr1	550.475		FYB2	NP_001004303.3	chr1	56718803
AMEXTC_0340000228415_lexm	chr1	550.475		LEXM	NP_689820.2	chr1	54806062
AMEXTC_0340000159336_cpt2	chr1	551.242		CPT2	NP_000089.1	chr1	53196428
AMEXTC_0340000028159_DMRTA2	chr1	552.582		DMRTA2	NP_115486.1	chr1	50417550
AMEXTC_0340000045468_TTC39A	chr1	552.582		TTC39A	NP_001138304.1	chr1	51287257
AMEXTC_0340000055099_acsbg2	chr1	552.582		ACSBG2	NP_112186.3	chr19	6135632
AMEXTC_0340000061853_LOC110402521	chr1	552.582		ZYG11B	NP_078922.1	chr1	52726458
AMEXTC_0340000065878_yipf1	chr1	552.582		YIPF1	NP_061855.1	chr1	53851718
AMEXTC_0340000154343_LRRC42	chr1	552.582		LRRC42	NP_443172.1	chr1	53946325
AMEXTC_0340000260607_LOC102944079	chr1	552.582		COA7	NP_075565.2	chr1	52686341
AMEXTC_0340000300860_echdc2	chr1	552.582		ECHDC2	NP_001306887.1	chr1	52895909
AMEXTC_0340000156012_BEND5	chr1	556.838		BEND5	NP_078879.2	chr1	48727522
AMEXTC_0340000037835_slc5a9	chr1	563.515		SLC5A9	NP_001011547.2	chr1	48222684
AMEXTC_0340000015758_cmpk1	chr1	567.86		CMPK1	NP_057392.1	chr1	47333796
AMEXTC_0340000168350_cytochrome	chr1	567.86		CYP4A11	NP_000769.2	chr1	46929173
AMEXTC_0340000014886_MOB3C	chr1	569.988		MOB3C	NP_660322.2	chr1	46607714
AMEXTC_0340000016306_EFCAB14	chr1	569.988		EFCAB14	NP_055589.1	chr1	46675158
AMEXTC_0340000035359_cytochrome	chr1	569.988		CYP4B1	NP_000770.2	chr1	46798997
AMEXTC_0340000045456_cytochrome	chr1	569.988		CYP4B1	NP_000770.2	chr1	46798997
AMEXTC_0340000232968_LOC101952194	chr1	569.988		CYP4A11	NP_000769.2	chr1	46929173
AMEXTC_0340000064728_MKNK1	chr1	572.116		MKNK1	NP_001129025.1	chr1	46557406
AMEXTC_0340000036492_LOC101934307	chr1	574.244		FAAH	NP_001432.2	chr1	46394266
AMEXTC_0340000141013_faah.1	chr1	574.244		FAAH	NP_001432.2	chr1	46394266
AMEXTC_0340000010571_PIK3R3	chr1	580.909		PIK3R3	NP_003620.3	chr1	46040139
AMEXTC_0340000046757_MAST2	chr1	583.014		MAST2	NP_001311249.1	chr1	45803606
AMEXTC_0340000156506_SLC6A9	chr1	587.27		SLC6A9	NP_008865.2	chr1	43996482
AMEXTC_0340000131937_eri3	chr1	589.398		ERI3	NP_076971.1	chr1	44221069
AMEXTC_0340000132334_DMAP1	chr1	589.398		DMAP1	NP_061973.1	chr1	44213452
AMEXTC_0340000157262_RNF220	chr1	589.398		RNF220	NP_060620.2	chr1	44405159
AMEXTC_0340000266513_PLK3	chr1	589.398		PLK3	NP_004064.2	chr1	44800224
AMEXTC_0340000025902_ptch2	chr1	591.526		PTCH2	NP_003729.3	chr1	44822265
AMEXTC_0340000182500_LOC110402634	chr1	591.526		HECTD3	NP_078878.3	chr1	45002547
AMEXTC_0340000268472_EIF2B3	chr1	591.526		EIF2B3	NP_065098.1	chr1	44850521
AMEXTC_0340000047892_IPP	chr1	593.654		IPP	NP_005888.1	chr1	45698734
AMEXTC_0340000053823_TESK2	chr1	593.654		TESK2	NP_009101.2	chr1	45343882
AMEXTC_0340000060289_NASP	chr1	593.654		NASP	NP_002473.2	chr1	45583987
AMEXTC_0340000156893_ST3GAL3	chr1	593.654		ST3GAL3	NP_006270.1	chr1	43707496
AMEXTC_0340000202723_mutyh	chr1	593.654		MUTYH	NP_036354.1	chr1	45329241
AMEXTC_0340000246449_AKR1A1	chr1	593.654		AKR1A1	NP_006057.1	chr1	45550782
AMEXTC_0340000114416_elovl1.L	chr1	595.782		ELOVL1	NP_073732.1	chr1	43363396
AMEXTC_0340000209234_PTPRF	chr1	595.782		PTPRF	NP_002831.2	chr1	43530859
AMEXTC_0340000244085_SZT2	chr1	595.782		SZT2	NP_056099.3	chr1	43389884
AMEXTC_0340000269267_cdc20	chr1	595.782		CDC20	NP_001246.2	chr1	43358954
AMEXTC_0340000050923_LOC103281476	chr1	597.91		ZNF300	NP_443092.1	chr5	150894391
AMEXTC_0340000050923_LOC103281476	chr1	597.91		ZNF33B	NP_008886.1	chr10	42589083
AMEXTC_0340000050923_LOC103281476	chr1	597.91		ZNF84	NP_003419.3	chr12	133037285
AMEXTC_0340000061079_LOC107539397	chr1	597.91		ZNF84	NP_003419.3	chr12	133037285
AMEXTC_0340000203709_LOC104552082	chr1	597.91		GLIPR1	NP_006842.2	chr12	75480732
AMEXTC_0340000183559_ZNF282	chr2	2.128		ZNF467	NP_997219.1	chr7	149764181
AMEXTC_0340000216858_LOC107151831	chr2	2.128		ZNF569	NP_689697.2	chr19	37411157
AMEXTC_0340000003032_STAB1	chr2	6.479		STAB2	NP_060034.9	chr12	103587290
AMEXTC_0340000034187_STAB1	chr2	6.479		STAB1	NP_055951.2	chr3	52495339
AMEXTC_0340000062033_STAB1	chr2	6.479		STAB1	NP_055951.2	chr3	52495339
AMEXTC_0340000182042_NISCH	chr2	6.479		NISCH	NP_009115.2	chr3	52455507
AMEXTC_0340000267527_GLT8D1	chr2	6.479		GLT8D1	NP_060916.1	chr3	52694483
AMEXTC_0340000016006_PLXNB1	chr2	8.607		PLXNB1	NP_002664.2	chr3	48403853
AMEXTC_0340000017349_PDZRN3	chr2	8.607		PDZRN3	NP_055824.1	chr3	73382429
AMEXTC_0340000028963_LHFPL4	chr2	8.607		LHFPL4	NP_940962.1	chr3	9498360
AMEXTC_0340000045148_ALAS1	chr2	8.607		ALAS1	NP_000679.1	chr3	52198082
AMEXTC_0340000064950_LOC108788226	chr2	8.607		DNASE1L3	NP_004935.1	chr3	58192625
AMEXTC_0340000159284_LOC100144966	chr2	8.607		SRPK2	NP_872633.1	chr7	105116373
AMEXTC_0340000279807_poc1a	chr2	8.607		POC1A	NP_056241.3	chr3	52075232
AMEXTC_0340000293917_LOC102936992	chr2	8.607		BORCS6	NP_060092.2	chr17	8188332
AMEXTC_0340000301943_CCDC51	chr2	8.607		CCDC51	NP_078937.3	chr3	48432169
AMEXTC_0340000053455_JAGN1	chr2	12.862		JAGN1	NP_115881.3	chr3	9890586
AMEXTC_0340000118507_ogg1	chr2	12.862		OGG1	NP_058212.1	chr3	9749943
AMEXTC_0340000154548_BRPF1	chr2	12.862		BRPF1	NP_001003694.1	chr3	9731749
AMEXTC_0340000185008_IL17RE	chr2	12.862		IL17RE	NP_705613.1	chr3	9902827
AMEXTC_0340000187296_IL17RC	chr2	12.862		IL17RC	NP_703190.1	chr3	9917073
AMEXTC_0340000228533_LOC108714692	chr2	12.862		PRRT3	NP_997234.3	chr3	9945541
AMEXTC_0340000004428_lamb2	chr2	14.99		LAMB1	NP_002282.2	chr7	107923800
AMEXTC_0340000012797_slc6a8	chr2	14.99		SLC6A8	NP_005620.1	chrX	153688296
AMEXTC_0340000031192_LOC108714679	chr2	14.99		GPR22	NP_005286.2	chr7	107470056
AMEXTC_0340000049297_LOC101931205	chr2	14.99		SFRP5	NP_003006.2	chr10	97766750
AMEXTC_0340000057997_DALRD3	chr2	14.99		DALRD3	NP_060584.3	chr3	49015488
AMEXTC_0340000065635_ARIH2	chr2	14.99		ARIH2	NP_006312.1	chr3	48918819
AMEXTC_0340000221023_QRICH1	chr2	14.99		QRICH1	NP_060200.2	chr3	49029706
AMEXTC_0340000221063_LOC108715886	chr2	14.99		PIM1	NP_002639.1	chr6	37170145
AMEXTC_0340000231786_USP19	chr2	14.99		USP19	NP_001186090.1	chr3	49108045
AMEXTC_0340000269349_impdh2	chr2	14.99		IMPDH2	NP_000875.2	chr3	49024328
AMEXTC_0340000018381_IP6K2	chr2	19.341		IP6K2	NP_057375.2	chr3	48688002
AMEXTC_0340000022484_COL7A1	chr2	23.692		COL7A1	NP_000085.1	chr3	48564072
AMEXTC_0340000049601_CELSR3	chr2	23.692		CELSR3	NP_001398.2	chr3	48636462
AMEXTC_0340000107377_HMCES	chr2	23.692		HMCES	NP_064572.2	chr3	129278840
AMEXTC_0340000234468_NCKIPSD	chr2	23.692		NCKIPSD	NP_057537.1	chr3	48673838
AMEXTC_0340000260423_RAB7A	chr2	23.692		RAB7A	NP_004628.4	chr3	128726135
AMEXTC_0340000001191_MGLL	chr2	25.82		MGLL	NP_009214.1	chr3	127689061
AMEXTC_0340000018336_LOC108714668	chr2	25.82		FGL2	NP_006673.1	chr7	77193370
AMEXTC_0340000051033_rpn1	chr2	25.82		RPN1	NP_002941.1	chr3	128619969
AMEXTC_0340000052417_GATA2	chr2	25.82		GATA2	NP_116027.2	chr3	128479421
AMEXTC_0340000152551_NCKAP1	chr2	25.82		NCKAP1	NP_038464.1	chr2	182924850
AMEXTC_0340000222668_MCM2	chr2	25.82		MCM2	NP_004517.2	chr3	127598356
AMEXTC_0340000240195_EEFSEC	chr2	25.82		EEFSEC	NP_068756.2	chr3	128153456
AMEXTC_0340000248436_TPRA1	chr2	25.82		TPRA1	NP_001129525.1	chr3	127571231
AMEXTC_0340000250129_SEC61A1	chr2	25.82		SEC61A1	NP_037468.1	chr3	128052368
AMEXTC_0340000250129_SEC61A1	chr2	25.82		SEC61A2	NP_060614.2	chr10	12129640
AMEXTC_0340000227884_plxna1	chr2	27.948		PLXNA1	NP_115618.3	chr3	126988593
AMEXTC_0340000039259_CHST13	chr2	36.542		CHST11	NP_060883.1	chr12	104456913
AMEXTC_0340000042578_aldh1l1.L	chr2	36.542		ALDH1L1	NP_036322.2	chr3	126103560
AMEXTC_0340000042578_aldh1l1.L	chr2	36.542		ALDH1L2	NP_001029345.2	chr12	105019783
AMEXTC_0340000046116_TMEM43	chr2	36.542		TMEM43	NP_077310.1	chr3	14124939
AMEXTC_0340000054949_Solute	chr2	36.542		SLC41A3	NP_001008487.1	chr3	126006356
AMEXTC_0340000079429_LOC100032537	chr2	36.542		CHCHD4	NP_001091972.1	chr3	14112076
AMEXTC_0340000220994_ZXDC	chr2	36.542		ZXDA	NP_009087.1	chrX	57905429
AMEXTC_0340000220994_ZXDC	chr2	36.542		ZXDB	NP_009088.1	chrX	57591835
AMEXTC_0340000269295_UROC1	chr2	36.542		UROC1	NP_653240.1	chr3	126481164
AMEXTC_0340000294843_txnrd3	chr2	36.542		TXNRD3	NP_443115.1	chr3	126607051
AMEXTC_0340000042360_hypothetical	chr2	38.67		RHO	NP_000530.1	chr3	129528638
AMEXTC_0340000192586_GRIP2	chr2	38.67		GRIP2	NP_001073892.3	chr3	14489110
AMEXTC_0340000214680_PLXND1	chr2	38.67		PLXND1	NP_055918.2	chr3	129555212
AMEXTC_0340000251051_sec13	chr2	38.67		SEC13	NP_109598.2	chr3	10300928
AMEXTC_0340000008818_SRGAP3	chr2	47.52		SRGAP3	NP_055665.1	chr3	8980590
AMEXTC_0340000010402_LOC101947815	chr2	78.28		ITIH3	NP_002208.3	chr3	52794767
AMEXTC_0340000016868_LRRN1	chr2	78.28		LRRN1	NP_065924.3	chr3	3799430
AMEXTC_0340000019567_ITIH4	chr2	78.28		ITIH4	NP_002209.2	chr3	52812989
AMEXTC_0340000023945_WNK2	chr2	78.28		WNK2	NP_006639.3	chr9	93184929
AMEXTC_0340000025141_WNT7A	chr2	78.28		WNT7A	NP_004616.2	chr3	13818584
AMEXTC_0340000025379_PHF2	chr2	78.28		PHF2	NP_005383.3	chr9	93576626
AMEXTC_0340000029275_CHL1	chr2	78.28		CHL1	NP_001240316.1	chr3	196595
AMEXTC_0340000046628_PHF2	chr2	78.28		PHF2	NP_005383.3	chr9	93576626
AMEXTC_0340000053381_SFMBT1	chr2	78.28		SFMBT1	NP_057413.2	chr3	52903566
AMEXTC_0340000062211_PRKCD	chr2	78.28		PRKCD	NP_006245.2	chr3	53161206
AMEXTC_0340000062211_PRKCD	chr2	78.28		PRKCQ	NP_001229342.1	chr10	6427142
AMEXTC_0340000171823_LOC102931631	chr2	78.28		BOD1	NP_612378.1	chr5	173607144
AMEXTC_0340000185502_PFKFB4	chr2	78.28		PFKFB4	NP_004558.1	chr3	48517683
AMEXTC_0340000187194_FAM120A	chr2	78.28		FAM120A	NP_055427.2	chr9	93451695
AMEXTC_0340000193073_rft1	chr2	78.28		RFT1	NP_443091.1	chr3	53088484
AMEXTC_0340000201535_CRBN	chr2	78.28		CRBN	NP_057386.2	chr3	3149632
AMEXTC_0340000261156_LOC110195620	chr2	78.28		SETMAR	NP_006506.3	chr3	4303303
AMEXTC_0340000048285_BICD2	chr2	80.408		BICD2	NP_056065.1	chr9	92711362
AMEXTC_0340000180230_ACTR8	chr2	80.408		ACTR8	NP_075050.3	chr3	53867065
AMEXTC_0340000253044_IL17RB	chr2	80.408		IL17RB	NP_061195.2	chr3	53846549
AMEXTC_0340000013813_ARHGEF3	chr2	82.514		ARHGEF3	NP_062455.1	chr3	56727417
AMEXTC_0340000053122_CCDC66	chr2	82.514		CCDC66	NP_001012524.4	chr3	56557155
AMEXTC_0340000221828_FAM208A	chr2	82.514		FAM208A	NP_001106207.1	chr3	56620131
AMEXTC_0340000226053_hypothetical	chr2	82.514		WNT5A	NP_003383.2	chr3	55465714
AMEXTC_0340000013144_MAGI1	chr2	84.642		MAGI1	NP_004733.2	chr3	65359268
AMEXTC_0340000026220_prickle2.S	chr2	84.642		PRICKLE2	NP_942559.1	chr3	64093849
AMEXTC_0340000047736_DENND6A	chr2	84.642		DENND6A	NP_689891.1	chr3	57625453
AMEXTC_0340000050721_PDE12	chr2	84.642		PDE12	NP_808881.3	chr3	57556246
AMEXTC_0340000189489_ADAMTS9	chr2	84.642		ADAMTS9	NP_891550.1	chr3	64515654
AMEXTC_0340000213170_arf4.S	chr2	84.642		ARF4	NP_001651.1	chr3	57571362
AMEXTC_0340000213170_arf4.S	chr2	84.642		ARF5	NP_001653.1	chr7	127588351
AMEXTC_0340000213610_SLMAP	chr2	84.642		SLMAP	NP_009090.2	chr3	57757255
AMEXTC_0340000012223_CADPS	chr2	86.77		CADPS	NP_003707.2	chr3	62398345
AMEXTC_0340000056500_LOC102450640	chr2	91.026		C3orf67	NP_940865.1	chr3	58742005
AMEXTC_0340000067213_FAM3D	chr2	91.026		FAM3C	NP_055703.1	chr7	121348850
AMEXTC_0340000067213_FAM3D	chr2	91.026		FAM3D	NP_620160.1	chr3	58633942
AMEXTC_0340000116433_KCTD6	chr2	91.026		KCTD6	NP_699162.3	chr3	58498364
AMEXTC_0340000200361_pdhb	chr2	91.026		PDHB	NP_000916.2	chr3	58427629
AMEXTC_0340000215979_ACOX2	chr2	91.026		ACOX2	NP_003491.1	chr3	58505135
AMEXTC_0340000006483_PXK	chr2	93.154		PXK	NP_060241.2	chr3	58332889
AMEXTC_0340000034560_FLNB	chr2	93.154		FLNB	NP_001448.2	chr3	58008399
AMEXTC_0340000228179_LRIG1	chr2	93.154		LRIG1	NP_056356.2	chr3	66378796
AMEXTC_0340000229483_ABHD6	chr2	93.154		ABHD6	NP_065727.4	chr3	58237501
AMEXTC_0340000250940_hypothetical	chr2	93.154		RPP14	NP_008973.1	chr3	58306244
AMEXTC_0340000046345_KBTBD8	chr2	95.282		KBTBD8	NP_115894.2	chr3	66998302
AMEXTC_0340000121599_LOC101950129	chr2	95.282		SLC16A7	NP_004722.2	chr12	59689336
AMEXTC_0340000021862_MITF	chr2	99.538		MITF	NP_000239.1	chr3	69936599
AMEXTC_0340000022420_FOXP1	chr2	99.538		FOXP1	NP_001231739.1	chr3	70954713
AMEXTC_0340000039845_LOC108714721	chr2	99.538		LMOD3	NP_938012.2	chr3	69108671
AMEXTC_0340000154988_TMF1	chr2	99.538		EOGT	NP_775925.1	chr3	68975211
AMEXTC_0340000237301_FRMD4B	chr2	99.538		FRMD4B	NP_055938.1	chr3	69168782
AMEXTC_0340000020454_ECM2	chr2	101.666		ECM2	NP_001384.1	chr9	92495311
AMEXTC_0340000064989_LOC103176720	chr2	101.666		CDK16	NP_148978.2	chrX	47218128
AMEXTC_0340000064989_LOC103176720	chr2	101.666		CDK17	NP_002586.2	chr12	96278260
AMEXTC_0340000165602_IPPK	chr2	101.666		IPPK	NP_073592.1	chr9	92613183
AMEXTC_0340000011941_OMD	chr2	103.794		OMD	NP_005005.1	chr9	92414244
AMEXTC_0340000029770_SLC6A11	chr2	103.794		SLC6A11	NP_055044.1	chr3	10816199
AMEXTC_0340000042107_SLC6A1	chr2	103.794		SLC6A1	NP_003033.3	chr3	10992733
AMEXTC_0340000042648_aspn.L	chr2	103.794		ASPN	NP_060150.4	chr9	92456206
AMEXTC_0340000163743_NOL8	chr2	103.794		NOL8	NP_060418.4	chr9	92297357
AMEXTC_0340000024267_EFCC1	chr2	108.144		EFCC1	NP_079044.2	chr3	129001628
AMEXTC_0340000045439_SYN2	chr2	108.144		SYN2	NP_598328.1	chr3	12004359
AMEXTC_0340000054827_acad9.S	chr2	108.144		ACAD9	NP_054768.2	chr3	128879489
AMEXTC_0340000116238_LOC102355690	chr2	108.144		GP9	NP_000165.1	chr3	129060766
AMEXTC_0340000155586_MKRN2	chr2	108.144		MKRN2	NP_054879.3	chr3	12557013
AMEXTC_0340000158936_LOC101936505	chr2	108.144		HDHD5	NP_149061.1	chr22	17137519
AMEXTC_0340000162712_RAB43	chr2	108.144		RAB43	NP_940892.1	chr3	129087568
AMEXTC_0340000199181_LOC102935366	chr2	108.144		KIAA1257	NP_001335449.1	chr3	128909865
AMEXTC_0340000224778_ISY1	chr2	108.144		ISY1	NP_065752.1	chr3	129127415
AMEXTC_0340000224778_ISY1	chr2	108.144		ISY1-RAB43	NP_001191819.1	chr3	129087568
AMEXTC_0340000120031_Fbln2	chr2	112.488		FBLN2	NP_001989.2	chr3	13549124
AMEXTC_0340000149640_DNAH1	chr2	112.488		DNAH1	NP_056327.4	chr3	52316318
AMEXTC_0340000169239_NUP210	chr2	112.488		NUP210	NP_079199.2	chr3	13316229
AMEXTC_0340000237954_twf2	chr2	112.488		TWF2	NP_009215.1	chr3	52228609
AMEXTC_0340000248302_dnah1	chr2	112.488		DNAH1	NP_056327.4	chr3	52316318
AMEXTC_0340000022152_SEMA3G	chr2	114.616		SEMA3G	NP_064548.1	chr3	52433034
AMEXTC_0340000024516_acy1	chr2	114.616		ABHD14A-ACY1	NP_001303260.1	chr3	51975025
AMEXTC_0340000024516_acy1	chr2	114.616		ACY1	NP_000657.1	chr3	51983283
AMEXTC_0340000208804_PARP3	chr2	116.744		PARP3	NP_005476.4	chr3	51942304
AMEXTC_0340000229577_NPRL2	chr2	116.744		NPRL2	NP_006536.3	chr3	50347487
AMEXTC_0340000241859_LOC110084490	chr2	116.744		ABHD14B	NP_116139.1	chr3	51968509
AMEXTC_0340000047057_CACNA2D2	chr2	123.42		CACNA2D2	NP_006021.2	chr3	50362612
AMEXTC_0340000159671_CISH	chr2	123.42		CISH	NP_659508.1	chr3	50606453
AMEXTC_0340000008876_DAG1	chr2	127.771		DAG1	NP_004384.4	chr3	49470131
AMEXTC_0340000151531_LOC102347931	chr2	127.771		ZNF84	NP_003419.3	chr12	133037285
AMEXTC_0340000002650_rod	chr2	129.899		GNAT1	NP_000163.2	chr3	50191609
AMEXTC_0340000007534_IP6K1	chr2	129.899		IP6K1	NP_695005.1	chr3	49724294
AMEXTC_0340000021066_acp7	chr2	129.899		ACP7	NP_001004318.2	chr19	39084304
AMEXTC_0340000028419_SLC38A3	chr2	129.899		SLC38A3	NP_006832.1	chr3	50205245
AMEXTC_0340000031578_BSN	chr2	129.899		BSN	NP_003449.2	chr3	49554488
AMEXTC_0340000044197_lgals4-a	chr2	129.899		LGALS4	NP_006140.1	chr19	38801670
AMEXTC_0340000048904_RINL	chr2	129.899		RIN3	NP_079108.3	chr14	92513780
AMEXTC_0340000054094_LSU	chr2	129.899		HNRNPL	NP_001524.2	chr19	38836387
AMEXTC_0340000056116_RASSF1	chr2	129.899		RASSF1	NP_733831.1	chr3	50329785
AMEXTC_0340000095141_toll-like	chr2	129.899		TLR7	NP_057646.1	chrX	12867082
AMEXTC_0340000132213_FANCD2OS	chr2	129.899		FANCD2OS	NP_775743.1	chr3	10081319
AMEXTC_0340000144496_RBM5	chr2	129.899		RBM5	NP_005769.1	chr3	50088907
AMEXTC_0340000162936_MST1R	chr2	129.899		MST1R	NP_002438.2	chr3	49887002
AMEXTC_0340000172710_plekhg2	chr2	129.899		PLEKHG2	NP_073746.2	chr19	39413109
AMEXTC_0340000175123_HYAL2	chr2	129.899		HYAL2	NP_003764.3	chr3	50317789
AMEXTC_0340000176096_PAK4	chr2	129.899		PAK4	NP_005875.1	chr19	39125779
AMEXTC_0340000176096_PAK4	chr2	129.899		PAK5	NP_065074.1	chr20	9537389
AMEXTC_0340000182024_RAD54L2	chr2	129.899		RAD54L2	NP_055921.2	chr3	51538682
AMEXTC_0340000188809_LOC109692687	chr2	129.899		RBM6	NP_005768.1	chr3	49940043
AMEXTC_0340000211531_MANF	chr2	129.899		MANF	NP_006001.4	chr3	51385236
AMEXTC_0340000223100_SARS2	chr2	129.899		SARS2	NP_060297.1	chr19	38915263
AMEXTC_0340000231764_SEMA3B	chr2	129.899		SEMA3B	NP_004627.1	chr3	50267557
AMEXTC_0340000237704_DCAF1	chr2	129.899		DCAF1	NP_055518.1	chr3	51395866
AMEXTC_0340000249362_LOC102352874	chr2	129.899		APEH	NP_001631.3	chr3	49674001
AMEXTC_0340000261197_actn4	chr2	129.899		ACTN4	NP_004915.2	chr19	38647615
AMEXTC_0340000054413_PAF1	chr2	132.027		PAF1	NP_061961.2	chr19	39385629
AMEXTC_0340000060856_med29.L	chr2	132.027		MED29	NP_060062.1	chr19	39391302
AMEXTC_0340000269268_LOC102350225	chr2	132.027		SOCS5	NP_054730.1	chr2	46698959
AMEXTC_0340000036572_LRFN1	chr2	134.155		LRFN1	NP_065913.1	chr19	39306816
AMEXTC_0340000010169_CLIP3	chr2	136.262		CLIP3	NP_056341.1	chr19	36014659
AMEXTC_0340000015575_ryanodine	chr2	136.262		RYR3	NP_001027.3	chr15	33310961
AMEXTC_0340000046113_LOC102346949	chr2	136.262		CDKL1	NP_004187.2	chr14	50329590
AMEXTC_0340000058281_LOC100127267.L	chr2	136.262		CAPN3	NP_775110.1	chr15	42359499
AMEXTC_0340000062670_LOC106557086	chr2	136.262		TMEM87B	NP_116213.1	chr2	112055222
AMEXTC_0340000139942_eif3k.S	chr2	136.262		EIF3K	NP_037366.1	chr19	38619073
AMEXTC_0340000156247_MGC83907	chr2	136.262		ARHGAP11A	NP_055598.1	chr15	32615475
AMEXTC_0340000199670_BICRA	chr2	136.262		BICRA	NP_056526.3	chr19	47608195
AMEXTC_0340000200758_LOC102936453	chr2	136.262		ZBED1	NP_004720.1	chrX	2486413
AMEXTC_0340000216588_kptn	chr2	136.262		KPTN	NP_008990.2	chr19	47475140
AMEXTC_0340000301920_SUPT5H	chr2	136.262		SUPT5H	NP_003160.2	chr19	39445647
AMEXTC_0340000002098_EHD2	chr2	145.378		EHD2	NP_055416.2	chr19	47713343
AMEXTC_0340000005185_LOC108801799	chr2	145.378		OLFM4	NP_006409.3	chr13	53028740
AMEXTC_0340000014632_LOC100498119	chr2	145.378		OLFM4	NP_006409.3	chr13	53028740
AMEXTC_0340000023441_SPRED3	chr2	145.378		SPRED2	NP_861449.2	chr2	65310850
AMEXTC_0340000045286_CRX	chr2	145.378		OTX2	NP_068374.1	chr14	56800706
AMEXTC_0340000049268_cyp2g1p	chr2	145.378		CYP2C18	NP_000763.1	chr10	94683493
AMEXTC_0340000130139_Hnrnpul1	chr2	145.378		HNRNPUL1	NP_008971.2	chr19	41264173
AMEXTC_0340000217881_bckdha	chr2	145.378		BCKDHA	NP_000700.1	chr19	41397788
AMEXTC_0340000000141_hypothetical	chr2	147.506		CYP2A13	NP_000757.2	chr19	41088450
AMEXTC_0340000169013_ITPKC	chr2	147.506		ITPKC	NP_079470.1	chr19	40717102
AMEXTC_0340000202595_rab4b	chr2	147.506		RAB4A	NP_004569.2	chr1	229271061
AMEXTC_0340000202595_rab4b	chr2	147.506		RAB4B	NP_057238.3	chr19	40778218
AMEXTC_0340000049867_NUMBL	chr2	149.634		NUMB	NP_003735.3	chr14	73275209
AMEXTC_0340000198004_MAP3K10	chr2	149.634		MAP3K10	NP_002437.2	chr19	40191743
AMEXTC_0340000017282_PRX	chr2	153.985		PRX	NP_870998.2	chr19	40393763
AMEXTC_0340000016188_LOC108698608	chr2	158.335		LTBP4	NP_003564.2	chr19	40593165
AMEXTC_0340000020409_shkbp1.L	chr2	158.335		SHKBP1	NP_612401.2	chr19	40576850
AMEXTC_0340000043986_SPTBN4	chr2	158.335		SPTBN4	NP_066022.2	chr19	40467218
AMEXTC_0340000027616_LOC108698602	chr2	160.463		HHIPL1	NP_115801.3	chr14	99645109
AMEXTC_0340000168191_kcnk6.L	chr2	160.463		KCNK1	NP_002236.1	chr1	233614003
AMEXTC_0340000168191_kcnk6.L	chr2	160.463		KCNK6	NP_004814.1	chr19	38319843
AMEXTC_0340000141824_SAE1	chr2	162.591		SAE1	NP_005491.1	chr19	47130822
AMEXTC_0340000145148_ZC3H4	chr2	162.591		ZC3H4	NP_055983.1	chr19	47064189
AMEXTC_0340000062632_LOC102564239	chr2	164.719		CCDC9	NP_056418.1	chr19	47256473
AMEXTC_0340000040625_PTGIR	chr2	166.847		PTGIR	NP_000951.1	chr19	46620467
AMEXTC_0340000051673_LOC109913156	chr2	166.847		DEGS1	NP_003667.1	chr1	224183207
AMEXTC_0340000204076_DACT3	chr2	166.847		DACT1	NP_057735.2	chr14	58638038
AMEXTC_0340000267540_PRKD2	chr2	166.847		PRKD2	NP_057541.2	chr19	46674315
AMEXTC_0340000294776_strn4	chr2	166.847		STRN4	NP_037535.2	chr19	46719510
AMEXTC_0340000009716_NCAM-180	chr2	168.986		NCAM1	NP_000606.3	chr11	112961246
AMEXTC_0340000020249_dopamine	chr2	168.986		DRD2	NP_057658.2	chr11	113409594
AMEXTC_0340000026861_TTC12	chr2	168.986		TTC12	NP_060338.3	chr11	113314528
AMEXTC_0340000162845_TTC12	chr2	168.986		TTC12	NP_060338.3	chr11	113314528
AMEXTC_0340000180886_WDR62	chr2	168.986		WDR62	NP_775907.4	chr19	36054880
AMEXTC_0340000131457_BHMG1	chr2	175.476		BHMG1	NP_001297053.1	chr19	45733250
AMEXTC_0340000165410_LOC102352047	chr2	175.476		TRAPPC6B	NP_001073005.1	chr14	39147810
AMEXTC_0340000169015_FAM46A	chr2	175.476		FAM46A	NP_060103.2	chr6	81745729
AMEXTC_0340000263244_PRDM9	chr2	177.604		ZNF484	NP_113674.1	chr9	92844195
AMEXTC_0340000293230_TBCB	chr2	177.604		TBCB	NP_001272.2	chr19	36114985
AMEXTC_0340000011066_CLPTM1	chr2	179.732		CLPTM1	NP_001285.1	chr19	44955223
AMEXTC_0340000000584_DMPK	chr2	181.86		DMPK	NP_004400.4	chr19	45769708
AMEXTC_0340000022316_LOC103368325	chr2	181.86		KLC3	NP_803136.2	chr19	45340739
AMEXTC_0340000120347_FOXA3	chr2	181.86		FOXA1	NP_004487.2	chr14	37589551
AMEXTC_0340000143473_SYMPK	chr2	181.86		SYMPK	NP_004810.2	chr19	45815441
AMEXTC_0340000143954_ercc2	chr2	181.86		ERCC2	NP_000391.1	chr19	45351390
AMEXTC_0340000192435_MARK4	chr2	181.86		MARK4	NP_113605.2	chr19	45251257
AMEXTC_0340000256787_LOC102938719	chr2	181.86		GEMIN7	NP_078983.1	chr19	45079271
AMEXTC_0340000004419_EML2	chr2	183.988		EML2	NP_036287.1	chr19	45609399
AMEXTC_0340000007636_lrfn4.L	chr2	183.988		LRFN4	NP_076941.2	chr11	66857404
AMEXTC_0340000012590_LOC109921646	chr2	183.988		SLC22A6	NP_004781.2	chr11	62976596
AMEXTC_0340000012590_LOC109921646	chr2	183.988		SLC22A8	NP_004245.2	chr11	62992823
AMEXTC_0340000033936_CTSF	chr2	183.988		CTSF	NP_003784.2	chr11	66563463
AMEXTC_0340000043346_GNGT1	chr2	183.988		GNGT1	NP_068774.1	chr7	93906507
AMEXTC_0340000053727_LOC101390241	chr2	183.988		ANTXR2	NP_477520.2	chr4	79901616
AMEXTC_0340000135314_RBM4B	chr2	183.988		RBM4	NP_002887.2	chr11	66638616
AMEXTC_0340000135314_RBM4B	chr2	183.988		RBM4B	NP_113680.1	chr11	66664993
AMEXTC_0340000180353_RECK	chr2	183.988		RECK	NP_066934.1	chr9	36036912
AMEXTC_0340000187575_EHD1	chr2	183.988		EHD1	NP_006786.2	chr11	64852726
AMEXTC_0340000202492_SCYL1	chr2	183.988		SCYL1	NP_065731.3	chr11	65525076
AMEXTC_0340000208106_RCE1	chr2	183.988		RCE1	NP_005124.1	chr11	66843411
AMEXTC_0340000217961_LOC102937000	chr2	183.988		ITPKB	NP_002212.3	chr1	226631689
AMEXTC_0340000223671_pc.2	chr2	183.988		PC	NP_000911.2	chr11	66848525
AMEXTC_0340000250442_LOC109936340	chr2	183.988		PROKR1	NP_620414.1	chr2	68643587
AMEXTC_0340000251208_sptbn2	chr2	183.988		SPTBN1	NP_003119.2	chr2	54456316
AMEXTC_0340000298955_ATG2A	chr2	183.988		ATG2A	NP_055919.2	chr11	64894531
AMEXTC_0340000026176_RELA	chr2	186.116		RELA	NP_068810.3	chr11	65653595
AMEXTC_0340000185707_LOC102933292	chr2	186.116		B3GNT2	NP_006568.2	chr2	62196126
AMEXTC_0340000220945_zdhhc24.L	chr2	186.116		ZDHHC24	NP_997223.1	chr11	66535620
AMEXTC_0340000301828_OVOL1	chr2	186.116		OVOL1	NP_004552.2	chr11	65787033
AMEXTC_0340000010391_KLC2	chr2	188.244		KLC2	NP_073733.1	chr11	66257702
AMEXTC_0340000022044_LOC109957217	chr2	188.244		AXL	NP_001690.2	chr19	41219198
AMEXTC_0340000049896_SIPA1	chr2	188.244		SIPA1	NP_006738.3	chr11	65638106
AMEXTC_0340000059940_LOC109922124	chr2	188.244		NFKBIE	NP_004547.2	chr6	44258165
AMEXTC_0340000063562_UGP2	chr2	188.244		UGP2	NP_006750.3	chr2	63841879
AMEXTC_0340000163447_NTPCR	chr2	188.244		NTPCR	NP_115700.1	chr1	232950530
AMEXTC_0340000214557_RAB1B	chr2	188.244		RAB1A	NP_004152.1	chr2	65086853
AMEXTC_0340000214557_RAB1B	chr2	188.244		RAB1B	NP_112243.1	chr11	66268584
AMEXTC_0340000235236_YIF1A	chr2	188.244		YIF1A	NP_065203.2	chr11	66284579
AMEXTC_0340000237277_NUDT22	chr2	188.244		NUDT22	NP_115720.1	chr11	64226273
AMEXTC_0340000000641_NPAS4	chr2	190.372		NPAS4	NP_849195.2	chr11	66421003
AMEXTC_0340000029733_GAL3ST3	chr2	190.372		GAL3ST3	NP_149025.1	chr11	66040764
AMEXTC_0340000036170_SLC29A2	chr2	190.372		SLC29A2	NP_001523.2	chr11	66362520
AMEXTC_0340000061293_RIN2	chr2	190.372		RIN1	NP_004283.2	chr11	66332070
AMEXTC_0340000063783_LOC714747	chr2	190.372		SF3B2	NP_006833.2	chr11	66052344
AMEXTC_0340000170455_BRMS1	chr2	190.372		BRMS1L	NP_115728.2	chr14	35826390
AMEXTC_0340000216027_CD248	chr2	190.372		CD248	NP_065137.1	chr11	66314486
AMEXTC_0340000015090_LOC100490266	chr2	192.5		SLC22A6	NP_004781.2	chr11	62976596
AMEXTC_0340000031576_NAALADL1	chr2	192.5		NAALADL1	NP_005459.2	chr11	65044822
AMEXTC_0340000036715_PELI3	chr2	192.5		PELI1	NP_065702.2	chr2	64092651
AMEXTC_0340000036715_PELI3	chr2	192.5		PELI2	NP_067078.1	chr14	56118374
AMEXTC_0340000056878_DPP3	chr2	192.5		DPP3	NP_005691.2	chr11	66480012
AMEXTC_0340000148266_ACTR2	chr2	192.5		ACTR2	NP_005713.1	chr2	65227694
AMEXTC_0340000164947_DNA2	chr2	192.5		DNA2	NP_001073918.2	chr10	68414063
AMEXTC_0340000224201_capn1	chr2	192.5		CAPN1	NP_005177.2	chr11	65181832
AMEXTC_0340000231026_VPS51	chr2	192.5		VPS51	NP_037397.2	chr11	65096114
AMEXTC_0340000247207_DPF2	chr2	192.5		DPF2	NP_006259.1	chr11	65333753
AMEXTC_0340000036517_CCDC85B	chr2	194.628		CCDC85A	NP_001073902.1	chr2	56184122
AMEXTC_0340000214463_c11orf95	chr2	194.628		C11orf95	NP_001138408.1	chr11	63759891
AMEXTC_0340000020153_MAP4K2	chr2	196.756		MAP4K2	NP_004570.2	chr11	64789100
AMEXTC_0340000048692_LTBP3	chr2	196.756		LTBP3	NP_066548.2	chr11	65538558
AMEXTC_0340000057937_SF1	chr2	196.756		SF1	NP_004621.2	chr11	64764603
AMEXTC_0340000230479_PYGM	chr2	196.756		PYGM	NP_005600.1	chr11	64746388
AMEXTC_0340000238282_LOC103282338	chr2	196.756		RASGRP2	NP_722541.1	chr11	64726910
AMEXTC_0340000005577_LOC101937511	chr2	203.233		PROX1	NP_002754.2	chr1	213988500
AMEXTC_0340000007721_NRXN2	chr2	203.233		NRXN2	NP_055895.1	chr11	64606173
AMEXTC_0340000018021_MACROD1	chr2	203.233		MACROD1	NP_054786.2	chr11	63998557
AMEXTC_0340000031444_FLRT1	chr2	203.233		FLRT1	NP_037412.2	chr11	64103889
AMEXTC_0340000045708_FERMT3	chr2	203.233		FERMT3	NP_113659.3	chr11	64206679
AMEXTC_0340000054404_Foxn2	chr2	203.233		FOXN2	NP_002149.2	chr2	48314655
AMEXTC_0340000054404_Foxn2	chr2	203.233		FOXN3	NP_005188.2	chr14	89156171
AMEXTC_0340000063717_PRDX5	chr2	203.233		PRDX5	NP_036226.1	chr11	64318087
AMEXTC_0340000065689_nuclear	chr2	203.233		ACTA1	NP_001091.1	chr1	229431245
AMEXTC_0340000065689_nuclear	chr2	203.233		ACTC1	NP_005150.1	chr15	34788095
AMEXTC_0340000156160_TRPT1	chr2	203.233		TRPT1	NP_001028850.2	chr11	64223798
AMEXTC_0340000167767_ESRRA	chr2	203.233		ESRRB	NP_004443.3	chr14	76371346
AMEXTC_0340000217855_RPS6KA5	chr2	203.233		RPS6KA4	NP_003933.1	chr11	64359152
AMEXTC_0340000237968_NAA40	chr2	203.233		NAA40	NP_079047.2	chr11	63938969
AMEXTC_0340000249724_LOC102352268	chr2	203.233		TGFB2	NP_003229.1	chr1	218345283
AMEXTC_0340000011149_NXF1	chr2	205.361		NXF1	NP_001074960.1	chr11	62792125
AMEXTC_0340000017090_LOC107292401	chr2	205.361		ADSSL1	NP_689541.1	chr14	104724196
AMEXTC_0340000212154_WDR74	chr2	205.361		WDR74	NP_060563.2	chr11	62832904
AMEXTC_0340000260771_BSCL2	chr2	205.361		BSCL2	NP_116056.3	chr11	62690261
AMEXTC_0340000000092_rom1	chr2	207.489		PRPH2	NP_000313.2	chr6	42696594
AMEXTC_0340000019109_EML3	chr2	207.489		EML3	NP_694997.2	chr11	62602218
AMEXTC_0340000042030_GANAB	chr2	207.489		GANAB	NP_938148.1	chr11	62624825
AMEXTC_0340000047647_iqsec2	chr2	207.489		IQSEC2	NP_001104595.1	chrX	53232875
AMEXTC_0340000122053_AHNAK	chr2	207.489		AHNAK	NP_001611.1	chr11	62515901
AMEXTC_0340000145363_wdr45	chr2	207.489		WDR45	NP_009006.2	chrX	49074432
AMEXTC_0340000198971_LOC110089195	chr2	207.489		TSPYL4	NP_067680.3	chr6	116249967
AMEXTC_0340000227262_hypothetical	chr2	207.489		TUT1	NP_073741.2	chr11	62575044
AMEXTC_0340000227835_AHNAK	chr2	207.489		AHNAK	NP_001611.1	chr11	62515901
AMEXTC_0340000239016_LOC102359903	chr2	207.489		CERK	NP_073603.2	chr22	46684409
AMEXTC_0340000240416_B3GAT3	chr2	207.489		B3GAT3	NP_036332.2	chr11	62615295
AMEXTC_0340000240538_PRICKLE3	chr2	207.489		PRICKLE3	NP_006141.2	chrX	49174802
AMEXTC_0340000027455_FGD1	chr2	209.617		FGD1	NP_004454.2	chrX	54445453
AMEXTC_0340000031266_WNK3	chr2	209.617		WNK3	NP_065973.2	chrX	54192822
AMEXTC_0340000042533_fam120c	chr2	209.617		FAM120C	NP_060318.4	chrX	54068402
AMEXTC_0340000063422_huwe1	chr2	209.617		HUWE1	NP_113584.3	chrX	53532095
AMEXTC_0340000233543_HUWE1	chr2	209.617		HUWE1	NP_113584.3	chrX	53532095
AMEXTC_0340000027275_ITIH6	chr2	211.745		ITIH6	NP_940912.1	chrX	54748898
AMEXTC_0340000031904_PFKFB1	chr2	211.745		PFKFB1	NP_002616.2	chrX	54933133
AMEXTC_0340000056847_trex2	chr2	211.745		TREX2	NP_542432.2	chrX	153444719
AMEXTC_0340000129028_deoxyribonuclease	chr2	211.745		DNASE1	NP_005214.2	chr16	3652938
AMEXTC_0340000136685_TREX2	chr2	211.745		TREX2	NP_542432.2	chrX	153444719
AMEXTC_0340000191685_alas2	chr2	211.745		ALAS2	NP_000023.2	chrX	55009054
AMEXTC_0340000217901_APEX2	chr2	211.745		APEX2	NP_055296.2	chrX	55000322
AMEXTC_0340000246011_pkm	chr2	211.745		PKM	NP_002645.3	chr15	72199028
AMEXTC_0340000058278_LOC108798378	chr2	213.873		ECM2	NP_001384.1	chr9	92495311
AMEXTC_0340000062036_BGN	chr2	213.873		BGN	NP_001702.1	chrX	153494888
AMEXTC_0340000157537_SLC6A8	chr2	216.842		SLC6A8	NP_005620.1	chrX	153688296
AMEXTC_0340000009592_Pdzd4	chr2	218.107		PDZD4	NP_115901.2	chrX	153802165
AMEXTC_0340000031638_l1cam	chr2	218.107		L1CAM	NP_000416.1	chrX	153861513
AMEXTC_0340000055683_idh3g	chr2	218.107		IDH3G	NP_004126.1	chrX	153785765
AMEXTC_0340000221058_hypothetical	chr2	218.107		SSR4	NP_006271.1	chrX	153794563
AMEXTC_0340000247999_plxnb3.S	chr2	218.107		PLXNB3	NP_005384.2	chrX	153764195
AMEXTC_0340000003132_flna	chr2	220.235		FLNA	NP_001447.2	chrX	154348531
AMEXTC_0340000020582_ARHGAP4	chr2	220.235		SRGAP1	NP_065813.1	chr12	63844752
AMEXTC_0340000053070_RPL10	chr2	220.235		RPL10	NP_006004.3	chrX	154398064
AMEXTC_0340000059846_RENBP	chr2	220.235		RENBP	NP_002901.2	chrX	153935268
AMEXTC_0340000166195_LOC108698082	chr2	220.235		PLXNA3	NP_059984.3	chrX	154458280
AMEXTC_0340000218622_TMEM187	chr2	220.235		TMEM187	NP_003483.1	chrX	153972539
AMEXTC_0340000233564_tafazzin	chr2	220.235		TAZ	NP_851828.1	chrX	154411517
AMEXTC_0340000266531_tktl2.L	chr2	220.235		TKTL2	NP_115512.3	chr4	163471094
AMEXTC_0340000001499_TNRC18	chr2	224.586		TNRC18	NP_001073964.2	chr7	5306791
AMEXTC_0340000001711_MMD2	chr2	224.586		MMD2	NP_940685.3	chr7	4905988
AMEXTC_0340000027336_TFE3	chr2	224.586		TFE3	NP_006512.2	chrX	49028725
AMEXTC_0340000057244_WIPI2	chr2	224.586		WIPI2	NP_057087.2	chr7	5190203
AMEXTC_0340000175177_UBA1	chr2	224.586		UBA1	NP_003325.2	chrX	47193801
AMEXTC_0340000182825_OTUD5	chr2	224.586		OTUD5	NP_060072.1	chrX	48922025
AMEXTC_0340000183489_PIM2	chr2	224.586		PIM3	NP_001001852.2	chr22	49960494
AMEXTC_0340000218637_CCDC120	chr2	224.586		CCDC120	NP_296375.1	chrX	49058965
AMEXTC_0340000222344_AP5Z1	chr2	224.586		AP5Z1	NP_055670.1	chr7	4775630
AMEXTC_0340000249078_RADIL	chr2	224.586		RADIL	NP_060529.4	chr7	4799108
AMEXTC_0340000269340_unnamed	chr2	224.586		RHOA	NP_001655.1	chr3	49359135
AMEXTC_0340000214667_FBXL18	chr2	226.714		FBXL18	NP_079239.3	chr7	5475796
AMEXTC_0340000055421_cytoplasmic	chr2	228.842		ACTB	NP_001092.1	chr7	5527145
AMEXTC_0340000055421_cytoplasmic	chr2	228.842		ACTG1	NP_001605.1	chr17	81509970
AMEXTC_0340000117228_LOC101391786	chr2	228.842		ACTB	NP_001092.1	chr7	5527145
AMEXTC_0340000117228_LOC101391786	chr2	228.842		ACTG1	NP_001605.1	chr17	81509970
AMEXTC_0340000195265_RNF216	chr2	228.842		RNF216	NP_996994.1	chr7	5620040
AMEXTC_0340000217064_FSCN1	chr2	228.842		FSCN1	NP_003079.1	chr7	5592804
AMEXTC_0340000023019_hypothetical	chr2	230.97		SHISA9	NP_001138676.2	chr16	12901619
AMEXTC_0340000027035_hypothetical	chr2	230.97		UGT1A1	NP_000454.1	chr2	233760272
AMEXTC_0340000027035_hypothetical	chr2	230.97		UGT1A4	NP_009051.1	chr2	233718791
AMEXTC_0340000027035_hypothetical	chr2	230.97		UGT1A6	NP_995584.1	chr2	233691674
AMEXTC_0340000027035_hypothetical	chr2	230.97		UGT1A9	NP_066307.1	chr2	233671897
AMEXTC_0340000145612_kpna7.S	chr2	230.97		KPNA2	NP_002257.1	chr17	68035601
AMEXTC_0340000204350_ARPC1B	chr2	230.97		ARPC1B	NP_005711.1	chr7	99374674
AMEXTC_0340000208113_hypothetical	chr2	230.97		ARPC1A	NP_006400.2	chr7	99325872
AMEXTC_0340000263234_CPPED1	chr2	230.97		CPPED1	NP_060810.2	chr16	12659798
AMEXTC_0340000000783_LOC109933425	chr2	237.448		CACNA1I	NP_066919.2	chr22	39570752
AMEXTC_0340000012394_LMTK2	chr2	237.448		LMTK2	NP_055731.2	chr7	98106884
AMEXTC_0340000017394_EEF2K	chr2	237.448		EEF2K	NP_037434.1	chr16	22206270
AMEXTC_0340000065945_Aimp2	chr2	237.448		AIMP2	NP_006294.2	chr7	6009250
AMEXTC_0340000138491_arl6ip1	chr2	237.448		ARL6IP1	NP_055976.1	chr16	18791666
AMEXTC_0340000143270_OTOA	chr2	237.448		OTOA	NP_653273.3	chr16	21678513
AMEXTC_0340000181689_CDR2	chr2	237.448		CDR2	NP_001793.1	chr16	22345935
AMEXTC_0340000182656_USP42	chr2	237.448		USP42	NP_115548.1	chr7	6104918
AMEXTC_0340000187175_VWA3A	chr2	237.448		VWA3A	NP_775886.3	chr16	22092537
AMEXTC_0340000241494_gspt1	chr2	237.448		GSPT1	NP_002085.2	chr16	11868127
AMEXTC_0340000241494_gspt1	chr2	237.448		GSPT2	NP_060564.2	chrX	51743384
AMEXTC_0340000249786_POLR3E	chr2	237.448		POLR3E	NP_060589.1	chr16	22297374
AMEXTC_0340000290162_KDELR2	chr2	237.448		KDELR2	NP_006845.1	chr7	6461080
AMEXTC_0340000004844_ALKBH5	chr2	239.576		ALKBH5	NP_060228.3	chr17	18183552
AMEXTC_0340000011470_LLGL1	chr2	239.576		LLGL1	NP_004131.3	chr17	18225621
AMEXTC_0340000036908_TOM1L2	chr2	239.576		TOM1L2	NP_001028723.1	chr17	17843507
AMEXTC_0340000053318_gid4	chr2	239.576		GID4	NP_076957.3	chr17	18039296
AMEXTC_0340000159498_DACT1	chr2	239.576		DACT1	NP_057735.2	chr14	58638038
AMEXTC_0340000182949_TOP3A	chr2	239.576		TOP3A	NP_004609.1	chr17	18271428
AMEXTC_0340000188938_EPN2	chr2	239.576		EPN2	NP_683723.2	chr17	19237376
AMEXTC_0340000271047_FLII	chr2	239.576		FLII	NP_002009.1	chr17	18244816
AMEXTC_0340000293218_SHMT1	chr2	239.576		SHMT1	NP_004160.3	chr17	18327859
AMEXTC_0340000160329_RASD1	chr2	241.704		RASD1	NP_057168.1	chr17	17494438
AMEXTC_0340000025500_MPRIP	chr2	243.832		MPRIP	NP_055949.2	chr17	17042759
AMEXTC_0340000157279_FLCN	chr2	243.832		FLCN	NP_659434.2	chr17	17212212
AMEXTC_0340000176580_COPS3	chr2	243.832		COPS3	NP_003644.2	chr17	17246623
AMEXTC_0340000238363_Pld6	chr2	243.832		PLD6	NP_849158.2	chr17	17200994
AMEXTC_0340000191003_DHRS7B	chr2	259.344		DHRS7B	NP_056325.2	chr17	21126927
AMEXTC_0340000040829_kcnj12	chr2	262.206		KCNJ12	NP_066292.2	chr17	21376386
AMEXTC_0340000147104_SETD2	chr2	295.041		SETD2	NP_054878.5	chr3	47016407
AMEXTC_0340000165924_ngfr	chr2	295.041		NGFR	NP_002498.1	chr17	49495292
AMEXTC_0340000018037_LOC108719793	chr2	323.964		CSPG5	NP_001193872.1	chr3	47562237
AMEXTC_0340000039567_MYO1G	chr2	323.964		MYO1D	NP_056009.1	chr17	32492521
AMEXTC_0340000137795_aurkb.L	chr2	323.964		AURKB	NP_004208.2	chr17	8204730
AMEXTC_0340000154534_LOC101950183	chr2	323.964		ZNF567	NP_689816.2	chr19	36687611
AMEXTC_0340000154534_LOC101950183	chr2	323.964		ZNF585A	NP_689868.1	chr19	37147437
AMEXTC_0340000154534_LOC101950183	chr2	323.964		ZNF585B	NP_689492.3	chr19	37181578
AMEXTC_0340000157004_NBEAL2	chr2	323.964		NBEAL2	NP_055990.1	chr3	46979682
AMEXTC_0340000157948_ELP6	chr2	323.964		ELP6	NP_001026873.2	chr3	47495639
AMEXTC_0340000181488_Dhx30	chr2	323.964		DHX30	NP_055781.2	chr3	47802908
AMEXTC_0340000190671_SCAP	chr2	323.964		SCAP	NP_036367.2	chr3	47413684
AMEXTC_0340000196628_LOC101936582	chr2	323.964		ZNF586	NP_060122.2	chr19	57769651
AMEXTC_0340000209916_NACAD	chr2	323.964		NACAD	NP_001139806.1	chr7	45080436
AMEXTC_0340000214416_LOC101601417	chr2	323.964		ZNF182	NP_008893.1	chrX	47974850
AMEXTC_0340000214416_LOC101601417	chr2	323.964		ZNF658	NP_149350.3	chr9	66900724
AMEXTC_0340000247133_HSPA9	chr2	323.964		HSPA9	NP_004125.3	chr5	138554881
AMEXTC_0340000015070_RBFOX1	chr2	328.22		RBFOX1	NP_665900.1	chr16	7332749
AMEXTC_0340000024275_LOC101872464	chr2	328.22		SLC4A2	NP_003031.3	chr7	151059569
AMEXTC_0340000025319_E3	chr2	328.22		MGRN1	NP_001135763.2	chr16	4624823
AMEXTC_0340000026147_PPL	chr2	328.22		PPL	NP_002696.3	chr16	4882506
AMEXTC_0340000030742_LOC101870270	chr2	328.22		LRIG3	NP_700356.2	chr12	58872154
AMEXTC_0340000036094_cdk5	chr2	328.22		CDK5	NP_004926.1	chr7	151053811
AMEXTC_0340000039226_sept12	chr2	328.22		2018-09-09	NP_006631.2	chr17	77319514
AMEXTC_0340000045937_LOC110159626	chr2	328.22		ASIC1	NP_001086.2	chr12	50057636
AMEXTC_0340000045937_LOC110159626	chr2	328.22		ASIC2	NP_001085.2	chr17	33013087
AMEXTC_0340000046289_RHBDL1	chr2	328.22		RHBDL1	NP_001265649.1	chr16	675665
AMEXTC_0340000053864_LOC104684927	chr2	328.22		STXBP4	NP_848604.3	chr17	54968764
AMEXTC_0340000057361_PDIA2	chr2	328.22		PDIA2	NP_006840.2	chr16	283136
AMEXTC_0340000063320_LOC108792455	chr2	328.22		ZFP37	NP_003399.1	chr9	113041814
AMEXTC_0340000063320_LOC108792455	chr2	328.22		ZKSCAN1	NP_003430.1	chr7	100015551
AMEXTC_0340000063320_LOC108792455	chr2	328.22		ZKSCAN8	NP_006289.2	chr6	28141909
AMEXTC_0340000063320_LOC108792455	chr2	328.22		ZNF180	NP_037388.3	chr19	44474427
AMEXTC_0340000063320_LOC108792455	chr2	328.22		ZNF180	NP_037388.3	chr19	44474427
AMEXTC_0340000063320_LOC108792455	chr2	328.22		ZNF189	NP_003443.2	chr9	101398853
AMEXTC_0340000063320_LOC108792455	chr2	328.22		ZNF329	NP_078896.3	chr19	58126327
AMEXTC_0340000063320_LOC108792455	chr2	328.22		ZNF397	NP_001128650.1	chr18	35241029
AMEXTC_0340000063320_LOC108792455	chr2	328.22		ZNF436	NP_085137.1	chr1	23359447
AMEXTC_0340000063320_LOC108792455	chr2	328.22		ZNF484	NP_113674.1	chr9	92844195
AMEXTC_0340000063320_LOC108792455	chr2	328.22		ZNF568	NP_940941.2	chr19	36916328
AMEXTC_0340000063320_LOC108792455	chr2	328.22		ZNF569	NP_689697.2	chr19	37411157
AMEXTC_0340000063320_LOC108792455	chr2	328.22		ZNF569	NP_689697.2	chr19	37411157
AMEXTC_0340000069295_minor	chr2	328.22		HBA1	NP_000549.1	chr16	176650
AMEXTC_0340000069295_minor	chr2	328.22		HBA2	NP_000508.1	chr16	172846
AMEXTC_0340000070102_beta	chr2	328.22		HBD	NP_000510.1	chr11	5232828
AMEXTC_0340000162248_AXIN1	chr2	328.22		AXIN1	NP_003493.1	chr16	287439
AMEXTC_0340000165772_DNAJA3	chr2	328.22		DNAJA3	NP_005138.3	chr16	4425804
AMEXTC_0340000174299_CREBBP	chr2	328.22		CREBBP	NP_004371.2	chr16	3725054
AMEXTC_0340000184702_eci1	chr2	328.22		ECI1	NP_001910.2	chr16	2239871
AMEXTC_0340000241639_iqca1	chr2	328.22		IQCA1	NP_079002.3	chr2	236324146
AMEXTC_0340000006233_LOC102574404	chr2	330.348		CORO7	NP_078811.3	chr16	4354541
AMEXTC_0340000006233_LOC102574404	chr2	330.348		CORO7-PAM16	NP_001188408.1	chr16	4340250
AMEXTC_0340000012092_SRL	chr2	330.348		SRL	NP_001092284.1	chr16	4189373
AMEXTC_0340000017158_SLX4	chr2	330.348		SLX4	NP_115820.2	chr16	3581182
AMEXTC_0340000020006_GLIS2	chr2	330.348		GLIS2	NP_115964.2	chr16	4332223
AMEXTC_0340000026924_VASN	chr2	330.348		VASN	NP_612449.2	chr16	4371847
AMEXTC_0340000027487_LOC101950270	chr2	330.348		GCGR	NP_000151.1	chr17	81804131
AMEXTC_0340000175500_TFAP4	chr2	330.348		TFAP4	NP_003214.1	chr16	4257185
AMEXTC_0340000224424_TRAP1	chr2	330.348		TRAP1	NP_057376.2	chr16	3658036
AMEXTC_0340000017383_ABCA3	chr2	332.476		ABCA3	NP_001080.2	chr16	2275877
AMEXTC_0340000021317_RAB11FIP3	chr2	332.476		RAB11FIP3	NP_055515.1	chr16	425667
AMEXTC_0340000132638_NME4	chr2	332.476		NME4	NP_005000.1	chr16	397191
AMEXTC_0340000154687_HMOX2	chr2	332.476		HMOX2	NP_002125.3	chr16	4476339
AMEXTC_0340000182814_CAPN15	chr2	332.476		CAPN15	NP_005623.1	chr16	527855
AMEXTC_0340000227726_ASB8	chr2	332.476		ASB8	NP_077000.1	chr12	48147787
AMEXTC_0340000232634_DECR2	chr2	332.476		DECR2	NP_065715.1	chr16	401857
AMEXTC_0340000260777_TEDC2	chr2	332.476		TEDC2	NP_079384.2	chr16	2460113
AMEXTC_0340000009162_LOC110086928	chr2	336.732		NOG	NP_005441.1	chr17	56593698
AMEXTC_0340000021869_LOC101933514	chr2	336.732		NTN1	NP_004813.2	chr17	9021541
AMEXTC_0340000003146_LOC105481505	chr2	343.408		RNPS1	NP_006702.1	chr16	2253115
AMEXTC_0340000224140_tbc1d24.1.L	chr2	343.408		TBC1D24	NP_065756.1	chr16	2475145
AMEXTC_0340000267508_ATP6V0C	chr2	343.408		ATP6V0C	NP_001685.1	chr16	2513869
AMEXTC_0340000301506_TELO2	chr2	343.408		TELO2	NP_057195.2	chr16	1493350
AMEXTC_0340000017659_FBXL16	chr2	344.599		FBXL16	NP_699181.2	chr16	692499
AMEXTC_0340000019350_mapk8ip3	chr2	344.599		MAPK8IP3	NP_055948.2	chr16	1706182
AMEXTC_0340000026338_GCC2	chr2	344.599		GCC2	NP_852118.1	chr2	108449120
AMEXTC_0340000061280_IGFALS	chr2	344.599		IGFALS	NP_004961.1	chr16	1790412
AMEXTC_0340000234539_CCDC78	chr2	344.599		CCDC78	NP_001026907.2	chr16	722581
AMEXTC_0340000166534_LOC101931165	chr2	345.514		NOMO1	NP_055102.3	chr16	14833785
AMEXTC_0340000166534_LOC101931165	chr2	345.514		NOMO2	NP_775885.1	chr16	16232594
AMEXTC_0340000166534_LOC101931165	chr2	345.514		NOMO3	NP_001004067.1	chr16	16232531
AMEXTC_0340000002238_LOC104048564	chr2	356.758		OBSCN	NP_443075.3	chr1	228208129
AMEXTC_0340000009927_pth1r	chr2	356.758		PTH1R	NP_000307.1	chr3	46877745
AMEXTC_0340000012227_LOC104044042	chr2	356.758		PTH1R	NP_000307.1	chr3	46877745
AMEXTC_0340000054701_LOC102349279	chr2	356.758		CYB5R4	NP_057314.2	chr6	83859650
AMEXTC_0340000146643_IBA57	chr2	356.758		IBA57	NP_001010867.1	chr1	228165807
AMEXTC_0340000008306_PDXDC1	chr2	377.596		PDXDC1	NP_055842.2	chr16	14974962
AMEXTC_0340000016267_LOC101950450	chr2	377.596		C16orf45	NP_149978.1	chr16	15434467
AMEXTC_0340000018591_NDE1	chr2	377.596		NDE1	NP_060138.1	chr16	15650225
AMEXTC_0340000031126_TMC5	chr2	377.596		TMC5	NP_079056.2	chr16	19456449
AMEXTC_0340000062817_NTAN1	chr2	377.596		NTAN1	NP_775745.1	chr16	15037852
AMEXTC_0340000165495_GDE1	chr2	377.596		GDE1	NP_057725.1	chr16	19501692
AMEXTC_0340000204086_MARF1	chr2	377.596		MARF1	NP_055462.2	chr16	15594368
AMEXTC_0340000220768_MYH11	chr2	377.596		MYH11	NP_002465.1	chr16	15703134
AMEXTC_0340000225100_COQ7	chr2	377.596		COQ7	NP_057222.2	chr16	19067594
AMEXTC_0340000243253_LOC108798328	chr2	377.596		ABCC1	NP_004987.2	chr16	15949576
AMEXTC_0340000271284_FOPNL	chr2	377.596		FOPNL	NP_653201.1	chr16	15865718
AMEXTC_0340000035467_gprc5b	chr2	380.502		GPRC5B	NP_057319.1	chr16	19858970
AMEXTC_0340000009879_ZFAND2A	chr2	386.34		ZFAND2B	NP_620157.1	chr2	219206783
AMEXTC_0340000052548_GET4	chr2	386.34		GET4	NP_057033.2	chr7	876553
AMEXTC_0340000077300_tsr3	chr2	386.34		TSR3	NP_001001410.1	chr16	1349239
AMEXTC_0340000118255_pdilt	chr2	386.34		PDILT	NP_777584.1	chr16	20359169
AMEXTC_0340000237159_acsm3	chr2	386.34		ACSM3	NP_005613.2	chr16	20763989
AMEXTC_0340000000247_FAM20C	chr2	388.468		FAM20C	NP_064608.2	chr7	192968
AMEXTC_0340000009586_PRKAR1B	chr2	388.468		PRKAR1B	NP_002726.1	chr7	549196
AMEXTC_0340000021228_LOC108701673	chr2	388.468		MSLN	NP_005814.2	chr16	760764
AMEXTC_0340000030088_SSTR5	chr2	388.468		SSTR2	NP_001041.1	chr17	73165020
AMEXTC_0340000030088_SSTR5	chr2	388.468		SSTR5	NP_001044.1	chr16	1078780
AMEXTC_0340000038207_TEKT4	chr2	388.468		TEKT4	NP_653306.1	chr2	94871432
AMEXTC_0340000088056_LOC105749768	chr2	388.468		TRRAP	NP_003487.1	chr7	98878489
AMEXTC_0340000187160_LMF1	chr2	388.468		LMF1	NP_001338949.1	chr16	853635
AMEXTC_0340000201934_chtf18	chr2	388.468		CHTF18	NP_071375.1	chr16	788621
AMEXTC_0340000218693_RPUSD1	chr2	388.468		RPUSD1	NP_478072.1	chr16	784973
AMEXTC_0340000145592_hagh.L	chr2	401.621		HAGH	NP_005317.2	chr16	1809102
AMEXTC_0340000231082_NARFL	chr2	401.621		NARFL	NP_071938.1	chr16	729754
AMEXTC_0340000003602_SYNGR3	chr2	408.298		SYNGR3	NP_004200.2	chr16	1989944
AMEXTC_0340000042516_rab26	chr2	408.298		RAB26	NP_055168.2	chr16	2148649
AMEXTC_0340000058951_LOC100489456	chr2	408.298		ASTL	NP_001002036.3	chr2	96123849
AMEXTC_0340000135282_rps2	chr2	408.298		RPS2	NP_002943.2	chr16	1962060
AMEXTC_0340000163117_TSC2	chr2	408.298		TSC2	NP_001107854.1	chr16	2047894
AMEXTC_0340000249387_TBL3	chr2	408.298		TBL3	NP_006444.2	chr16	1972062
AMEXTC_0340000040327_CASKIN1	chr2	410.426		CASKIN1	NP_065815.1	chr16	2177182
AMEXTC_0340000044897_GRID2IP	chr2	410.426		GRID2IP	NP_001138590.1	chr7	6496777
AMEXTC_0340000156347_ZDHHC4	chr2	410.426		ZDHHC4	NP_060576.1	chr7	6577433
AMEXTC_0340000165438_lcmt1	chr2	410.426		LCMT1	NP_057393.2	chr16	25111725
AMEXTC_0340000205782_E4F1	chr2	410.426		E4F1	NP_004415.3	chr16	2223487
AMEXTC_0340000249051_LOC101932119	chr2	410.426		HEXDC	NP_001317471.1	chr17	82418353
AMEXTC_0340000036543_CACNG3	chr2	412.554		CACNG3	NP_006530.1	chr16	24255552
AMEXTC_0340000056424_OLFM2	chr2	412.554		OLFM2	NP_001291276.1	chr19	9853717
AMEXTC_0340000157997_TNRC6A	chr2	412.554		TNRC6A	NP_055309.2	chr16	24729670
AMEXTC_0340000130171_UBFD1	chr2	416.905		UBFD1	NP_061989.2	chr16	23557540
AMEXTC_0340000002600_GGA2	chr2	419.033		GGA2	NP_055859.1	chr16	23463541
AMEXTC_0340000057951_COG7	chr2	419.033		COG7	NP_705831.1	chr16	23388492
AMEXTC_0340000037961_hs3st2	chr2	421.138		HS3ST2	NP_006034.1	chr16	22814538
AMEXTC_0340000003201_cfp	chr2	427.522		CFP	NP_002612.1	chrX	47624212
AMEXTC_0340000022148_SYN1	chr2	427.522		SYN1	NP_008881.2	chrX	47571900
AMEXTC_0340000042079_CFP	chr2	427.522		CFP	NP_002612.1	chrX	47624212
AMEXTC_0340000172172_LOC102365177	chr2	427.522		LRRN1	NP_065924.3	chr3	3799430
AMEXTC_0340000190494_cdk16	chr2	427.522		CDK17	NP_002586.2	chr12	96278260
AMEXTC_0340000204201_araf.L	chr2	427.522		ARAF	NP_001645.1	chrX	47561099
AMEXTC_0340000209538_LOC102352461	chr2	427.522		EMC3	NP_060917.1	chr3	9962679
AMEXTC_0340000238509_usp11	chr2	427.522		USP11	NP_004642.2	chrX	47232914
AMEXTC_0340000004384_LOC108788268	chr2	429.628		FAM19A1	NP_998774.2	chr3	68004215
AMEXTC_0340000022287_AGR2	chr2	429.628		AGR2	NP_006399.1	chr7	16792639
AMEXTC_0340000057724_CXXC1	chr2	429.628		CXXC1	NP_055408.2	chr18	50282342
AMEXTC_0340000152537_TIMM17B	chr2	429.628		TIMM17B	NP_005825.1	chrX	48893446
AMEXTC_0340000179879_hdac6	chr2	429.628		HDAC10	NP_114408.3	chr22	50245183
AMEXTC_0340000179879_hdac6	chr2	429.628		HDAC6	NP_006035.2	chrX	48802015
AMEXTC_0340000001978_LOC107112842	chr2	431.756		GRM7	NP_000835.1	chr3	6861114
AMEXTC_0340000010627_LOC100563653	chr2	431.756		CAMKV	NP_076951.2	chr3	49857980
AMEXTC_0340000045173_PQBP1	chr2	431.756		PQBP1	NP_001161461.1	chrX	48897911
AMEXTC_0340000245240_abt1.L	chr2	431.756		ABT1	NP_037507.1	chr6	26596942
AMEXTC_0340000000952_MON1B	chr2	436.106		MON1A	NP_115731.2	chr3	49908868
AMEXTC_0340000016243_PORCN	chr2	436.106		PORCN	NP_073736.2	chrX	48508958
AMEXTC_0340000024262_wdr13	chr2	436.106		WDR13	NP_060353.2	chrX	48597477
AMEXTC_0340000036997_FTSJ1	chr2	436.106		FTSJ1	NP_036412.1	chrX	48476020
AMEXTC_0340000037808_PTPN18	chr2	436.106		PTPN18	NP_055184.2	chr2	130356006
AMEXTC_0340000041038_RBM10	chr2	436.106		RBM10	NP_005667.2	chrX	47145217
AMEXTC_0340000043349_ORF2	chr2	436.106		CYP3A4	NP_059488.2	chr7	99756959
AMEXTC_0340000043349_ORF2	chr2	436.106		CYP3A5	NP_000768.1	chr7	99648188
AMEXTC_0340000058397_myosin	chr2	436.106		MYH1	NP_005954.3	chr17	10492309
AMEXTC_0340000058962_CCDC115	chr2	436.106		CCDC115	NP_115733.2	chr2	130337932
AMEXTC_0340000084801_LOC104124785	chr2	436.106		MYH1	NP_005954.3	chr17	10492309
AMEXTC_0340000084801_LOC104124785	chr2	436.106		MYH2	NP_060004.3	chr17	10521147
AMEXTC_0340000126408_SLC38A5	chr2	436.106		SLC38A3	NP_006832.1	chr3	50205245
AMEXTC_0340000154678_LOC101945909	chr2	436.106		CYP3A4	NP_059488.2	chr7	99756959
AMEXTC_0340000154678_LOC101945909	chr2	436.106		CYP3A7	NP_000756.3	chr7	99705036
AMEXTC_0340000154678_LOC101945909	chr2	436.106		CYP3A7-CYP3A51P	NP_001243426.2	chr7	99684678
AMEXTC_0340000193611_myosin	chr2	436.106		MYH13	NP_003793.2	chr17	10300865
AMEXTC_0340000225294_Tubulin	chr2	436.106		TUBA3C	NP_005992.1	chr13	19173769
AMEXTC_0340000225294_Tubulin	chr2	436.106		TUBA3D	NP_525125.2	chr2	131476006
AMEXTC_0340000228077_SDK1	chr2	436.106		SDK1	NP_689957.3	chr7	3301447
AMEXTC_0340000242522_LOC101945909	chr2	436.106		CYP3A5	NP_000768.1	chr7	99648188
AMEXTC_0340000043607_TTYH3	chr2	438.234		TTYH3	NP_079526.1	chr7	2631968
AMEXTC_0340000207671_IQCE	chr2	438.234		IQCE	NP_689771.3	chr7	2558971
AMEXTC_0340000190538_SNX8	chr2	439.383		SNX8	NP_037453.1	chr7	2251769
AMEXTC_0340000008939_VILL	chr2	440.34		AVIL	NP_006567.3	chr12	57797375
AMEXTC_0340000011044_MGC85331	chr2	440.34		CRYM	NP_001879.1	chr16	21258517
AMEXTC_0340000017040_SELENON	chr2	440.34		SELENON	NP_996809.1	chr1	25800175
AMEXTC_0340000021292_LOC109306583	chr2	440.34		MAP3K2	NP_006600.3	chr2	127298668
AMEXTC_0340000022574_CRYGN	chr2	440.34		CRYGN	NP_653328.1	chr7	151428831
AMEXTC_0340000032779_UNCX	chr2	440.34		UNCX	NP_001073930.1	chr7	1232381
AMEXTC_0340000040279_ADCYAP1R1	chr2	440.34		ADCYAP1R1	NP_001109.2	chr7	31052460
AMEXTC_0340000051766_nub1	chr2	440.34		NUB1	NP_057202.3	chr7	151341760
AMEXTC_0340000057470_INTS1	chr2	440.34		INTS1	NP_001073922.2	chr7	1470276
AMEXTC_0340000164737_MAD1L1	chr2	440.34		MAD1L1	NP_003541.2	chr7	1815791
AMEXTC_0340000165042_dnah3	chr2	440.34		DNAH3	NP_060009.1	chr16	20933110
AMEXTC_0340000186949_LOC107131814	chr2	440.34		DNAH3	NP_060009.1	chr16	20933110
AMEXTC_0340000193560_DNAH3	chr2	440.34		DNAH3	NP_060009.1	chr16	20933110
AMEXTC_0340000219228_micall2	chr2	440.34		MICALL2	NP_891554.1	chr7	1434358
AMEXTC_0340000239110_DNAH3	chr2	440.34		DNAH3	NP_060009.1	chr16	20933110
AMEXTC_0340000277567_C20H16orf52	chr2	440.34		C16orf52	NP_001158051.1	chr16	22008134
AMEXTC_0340000284728_LOC107591252	chr2	440.34		GARS	NP_002038.2	chr7	30594892
AMEXTC_0340000293229_LOC101935204	chr2	440.34		UQCRC2	NP_003357.2	chr16	21953063
AMEXTC_0340000030012_ACVR2B	chr2	442.468		ACVR2B	NP_001097.2	chr3	38454298
AMEXTC_0340000053672_scn5a	chr2	442.468		SCN1A	NP_008851.3	chr2	165989159
AMEXTC_0340000053672_scn5a	chr2	442.468		SCN2A	NP_066287.2	chr2	165293830
AMEXTC_0340000053672_scn5a	chr2	442.468		SCN5A	NP_000326.2	chr3	38548061
AMEXTC_0340000153468_GORASP1	chr2	442.468		GORASP1	NP_114105.1	chr3	39096598
AMEXTC_0340000174270_TTC21A	chr2	442.468		TTC21A	NP_001098983.2	chr3	39107660
AMEXTC_0340000201206_CSRNP1	chr2	442.468		CSRNP1	NP_149016.2	chr3	39141850
AMEXTC_0340000237732_WDR48	chr2	442.468		WDR48	NP_065890.1	chr3	39051985
AMEXTC_0340000229303_GAPDH	chr2	444.596		GAPDH	NP_002037.2	chr12	6534516
AMEXTC_0340000019005_LOC108788787	chr2	448.946		CYP8B1	NP_004382.2	chr3	42872191
AMEXTC_0340000019015_XIRP1	chr2	448.946		XIRP2	NP_689594.4	chr2	166888486
AMEXTC_0340000216245_cry-dash.L	chr2	448.946		CRY1	NP_004066.1	chr12	106991364
AMEXTC_0340000001089_PRKAG2	chr2	451.074		PRKAG2	NP_057287.2	chr7	151556114
AMEXTC_0340000012695_CIITA	chr2	451.074		CIITA	NP_000237.2	chr16	10877197
AMEXTC_0340000157420_ZBTB47	chr2	451.074		ZBTB47	NP_660149.2	chr3	42653683
AMEXTC_0340000173320_BFAR	chr2	451.074		BFAR	NP_057645.1	chr16	14632810
AMEXTC_0340000220972_RHEB	chr2	451.074		RHEB	NP_005605.1	chr7	151466011
AMEXTC_0340000036282_GRIN2A	chr2	455.418		GRIN2A	NP_000824.1	chr16	9753404
AMEXTC_0340000189546_Epithelial	chr2	455.418		EMP2	NP_001415.1	chr16	10528421
AMEXTC_0340000017422_LOC104483667	chr2	462.094		KMT2C	NP_733751.2	chr7	152134924
AMEXTC_0340000023330_NKTR	chr2	462.094		NKTR	NP_005376.2	chr3	42600654
AMEXTC_0340000060286_Kmt2c	chr2	462.094		KMT2C	NP_733751.2	chr7	152134924
AMEXTC_0340000064821_GALNT11	chr2	462.094		GALNT11	NP_071370.2	chr7	152025673
AMEXTC_0340000065690_LSU	chr2	462.094		HBZ	NP_005323.1	chr16	152854
AMEXTC_0340000083011_usp7	chr2	462.094		USP7	NP_003461.2	chr16	8892093
AMEXTC_0340000227209_c16orf72	chr2	462.094		C16orf72	NP_054836.2	chr16	9091679
AMEXTC_0340000039252_UBE3C	chr2	466.35		UBE3C	NP_055486.2	chr7	157138960
AMEXTC_0340000187931_cnpy1.L	chr2	466.35		CNPY2	NP_055070.1	chr12	56309841
AMEXTC_0340000251661_nom1.L	chr2	466.35		NOM1	NP_612409.1	chr7	156949722
AMEXTC_0340000263310_LMBR1	chr2	466.35		LMBR1	NP_071903.2	chr7	156680875
AMEXTC_0340000020884_DIP2C	chr2	468.478		DIP2C	NP_055789.1	chr10	274189
AMEXTC_0340000029300_ESYT2	chr2	468.478		ESYT2	NP_065779.1	chr7	158730997
AMEXTC_0340000058206_GTPBP4	chr2	468.478		GTPBP4	NP_036473.2	chr10	988408
AMEXTC_0340000159621_ncapg2	chr2	468.478		NCAPG2	NP_060230.5	chr7	158631168
AMEXTC_0340000204521_VIPR2	chr2	468.478		VIPR2	NP_003373.2	chr7	159028174
AMEXTC_0340000218047_WDR60	chr2	468.478		WDR60	NP_060521.4	chr7	158856577
AMEXTC_0340000057276_PFKP	chr2	472.829		PFKP	NP_002618.1	chr10	3067519
AMEXTC_0340000191638_KLF6	chr2	472.829		KLF6	NP_001291.3	chr10	3775995
AMEXTC_0340000212163_LOC101472402	chr2	472.829		PFKP	NP_002618.1	chr10	3067519
AMEXTC_0340000011097_FZD8	chr2	474.957		FZD5	NP_003459.2	chr2	207762585
AMEXTC_0340000014404_NRP1	chr2	474.957		NRP1	NP_003864.4	chr10	33177490
AMEXTC_0340000248146_PARD3	chr2	474.957		PARD3	NP_062565.2	chr10	34109559
AMEXTC_0340000029858_JCAD	chr2	477.085		JCAD	NP_065899.1	chr10	30012799
AMEXTC_0340000057412_MAP3K8	chr2	477.085		MAP3K8	NP_005195.2	chr10	30434020
AMEXTC_0340000060000_LOC107584371	chr2	477.085		SVIL	NP_003165.2	chr10	29457347
AMEXTC_0340000214696_MTPAP	chr2	477.085		MTPAP	NP_060579.3	chr10	30309800
AMEXTC_0340000218689_ZNF438	chr2	477.085		ZNF438	NP_877432.1	chr10	30844635
AMEXTC_0340000016330_MKX	chr2	479.213		MKX	NP_775847.2	chr10	27672873
AMEXTC_0340000020316_armc4	chr2	479.213		ARMC4	NP_060546.2	chr10	27812163
AMEXTC_0340000187921_abi1	chr2	479.213		ABI1	NP_001171596.1	chr10	26746595
AMEXTC_0340000198368_PDSS1	chr2	479.213		PDSS1	NP_055132.2	chr10	26697423
AMEXTC_0340000230487_MPP7	chr2	479.213		MPP7	NP_775767.2	chr10	28050993
AMEXTC_0340000269280_BAMBI	chr2	479.213		BAMBI	NP_036474.1	chr10	28677494
AMEXTC_0340000136848_CALU	chr2	483.484		CALU	NP_001210.1	chr7	128739291
AMEXTC_0340000165108_zgc:77650	chr2	483.484		ARF4	NP_001651.1	chr3	57571362
AMEXTC_0340000196622_DENND6B	chr2	483.484		DENND6B	NP_001001794.3	chr22	50311962
AMEXTC_0340000241592_PPP6R2	chr2	483.484		PPP6R2	NP_001229827.1	chr22	50343316
AMEXTC_0340000006572_ARHGAP21	chr2	490.316		ARHGAP21	NP_065875.3	chr10	24583608
AMEXTC_0340000030810_KIAA1217	chr2	490.316		KIAA1217	NP_062536.2	chr10	24208790
AMEXTC_0340000137806_OTUD1	chr2	490.316		OTUD1	NP_001138845.1	chr10	23439268
AMEXTC_0340000183319_prtfdc1.L	chr2	490.316		PRTFDC1	NP_064585.1	chr10	24848606
AMEXTC_0340000183708_LOC104689224	chr2	490.316		BMI1	NP_005171.4	chr10	22321209
AMEXTC_0340000183708_LOC104689224	chr2	490.316		COMMD3-BMI1	NP_001190991.1	chr10	22316382
AMEXTC_0340000207688_PTF1A	chr2	490.316		PTF1A	NP_835455.1	chr10	23192530
AMEXTC_0340000250619_ENKUR	chr2	490.316		ENKUR	NP_659447.1	chr10	24981978
AMEXTC_0340000054698_DFNA5	chr2	491.656		GSDME	NP_004394.1	chr7	24698354
AMEXTC_0340000014406_HOXA7	chr2	492.423		HOXA7	NP_008827.2	chr7	27153718
AMEXTC_0340000017616_HoxA13	chr2	492.423		HOXA13	NP_000513.2	chr7	27196879
AMEXTC_0340000021890_HOXA4	chr2	492.423		HOXC4	NP_055435.2	chr12	54016851
AMEXTC_0340000031158_HoxA9	chr2	492.423		HOXA9	NP_689952.1	chr7	27162437
AMEXTC_0340000060719_HOXA3	chr2	492.423		HOXA3	NP_109377.1	chr7	27106189
AMEXTC_0340000060719_HOXA3	chr2	492.423		HOXB3	NP_002137.4	chr17	48548869
AMEXTC_0340000070499_HoxA11	chr2	492.423		HOXA11	NP_005514.1	chr7	27181156
AMEXTC_0340000070500_HOXA10	chr2	492.423		HOXA10	NP_061824.3	chr7	27170590
AMEXTC_0340000146652_cbx3.S	chr2	492.423		CBX3	NP_009207.2	chr7	26201210
HOXA6	chr2	492.423		HOXA6	NP_076919.1	chr7	27145582
AMEXTC_0340000138369_TAX1BP1	chr2	496.773		TAX1BP1	NP_001073333.1	chr7	27740094
AMEXTC_0340000049255_JAZF1	chr2	498.901		JAZF1	NP_778231.2	chr7	27830573
AMEXTC_0340000166091_CREB5	chr2	498.901		CREB5	NP_004895.2	chr7	28435614
AMEXTC_0340000017583_RAPGEF5	chr2	505.578		RAPGEF5	NP_036426.3	chr7	22118289
AMEXTC_0340000019699_dnah11	chr2	505.578		DNAH11	NP_001264044.1	chr7	21543214
AMEXTC_0340000020334_DNAH11	chr2	505.578		DNAH17	NP_775899.3	chr17	78423696
AMEXTC_0340000014822_TRAK1	chr2	512.254		TRAK1	NP_001036111.1	chr3	42091253
AMEXTC_0340000032253_epidermal	chr2	512.254		EGFR	NP_005219.2	chr7	55019020
AMEXTC_0340000036051_MYRIP	chr2	512.254		MYRIP	NP_001271353.1	chr3	39809659
AMEXTC_0340000102609_LOC104357900	chr2	512.254		TRAK1	NP_001036111.1	chr3	42091253
AMEXTC_0340000192347_CTNNB1	chr2	512.254		CTNNB1	NP_001895.1	chr3	41199450
AMEXTC_0340000218656_KIAA1143	chr2	512.254		KIAA1143	NP_065747.1	chr3	44748743
AMEXTC_0340000055952_TPK1	chr2	516.605		TPK1	NP_071890.2	chr7	144451940
AMEXTC_0340000042282_ZDHHC3	chr2	518.733		ZDHHC3	NP_001128651.1	chr3	44915260
AMEXTC_0340000055937_gpnmb	chr2	518.733		GPNMB	NP_002501.1	chr7	23246696
AMEXTC_0340000189869_LOC104386417	chr2	518.733		CNTNAP2	NP_054860.1	chr7	146116360
AMEXTC_0340000228986_EXOSC7	chr2	518.733		EXOSC7	NP_055819.2	chr3	44976248
AMEXTC_0340000032192_hyccin	chr2	519.626		FAM126A	NP_115970.2	chr7	22941258
AMEXTC_0340000045021_HACD1	chr2	520.839		HACD1	NP_055056.3	chr10	17589958
AMEXTC_0340000133889_STAM	chr2	520.839		STAM	NP_003464.1	chr10	17644124
AMEXTC_0340000030169_CUBN	chr2	522.967		CUBN	NP_001072.2	chr10	16823965
AMEXTC_0340000217433_TRDMT1	chr2	522.967		TRDMT1	NP_004403.1	chr10	17137335
AMEXTC_0340000149772_GTPBP10	chr2	525.095		GTPBP10	NP_149098.2	chr7	90346664
AMEXTC_0340000023623_ITGA8	chr2	529.445		ITGA8	NP_003629.2	chr10	15513948
AMEXTC_0340000054001_FAM171A1	chr2	529.445		FAM171A1	NP_001010924.1	chr10	15211644
AMEXTC_0340000146450_MINDY3	chr2	533.796		MINDY3	NP_079224.1	chr10	15778168
AMEXTC_0340000058285_STEAP4	chr2	535.903		STEAP4	NP_078912.2	chr7	88276428
AMEXTC_0340000242212_CDK14	chr2	535.903		CDK14	NP_036527.1	chr7	90709397
AMEXTC_0340000194136_AKAP9	chr2	540.231		AKAP9	NP_005742.4	chr7	91940874
AMEXTC_0340000207903_mterf1	chr2	540.231		MTERF1	NP_008911.1	chr7	91872875
AMEXTC_0340000012627_ITGB8	chr2	540.252		ITGB8	NP_002205.1	chr7	20331101
AMEXTC_0340000012795_tfpi2	chr2	540.252		TFPI2	NP_006519.1	chr7	93885396
AMEXTC_0340000035531_efcab1	chr2	540.252		RBM48	NP_115496.2	chr7	92528772
AMEXTC_0340000183323_ANKIB1	chr2	540.252		ANKIB1	NP_061877.1	chr7	92246233
AMEXTC_0340000194189_PEX1	chr2	540.252		PEX1	NP_000457.1	chr7	92487022
AMEXTC_0340000204892_LOC108799558	chr2	540.252		ABCB4	NP_000434.1	chr7	87402044
AMEXTC_0340000212993_HEPACAM2	chr2	540.252		HEPACAM2	NP_937794.1	chr7	93188540
AMEXTC_0340000222745_VPS50	chr2	540.252		VPS50	NP_060137.2	chr7	93232339
AMEXTC_0340000027663_PPP1R9A	chr2	542.38		PPP1R9A	NP_060120.2	chr7	94907636
AMEXTC_0340000044826_SNX13	chr2	542.38		SNX13	NP_055947.1	chr7	17790760
AMEXTC_0340000053074_PDK4	chr2	542.38		PDK4	NP_002603.1	chr7	95583496
AMEXTC_0340000058967_LOC108498692	chr2	542.38		PON2	NP_000296.2	chr7	95404861
AMEXTC_0340000210163_SNX13	chr2	542.38		SNX13	NP_055947.1	chr7	17790760
AMEXTC_0340000216620_FERD3L	chr2	542.38		FERD3L	NP_690862.1	chr7	19144781
AMEXTC_0340000230272_TNKS2	chr2	544.508		TNKS2	NP_079511.1	chr10	91798393
AMEXTC_0340000002373_SLC39A12	chr2	546.636		SLC39A12	NP_001138667.1	chr10	17951838
AMEXTC_0340000011741_CACNB2	chr2	546.636		CACNB2	NP_963864.1	chr10	18400583
AMEXTC_0340000023242_collagen	chr2	546.636		COL1A1	NP_000079.2	chr17	50184095
AMEXTC_0340000013970_ETV1	chr2	549.881		ETV1	NP_001156619.1	chr7	13891230
AMEXTC_0340000008768_sostdc1	chr2	550.869		SOSTDC1	NP_056279.1	chr7	16461480
AMEXTC_0340000015593_LOC108718485	chr2	550.869		DGKB	NP_663733.1	chr7	14175980
AMEXTC_0340000021315_MEOX2	chr2	550.869		MEOX2	NP_005915.2	chr7	15611211
AMEXTC_0340000036377_SYF2	chr2	550.869		SYF2	NP_056299.1	chr1	25222275
AMEXTC_0340000039115_VWDE	chr2	550.869		VWDE	NP_001129396.1	chr7	12330884
AMEXTC_0340000057533_ARL4A	chr2	550.869		ARL4A	NP_005729.1	chr7	12687285
AMEXTC_0340000230868_TMEM106B	chr2	550.869		TMEM106B	NP_060844.2	chr7	12211221
AMEXTC_0340000007288_THSD7A	chr2	552.997		THSD7A	NP_056019.1	chr7	11370434
AMEXTC_0340000020161_phf14.L	chr2	552.997		PHF14	NP_055475.2	chr7	10973871
AMEXTC_0340000019670_NHSL2	chr2	555.125		NHSL2	NP_001013649.2	chrX	71911087
AMEXTC_0340000027333_ERCC6L	chr2	555.125		ERCC6	NP_000115.1	chr10	49454479
AMEXTC_0340000060912_DBF4B	chr2	555.125		RPS4X	NP_000998.1	chrX	72272602
AMEXTC_0340000161358_PHKA1	chr2	555.125		PHKA1	NP_002628.2	chrX	72578813
AMEXTC_0340000169988_SHROOM4	chr2	555.125		SHROOM4	NP_065768.2	chrX	50591644
AMEXTC_0340000173879_ERCC6L	chr2	555.125		ERCC6L	NP_060139.2	chrX	72204654
AMEXTC_0340000033741_LOC102356032	chr2	557.253		TTC30A	NP_689488.3	chr2	177614297
AMEXTC_0340000033741_LOC102356032	chr2	557.253		TTC30B	NP_689730.2	chr2	177550152
AMEXTC_0340000038009_DGKK	chr2	557.253		DGKH	NP_690874.2	chr13	42048707
AMEXTC_0340000043253_KLF8	chr2	557.253		KLF8	NP_009181.2	chrX	56232355
AMEXTC_0340000246382_UBA5	chr2	557.253		UBA5	NP_079094.1	chr3	132659496
AMEXTC_0340000130060_TOPBP1	chr2	559.381		TOPBP1	NP_008958.2	chr3	133600604
AMEXTC_0340000212179_DNAJC13	chr2	559.381		DNAJC13	NP_056083.3	chr3	132417708
AMEXTC_0340000052374_LOC101953593	chr2	572.646		COL6A6	NP_001096078.1	chr3	130560333
AMEXTC_0340000155877_CMSS1	chr2	572.646		CMSS1	NP_115735.2	chr3	99817833
AMEXTC_0340000159625_ASTE1	chr2	572.646		ASTE1	NP_054784.2	chr3	131013872
AMEXTC_0340000173379_ATP2C1	chr2	572.646		ATP2C1	NP_055197.2	chr3	130894447
AMEXTC_0340000227002_PIK3R4	chr2	572.646		PIK3R4	NP_055417.1	chr3	130678933
AMEXTC_0340000271061_mrpl3	chr2	572.646		MRPL3	NP_009139.1	chr3	131462200
AMEXTC_0340000005238_LOC100486063	chr2	574.774		COL6A6	NP_001096078.1	chr3	130560333
AMEXTC_0340000009509_capn7	chr2	580.788		CAPN7	NP_055111.1	chr3	15206225
AMEXTC_0340000190435_NOD1	chr2	580.788		NOD1	NP_006083.1	chr7	30424526
AMEXTC_0340000142713_ngly1	chr2	583.529		NGLY1	NP_060767.2	chr3	25718943
AMEXTC_0340000155185_SLC4A7	chr2	583.529		SLC4A7	NP_001245308.1	chr3	27372720
AMEXTC_0340000191516_OXSM	chr2	583.529		OXSM	NP_060367.1	chr3	25790071
AMEXTC_0340000218664_CpEomesodermin	chr2	583.529		EOMES	NP_001265111.1	chr3	27715948
AMEXTC_0340000031036_RBMS3	chr2	586.678		RBMS3	NP_055298.2	chr3	29281311
AMEXTC_0340000059941_ABHD5	chr2	596.461		ABHD4	NP_071343.2	chr14	22598237
AMEXTC_0340000213596_gpd1l	chr2	596.461		GPD1L	NP_055956.1	chr3	32106510
AMEXTC_0340000230707_TRIM71	chr2	596.461		TRIM71	NP_001034200.1	chr3	32818017
AMEXTC_0340000181714_ube2e1	chr2	596.461		UBE2E1	NP_003332.1	chr3	23805892
AMEXTC_0340000030118_SNRK	chr2	598.589		SNRK	NP_060189.3	chr3	43286511
AMEXTC_0340000035824_LOC108719958	chr2	598.589		TOP2B	NP_001059.2	chr3	25597904
AMEXTC_0340000040189_ZNF385D	chr2	598.589		ZNF385D	NP_078973.1	chr3	21420997
AMEXTC_0340000233242_LOC104267732	chr2	598.589		KAT2B	NP_003875.3	chr3	20040031
AMEXTC_0340000233697_thyroid	chr2	598.589		THRB	NP_000452.2	chr3	24117153
AMEXTC_0340000007244_TBC1D5	chr2	605.068		TBC1D5	NP_055559.1	chr3	17157161
AMEXTC_0340000038139_PLCL2	chr2	605.068		PLCL2	NP_055999.2	chr3	16933089
AMEXTC_0340000048341_WIPF3	chr2	605.068		WIPF3	NP_001073998.2	chr7	29806553
AMEXTC_0340000139918_LOC103768321	chr2	607.196		CHN2	NP_001279998.1	chr7	29146546
AMEXTC_0340000032727_GLOD5	chr2	609.324		GLOD5	NP_001073958.2	chrX	48761749
AMEXTC_0340000044922_LOC105402702	chr2	616		EDNRB	NP_000106.1	chr13	77895480
AMEXTC_0340000187482_NSDHL	chr2	616		NSDHL	NP_057006.1	chrX	152830966
AMEXTC_0340000051764_TMLHE	chr2	618.128		TMLHE	NP_060666.1	chrX	155489010
AMEXTC_0340000242011_FAAH2	chr2	618.128		FAAH2	NP_777572.2	chrX	57286676
AMEXTC_0340000041579_Fam13b	chr2	624.601		FAM13B	NP_057687.2	chr5	137937915
AMEXTC_0340000054357_LOC107120690	chr2	624.601		ZNF658	NP_149350.3	chr9	66900724
AMEXTC_0340000071824_CES4A	chr2	624.601		CES1	NP_001257.4	chr16	55802851
AMEXTC_0340000183070_LOC104371319	chr2	624.601		ZNF629	NP_001073886.1	chr16	30778454
AMEXTC_0340000052814_ARHGEF5	chr3	0		ARHGEF5	NP_005426.2	chr7	144355395
AMEXTC_0340000055983_TRPV6	chr3	2.128		TRPV6	NP_061116.5	chr7	142871202
AMEXTC_0340000057905_KEL	chr3	2.128		ECE2	NP_001032401.1	chr3	184276010
AMEXTC_0340000057905_KEL	chr3	2.128		EEF1AKMT4-ECE2	NP_055508.3	chr3	184249656
AMEXTC_0340000065162_TRPV6	chr3	2.128		TRPV6	NP_061116.5	chr7	142871202
AMEXTC_0340000119188_prodh.L	chr3	2.128		PRODH	NP_057419.4	chr22	18912773
AMEXTC_0340000120294_LOC102565486	chr3	2.128		A2M	NP_000005.2	chr12	9067707
AMEXTC_0340000123297_PRSS2	chr3	2.128		PRSS1	NP_002760.1	chr7	142749467
AMEXTC_0340000123297_PRSS2	chr3	2.128		PRSS3	NP_002762.2	chr9	33795560
AMEXTC_0340000125318_EPHA1	chr3	2.128		EPHA1	NP_005223.4	chr7	143391111
AMEXTC_0340000156325_LOC101932790	chr3	2.128		HKR1	NP_861451.1	chr19	37334623
AMEXTC_0340000156325_LOC101932790	chr3	2.128		ZFP28	NP_065879.1	chr19	56538947
AMEXTC_0340000156325_LOC101932790	chr3	2.128		ZNF157	NP_003437.2	chrX	47370599
AMEXTC_0340000156325_LOC101932790	chr3	2.128		ZNF22	NP_008894.2	chr10	45000824
AMEXTC_0340000156325_LOC101932790	chr3	2.128		ZNF250	NP_066405.1	chr8	144876950
AMEXTC_0340000156325_LOC101932790	chr3	2.128		ZNF268	NP_003406.1	chr12	133181408
AMEXTC_0340000156325_LOC101932790	chr3	2.128		ZNF268	NP_003406.1	chr12	133181408
AMEXTC_0340000156325_LOC101932790	chr3	2.128		ZNF282	NP_003566.1	chr7	149195461
AMEXTC_0340000156325_LOC101932790	chr3	2.128		ZNF3	NP_116313.3	chr7	100069970
AMEXTC_0340000156325_LOC101932790	chr3	2.128		ZNF382	NP_116214.2	chr19	36605304
AMEXTC_0340000156325_LOC101932790	chr3	2.128		ZNF471	NP_065864.2	chr19	56507842
AMEXTC_0340000156325_LOC101932790	chr3	2.128		ZNF544	NP_055295.2	chr19	58228680
AMEXTC_0340000156325_LOC101932790	chr3	2.128		ZNF567	NP_689816.2	chr19	36687611
AMEXTC_0340000156325_LOC101932790	chr3	2.128		ZNF614	NP_079316.2	chr19	52013323
AMEXTC_0340000156325_LOC101932790	chr3	2.128		ZNF629	NP_001073886.1	chr16	30778454
AMEXTC_0340000156325_LOC101932790	chr3	2.128		ZNF79	NP_009066.2	chr9	127424373
AMEXTC_0340000163616_LOC102447214	chr3	2.128		TRPV6	NP_061116.5	chr7	142871202
AMEXTC_0340000165955_ZNF25	chr3	2.128		ZNF25	NP_659448.1	chr10	37949571
AMEXTC_0340000182249_PRSS2	chr3	2.128		PRSS1	NP_002760.1	chr7	142749467
AMEXTC_0340000182249_PRSS2	chr3	2.128		PRSS3	NP_002762.2	chr9	33795560
AMEXTC_0340000191235_ZNF572	chr3	2.128		ZNF33A	NP_008885.1	chr10	38010649
AMEXTC_0340000191235_ZNF572	chr3	2.128		ZNF33B	NP_008886.1	chr10	42589083
AMEXTC_0340000219722_PRDM9	chr3	2.128		ZKSCAN8	NP_006289.2	chr6	28141909
AMEXTC_0340000219722_PRDM9	chr3	2.128		ZNF300	NP_443092.1	chr5	150894391
AMEXTC_0340000219722_PRDM9	chr3	2.128		ZNF300	NP_443092.1	chr5	150894391
AMEXTC_0340000219722_PRDM9	chr3	2.128		ZNF544	NP_055295.2	chr19	58228680
AMEXTC_0340000219722_PRDM9	chr3	2.128		ZSCAN2	NP_870992.2	chr15	84601017
AMEXTC_0340000020125_LOC103801559	chr3	19.539		MOXD1	NP_056344.2	chr6	132296054
AMEXTC_0340000032575_LOC102507482	chr3	19.539		ZNF84	NP_003419.3	chr12	133037285
AMEXTC_0340000034470_LOC102815335	chr3	21.667		ZKSCAN7	NP_061121.2	chr3	44555174
AMEXTC_0340000034470_LOC102815335	chr3	21.667		ZNF629	NP_001073886.1	chr16	30778454
AMEXTC_0340000250188_LOC110214108	chr3	21.667		ZKSCAN8	NP_006289.2	chr6	28141909
AMEXTC_0340000250188_LOC110214108	chr3	21.667		ZNF776	NP_775903.3	chr19	57746795
AMEXTC_0340000060287_LOC105097340	chr3	28.342		MOXD1	NP_056344.2	chr6	132296054
AMEXTC_0340000165834_LOC101949135	chr3	28.342		GIMAP7	NP_694968.1	chr7	150514856
AMEXTC_0340000123212_LOC102568417	chr3	30.47		CLEC2B	NP_005118.2	chr12	9852368
AMEXTC_0340000195630_PHC1	chr3	34.705		PHC1	NP_004417.2	chr12	8914719
AMEXTC_0340000016316_LOC108697341	chr3	39.054		TPRG1L	NP_877429.2	chr1	3624991
AMEXTC_0340000017154_RIMKLB	chr3	39.054		RIMKLB	NP_065785.2	chr12	8697899
AMEXTC_0340000030349_CLSTN3	chr3	39.054		CLSTN3	NP_055533.2	chr12	7130370
AMEXTC_0340000034804_P3H3	chr3	39.054		P3H2	NP_001127890.1	chr3	189956727
AMEXTC_0340000056891_PRDM9	chr3	39.054		ZNF300	NP_443092.1	chr5	150894391
AMEXTC_0340000057429_USP5	chr3	39.054		USP5	NP_003472.2	chr12	6852126
AMEXTC_0340000124809_PTPN6	chr3	39.054		PTPN6	NP_002822.2	chr12	6951270
AMEXTC_0340000136694_triose	chr3	39.054		TPI1	NP_000356.1	chr12	6867528
AMEXTC_0340000183887_CEP250	chr3	39.054		CEP250	NP_009117.2	chr20	35455401
AMEXTC_0340000185412_foxj2-b	chr3	39.054		FOXJ3	NP_001185781.1	chr1	42176538
AMEXTC_0340000185452_phb2	chr3	39.054		PHB2	NP_001138303.1	chr12	6965351
AMEXTC_0340000153013_MGC78849	chr3	41.182		ZNF384	NP_001129206.1	chr12	6666476
AMEXTC_0340000175596_MLF2	chr3	41.182		MLF2	NP_005430.1	chr12	6747991
AMEXTC_0340000232616_ENO2	chr3	41.182		ENO2	NP_001966.1	chr12	6914449
AMEXTC_0340000010736_gata5.S	chr3	44.253		GATA5	NP_536721.1	chr20	62463496
AMEXTC_0340000020495_LAMA5	chr3	44.253		LAMA5	NP_005551.3	chr20	62309059
AMEXTC_0340000022262_LOC108702649	chr3	44.253		NTSR1	NP_002522.2	chr20	62708836
AMEXTC_0340000023722_map6	chr3	44.253		MAP6	NP_149052.1	chr11	75586917
AMEXTC_0340000029205_OSBPL2	chr3	44.253		OSBPL2	NP_653081.1	chr20	62238484
AMEXTC_0340000035167_st7	chr3	44.253		OGFR	NP_031372.2	chr20	62804799
AMEXTC_0340000043465_LOC108790326	chr3	44.253		TRHR	NP_003292.1	chr8	109087423
AMEXTC_0340000045598_IFFO1	chr3	44.253		IFFO1	NP_001317253.1	chr12	6539527
AMEXTC_0340000048099_CDH4	chr3	44.253		CDH2	NP_001783.2	chr18	27950962
AMEXTC_0340000062072_RPS3	chr3	44.253		RPS3	NP_000996.2	chr11	75399490
AMEXTC_0340000139638_MRGBP	chr3	44.253		MRGBP	NP_060740.1	chr20	62796404
AMEXTC_0340000154747_SLC17A9	chr3	44.253		SLC17A9	NP_071365.3	chr20	62952646
AMEXTC_0340000157891_SS18L1	chr3	44.253		SS18L1	NP_945173.1	chr20	62143719
AMEXTC_0340000163238_NOP2	chr3	44.253		NOP2	NP_006161.2	chr12	6556869
AMEXTC_0340000187198_ncapd2	chr3	44.253		NCAPD2	NP_055680.3	chr12	6494131
AMEXTC_0340000200750_ZC3H18	chr3	44.253		ZC3H18	NP_653205.3	chr16	88570380
AMEXTC_0340000203619_UVRAG	chr3	44.253		UVRAG	NP_003360.2	chr11	75815166
AMEXTC_0340000234591_GDPD5	chr3	44.253		GDPD5	NP_110419.5	chr11	75434639
AMEXTC_0340000240676_CHD4	chr3	44.253		CHD4	NP_001264.2	chr12	6570081
AMEXTC_0340000246047_TCFL5	chr3	44.253		TCFL5	NP_006593.2	chr20	62841013
AMEXTC_0340000250709_SUN3	chr3	44.253		SUN2	NP_056189.1	chr22	38734713
AMEXTC_0340000250709_SUN3	chr3	44.253		SUN3	NP_689995.3	chr7	47987148
AMEXTC_0340000149752_mrpl43.L	chr3	48.774		MRPL43	NP_115488.2	chr10	100986269
AMEXTC_0340000142742_birc7	chr3	54.426		BIRC2	NP_001157.1	chr11	102347181
AMEXTC_0340000209922_YTHDF1	chr3	54.426		YTHDF1	NP_060268.2	chr20	63195429
AMEXTC_0340000011473_KCNQ2	chr3	61.102		KCNQ2	NP_742106.1	chr20	63400213
AMEXTC_0340000020961_MYT1	chr3	61.102		MYT1	NP_004526.1	chr20	64164473
AMEXTC_0340000026064_CHRNA4	chr3	61.102		CHRNA4	NP_001243502.1	chr20	63343309
AMEXTC_0340000030471_LOC100075357	chr3	61.102		PXDN	NP_036425.1	chr2	1631886
AMEXTC_0340000046901_col20a1	chr3	61.102		COL20A1	NP_065933.2	chr20	63293185
AMEXTC_0340000223645_PCMTD2	chr3	61.102		PCMTD2	NP_060727.2	chr20	64255694
AMEXTC_0340000011058_SLC2A4RG	chr3	65.453		ZNF704	NP_001028895.1	chr8	80628450
AMEXTC_0340000024657_UCKL1	chr3	65.453		UCKL1	NP_060329.2	chr20	63939828
AMEXTC_0340000125786_SOX18	chr3	65.453		SOX18	NP_060889.1	chr20	64047725
AMEXTC_0340000214802_ARFRP1	chr3	65.453		ARFRP1	NP_003215.1	chr20	63698641
AMEXTC_0340000236635_TNFRSF6B	chr3	65.453		TNFRSF6B	NP_003814.1	chr20	63696650
AMEXTC_0340000269341_TCEA2	chr3	65.453		TCEA2	NP_003186.1	chr20	64063127
AMEXTC_0340000000005_ANGPT4	chr3	67.581		ANGPT1	NP_001137.2	chr8	107249481
AMEXTC_0340000000005_ANGPT4	chr3	67.581		ANGPT2	NP_001138.1	chr8	6499650
AMEXTC_0340000009534_clg18h20orf96	chr3	67.581		C20orf96	NP_542138.1	chr20	270862
AMEXTC_0340000028695_GMEB2	chr3	67.581		GMEB2	NP_036516.1	chr20	63587593
AMEXTC_0340000032828_SCRT2	chr3	67.581		SCRT2	NP_149120.1	chr20	661595
AMEXTC_0340000057551_TCF15	chr3	67.581		TCF15	NP_004600.2	chr20	603992
AMEXTC_0340000060585_TRIB3	chr3	67.581		TRIB2	NP_067675.1	chr2	12716871
AMEXTC_0340000157910_LOC107108375	chr3	67.581		MFSD2A	NP_116182.2	chr1	39955111
AMEXTC_0340000164139_SNPH	chr3	67.581		SNPH	NP_055538.2	chr20	1266290
AMEXTC_0340000190758_FNDC11	chr3	67.581		FNDC11	NP_076964.1	chr20	63553019
AMEXTC_0340000203360_HELZ2	chr3	67.581		HELZ2	NP_208384.3	chr20	63558085
AMEXTC_0340000239954_flna	chr3	67.581		FLNA	NP_001447.2	chrX	154348531
AMEXTC_0340000256975_hm13.S	chr3	67.581		HM13	NP_848695.1	chr20	31514409
AMEXTC_0340000264745_LOC101361888	chr3	67.581		STK35	NP_543026.2	chr20	2101881
AMEXTC_0340000281123_MGC52622	chr3	67.581		SDCBP	NP_005616.2	chr8	58553168
AMEXTC_0340000027108_XKR7	chr3	71.837		XKR7	NP_001011718.1	chr20	31968001
AMEXTC_0340000029024_HCK	chr3	71.837		HCK	NP_002101.2	chr20	32052187
AMEXTC_0340000033811_MYLK2	chr3	71.837		MYLK2	NP_149109.1	chr20	31819374
AMEXTC_0340000056059_LOC103048898	chr3	71.837		TTLL9	NP_001008409.1	chr20	31870636
AMEXTC_0340000149518_cox4i2	chr3	71.837		COX4I2	NP_115998.2	chr20	31637887
AMEXTC_0340000151226_COMMD7	chr3	71.837		COMMD7	NP_444269.2	chr20	32702690
AMEXTC_0340000199164_CCM2L	chr3	71.837		CCM2L	NP_542192.2	chr20	32010441
AMEXTC_0340000232604_mapre1.L	chr3	71.837		MAPRE1	NP_036457.1	chr20	32819892
AMEXTC_0340000274041_LOC102377907	chr3	71.837		ASXL1	NP_056153.2	chr20	32358343
AMEXTC_0340000284734_TM9SF4	chr3	71.837		TM9SF4	NP_055557.2	chr20	32109505
AMEXTC_0340000009821_PHACTR3	chr3	72.773		PHACTR3	NP_542403.1	chr20	59604546
AMEXTC_0340000227201_prelid3b.S	chr3	72.773		PRELID3B	NP_057129.2	chr20	59033144
AMEXTC_0340000269321_LOC108702639	chr3	72.773		AIG1	NP_057192.2	chr6	143060841
AMEXTC_0340000202474_LOC101945969	chr3	76.071		PPP4R1	NP_005125.1	chr18	9546790
AMEXTC_0340000013969_LOC108794146	chr3	81.648		ABCC1	NP_004987.2	chr16	15949576
AMEXTC_0340000017599_SAMSN1	chr3	81.648		SAMSN1	NP_071419.3	chr21	14485227
AMEXTC_0340000055515_PCK1	chr3	84.701		PCK1	NP_002582.3	chr20	57561080
AMEXTC_0340000032201_CASS4	chr3	91.39		CASS4	NP_001157587.1	chr20	56412257
AMEXTC_0340000260407_AURKA	chr3	91.39		AURKA	NP_003591.2	chr20	56369388
AMEXTC_0340000175612_ZFP64	chr3	109.105		ZFP64	NP_060667.2	chr20	52151277
AMEXTC_0340000016043_SNAI1	chr3	110.52		SNAI2	NP_003059.1	chr8	48917680
AMEXTC_0340000034102_AP3B2	chr3	110.52		AP3B2	NP_004635.2	chr15	82659280
AMEXTC_0340000101291_DUOX2	chr3	110.52		DUOX2	NP_054799.4	chr15	45092653
AMEXTC_0340000142942_DUOXA2	chr3	110.52		DUOXA1	NP_653166.2	chr15	45117365
AMEXTC_0340000294788_RBPMS2	chr3	110.52		RBPMS2	NP_919248.1	chr15	64739890
AMEXTC_0340000023818_dpm1	chr3	111.213		DPM1	NP_003850.1	chr20	50934854
AMEXTC_0340000027854_ADNP	chr3	111.213		ADNP	NP_056154.1	chr20	50888917
AMEXTC_0340000029511_RIPOR3	chr3	111.213		RIPOR3	NP_543019.2	chr20	50586109
AMEXTC_0340000036383_SNX21	chr3	111.213		SNX21	NP_219489.1	chr20	45833830
AMEXTC_0340000131931_DDX27	chr3	111.213		DDX27	NP_060365.7	chr20	49219294
AMEXTC_0340000159635_ZNFX1	chr3	111.213		ZNFX1	NP_066363.1	chr20	49245900
AMEXTC_0340000221379_SLC35C2	chr3	111.213		SLC35C2	NP_057029.8	chr20	46349527
AMEXTC_0340000231160_ZSWIM3	chr3	113.351		ZSWIM3	NP_542790.2	chr20	45857580
AMEXTC_0340000054019_PCIF1	chr3	115.49		PCIF1	NP_071387.1	chr20	45934677
AMEXTC_0340000060944_KCNB1	chr3	115.49		KCNB1	NP_004966.1	chr20	49363876
AMEXTC_0340000062861_LOC102446471	chr3	115.49		TGM2	NP_004604.2	chr20	38127386
AMEXTC_0340000064886_LOC104267936	chr3	115.49		TGM6	NP_945345.2	chr20	2380907
AMEXTC_0340000186865_PLTP	chr3	115.49		PLTP	NP_006218.1	chr20	45898619
AMEXTC_0340000269338_CTSA	chr3	115.49		CTSA	NP_000299.2	chr20	45890143
AMEXTC_0340000038326_ARFGEF2	chr3	117.618		ARFGEF2	NP_006411.2	chr20	48921737
AMEXTC_0340000150588_brefeldin	chr3	117.618		CSE1L	NP_001307.2	chr20	49046245
AMEXTC_0340000005608_PREX1	chr3	119.757		PREX1	NP_065871.2	chr20	48624254
AMEXTC_0340000005605_SULF2	chr3	124.119		SULF2	NP_061325.1	chr20	47657405
AMEXTC_0340000228353_NCOA3	chr3	124.119		NCOA3	NP_006525.2	chr20	47501856
AMEXTC_0340000171202_SLC13A3	chr3	126.247		SLC13A3	NP_073740.2	chr20	46557822
AMEXTC_0340000213479_tp53rk	chr3	126.247		TP53RK	NP_291028.3	chr20	46684364
AMEXTC_0340000042820_Ttpal	chr3	130.503		TTPAL	NP_077307.2	chr20	44475885
AMEXTC_0340000057559_ada	chr3	130.503		ADA	NP_000013.2	chr20	44619518
AMEXTC_0340000155251_SERINC3	chr3	130.503		SERINC1	NP_065806.1	chr6	122443347
AMEXTC_0340000279838_R3HDML	chr3	130.503		PI15	NP_056970.1	chr8	74824536
AMEXTC_0340000044428_rims4	chr3	132.631		RIMS4	NP_892015.1	chr20	44751803
AMEXTC_0340000180240_ywhab.L	chr3	132.631		YWHAB	NP_003395.1	chr20	44885598
AMEXTC_0340000135263_NCOA5	chr3	134.759		NCOA5	NP_066018.1	chr20	46060986
AMEXTC_0340000016556_ABLIM3	chr3	139.109		ABLIM3	NP_055760.1	chr5	149141446
AMEXTC_0340000019964_SLC12A5	chr3	139.109		SLC12A5	NP_065759.1	chr20	46029181
AMEXTC_0340000035141_ZNF335	chr3	139.109		ZNF335	NP_071378.1	chr20	45948652
AMEXTC_0340000145151_matrix	chr3	139.109		MMP9	NP_004985.2	chr20	46008907
AMEXTC_0340000170674_SH3PXD2B	chr3	139.109		SH3PXD2B	NP_001017995.1	chr5	172333498
AMEXTC_0340000262767_STK10	chr3	139.109		STK10	NP_005981.3	chr5	172042069
AMEXTC_0340000275185_UBTD2	chr3	139.109		UBTD2	NP_689490.2	chr5	172209645
AMEXTC_0340000240698_GRPEL2	chr3	141.237		GRPEL2	NP_689620.2	chr5	149345413
AMEXTC_0340000023797_PPARGC1B	chr3	143.365		PPARGC1B	NP_573570.3	chr5	149730251
AMEXTC_0340000025100_PCYOX1L	chr3	143.365		PCYOX1L	NP_076933.3	chr5	149358006
AMEXTC_0340000203925_ARHGEF37	chr3	143.365		ARHGEF37	NP_001001669.2	chr5	149581571
AMEXTC_0340000162989_FBXO38	chr3	145.493		FBXO38	NP_110420.3	chr5	148383934
AMEXTC_0340000002543_GPRIN1	chr3	147.599		GPRIN1	NP_443131.2	chr5	176595801
AMEXTC_0340000012101_LOC108713229	chr3	147.599		HK2	NP_000180.2	chr2	74832654
AMEXTC_0340000030234_LOC109141183	chr3	147.599		UNC5A	NP_588610.2	chr5	176810558
AMEXTC_0340000066756_faf2	chr3	147.599		FAF2	NP_055428.1	chr5	176448354
AMEXTC_0340000152563_tspan17	chr3	147.599		TSPAN17	NP_001006617.2	chr5	176647386
AMEXTC_0340000152563_tspan17	chr3	147.599		TSPAN5	NP_005714.2	chr4	98470366
AMEXTC_0340000157778_KIAA1191	chr3	147.599		KIAA1191	NP_065177.2	chr5	176346060
AMEXTC_0340000161133_arl10	chr3	147.599		ARL10	NP_775935.1	chr5	176365467
AMEXTC_0340000168358_SIMC1	chr3	147.599		SIMC1	NP_001295124.1	chr5	176238358
AMEXTC_0340000217837_RNF44	chr3	147.599		RNF44	NP_055716.1	chr5	176526698
AMEXTC_0340000227008_LOC108710984	chr3	147.599		EIF4E	NP_001124151.1	chr4	98871683
AMEXTC_0340000260730_faf2	chr3	147.599		FAF2	NP_055428.1	chr5	176448354
AMEXTC_0340000007075_dbn1	chr3	149.727		DBN1	NP_004386.2	chr5	177456612
AMEXTC_0340000053998_UIMC1	chr3	149.727		UIMC1	NP_057374.3	chr5	176905004
AMEXTC_0340000213569_Protein	chr3	149.727		DDX41	NP_057306.2	chr5	177511576
AMEXTC_0340000227058_LOC104514387	chr3	149.727		NSD1	NP_071900.2	chr5	177133831
AMEXTC_0340000012733_LOC102946027	chr3	154.077		GFRA1	NP_005255.1	chr10	116056930
AMEXTC_0340000012733_LOC102946027	chr3	154.077		GFRA2	NP_001486.4	chr8	21692017
AMEXTC_0340000025033_F12	chr3	154.077		F12	NP_000496.2	chr5	177402137
AMEXTC_0340000030679_SLC34A1	chr3	154.077		SLC34A1	NP_003043.3	chr5	177384430
AMEXTC_0340000053795_LOC108784099	chr3	154.077		HARBI1	NP_776172.1	chr11	46603305
AMEXTC_0340000055353_LOC109915294	chr3	154.077		BRD8	NP_006687.3	chr5	138156883
AMEXTC_0340000072555_SLC34A1	chr3	154.077		SLC34A1	NP_003043.3	chr5	177384430
AMEXTC_0340000135342_Rab11	chr3	154.077		RAB11FIP2	NP_055719.1	chr10	118004915
AMEXTC_0340000164275_TMED9	chr3	154.077		TMED9	NP_059980.2	chr5	177592147
AMEXTC_0340000291925_LOC100487104	chr3	154.077		SLBP	NP_001293004.1	chr4	1692730
AMEXTC_0340000003337_ITGAL	chr3	156.205		ITGAL	NP_002200.2	chr16	30472661
AMEXTC_0340000020073_pisd	chr3	156.205		PISD	NP_055153.1	chr22	31618490
AMEXTC_0340000024100_SRCAP	chr3	156.205		SRCAP	NP_006653.2	chr16	30699140
AMEXTC_0340000024491_SEPT1	chr3	156.205		2018-09-04	NP_004565.1	chr17	58520249
AMEXTC_0340000036127_ARMC5	chr3	156.205		ARMC5	NP_001098717.1	chr16	31458995
AMEXTC_0340000135701_RNF25	chr3	156.205		RNF25	NP_071898.2	chr2	218663863
AMEXTC_0340000141634_PHKG2	chr3	156.205		PHKG1	NP_006204.1	chr7	56080282
AMEXTC_0340000221061_STK36	chr3	156.205		STK36	NP_056505.2	chr2	218672025
AMEXTC_0340000241259_RNF40	chr3	156.205		RNF40	NP_055586.1	chr16	30761611
AMEXTC_0340000005632_LOC110090062	chr3	158.333		ITGAD	NP_005344.2	chr16	31393311
AMEXTC_0340000005632_LOC110090062	chr3	158.333		ITGAX	NP_000878.2	chr16	31355133
AMEXTC_0340000010200_PAQR4	chr3	158.333		PAQR4	NP_689554.2	chr16	2969244
AMEXTC_0340000045746_LOC102565955	chr3	158.333		GLIPR1	NP_006842.2	chr12	75480732
AMEXTC_0340000058337_PELO	chr3	158.333		PELO	NP_057030.3	chr5	52787939
AMEXTC_0340000163928_adora2ab	chr3	158.333		ADORA2B	NP_000667.1	chr17	15944916
AMEXTC_0340000213579_LOC108701723	chr3	158.333		SPECC1	NP_001028725.1	chr17	20087021
AMEXTC_0340000213579_LOC108701723	chr3	158.333		SPECC1L	NP_056145.4	chr22	24270816
AMEXTC_0340000001373_LOC102351091	chr3	160.461		ITGAM	NP_000623.2	chr16	31259966
AMEXTC_0340000015746_MMP25	chr3	160.461		MMP25	NP_071913.1	chr16	3046680
AMEXTC_0340000179375_thoc6	chr3	160.461		THOC6	NP_077315.2	chr16	3024018
AMEXTC_0340000188993_LOC101936084	chr3	160.461		URGCP	NP_060390.3	chr7	43875893
AMEXTC_0340000004689_TTC5	chr3	162.589		TTC5	NP_612385.2	chr14	20289140
AMEXTC_0340000006266_ppil3.S	chr3	162.589		PPIL3	NP_570981.1	chr2	200870955
AMEXTC_0340000008014_Znf721	chr3	162.589		ZFP37	NP_003399.1	chr9	113041814
AMEXTC_0340000062698_tep1	chr3	162.589		TEP1	NP_009041.2	chr14	20365666
AMEXTC_0340000118553_CAVIN2	chr3	162.589		CAVIN2	NP_004648.1	chr2	191834305
AMEXTC_0340000018892_LOC100352411	chr3	166.845		ZNF467	NP_997219.1	chr7	149764181
AMEXTC_0340000026456_LOC102365082	chr3	166.845		SBK1	NP_001019572.1	chr16	28292518
AMEXTC_0340000030049_LOC108799005	chr3	166.845		PRSS8	NP_002764.1	chr16	31131432
AMEXTC_0340000051194_LOC108802072	chr3	166.845		TRIM69	NP_542783.2	chr15	44736361
AMEXTC_0340000118949_LOC108799005	chr3	166.845		PRSS27	NP_114154.1	chr16	2712417
AMEXTC_0340000277564_LOC108799995	chr3	166.845		SBK1	NP_001019572.1	chr16	28292518
AMEXTC_0340000290762_GSS	chr3	166.845		GSS	NP_000169.1	chr20	34928432
AMEXTC_0340000001812_LOC102365546	chr3	171.196		PRF1	NP_005032.2	chr10	70597347
AMEXTC_0340000003202_hypothetical	chr3	171.196		TRIM69	NP_542783.2	chr15	44736361
AMEXTC_0340000016288_MFAP4	chr3	171.196		MFAP4	NP_002395.1	chr17	19383441
AMEXTC_0340000049754_LOC104258025	chr3	171.196		MOXD1	NP_056344.2	chr6	132296054
AMEXTC_0340000064479_LOC102692872	chr3	171.196		PRF1	NP_005032.2	chr10	70597347
AMEXTC_0340000131777_znf646	chr3	171.196		ZFP62	NP_689496.4	chr5	180847610
AMEXTC_0340000216647_LOC109641883	chr3	171.196		F11	NP_000119.1	chr4	186265963
AMEXTC_0340000227208_hypothetical	chr3	171.196		TRIM69	NP_542783.2	chr15	44736361
AMEXTC_0340000277519_MAPK7	chr3	171.196		MAPK7	NP_002740.2	chr17	19378460
AMEXTC_0340000010941_DOC2A	chr3	173.324		DOC2A	NP_003577.2	chr16	30005513
AMEXTC_0340000034585_sez6l2.S	chr3	173.324		SEZ6L2	NP_036542.1	chr16	29871158
AMEXTC_0340000044044_trim72.L	chr3	173.324		TRIM72	NP_001008275.2	chr16	31214020
AMEXTC_0340000140651_mvp.L	chr3	173.324		MVP	NP_005106.2	chr16	29820393
AMEXTC_0340000209934_hirip3.L	chr3	173.324		HIRIP3	NP_003600.2	chr16	29992320
AMEXTC_0340000216423_taok2	chr3	173.324		TAOK1	NP_065842.1	chr17	29390924
AMEXTC_0340000224715_ZG16	chr3	173.324		ZG16	NP_689551.2	chr16	29778239
AMEXTC_0340000228658_Nudt9	chr3	173.324		NUDT9	NP_076952.1	chr4	87422575
AMEXTC_0340000235555_FBXL19	chr3	173.324		FBXL19	NP_001093254.2	chr16	30924574
AMEXTC_0340000269305_fructose-bisphosphate	chr3	173.324		ALDOA	NP_000025.1	chr16	30053089
AMEXTC_0340000273782_CDIPT	chr3	173.324		CDIPT	NP_006310.1	chr16	29858355
AMEXTC_0340000279862_kif22	chr3	173.324		KIF22	NP_015556.1	chr16	29790712
AMEXTC_0340000014367_LOC102355250	chr3	182.44		SLX1A	NP_001014999.1	chr16	29454500
AMEXTC_0340000014367_LOC102355250	chr3	182.44		SLX1B	NP_076949.1	chr16	29454500
AMEXTC_0340000015153_LOC106606887	chr3	182.44		CLDN4	NP_001296.1	chr7	73830862
AMEXTC_0340000122576_CORO1A	chr3	182.44		CORO1A	NP_009005.1	chr16	30183409
AMEXTC_0340000122576_CORO1A	chr3	182.44		CORO1C	NP_055140.1	chr12	108645110
AMEXTC_0340000171019_LOC102355250	chr3	182.44		BOLA2	NP_001026997.1	chr16	29453587
AMEXTC_0340000171019_LOC102355250	chr3	182.44		BOLA2B	NP_001034271.1	chr16	29453587
AMEXTC_0340000181002_cln3.L	chr3	182.44		CLN3	NP_000077.1	chr16	28477278
AMEXTC_0340000256782_LOC102357651	chr3	182.44		SULT1C2	NP_001047.1	chr2	108288638
AMEXTC_0340000028929_ACSS2	chr3	184.568		ACSS2	NP_061147.1	chr20	34876524
AMEXTC_0340000036120_CHD6	chr3	184.568		CHD6	NP_115597.3	chr20	41402102
AMEXTC_0340000038803_RBL1	chr3	184.568		RBL1	NP_002886.2	chr20	36996350
AMEXTC_0340000059450_LOC108802258	chr3	184.568		EIF3C	NP_003743.1	chr16	28379581
AMEXTC_0340000059450_LOC108802258	chr3	184.568		EIF3CL	NP_001093131.1	chr16	28379581
AMEXTC_0340000119404_prodh2	chr3	184.568		PRODH2	NP_067055.1	chr19	35799989
AMEXTC_0340000224949_RALGAPB	chr3	184.568		RALGAPB	NP_065069.1	chr20	38472805
AMEXTC_0340000244529_SOGA1	chr3	184.568		SOGA1	NP_542194.2	chr20	36777441
AMEXTC_0340000013803_SH2B1	chr3	186.696		SH2B1	NP_056318.2	chr16	28863992
AMEXTC_0340000060463_TUFM	chr3	186.696		TUFM	NP_003312.3	chr16	28842410
AMEXTC_0340000060976_RABEP2	chr3	186.696		RABEP2	NP_079092.2	chr16	28904420
AMEXTC_0340000061007_CBFA2T2	chr3	186.696		CBFA2T2	NP_005084.1	chr20	33562364
AMEXTC_0340000137599_E2F1	chr3	186.696		E2F1	NP_005216.1	chr20	33675485
AMEXTC_0340000161888_spns1.S	chr3	186.696		SPNS1	NP_114427.1	chr16	28974774
AMEXTC_0340000250203_PIGT	chr3	186.696		PIGT	NP_057021.2	chr20	45416066
AMEXTC_0340000269308_EIF2S2	chr3	186.696		EIF2S2	NP_003899.2	chr20	34088297
AMEXTC_0340000056612_LOC102363628	chr3	188.824		MATN4	NP_003824.2	chr20	45293445
AMEXTC_0340000062286_srsf3	chr3	188.824		SRSF3	NP_003008.1	chr6	36594312
AMEXTC_0340000149152_SDC4	chr3	190.952		SDC4	NP_002990.2	chr20	45325288
AMEXTC_0340000005426_LOC100489773	chr3	197.43		ASAP1	NP_060952.2	chr8	130052104
AMEXTC_0340000017215_RBM39	chr3	197.43		RBM39	NP_001310353.1	chr20	35703608
AMEXTC_0340000027019_Fer-1-like	chr3	197.43		OTOF	NP_919224.1	chr2	26457202
AMEXTC_0340000029737_MMP24	chr3	197.43		MMP24	NP_006681.1	chr20	35226735
AMEXTC_0340000034551_RBM12	chr3	197.43		RBM12	NP_006038.2	chr20	35648924
AMEXTC_0340000053082_LOC108803096	chr3	197.43		FAM83C	NP_848563.1	chr20	35285730
AMEXTC_0340000139851_NFS1	chr3	197.43		NFS1	NP_066923.3	chr20	35668687
AMEXTC_0340000235130_LOC108785080	chr3	197.43		MTSS1	NP_055566.3	chr8	124550769
AMEXTC_0340000240547_hypothetical	chr3	197.43		EIF6	NP_002203.1	chr20	35278905
AMEXTC_0340000044560_PLCG1	chr3	201.686		PLCG1	NP_002651.2	chr20	41137520
AMEXTC_0340000053602_ZHX3	chr3	201.686		ZHX3	NP_055850.1	chr20	41178448
AMEXTC_0340000054499_GGT7	chr3	201.686		GGT7	NP_821158.2	chr20	34844719
AMEXTC_0340000056793_myh7b	chr3	201.686		MYH6	NP_002462.2	chr14	23381989
AMEXTC_0340000056793_myh7b	chr3	201.686		MYH7	NP_000248.2	chr14	23412737
AMEXTC_0340000064717_ahcy	chr3	201.686		AHCY	NP_000678.1	chr20	34280264
AMEXTC_0340000088973_Itch	chr3	201.686		ITCH	NP_113671.3	chr20	34363234
AMEXTC_0340000200865_TRPC4AP	chr3	201.686		TRPC4AP	NP_955400.1	chr20	35002403
AMEXTC_0340000005818_MAFB	chr3	203.814		MAFB	NP_005452.2	chr20	40685847
AMEXTC_0340000002848_TGIF2	chr3	205.942		TGIF2	NP_068581.1	chr20	36573606
AMEXTC_0340000055039_DHX35	chr3	205.942		DHX35	NP_068750.2	chr20	38962337
AMEXTC_0340000061259_myosin	chr3	205.942		MYL9	NP_006088.2	chr20	36541483
AMEXTC_0340000215368_FAM83D	chr3	205.942		FAM83D	NP_112181.3	chr20	38926311
AMEXTC_0340000227258_LPIN3	chr3	205.942		LPIN3	NP_001288789.1	chr20	41340852
AMEXTC_0340000018204_EPB41L1	chr3	210.293		EPB41L1	NP_036288.2	chr20	36154739
AMEXTC_0340000059018_IFT52	chr3	210.293		IFT52	NP_057088.2	chr20	43590612
AMEXTC_0340000186929_Band	chr3	210.293		AAR2	NP_056326.2	chr20	36236416
AMEXTC_0340000216239_DLGAP4	chr3	210.293		DLGAP4	NP_892118.1	chr20	36461782
AMEXTC_0340000169343_SRC	chr3	214.549		SRC	NP_005408.1	chr20	37344684
AMEXTC_0340000003097_BPI	chr3	216.677		BPI	NP_001716.2	chr20	38304149
AMEXTC_0340000002043_Janus	chr3	218.805		JAKMIP2	NP_055605.2	chr5	147585440
AMEXTC_0340000008536_DRD1	chr3	218.805		DRD1	NP_000785.1	chr5	175440037
AMEXTC_0340000011413_hypothetical	chr3	218.805		BPIFB4	NP_872325.2	chr20	33081511
AMEXTC_0340000067092_Msx2	chr3	218.805		MSX2	NP_002440.2	chr5	174724571
AMEXTC_0340000200734_CREBRF	chr3	218.805		CREBRF	NP_705835.2	chr5	173056351
AMEXTC_0340000225425_CDK5RAP1	chr3	218.805		CDK5RAP1	NP_057166.4	chr20	33358838
AMEXTC_0340000266283_BNIP1	chr3	218.805		BNIP1	NP_001196.2	chr5	173144441
AMEXTC_0340000020594_gpr151	chr3	225.481		GPR151	NP_919227.2	chr5	146514853
AMEXTC_0340000035220_PPP2R2B	chr3	225.481		PPP2R2B	NP_858063.1	chr5	146589504
AMEXTC_0340000041151_dpysl3	chr3	225.481		DPYSL3	NP_001378.1	chr5	147390807
AMEXTC_0340000225273_RBM27	chr3	225.481		RBM27	NP_061862.1	chr5	146203599
AMEXTC_0340000269344_lars	chr3	225.481		LARS	NP_057544.2	chr5	146113025
AMEXTC_0340000175801_YIPF5	chr3	227.609		YIPF5	NP_110426.4	chr5	144158158
AMEXTC_0340000017831_CCNI2	chr3	229.737		CCNI	NP_006826.1	chr4	77048020
AMEXTC_0340000026893_RNF14	chr3	229.737		RNF14	NP_004281.1	chr5	141968885
AMEXTC_0340000054260_gnpda1	chr3	229.737		GNPDA1	NP_005462.1	chr5	142000668
AMEXTC_0340000160319_P4HA2	chr3	229.737		P4HA2	NP_004190.1	chr5	132192610
AMEXTC_0340000217021_SHROOM1	chr3	229.737		SHROOM3	NP_065910.3	chr4	76435099
AMEXTC_0340000277506_GDF9	chr3	229.737		GDF9	NP_005251.1	chr5	132861180
AMEXTC_0340000007438_ACSL6	chr3	234.077		ACSL6	NP_001009185.1	chr5	131949973
AMEXTC_0340000165954_slc22a4	chr3	234.077		SLC22A5	NP_003051.1	chr5	132369708
AMEXTC_0340000203938_RAPGEF6	chr3	234.077		RAPGEF6	NP_001157859.1	chr5	131423920
AMEXTC_0340000015950_FSTL4	chr3	236.215		FSTL4	NP_055897.1	chr5	133196459
AMEXTC_0340000045294_FSTL4	chr3	236.215		FSTL4	NP_055897.1	chr5	133196459
AMEXTC_0340000135001_VDAC1	chr3	244.853		VDAC1	NP_003365.1	chr5	133971874
AMEXTC_0340000180242_LOC103182116	chr3	244.853		SKP1	NP_733779.1	chr5	134156390
AMEXTC_0340000010232_SEC24A	chr3	244.999		SEC24A	NP_068817.1	chr5	134648784
AMEXTC_0340000062610_C13H5orf24	chr3	244.999		C5orf24	NP_689622.2	chr5	134845679
AMEXTC_0340000182946_DDX46	chr3	244.999		DDX46	NP_055644.2	chr5	134758733
AMEXTC_0340000036878_SLC25A48	chr3	247.127		SLC25A48	NP_001336265.1	chr5	135834675
AMEXTC_0340000012034_PHYKPL	chr3	253.581		PHYKPL	NP_699204.1	chr5	178208473
AMEXTC_0340000027855_SPOCK1	chr3	253.581		SPOCK1	NP_004589.1	chr5	136975297
AMEXTC_0340000028470_hnrnpab	chr3	253.581		HNRNPAB	NP_004490.2	chr5	178204506
AMEXTC_0340000028805_LOC102353340	chr3	253.581		BICC1	NP_001073981.1	chr10	58513143
AMEXTC_0340000043391_COL23A1	chr3	253.581		COL23A1	NP_775736.2	chr5	178237615
AMEXTC_0340000130620_nme5.L	chr3	253.581		NME5	NP_003542.1	chr5	138115171
AMEXTC_0340000003320_grin2b	chr3	255.709		GRIN2B	NP_000825.2	chr12	13537336
AMEXTC_0340000017118_PURA	chr3	255.709		PURA	NP_005850.1	chr5	140114122
[truncated: 5,967 more rows]
