# Supplementary material for: A chromosome-scale assembly of the axolotl genome
Source: HighWire-hosted journal article supplement (doi:10.1101/gr.241901.118), 2019-01-24
Supplement: Supplemental_Table_7.xlsx [file Supplemental_Table_7.xlsx]

## Sheet: Sheet1
Supplementary Table 7 - Location of BAC markers used for assembly validation and chromosome assignment.
					Gene-Specific Primers		Secondary Gene-Specific Primers (HoxC11 only)
gene	chromosome	map location (cM)	physical location	BAC clone ID	Forward	Reverse	Forward	Reverse
CLDN7	chr1	13.507	1p-tel	BbMex_134I3	CAGGAGGACTGGATCTTCTGG	GTGAGTACAAGCACTTTGGAAGTTAG
CRABP2	chr1	129.104	1p-1/5 cen	AMMCBa_542H9	AAGGGTACATAATTAGAGGGATGATG	CAGAATAACACCATAGGAAGAAGACA
NUDT21	chr1	362.163	1q cen	H3_37I11	GTTCCAAAGAATTACAAGTTGGTAGC	TGGAATACAAGTGGATAACCAAGTAA
NISCH	chr2	6.479	2p-tel	BbMex_4E17	ACTGACTGGCTAGTCCTGTCTCTG	TAAACTGGCATGTGGTAAATGTAACT
RHOA	chr2	224.586	2p1/4cen	AMMCBa_166F15	ACTCACTGTAACAAATGGCTAACAAG	GATATAGCACAACTGCAATAGGTCAT
COL1A2	chr2	546.636	2q-tel	BbMex_50B1	ACTtCCAAAGGTTTAGAACTACCTCA	AATCTGAGAGGATGAAGATGAGATTT
NANOG	chr3	39.033	3p sat	BbMex_87I6	CCTCCGTAAGGACACTAAATAACATT	AAATGTTGTCTCTCAGACATGGTTC
CHD4	chr3	44.253	3p sat	AMMCBa_355L20	GGAAAGTTTTGTACATAGTTCACACG	CTGTGTCGTTTCTTCAGTTTGATTT
EDN3	chr3	72.773	3p-4/5cen	AMMCBa_474B18	GTATACACACAGGACAATGACGTTTT	ACGCACTATGATAAACAGGCTTCTA
SOX10	chr3	267.317	3q-1/5cen	AMMCBa_134C21	GTATGGTTAGTGGGATAAGATTCCTG	ATCTAAACTCTACCACGTCTTCCTGT
HOXC10-C11	chr3	277.038	3q-1/5cen	AMMCBa_215E21	GCACACGAGACCCACAACAACAAAA	TGCCCATACAGCGAGCTTACAGACAT	ACGGTGTCCTTACACCAAGC	GCATCATCACACACCCAGAG
RARG	chr3	279.166	3q-2/5cen	AMMCBa_125F10	GATTTTGGGACGTACTGTCTAGGTAT	ATTCCTAACAACTGGTTTACAATTCC
TEX2	chr3	386.279	3q-4/5tel	AMMCBa_97O23	ATGGGTTTGTTGGTAATTTTTCTTAG	ACTTCCAAAAGCACAATTGTATATGA
BMP2	chr4	312.12	4q 1/2	AMMCBa_86A15	ACCAACAAACACAGGAAAAGAAAA	ACAAATGAGCTATTCTTCTAAAAAGTGG
EPAS1	chr4	347.539	4q 2/3cen	AMMCBa_613F5	GCAAGTAGACAATTTACTGACACACC	AGACATGGAAGATTTACCAGAGAGAG
SRF	chr4	405.674	4q-tel	AMMCBa_335B15	GTAAGCATACAGTACAGAGGTGCAGT	GCTTGTGTTCACATGTAGTCCTATTT
APCDD1	chr5	164.999	5p - 1/3 cen	AMMCBa_678O6	GTGACTTGACTATACAAATGGGACTC	CCATATCTCGATAAATCCTTCTGTC
JARID2	chr5	177.789	5p - 1/5 cen	AMMCBb_66M18	GTCTTTGCACTAGCTCTAAGGAAGAT	GTACAAAACGTATCTTGCACATGAC
NIPBL	chr6	62.765	6p-close to tel	AMMCBa_272K10	CAAATTTACAGGATTTGAGAACAGAA	GCTAGGTTAAACTCCAAGAACACTTT
KLF4	chr6	327.123	6q-1/5cen	BbMex_75J4	GAGAAGCCATACCATTGTGACC	TCTCTTTCCTTGATAAAGTTCCAGTT
KIT	chr6	437.354	6q-2/3cen	AMMCBa_37B14	TCCGTGTGGGAATCCAGTCACT	AGATGGCATATCTGGGACATATTC
PDGFRA	chr6	437.354	6q-2/3cen	AMMCBa_290F13	CTCGAGCAGCTCCACTTTCAT	GCTCTTGAAAAATCACATTTCTTGTT
LECT1	chr7	222.95	7q 1/3cen	AMMCBa_619L6	AGTCAATAGTGTTCATTTTCCGAGAT	ATCACCTAGAGTTCTCGCTCTAAGAC
FGF9	chr7	257.352	7q 1/2 cen	AMMCBa_426N21	TTTTCGATCAGTTGTATTTCATCCTA	CTGTATCCATGCACCAATATATTCAA
MMP3	chr7	272.635	7q 1/2 cen	AMMCBa_197G20	CAGCATGAAGTCTAAGAAAGTCACTC	CTCTTTACAAATATCTTGACCAGAAACA
HPX	chr7	349.052	7q tel	AMMCBa_65P1	AGTAGCCAAGTCACTTCTTTAGCAC	AATCTGTAGACCACACATCTAAGCAC
MTOR	chr8	77.511	8p 1/2	AMMCBa_324I7	CGCTTTTGTATGTTGACAGTTCTAAT	ACAGACAGAGATCCCCAATATTTATC
ANKRD1	chr8	223.93	8q 1/2	AMMCBb_110K6	AAGAAAAGTCCTACAAGAGCTCACAC	AACGTTCATTAGTTAAGTCACCTTGA
FGF8	chr8	263.172	8q 2/3 cen	AMMCBb_165N5	AGATAGTGCTCGAGAACAACTACACG	TCTAAAAGTCCACTGGAGTAGAAAAGG
E12A6	chr9	32.496	9p-tel	BbMex_28A1	GAAAGGTGGAAATACAGTTCTAAAGC	AATGACTTTAATCCTTCTTGGATCTG
NIPSNAP2	chr9	88.977	9p-cen	BbMex_80L11	ATACAGTGCCTCTTATTCAAGAAATG	TATCCAAGATTACAATTTACAGAGGC
BMPR2	chr9	123.793	9q-cen	AMMCBa_133H16	TAACAAGGACTCGCTTTAAATAGGTT	AACACTAGGACCTTAAGCACAGAAAT
FAP	chr9	209.564	9q 1/2	BbMex_81O14	CTACCTCTTGGAAAATAAAATGCTTC	GTGCTTACAACACAAAAACAAAAAGT
ZNF776	chr9	261.891	9q-tel	BbMex_147J1	GGCTTGCTTATCCAGCTGAC	CACCATCTGAAAGGGAGGAA
PCNA	chr10	116.523	10q 1/2	AMMCBa_39J11	TTCTATTGGGCACACTTGTAGATAAC	AGTAGCTATACTGCTCCCTGCATAGT
RARRES1	chr10	155.381	10q 2/3cen	H3_48K23	GCATATCATTAACAGGCAGAAGATTA	GTTCGCTTTGTAATTAGACATTCAGA
PHLDA2	chr11	91.663	11q-5/6cen	AMMCBa_26B9	GAACAGTCCCACCTCAGACTACAAA	GTAGAAGCTGGAGCAGCCAGAG
MAS1	chr12	141.384	12q 1/4cen	AMMCBa_238I20	TACTCTTGCCAATACATTTCTCACTT	ACATACAATATCACACAACCGAAGTT
TMX2	chr12	141.384	12q 1/4 cen	BbMex_79E10	CAAGAAGGACAAGTGATGATTTGAG	GCTATAAGGCAGATGGTACATAGTCA
KERA	chr12	162.888	12q1/2 cen	AMMCBa_285I14	GACCAATTACATAGTATTGGCATCC	GGAACACTAAGTTTGTAGCAAGTGAC
NGF	chr13	36.635	13p1/2	AMMCBa_163D24	CACTCTGATCATAGCTCTTCTGATTG	AACACTATTGTTGATGTTCACCTCTC
ETV4	chr13	97.224	13 q 1/2	AMMCBa_45F11	AAACTCTCTAAACCGAGACTGTGTG	GGAACATTAATCCAGTATTCTCAGG
KRT17	chr13	108.047	13q 2/3 cen	H3_82L21	CTTCAGACATCAGCTTCCAAATACT	TTTATTAAAACCAGAGAAGATGAGCA
FOS	chr14	10.729	14p 1/2	AMMCBb_89J13	CTACTTTGCTTGCTCTGTGAAGAC	GAGAGTGTCACTTAATGCTTTGCTAC
DICER1	chr14	39.091	14q cen	AMMCBa_508D24	TCTCTGTGTTTGTATCAGGTTGTGTA	AGTGCACAGATTAAGGACTGTAAATG
TRMT5	chr14	79.687	14q 1/2	BbMex_22H14	CCAGCTGTTAAAGTAAAGAAGGAAGT	GTTTTAAAAATTTCATAAGGCAGCTC
